# Supplementary material
Source: publisher figshare collection journal article supplement (https://gsajournals.figshare.com/ndownloader/files/31562441)
Supplement: Supplementary file 1 [file 31562441]

## Sheet: Up in emerin mut.
Table S1. RNA-seq data used in the study
Gene_ID	Symbol	Gene_Name	baseMean	Log2FC	IFcSE	stat	pvalue	adjusted pvalue
FBgn0000014	abd-A	abdominal A	2671.14	3.01216	0.260803	11.5495	7.42231e-31	3.86334e-29
FBgn0000015	Abd-B	Abdominal B	255.904	3.18398	0.235632	13.5125	1.31909e-41	1.48554e-39
FBgn0000017	Abl	Abl tyrosine kinase	3726.48	0.982362	0.290013	3.3873	0.000705844	0.0017776
FBgn0000024	Ace	Acetylcholine esterase	296.477	2.07167	0.494875	4.18626	2.83587e-05	9.2498e-05
FBgn0000042	Act5C	Actin 5C	48517.4	0.356837	0.0878898	4.06006	4.90611e-05	0.000153283
FBgn0000043	Act42A	Actin 42A	16588.5	1.00167	0.129864	7.71325	1.22658e-14	1.51343e-13
FBgn0000044	Act57B	Actin 57B	85519.2	2.50383	0.186645	13.4149	4.94404e-41	5.42007e-39
FBgn0000046	Act87E	Actin 87E	9913.38	2.51412	0.312224	8.0523	8.12534e-16	1.16232e-14
FBgn0000055	NA	NA	16176.9	0.952076	0.235323	4.04583	5.21374e-05	0.000162037
FBgn0000056	Adhr	Adh-related	476.52	0.764915	0.32372	2.36289	0.0181332	0.0337948
FBgn0000064	Ald1	Aldolase 1	9397.72	1.20803	0.139023	8.6894	3.64349e-18	6.74672e-17
FBgn0000071	Ama	Amalgam	37.0713	2.50845	0.665465	3.76947	0.000163593	0.00046599
FBgn0000078	Amy-d	Amylase distal	62.1849	4.4052	1.85242	2.37808	0.0174029	0.0325219
FBgn0000079	Amy-p	Amylase proximal	162.282	5.22161	1.59949	3.26455	0.00109638	0.00265271
FBgn0000083	AnxB9	Annexin B9	8217.6	1.76101	0.0958265	18.377	2.00684e-75	9.56183e-73
FBgn0000084	AnxB10	Annexin B10	1862.58	1.56494	0.15822	9.89095	4.55688e-23	1.29178e-21
FBgn0000092	CG2650	uncharacterized protein	304.895	1.89893	0.485257	3.91325	9.10634e-05	0.000271372
FBgn0000116	Argk	Arginine kinase	11516	1.29657	0.323503	4.00791	6.12583e-05	0.000188118
FBgn0000152	Axs	Abnormal X segregation	628.911	1.20945	0.118755	10.1844	2.32786e-24	7.50976e-23
FBgn0000153	b	black	110.833	1.47432	0.334306	4.41008	1.03334e-05	3.60591e-05
FBgn0000157	Dll	Distal-less	6.70886	2.98271	0.939825	3.17369	0.00150514	0.00353607
FBgn0000180	bib	big brain	315.199	1.37342	0.209865	6.54429	5.9777e-11	4.48526e-10
FBgn0000229	bsk	basket	783.832	0.939011	0.173591	5.40934	6.3257e-08	3.11954e-07
FBgn0000241	bw	brown	160.763	4.76025	0.389759	12.2133	2.63886e-34	1.72964e-32
FBgn0000244	by	blistery	2553.7	1.81103	0.14112	12.8333	1.06747e-37	8.87507e-36
FBgn0000250	cact	cactus	3421.07	0.386889	0.0951864	4.06454	4.81281e-05	0.000150558
FBgn0000261	Cat	Catalase	4159.69	1.11772	0.140751	7.94108	2.00426e-15	2.74958e-14
FBgn0000273	Pka-C1	Protein kinase, cAMP-dependent, catalytic subunit 1	3010.62	0.488194	0.135362	3.60657	0.000310266	0.000837563
FBgn0000286	Cf2	Chorion factor 2	1005.05	0.57255	0.207393	2.7607	0.00576778	0.0120026
FBgn0000287	salr	spalt-related	6.47313	2.5219	0.830497	3.03661	0.00239256	0.00538499
FBgn0000303	ChAT	Choline acetyltransferase	5.87533	2.04855	0.727772	2.81483	0.00488028	0.0103363
FBgn0000308	chic	chickadee	18961.9	0.514945	0.140545	3.66391	0.000248398	0.000684572
FBgn0000320	eya	eyes absent	3363.51	0.891538	0.347685	2.56421	0.0103411	0.0203342
FBgn0000330	cm	carmine	658.656	0.351126	0.0995214	3.52814	0.000418486	0.00110062
FBgn0000357	Cp18	Chorion protein 18	142.562	2.4834	0.747157	3.32379	0.00088802	0.00219227
FBgn0000359	Cp36	Chorion protein 36	177.441	2.77734	0.995116	2.79097	0.00525504	0.0110394
FBgn0000360	Cp38	Chorion protein 38	208.804	3.40204	1.11344	3.05543	0.0022474	0.00508974
FBgn0000382	csw	corkscrew	2673.39	0.755761	0.316498	2.38789	0.0169454	0.0317675
FBgn0000395	cv-2	crossveinless 2	556.282	2.73643	0.258815	10.5729	3.97962e-26	1.45857e-24
FBgn0000406	Cyt-b5-r	Cytochrome b5-related	445.786	1.3676	0.323625	4.22588	2.38006e-05	7.87905e-05
FBgn0000411	D	Dichaete	21.0228	3.2324	0.459483	7.03486	1.99457e-12	1.84256e-11
FBgn0000414	Dab	Disabled	1881.68	0.958636	0.29221	3.28064	0.00103573	0.00251679
FBgn0000416	Sap-r	Saposin-related	20105	0.522461	0.165981	3.14771	0.00164556	0.00384107
FBgn0000422	Ddc	Dopa decarboxylase	29.4633	1.57529	0.362807	4.34196	1.4122e-05	4.83939e-05
FBgn0000442	Pkg21D	Protein kinase, cGMP-dependent at 21D	217.899	3.14601	0.469379	6.70251	2.04875e-11	1.62587e-10
FBgn0000448	Hr3	Hormone receptor 3	68.1499	1.65685	0.352004	4.70691	2.51495e-06	9.80647e-06
FBgn0000451	ect	ectodermal	1305.83	2.67209	0.26384	10.1277	4.16434e-24	1.31267e-22
FBgn0000454	Dip-B	Dipeptidase B	4488.31	1.19891	0.104872	11.4322	2.88835e-30	1.44278e-28
FBgn0000455	Dip-C	Dipeptidase C	1452.21	0.649941	0.0673192	9.65462	4.69897e-22	1.2027e-20
FBgn0000459	disco	disconnected	207.767	2.8429	0.36161	7.86179	3.78679e-15	4.99582e-14
FBgn0000473	Cyp6a2	Cytochrome P450-6a2	594.09	3.32602	0.411841	8.07598	6.69363e-16	9.687e-15
FBgn0000477	DNaseII	Deoxyribonuclease II	69.4448	1.94117	0.43021	4.51214	6.41764e-06	2.32597e-05
FBgn0000479	dnc	dunce	2079.62	0.719458	0.180778	3.97979	6.89769e-05	0.000210102
FBgn0000482	NA	NA	748.723	0.440021	0.152607	2.88337	0.00393446	0.00848983
FBgn0000489	Pka-C3	Protein kinase, cAMP-dependent, catalytic subunit 3	1259.04	1.78401	0.253948	7.0251	2.13906e-12	1.96286e-11
FBgn0000490	dpp	decapentaplegic	970.413	2.76553	0.342701	8.0698	7.04108e-16	1.01779e-14
FBgn0000492	Dr	Drop	7.03713	2.17762	0.726602	2.99699	0.00272656	0.00607384
FBgn0000499	dsh	dishevelled	1251.31	0.269455	0.0902373	2.98608	0.00282582	0.0062724
FBgn0000504	dsx	doublesex	1170.87	1.975	0.257148	7.68042	1.5857e-14	1.93343e-13
FBgn0000527	e	ebony	375.156	1.1303	0.380945	2.96709	0.00300637	0.00665172
FBgn0000536	eas	easily shocked	1223.34	0.576777	0.142102	4.05888	4.93081e-05	0.000153939
FBgn0000543	ecd	ecdysoneless	1071.05	0.332592	0.128967	2.5789	0.00991165	0.0195893
FBgn0000546	EcR	Ecdysone receptor	1486.04	0.374107	0.134437	2.78277	0.00538965	0.0112935
FBgn0000557	eEF1alpha2	eukaryotic translation elongation factor 1 alpha 2	248.177	1.91745	0.232165	8.25901	1.46891e-16	2.2918e-15
FBgn0000567	Eip74EF	Ecdysone-induced protein 74EF	678.78	1.71394	0.367198	4.66762	3.04707e-06	1.17082e-05
FBgn0000576	ems	empty spiracles	13.7228	3.49026	0.783609	4.45409	8.425e-06	2.98966e-05
FBgn0000577	en	engrailed	13.2156	3.06528	0.584644	5.24299	1.57997e-07	7.33331e-07
FBgn0000579	Eno	Enolase	12793.2	0.767733	0.244104	3.14511	0.00166024	0.00387254
FBgn0000591	E(spl)m8-HLH	Enhancer of split m8, helix-loop-helix	4.4036	2.63039	1.00509	2.61707	0.00886888	0.0177092
FBgn0000592	Est-6	Esterase 6	76.5299	3.39937	0.666387	5.1012	3.37513e-07	1.49592e-06
FBgn0000633	CG17716	uncharacterized protein	38.9932	1.75343	0.364102	4.81577	1.4663e-06	5.93223e-06
FBgn0000635	Fas2	Fasciclin 2	6680.62	0.78264	0.215465	3.63233	0.000280873	0.000766231
FBgn0000636	Fas3	Fasciclin 3	4810.14	1.79456	0.216041	8.30658	9.84959e-17	1.58258e-15
FBgn0000639	Fbp1	Fat body protein 1	3936.24	3.54326	0.483412	7.3297	2.3066e-13	2.39315e-12
FBgn0000640	Fbp2	Fat body protein 2	2988.46	3.57647	0.497967	7.18215	6.86245e-13	6.73096e-12
FBgn0000658	fj	four-jointed	83.6325	2.24097	0.474842	4.7194	2.36544e-06	9.26139e-06
FBgn0000659	fkh	fork head	217.193	2.77349	0.615321	4.50739	6.56311e-06	2.37522e-05
FBgn0000667	Actn	alpha actinin	7577.76	1.70915	0.123044	13.8905	7.23463e-44	9.33568e-42
FBgn0000711	flw	flapwing	2526.68	1.11674	0.170766	6.53963	6.16721e-11	4.61071e-10
FBgn0000719	fog	folded gastrulation	2334.44	1.4215	0.189192	7.51354	5.75477e-14	6.43412e-13
FBgn0000723	FER	FER tyrosine kinase	746.244	1.0829	0.220695	4.90676	9.25918e-07	3.85944e-06
FBgn0001075	ft	fat	18.8937	1.52138	0.367815	4.13626	3.53009e-05	0.000112999
FBgn0001089	Gal	beta galactosidase	671.056	3.19211	0.370986	8.60438	7.67284e-18	1.37357e-16
FBgn0001090	bnb	bangles and beads	158.337	1.81293	0.437415	4.14466	3.40324e-05	0.000109249
FBgn0001092	Gapdh2	Glyceraldehyde 3 phosphate dehydrogenase 2	12317.5	0.672601	0.121552	5.53344	3.14005e-08	1.62228e-07
FBgn0001098	Gdh	Glutamate dehydrogenase	9136.19	0.708269	0.150234	4.71445	2.42369e-06	9.46853e-06
FBgn0001114	Glt	Glutactin	2890.12	2.02048	0.361219	5.59351	2.22525e-08	1.16955e-07
FBgn0001122	Galphao	G protein alpha o subunit	4055.02	1.50063	0.219956	6.82242	8.95188e-12	7.49297e-11
FBgn0001123	Galphas	G protein alpha s subunit	1461.47	1.23506	0.12994	9.50487	2.003e-21	4.97259e-20
FBgn0001124	Got1	Glutamate oxaloacetate transaminase 1	3483.18	0.333388	0.0900804	3.701	0.000214753	0.000597295
FBgn0001128	Gpdh1	Glycerol-3-phosphate dehydrogenase 1	5195.22	1.46492	0.225418	6.49869	8.10232e-11	5.95677e-10
FBgn0001134	Grd	Glycine receptor	12.909	2.85285	0.535867	5.3238	1.0162e-07	4.84553e-07
FBgn0001145	Gs2	Glutamine synthetase 2	2429.49	2.81433	0.272614	10.3235	5.51719e-25	1.83728e-23
FBgn0001149	GstD1	Glutathione S transferase D1	8725.43	1.09909	0.187833	5.8514	4.87465e-09	2.77898e-08
FBgn0001168	h	hairy	1204.88	0.789301	0.115368	6.84157	7.83274e-12	6.62334e-11
FBgn0001180	hb	hunchback	588.927	0.599962	0.204177	2.93844	0.00329863	0.00724369
FBgn0001187	Hex-C	Hexokinase C	1372.36	2.38049	0.383781	6.20271	5.54978e-10	3.63376e-09
FBgn0001189	hfw	halfway	1084.19	1.00503	0.102183	9.83561	7.90844e-23	2.17711e-21
FBgn0001202	hook	hook	924.193	0.338129	0.0678667	4.98224	6.28512e-07	2.67101e-06
FBgn0001208	Hn	Henna	138.056	1.84722	0.319953	5.77342	7.76807e-09	4.30371e-08
FBgn0001216	Hsc70-1	Heat shock protein cognate 1	77.6496	1.91077	0.303655	6.29257	3.12246e-10	2.11951e-09
FBgn0001217	Hsc70-2	Heat shock protein cognate 2	472.312	1.23684	0.233559	5.29561	1.18618e-07	5.60426e-07
FBgn0001224	Hsp23	Heat shock protein 23	2300.13	1.7713	0.538942	3.28662	0.00101398	0.0024683
FBgn0001227	Hsp67Ba	Heat shock gene 67Ba	844.759	1.01216	0.149703	6.76113	1.36916e-11	1.11807e-10
FBgn0001228	CG4456	uncharacterized protein	159.339	1.2202	0.223576	5.45766	4.82446e-08	2.42456e-07
FBgn0001235	hth	homothorax	378.117	1.97489	0.330412	5.97706	2.27202e-09	1.36564e-08
FBgn0001248	Idh	Isocitrate dehydrogenase	7518.79	0.705547	0.110022	6.41277	1.42903e-10	1.00986e-09
FBgn0001250	if	inflated	2316.68	2.17736	0.228907	9.51199	1.87047e-21	4.6593e-20
FBgn0001253	ImpE1	Ecdysone-inducible gene E1	2.13038	2.72181	1.08868	2.5001	0.0124157	0.0240134
FBgn0001258	Ldh	Lactate dehydrogenase	305.541	2.81673	0.485544	5.80118	6.58512e-09	3.69124e-08
FBgn0001259	in	inturned	11.1044	1.00703	0.454364	2.21634	0.026668	0.0478276
FBgn0001269	inv	invected	26.3857	2.24726	0.423543	5.30587	1.12135e-07	5.32438e-07
FBgn0001291	Jra	Jun-related antigen	826.156	0.935647	0.119063	7.85842	3.8901e-15	5.12666e-14
FBgn0001297	kay	kayak	4087.74	2.01906	0.266337	7.58085	3.43298e-14	3.97827e-13
FBgn0001308	Khc	Kinesin heavy chain	5663.44	0.644139	0.0873524	7.37403	1.65544e-13	1.74533e-12
FBgn0001311	kkv	krotzkopf verkehrt	130.87	1.57139	0.418526	3.75459	0.000173626	0.000491855
FBgn0001320	kni	knirps	135.564	2.48192	0.217852	11.3927	4.54645e-30	2.25286e-28
FBgn0001321	knk	knickkopf	50.357	1.98601	0.327793	6.05873	1.37204e-09	8.50265e-09
FBgn0001323	knrl	knirps-like	88.6777	2.44278	0.287051	8.5099	1.74079e-17	3.00765e-16
FBgn0001404	egh	egghead	1889.63	0.356388	0.110612	3.22198	0.00127308	0.00303705
FBgn0001624	dlg1	discs large 1	7487.24	0.399672	0.162677	2.45685	0.0140161	0.0267744
FBgn0001941	ifc	infertile crescent	2973.15	0.992805	0.109401	9.07491	1.13775e-19	2.37281e-18
FBgn0001961	Arpc1	Actin-related protein 2/3 complex, subunit 1	2817.68	1.05413	0.100931	10.4441	1.56002e-25	5.38317e-24
FBgn0001967	NimC3	Nimrod C3	12.2759	3.49168	0.688787	5.06932	3.99248e-07	1.75014e-06
FBgn0001981	esg	escargot	115.689	5.01146	0.541251	9.25904	2.06276e-20	4.62089e-19
FBgn0001987	Gli	Gliotactin	451.085	2.22057	0.209148	10.6172	2.4785e-26	9.19272e-25
FBgn0001991	Ca-alpha1D	Ca[2+]-channel protein alpha[[1]] subunit D	1063.33	2.39981	0.341519	7.02687	2.11213e-12	1.94103e-11
FBgn0002036	CG10561	uncharacterized protein	191.107	0.754993	0.132774	5.68631	1.29813e-08	7.00096e-08
FBgn0002522	lab	labial	13.3323	2.8986	1.17993	2.45659	0.0140261	0.0267856
FBgn0002535	Lcp4	Larval cuticle protein 4	2.01773	2.78116	1.23418	2.25344	0.0242313	0.0438791
FBgn0002543	robo2	roundabout 2	610.078	1.3962	0.371559	3.75767	0.000171501	0.000486057
FBgn0002562	Lsp1alpha	Larval serum protein 1 alpha	612.606	2.83418	0.50962	5.56135	2.677e-08	1.39632e-07
FBgn0002563	Lsp1beta	Larval serum protein 1 beta	1600.14	3.10097	0.513293	6.04133	1.52845e-09	9.38742e-09
FBgn0002564	Lsp1gamma	Larval serum protein 1 gamma	1064.37	3.38669	0.408751	8.28546	1.17656e-16	1.86146e-15
FBgn0002565	Lsp2	Larval serum protein 2	1886.99	3.12458	0.46643	6.69893	2.09951e-11	1.66297e-10
FBgn0002643	mam	mastermind	2994.75	1.1702	0.416181	2.81176	0.00492711	0.0104186
FBgn0002645	Map205	Microtubule-associated protein 205	6114.2	0.643144	0.197671	3.25361	0.00113947	0.00274689
FBgn0002719	Men	Malic enzyme	7220.2	2.33849	0.122101	19.1521	9.28781e-82	6.05565e-79
FBgn0002772	Mlc1	Myosin alkali light chain 1	8649.86	2.24816	0.177986	12.6311	1.422e-36	1.10791e-34
FBgn0002773	Mlc2	Myosin light chain 2	34421.4	2.45041	0.180612	13.5672	6.26445e-42	7.11963e-40
FBgn0002789	Mp20	Muscle protein 20	7961.33	1.85946	0.185317	10.0339	1.08116e-23	3.31521e-22
FBgn0002842	sa	spermatocyte arrest	4.03214	1.54329	0.701381	2.20035	0.0277818	0.049598
FBgn0002865	Mst98Ca	Male-specific RNA 98Ca	9.44777	5.09019	1.46755	3.46849	0.000523398	0.00135277
FBgn0002868	MtnA	Metallothionein A	9376.95	2.62684	0.396614	6.62318	3.51557e-11	2.70671e-10
FBgn0002917	na	narrow abdomen	17.5254	2.99226	0.683902	4.37527	1.2128e-05	4.19083e-05
FBgn0002921	Atpalpha	Na pump alpha subunit	15518.8	1.28705	0.124221	10.3609	3.73338e-25	1.2671e-23
FBgn0002930	nec	necrotic	750.731	2.41298	0.197451	12.2207	2.41003e-34	1.59655e-32
FBgn0002931	net	net	28.3095	1.58839	0.400446	3.96655	7.29204e-05	0.000221135
FBgn0002939	ninaD	neither inactivation nor afterpotential D	975.518	3.59638	0.221874	16.2091	4.3511e-59	1.05689e-56
FBgn0002945	nkd	naked cuticle	349.815	1.66501	0.369106	4.51093	6.45439e-06	2.33792e-05
FBgn0002973	numb	numb	1637.9	0.4925	0.112304	4.3854	1.15772e-05	4.01059e-05
FBgn0002985	odd	odd skipped	14.3982	3.0004	0.889601	3.37275	0.000744215	0.0018674
FBgn0003009	ord	orientation disruptor	113.832	1.84355	0.312205	5.90493	3.5279e-09	2.06344e-08
FBgn0003067	Pepck1	Phosphoenolpyruvate carboxykinase 1	1286.62	2.29925	0.378026	6.08226	1.185e-09	7.3768e-09
FBgn0003071	Pfk	Phosphofructokinase	2005.04	0.86775	0.159472	5.4414	5.28622e-08	2.6363e-07
FBgn0003074	Pgi	Phosphoglucose isomerase	4314.59	0.968394	0.226628	4.27306	1.9281e-05	6.45899e-05
FBgn0003076	Pgm1	Phosphoglucose mutase 1	2974.76	0.53988	0.207871	2.59718	0.00939917	0.0186508
FBgn0003090	pk	prickle	386.056	1.24601	0.455162	2.7375	0.00619074	0.0127839
FBgn0003091	Pkc53E	Protein C kinase 53E	759.12	3.4045	0.178309	19.0932	2.87364e-81	1.61812e-78
FBgn0003093	Pkc98E	Protein C kinase 98E	2025.48	0.54842	0.171512	3.19756	0.00138594	0.00328405
FBgn0003117	pnr	pannier	75.0807	2.45798	0.308315	7.97231	1.5573e-15	2.16276e-14
FBgn0003129	Poxm	Pox meso	332.235	2.83473	0.260671	10.8748	1.52042e-27	6.19572e-26
FBgn0003134	Pp1alpha-96A	Protein phosphatase 1alpha at 96A	2844.72	0.169507	0.0724092	2.34097	0.0192339	0.0356531
FBgn0003137	Ppn	Papilin	29208.7	2.11857	0.45723	4.63349	3.59557e-06	1.35923e-05
FBgn0003149	Prm	Paramyosin	14991.2	2.41795	0.213063	11.3485	7.54141e-30	3.64933e-28
FBgn0003159	CG2841	uncharacterized protein	2582.82	1.20077	0.170164	7.05657	1.70666e-12	1.58963e-11
FBgn0003162	Pu	Punch	165.306	0.936397	0.322022	2.90787	0.00363904	0.00790329
FBgn0003169	put	punt	1986.39	0.223647	0.0733734	3.04807	0.00230315	0.00520172
FBgn0003206	Ras64B	Ras oncogene at 64B	3195.46	1.54411	0.127236	12.1357	6.83055e-34	4.31719e-32
FBgn0003209	raw	raw	1355.82	0.596436	0.158046	3.77381	0.000160775	0.000458913
FBgn0003231	ref(2)P	refractory to sigma P	3938.21	0.68298	0.107194	6.37144	1.87264e-10	1.30621e-09
FBgn0003250	Rh4	Rhodopsin 4	6.1316	1.7517	0.751387	2.33129	0.0197378	0.0365053
FBgn0003254	rib	ribbon	15.852	5.58816	0.905039	6.17449	6.63759e-10	4.2983e-09
FBgn0003255	rk	rickets	375.075	3.18502	0.421197	7.56184	3.97395e-14	4.55827e-13
FBgn0003270	amos	absent MD neurons and olfactory sensilla	1.18026	4.19053	1.81715	2.30611	0.0211046	0.0387496
FBgn0003301	rut	rutabaga	940.928	2.17127	0.411168	5.28074	1.28667e-07	6.04216e-07
FBgn0003308	ry	rosy	287.294	2.67553	0.418041	6.40015	1.55227e-10	1.09259e-09
FBgn0003326	sca	scabrous	33.1992	2.46727	0.664414	3.71345	0.000204456	0.000571094
FBgn0003358	Jon99Ci	Jonah 99Ci	4.98255	3.40308	1.2787	2.66136	0.00778264	0.0157406
FBgn0003371	sgg	shaggy	4561.08	0.300225	0.124936	2.40302	0.0162601	0.0306778
FBgn0003378	Sgs8	Salivary gland secretion 8	4.89273	2.23382	0.679527	3.28731	0.00101149	0.00246271
FBgn0003380	Sh	Shaker	34.8144	1.57352	0.469755	3.34967	0.000809088	0.00201589
FBgn0003386	Shaw	Shaker cognate w	373.72	2.5081	0.336937	7.44381	9.78197e-14	1.0593e-12
FBgn0003390	shf	shifted	534.098	1.17912	0.208717	5.64939	1.6102e-08	8.61276e-08
FBgn0003429	slo	slowpoke	669.862	3.0701	0.295913	10.375	3.22091e-25	1.09919e-23
FBgn0003435	sm	smooth	1052.74	0.85473	0.162515	5.25939	1.44534e-07	6.73367e-07
FBgn0003460	so	sine oculis	711.673	2.65993	0.343183	7.75075	9.13483e-15	1.14769e-13
FBgn0003463	sog	short gastrulation	911.34	1.3566	0.25954	5.22694	1.72336e-07	7.94824e-07
FBgn0003499	sr	stripe	95.089	1.06935	0.467055	2.28956	0.0220467	0.0402646
FBgn0003507	srp	serpent	1058.25	1.01461	0.326874	3.10398	0.00190936	0.00439322
FBgn0003513	ss	spineless	2.4981	2.84962	1.02626	2.77672	0.00549106	0.011473
FBgn0003514	sqh	spaghetti squash	3812.16	1.06815	0.101889	10.4835	1.02871e-25	3.64105e-24
FBgn0003515	st	scarlet	440.031	1.9986	0.314373	6.35741	2.05181e-10	1.42477e-09
FBgn0003651	svp	seven up	40.5611	2.0291	0.485569	4.1788	2.93046e-05	9.53074e-05
FBgn0003660	Syb	Synaptobrevin	3182.65	0.555677	0.137571	4.03919	5.36365e-05	0.000166362
FBgn0003719	tld	tolloid	92.3876	2.95852	0.538714	5.49182	3.97821e-08	2.02974e-07
FBgn0003721	Tm1	Tropomyosin 1	19798.2	1.63904	0.0889276	18.4312	7.38394e-76	3.65889e-73
FBgn0003748	Treh	Trehalase	5632.57	1.13035	0.157233	7.18901	6.52608e-13	6.41118e-12
FBgn0003867	tsl	torso-like	109.126	0.922175	0.310207	2.97277	0.00295126	0.00653327
FBgn0003884	alphaTub84B	alpha-Tubulin at 84B	58132.3	0.994109	0.11395	8.7241	2.68316e-18	5.05151e-17
FBgn0003888	betaTub60D	beta-Tubulin at 60D	4961.68	1.50316	0.25087	5.99178	2.07562e-09	1.25081e-08
FBgn0003889	betaTub85D	beta-Tubulin at 85D	14.7958	3.06518	0.922394	3.32307	0.000890332	0.00219666
FBgn0003890	betaTub97EF	beta-Tubulin at 97EF	2187.93	0.858114	0.182971	4.6899	2.73332e-06	1.06013e-05
FBgn0003892	ptc	patched	876.735	1.43083	0.361126	3.96215	7.42782e-05	0.000224813
FBgn0003900	twi	twist	4.21268	2.26888	0.775636	2.92519	0.00344245	0.00752251
FBgn0003943	Ubi-p63E	Ubiquitin-63E	12489.4	0.588735	0.166419	3.53768	0.000403662	0.00106554
FBgn0003944	Ubx	Ultrabithorax	37.4836	1.37132	0.349009	3.92918	8.52375e-05	0.000255362
FBgn0003961	Uro	Urate oxidase	489.925	3.93357	1.12689	3.49063	0.000481876	0.00125436
FBgn0003963	ush	u-shaped	1266.17	1.60843	0.386445	4.16212	3.15304e-05	0.000101798
FBgn0003984	vn	vein	251.902	2.33407	0.360968	6.46613	1.00545e-10	7.27119e-10
FBgn0004034	y	yellow	6.69301	2.65458	0.819711	3.23844	0.00120187	0.00287872
FBgn0004045	Yp1	Yolk protein 1	7116.9	1.82242	0.512689	3.55463	0.000378513	0.00100493
FBgn0004047	Yp3	Yolk protein 3	5253.45	1.79298	0.48981	3.66055	0.000251671	0.000692977
FBgn0004055	uzip	unzipped	1015.33	0.96545	0.197987	4.87634	1.08072e-06	4.44636e-06
FBgn0004057	Zw	Zwischenferment	1401.08	0.58818	0.120143	4.89568	9.79686e-07	4.06578e-06
FBgn0004101	bs	blistered	566.216	0.823529	0.259964	3.16786	0.00153567	0.00360368
FBgn0004108	Nrt	Neurotactin	1248.65	0.61793	0.204572	3.0206	0.00252278	0.00565037
FBgn0004117	Tm2	Tropomyosin 2	13945.5	2.58481	0.176572	14.6389	1.58617e-48	2.51916e-46
FBgn0004133	blow	blown fuse	832.812	1.68607	0.208749	8.07704	6.63603e-16	9.62613e-15
FBgn0004143	nullo	nullo	3.42814	3.82581	1.11353	3.43575	0.000590927	0.00151123
FBgn0004169	up	upheld	25991.5	2.52377	0.181214	13.927	4.34318e-44	5.6635e-42
FBgn0004179	Csp	Cysteine string protein	3402.07	0.341779	0.0955214	3.57804	0.000346187	0.000926055
FBgn0004197	Ser	Serrate	33.444	3.06327	0.608154	5.03699	4.72901e-07	2.05122e-06
FBgn0004228	mex1	midgut expression 1	61.1283	2.68059	1.06741	2.51131	0.0120285	0.0233373
FBgn0004359	T48	Transcript 48	602.314	0.517438	0.198985	2.60039	0.00931191	0.0184895
FBgn0004360	Wnt2	Wnt oncogene analog 2	325.647	1.05261	0.25954	4.05566	4.99929e-05	0.000155998
FBgn0004364	18w	18 wheeler	1068.69	1.48368	0.303529	4.88809	1.01818e-06	4.20863e-06
FBgn0004370	Ptp10D	Protein tyrosine phosphatase 10D	4170.65	1.38113	0.171979	8.03079	9.68477e-16	1.36958e-14
FBgn0004372	aly	always early	7.53195	2.56496	0.792509	3.23651	0.00121003	0.00289602
FBgn0004380	Klp64D	Kinesin-like protein at 64D	421.597	0.947046	0.150042	6.31186	2.75702e-10	1.88383e-09
FBgn0004381	Klp68D	Kinesin-like protein at 68D	494.675	0.471487	0.0850296	5.54497	2.93997e-08	1.52514e-07
FBgn0004387	Klp98A	Kinesin-like protein at 98A	1545.03	0.428879	0.164337	2.60975	0.00906091	0.0180316
FBgn0004396	CrebA	Cyclic-AMP response element binding protein A	377.476	0.905148	0.1847	4.90063	9.55306e-07	3.96859e-06
FBgn0004397	Vinc	Vinculin	3051.07	1.9635	0.349064	5.62505	1.85457e-08	9.83494e-08
FBgn0004426	NA	NA	3.03193	6.2015	2.38861	2.59628	0.00942393	0.0186898
FBgn0004427	LysD	Lysozyme D	32.1898	6.45493	2.21403	2.91547	0.00355158	0.00773641
FBgn0004436	Ubc6	Ubiquitin conjugating enzyme 6	2064	0.38885	0.110332	3.52436	0.000424511	0.00111463
FBgn0004449	Ten-m	Tenascin major	3266.46	2.24398	0.453584	4.94721	7.52834e-07	3.16891e-06
FBgn0004456	mew	multiple edematous wings	3765.58	1.32777	0.176538	7.52116	5.42918e-14	6.10869e-13
FBgn0004509	Fur1	Furin 1	2396.57	0.986009	0.262201	3.76051	0.000169569	0.00048113
FBgn0004512	Mdr49	Multi drug resistance 49	372.219	2.98905	0.531068	5.62838	1.81912e-08	9.66347e-08
FBgn0004513	Mdr65	Multi drug resistance 65	129.845	2.66715	0.279087	9.55668	1.2159e-21	3.06719e-20
FBgn0004514	Oct-TyrR	Octopamine-Tyramine receptor	376.415	2.94731	0.352621	8.35828	6.36393e-17	1.05396e-15
FBgn0004554	Edg91	Ecdysone-dependent gene 91	13.7254	3.45596	0.515108	6.7092	1.95689e-11	1.56098e-10
FBgn0004569	aos	argos	228.316	1.22018	0.234253	5.20881	1.90051e-07	8.71338e-07
FBgn0004574	Rop	Ras opposite	1882.56	0.961346	0.110191	8.72436	2.67679e-18	5.0472e-17
FBgn0004580	Cbp53E	Calbindin 53E	41.0207	2.62549	0.455969	5.75803	8.50992e-09	4.69581e-08
FBgn0004581	bgcn	benign gonial cell neoplasm	129.29	2.11346	0.395973	5.33739	9.42963e-08	4.52243e-07
FBgn0004606	zfh1	Zn finger homeodomain 1	3177.09	2.37548	0.409302	5.80373	6.48576e-09	3.64379e-08
FBgn0004611	Plc21C	Phospholipase C at 21C	2388.35	1.20706	0.190915	6.32249	2.57379e-10	1.76545e-09
FBgn0004620	GluRIIA	Glutamate receptor IIA	254.761	2.46293	0.191001	12.8949	4.81036e-38	4.13824e-36
FBgn0004629	Cys	Cystatin-like	1117.42	1.98243	0.17845	11.1092	1.13184e-28	5.09864e-27
FBgn0004635	rho	rhomboid	44.8349	1.36326	0.41076	3.31888	0.000903803	0.00222546
FBgn0004638	drk	downstream of receptor kinase	2911.41	0.767542	0.145116	5.28914	1.2289e-07	5.78406e-07
FBgn0004644	hh	hedgehog	90.655	0.667865	0.277874	2.40348	0.0162399	0.0306443
FBgn0004657	mys	myospheroid	5304.49	1.20209	0.186613	6.44161	1.18211e-10	8.45007e-10
FBgn0004666	sim	single-minded	1846.65	2.74656	0.242517	11.3252	9.84292e-30	4.70788e-28
FBgn0004687	Mlc-c	Myosin light chain cytoplasmic	5363.52	0.476053	0.165063	2.88407	0.0039257	0.0084724
FBgn0004777	Ccp84Ag	Ccp84Ag	38.8516	2.65002	0.610397	4.34147	1.41531e-05	4.84735e-05
FBgn0004779	Ccp84Ae	Ccp84Ae	4.6747	1.86931	0.781738	2.39122	0.0167924	0.0315236
FBgn0004782	Ccp84Ab	Ccp84Ab	4.07892	3.67059	1.08349	3.38774	0.000704718	0.00177548
FBgn0004839	otk	off-track	443.315	0.741329	0.332015	2.23282	0.0255611	0.0460182
FBgn0004852	Ac76E	Adenylyl cyclase 76E	509.93	1.49317	0.345419	4.32278	1.54079e-05	5.23943e-05
FBgn0004858	elB	elbow B	681.248	1.68403	0.261379	6.44287	1.17236e-10	8.39006e-10
FBgn0004861	ph-p	polyhomeotic proximal	1105.64	1.04076	0.262759	3.96088	7.46729e-05	0.000225897
FBgn0004864	hop	hopscotch	2452.16	1.09464	0.158658	6.89935	5.22421e-12	4.54158e-11
FBgn0004865	Eip78C	Ecdysone-induced protein 78C	41.7537	1.76377	0.264514	6.66795	2.59393e-11	2.02736e-10
FBgn0004870	bab1	bric a brac 1	136.161	1.46808	0.34257	4.28549	1.82339e-05	6.13641e-05
FBgn0004880	scrt	scratch	4.16239	2.28902	1.00836	2.27004	0.0232054	0.0421693
FBgn0004885	tok	tolkin	1782.12	2.84265	0.340986	8.33655	7.64869e-17	1.25333e-15
FBgn0004892	sob	sister of odd and bowl	11.3392	3.53269	0.542013	6.51771	7.13882e-11	5.27659e-10
FBgn0004893	bowl	brother of odd with entrails limited	1317.79	0.469465	0.137484	3.4147	0.000638531	0.00162356
FBgn0004907	14-3-3zeta	14-3-3zeta	29858.3	0.34404	0.0944484	3.64263	0.00026987	0.000738654
FBgn0004910	Eip63F-1	Ecdysone-induced protein 63F 1	616.324	2.0005	0.200565	9.97435	1.97395e-23	5.83257e-22
FBgn0004919	gol	goliath	158.794	0.873284	0.268338	3.25442	0.00113623	0.00274005
FBgn0004921	Ggamma1	G protein gamma 1	5167.93	0.357849	0.142831	2.5054	0.0122314	0.0236868
FBgn0004959	phm	phantom	317.055	0.863661	0.365628	2.36213	0.0181703	0.0338537
FBgn0005536	Mbs	Myosin binding subunit	4231.66	1.34232	0.213139	6.29787	3.01757e-10	2.04943e-09
FBgn0005564	Shal	Shaker cognate l	312.601	1.95836	0.182357	10.7391	6.66639e-27	2.57269e-25
FBgn0005585	Calr	Calreticulin	18581.1	0.560972	0.122689	4.5723	4.82392e-06	1.78865e-05
FBgn0005612	Sox14	Sox box protein 14	621.407	1.73945	0.217334	8.00358	1.20854e-15	1.70323e-14
FBgn0005626	ple	pale	519.26	1.26281	0.335388	3.76524	0.000166391	0.00047309
FBgn0005631	robo1	roundabout 1	912.983	1.42313	0.294414	4.83379	1.3396e-06	5.44278e-06
FBgn0005636	nvy	nervy	23.2691	1.48473	0.406283	3.65444	0.000257747	0.00070829
FBgn0005659	Ets98B	Ets at 98B	45.2703	2.56946	0.330663	7.77063	7.80996e-15	9.90275e-14
FBgn0005660	Ets21C	Ets at 21C	69.6518	2.43399	0.450249	5.40588	6.44896e-08	3.17779e-07
FBgn0005666	bt	bent	19868.3	2.01705	0.479383	4.20761	2.5809e-05	8.48969e-05
FBgn0005670	Cyp4d1	Cytochrome P450-4d1	41.8463	3.11787	0.451213	6.90996	4.84775e-12	4.22915e-11
FBgn0005671	Vha55	Vacuolar H[+]-ATPase 55kD subunit	15827.7	0.684977	0.10532	6.50379	7.8321e-11	5.76494e-10
FBgn0005672	spi	spitz	1237.22	0.479865	0.144479	3.32136	0.000895809	0.00220841
FBgn0005771	noc	no ocelli	951.142	1.18227	0.420692	2.81031	0.00494942	0.0104577
FBgn0005775	Con	Connectin	736.761	2.25639	0.436607	5.16802	2.36592e-07	1.07202e-06
FBgn0008651	lbl	ladybird late	2.15492	3.93657	1.29098	3.0493	0.00229377	0.00518323
FBgn0010015	CanA1	Calcineurin A1	64.9584	2.82539	0.458258	6.1655	7.02604e-10	4.53326e-09
FBgn0010019	Cyp4g1	Cytochrome P450-4g1	13580.2	2.08629	0.303793	6.86747	6.5351e-12	5.5948e-11
FBgn0010038	GstD2	Glutathione S transferase D2	32.8012	1.62611	0.553138	2.93978	0.00328441	0.00721406
FBgn0010039	GstD3	Glutathione S transferase D3	560.475	1.03084	0.216233	4.76724	1.86765e-06	7.42743e-06
FBgn0010040	GstD4	Glutathione S transferase D4	10.938	1.0045	0.439206	2.28709	0.0221908	0.0404979
FBgn0010041	GstD5	Glutathione S transferase D5	35.9883	2.01049	0.790371	2.54374	0.0109674	0.0214195
FBgn0010043	GstD7	Glutathione S transferase D7	8.29932	2.77487	0.977102	2.8399	0.00451282	0.00962235
FBgn0010044	GstD8	Glutathione S transferase D8	5.60354	3.34049	1.22186	2.73393	0.00625839	0.0129086
FBgn0010051	Itp-r83A	Inositol 1,4,5,-tris-phosphate receptor	3328.73	0.833599	0.281804	2.95808	0.00309564	0.00683458
FBgn0010052	Jhe	Juvenile hormone esterase	65.2817	2.77117	0.496904	5.57686	2.44895e-08	1.28061e-07
FBgn0010100	mAcon1	Mitochondrial aconitase 1	13309.7	0.54465	0.0784084	6.94632	3.74934e-12	3.30818e-11
FBgn0010105	comm	commissureless	93.3824	2.71486	0.320257	8.47714	2.30794e-17	3.93812e-16
FBgn0010114	hig	hikaru genki	7.90728	2.25628	0.608171	3.70995	0.0002073	0.000577995
FBgn0010223	Galphaf	G protein alpha f subunit	62.3211	1.8155	0.349267	5.19802	2.01418e-07	9.20384e-07
FBgn0010225	Gel	Gelsolin	2258.17	1.6566	0.0914572	18.1134	2.49736e-73	9.97977e-71
FBgn0010226	GstS1	Glutathione S transferase S1	5757.47	0.782451	0.129537	6.04036	1.53772e-09	9.43967e-09
FBgn0010235	Klc	Kinesin light chain	1900.49	0.765109	0.0890583	8.5911	8.6142e-18	1.52884e-16
FBgn0010238	Lac	Lachesin	2283.18	1.82912	0.140771	12.9936	1.32965e-38	1.24786e-36
FBgn0010241	Mdr50	Multi drug resistance 50	60.9512	3.35252	0.825961	4.05893	4.9298e-05	0.000153939
FBgn0010246	Myo61F	Myosin 61F	1975.77	0.567514	0.187804	3.02184	0.00251241	0.00562919
FBgn0010263	Rbp9	RNA-binding protein 9	1107.42	1.66702	0.176257	9.45793	3.1411e-21	7.58574e-20
FBgn0010288	Uch	Ubiquitin carboxy-terminal hydrolase	2234.36	0.692179	0.165026	4.19436	2.73644e-05	8.95614e-05
FBgn0010341	Cdc42	Cdc42	4798.8	0.321706	0.129946	2.47569	0.0132981	0.0255643
FBgn0010350	Cds	CDP-diacylglycerol synthase	1358.79	0.713844	0.103546	6.89401	5.42423e-12	4.71216e-11
FBgn0010352	Nc73EF	Neural conserved at 73EF	6627.69	0.688706	0.154578	4.45541	8.37348e-06	2.97393e-05
FBgn0010357	betaTry	betaTrypsin	645.298	6.56566	1.9512	3.36494	0.000765604	0.00191602
FBgn0010359	gammaTry	gammaTrypsin	19.538	6.70512	2.42214	2.76827	0.00563555	0.0117511
FBgn0010380	AP-1-2beta	Adaptor Protein complex 1/2, beta subunit	3614.19	0.69445	0.308987	2.24751	0.0246076	0.0444761
FBgn0010385	Def	Defensin	84.0229	2.1761	0.944493	2.30399	0.0212232	0.0389386
FBgn0010387	Acbp2	Acyl-CoA binding protein 2	757.348	2.04152	0.346636	5.88953	3.87296e-09	2.25038e-08
FBgn0010388	Dro	Drosocin	48.7258	2.2189	0.514179	4.31542	1.59302e-05	5.4037e-05
FBgn0010389	htl	heartless	1336.91	1.70591	0.189409	9.00651	2.12722e-19	4.38469e-18
FBgn0010395	Itgbn	Integrin betanu subunit	133.517	2.10318	0.494652	4.25183	2.12032e-05	7.06469e-05
FBgn0010397	LamC	Lamin C	3245.13	0.795985	0.119962	6.63532	3.23802e-11	2.5039e-10
FBgn0010399	Nmdar1	NMDA receptor 1	11.3824	2.25951	0.508453	4.44388	8.83497e-06	3.12618e-05
FBgn0010407	Ror	Ror	96.4025	4.58855	0.376021	12.2029	2.9989e-34	1.95528e-32
FBgn0010414	SerT	Serotonin transporter	5.06445	3.5115	0.940164	3.73499	0.000187723	0.000527804
FBgn0010423	TpnC47D	Troponin C at 47D	432.031	1.37987	0.345617	3.99247	6.53881e-05	0.000199711
FBgn0010424	TpnC73F	Troponin C at 73F	10279.9	2.62172	0.191829	13.667	1.59901e-42	1.92316e-40
FBgn0010425	epsilonTry	epsilonTrypsin	62.1692	5.28032	1.60686	3.2861	0.00101584	0.00247233
FBgn0010434	cora	coracle	7442.07	1.91471	0.416576	4.59632	4.30023e-06	1.60601e-05
FBgn0010435	emp	epithelial membrane protein	3542.8	2.80128	0.293519	9.54375	1.37753e-21	3.44744e-20
FBgn0010452	trn	tartan	203.196	1.73019	0.226923	7.62456	2.44867e-14	2.92801e-13
FBgn0010453	Wnt4	Wnt oncogene analog 4	458.945	0.555474	0.23406	2.37321	0.0176343	0.0329415
FBgn0010470	Fkbp14	FK506-binding protein 14	2560.66	0.300877	0.0960479	3.13257	0.00173283	0.00402519
FBgn0010473	tutl	turtle	1200.67	1.54414	0.383143	4.03019	5.5731e-05	0.000172513
FBgn0010482	l(2)01289	lethal (2) 01289	2344.38	2.17464	0.235444	9.23632	2.55132e-20	5.67428e-19
FBgn0010504	kermit	kermit	571.835	0.30741	0.112128	2.74161	0.00611394	0.0126435
FBgn0010548	Aldh-III	Aldehyde dehydrogenase type III	1329.78	0.854982	0.118416	7.22015	5.19294e-13	5.15053e-12
FBgn0010611	Hmgs	HMG Coenzyme A synthase	2285.67	0.420172	0.0923144	4.55154	5.32556e-06	1.95824e-05
FBgn0010620	CG10939	uncharacterized protein	2626.67	1.57804	0.0775882	20.3387	5.84767e-92	5.17436e-89
FBgn0010651	MFS14	Major Facilitator Superfamily Transporter 14	1980.42	0.742277	0.288448	2.57334	0.0100721	0.0198663
FBgn0010747	Srp54k	Signal recognition particle protein 54k	2449.1	0.308497	0.0876915	3.51798	0.000434848	0.00113984
FBgn0010812	unc-45	uncoordinated 45	1740.48	1.09042	0.125935	8.65859	4.7765e-18	8.75314e-17
FBgn0010894	sinu	sinuous	660.02	1.32172	0.115181	11.4752	1.75809e-30	8.92593e-29
FBgn0011205	fbl	fumble	1603.97	0.31293	0.0731271	4.27926	1.87515e-05	6.30205e-05
FBgn0011225	jar	jaguar	4191.87	0.433714	0.0717215	6.04719	1.47393e-09	9.07509e-09
FBgn0011274	Dif	Dorsal-related immunity factor	1671.19	2.42729	0.258921	9.37464	6.9412e-21	1.61935e-19
FBgn0011286	RyR	Ryanodine receptor	2149.1	2.71904	0.512295	5.30756	1.11101e-07	5.28136e-07
FBgn0011289	TfIIA-L	Transcription factor IIA L	1901.87	0.260154	0.0759377	3.42589	0.000612779	0.00156421
FBgn0011296	l(2)efl	lethal (2) essential for life	841.418	2.03431	0.248963	8.17114	3.05498e-16	4.59285e-15
FBgn0011305	Rsf1	Repressor splicing factor 1	1420.09	0.430489	0.119283	3.60899	0.000307395	0.000830494
FBgn0011559	Acp36DE	Accessory gland protein 36DE	1.70031	2.65575	1.05244	2.52342	0.0116221	0.0226126
FBgn0011570	cpb	capping protein beta	2086.81	0.609568	0.0761955	8.00005	1.24368e-15	1.74679e-14
FBgn0011576	Cyp4d2	Cytochrome P450-4d2	308.432	1.09297	0.163718	6.67595	2.45641e-11	1.92351e-10
FBgn0011581	Ms	Myosuppressin	29.1441	2.62662	0.699693	3.75396	0.000174063	0.000492981
FBgn0011589	Elk	Eag-like K[+] channel	21.824	2.70769	0.450858	6.00564	1.90573e-09	1.15443e-08
FBgn0011591	fng	fringe	1022.93	0.736794	0.230603	3.19507	0.00139795	0.00331125
FBgn0011603	ine	inebriated	356.765	3.5665	0.429056	8.31242	9.377e-17	1.5145e-15
FBgn0011656	Mef2	Myocyte enhancer factor 2	2859.1	1.6336	0.185172	8.82205	1.12385e-18	2.18218e-17
FBgn0011661	Moe	Moesin	17266.8	0.416338	0.110249	3.77633	0.000159159	0.000454719
FBgn0011695	EbpIII	Ejaculatory bulb protein III	3850.51	2.70242	0.282784	9.55649	1.21816e-21	3.06719e-20
FBgn0011701	repo	reversed polarity	17.304	2.18682	0.435117	5.02582	5.01286e-07	2.16073e-06
FBgn0011706	rpr	reaper	27.5643	2.54561	0.435391	5.84671	5.01389e-09	2.85179e-08
FBgn0011708	Syx5	Syntaxin 5	1548.13	0.217419	0.0846058	2.56978	0.0101762	0.0200492
FBgn0011710	2021-09-01	Septin 1	2823.57	0.314869	0.0588449	5.35082	8.75549e-08	4.21543e-07
FBgn0011715	Snr1	Snf5-related 1	1287.82	0.289292	0.106856	2.70729	0.00678346	0.0138784
FBgn0011722	Tig	Tiggrin	1140.02	2.48959	0.29712	8.37906	5.33498e-17	8.93105e-16
FBgn0011740	alpha-Man-IIa	alpha-Mannosidase class II a	1057.67	0.319769	0.10173	3.14332	0.00167041	0.00389333
FBgn0011745	Arp1	Actin-related protein 1	2783.22	0.450593	0.100072	4.5027	6.7096e-06	2.42328e-05
FBgn0011746	ana	anachronism	2187.09	1.76019	0.25283	6.96194	3.35611e-12	2.98246e-11
FBgn0011754	PhKgamma	Phosphorylase kinase gamma	2365.9	0.543199	0.125058	4.34357	1.40183e-05	4.80782e-05
FBgn0011770	Gip	GIP-like	2215.55	1.20784	0.254391	4.74795	2.05485e-06	8.10428e-06
FBgn0011771	Hem	HEM-protein	1831.04	0.439596	0.181057	2.42795	0.0151846	0.0288242
FBgn0011828	Pxn	Peroxidasin	6105.93	4.03981	0.54306	7.43897	1.01477e-13	1.09503e-12
FBgn0011829	Ret	Ret oncogene	35.4128	1.28849	0.281875	4.57113	4.85104e-06	1.79763e-05
FBgn0011832	Ser12	Serine protease 12	48.4997	6.39098	2.58359	2.47368	0.013373	0.0256937
FBgn0012036	Aldh	Aldehyde dehydrogenase	13125.9	0.3816	0.0792593	4.81457	1.47514e-06	5.96124e-06
FBgn0012037	Ance	Angiotensin converting enzyme	1196.87	3.45902	0.314282	11.0061	3.57069e-28	1.53058e-26
FBgn0012042	NA	NA	20.6911	2.28603	0.977818	2.33789	0.0193929	0.035921
FBgn0012051	CalpA	Calpain-A	1410.92	0.932577	0.15239	6.11966	9.37754e-10	5.93304e-09
FBgn0013276	Hsp70Ab	Heat-shock-protein-70Ab	10326.8	2.18644	0.704816	3.10214	0.00192124	0.00441482
FBgn0013279	Hsp70Ba	Heat-shock-protein-70Ba	722.411	3.07805	0.640802	4.80343	1.55969e-06	6.27318e-06
FBgn0013301	ProtB	Protamine B	3.47427	3.91404	1.54699	2.5301	0.0114031	0.022204
FBgn0013305	Nmda1	N-methyl-D-aspartate receptor-associated protein	2224.12	0.908238	0.11729	7.74351	9.67092e-15	1.20891e-13
FBgn0013307	Odc1	Ornithine decarboxylase 1	37.5867	2.78349	0.479676	5.80286	6.51935e-09	3.65769e-08
FBgn0013334	Sap47	Synapse-associated protein 47kD	1738.67	0.612099	0.226803	2.69881	0.00695882	0.0141926
FBgn0013342	nSyb	neuronal Synaptobrevin	24.3676	1.46725	0.44597	3.29002	0.0010018	0.0024425
FBgn0013467	igl	igloo	23.7438	1.66788	0.530257	3.14541	0.00165852	0.00386926
FBgn0013576	mtd	mustard	5656.97	1.59732	0.246731	6.47393	9.5486e-11	6.93365e-10
FBgn0013718	nuf	nuclear fallout	3224.09	0.253162	0.105816	2.39247	0.0167355	0.0314501
FBgn0013720	pck	pickel	770.846	1.49342	0.109446	13.6453	2.15463e-42	2.56649e-40
FBgn0013762	Cdk5	Cyclin-dependent kinase 5	554.593	0.419575	0.0962839	4.35769	1.31441e-05	4.52681e-05
FBgn0013763	Idgf6	Imaginal disc growth factor 6	4208.84	0.675906	0.127145	5.31603	1.06055e-07	5.05117e-07
FBgn0013767	Crz	Corazonin	1.30595	3.78348	1.58273	2.39047	0.0168266	0.0315783
FBgn0013770	Cp1	Cysteine proteinase-1	10745.5	0.970548	0.0884861	10.9684	5.42449e-28	2.29347e-26
FBgn0013771	Cyp6a9	Cytochrome P450-6a9	414.551	0.747307	0.204358	3.65685	0.00025533	0.000702114
FBgn0013812	Dhc93AB	Dynein heavy chain at 93AB	17.1681	4.53582	0.796377	5.69557	1.22964e-08	6.65186e-08
FBgn0013949	Elal	Elastin-like	78.1472	1.45954	0.475512	3.06941	0.00214485	0.00488337
FBgn0013953	Esp	Epidermal stripes and patches	730.142	2.76636	0.261696	10.5709	4.06577e-26	1.48137e-24
FBgn0013972	Gycalpha99B	Guanylyl cyclase alpha-subunit at 99B	4.27967	1.70336	0.692911	2.45826	0.0139611	0.0266816
FBgn0013973	Gycbeta100B	Guanylyl cyclase beta-subunit at 100B	19.4014	1.26012	0.466041	2.70388	0.00685346	0.0139939
FBgn0013983	imd	immune deficiency	332.056	0.741453	0.0813977	9.10902	8.31332e-20	1.76043e-18
FBgn0013987	MAPk-Ak2	MAP kinase activated protein-kinase-2	2859.08	0.63072	0.0741561	8.5053	1.81134e-17	3.12085e-16
FBgn0013995	Calx	Na/Ca-exchange protein	1369.98	1.07837	0.23011	4.68632	2.78167e-06	1.07719e-05
FBgn0013997	Nrx-IV	Neurexin IV	2400.66	0.969893	0.217432	4.46067	8.17056e-06	2.90937e-05
FBgn0014000	Hf	Helical Factor	89.7655	1.34863	0.281728	4.78697	1.69316e-06	6.77047e-06
FBgn0014006	Ask1	Apoptotic signal-regulating kinase 1	4370.66	1.64446	0.149142	11.0261	2.86e-28	1.23449e-26
FBgn0014009	Rab2	Rab2	2180.61	0.519642	0.138945	3.7399	0.000184096	0.000518668
FBgn0014011	Rac2	Rac2	2713.45	1.24954	0.158205	7.89824	2.82873e-15	3.79657e-14
FBgn0014018	Rel	Relish	2343.93	0.528654	0.099804	5.29692	1.17775e-07	5.56867e-07
FBgn0014019	Rh5	Rhodopsin 5	5.93105	2.82067	0.691883	4.0768	4.5659e-05	0.000143377
FBgn0014020	Rho1	Rho1	9391.33	0.733666	0.130177	5.63592	1.74131e-08	9.27099e-08
FBgn0014028	SdhB	Succinate dehydrogenase, subunit B (iron-sulfur)	3446.95	0.52425	0.0944181	5.55243	2.81721e-08	1.46514e-07
FBgn0014029	2021-09-02	Septin 2	2707.59	0.657992	0.0999412	6.58379	4.58616e-11	3.48334e-10
FBgn0014031	Spat	Serine pyruvate aminotransferase	368.664	2.48171	0.224018	11.0781	1.60175e-28	7.13757e-27
FBgn0014033	Sr-CI	Scavenger receptor class C, type I	332.361	3.76989	0.441659	8.53575	1.39251e-17	2.4365e-16
FBgn0014073	Tie	Tie-like receptor tyrosine kinase	420.291	2.44559	0.196702	12.433	1.73039e-35	1.26095e-33
FBgn0014135	bnl	branchless	148.377	1.61574	0.297282	5.43504	5.47838e-08	2.72446e-07
FBgn0014141	cher	cheerio	6696	1.39555	0.415398	3.35955	0.000780691	0.00195102
FBgn0014143	croc	crocodile	51.4441	1.4339	0.356048	4.02726	5.64311e-05	0.000174462
FBgn0014163	fax	failed axon connections	12930.7	1.5283	0.210744	7.25191	4.1093e-13	4.11861e-12
FBgn0014184	Oda	Ornithine decarboxylase antizyme	13698.6	0.602698	0.119193	5.05651	4.27e-07	1.86125e-06
FBgn0014380	RhoL	Rho-like	669.283	2.02238	0.15114	13.3809	7.82376e-41	8.42789e-39
FBgn0014396	tim	timeless	2263.7	0.408162	0.166498	2.45145	0.0142282	0.0271293
FBgn0014469	Cyp4e2	Cytochrome P450-4e2	864.59	0.594115	0.160266	3.70706	0.00020968	0.000584367
FBgn0014859	Hr38	Hormone receptor-like in 38	23.0145	1.19164	0.486214	2.45086	0.0142516	0.0271698
FBgn0014863	Mlp84B	Muscle LIM protein at 84B	3351.46	2.52273	0.144412	17.4689	2.47108e-68	8.74623e-66
FBgn0014865	Mtk	Metchnikowin	10.0501	2.43315	0.698381	3.48399	0.000494004	0.0012843
FBgn0014869	Pglym78	Phosphoglyceromutase 78	4017.17	0.977984	0.19535	5.00631	5.54824e-07	2.37579e-06
FBgn0014906	Hydr2	alpha/beta hydrolase2	1646.45	0.533099	0.0757146	7.0409	1.90997e-12	1.77234e-11
FBgn0015000	betaggt-I	beta subunit of type I geranylgeranyl transferase	908.922	0.402429	0.15521	2.59281	0.00951949	0.0188593
FBgn0015011	AhcyL2	Adenosylhomocysteinase like 2	120.913	2.83493	0.336119	8.43431	3.33161e-17	5.64596e-16
FBgn0015034	Cyp4e1	Cytochrome P450-4e1	84.6553	2.94352	0.419919	7.00972	2.38797e-12	2.17836e-11
FBgn0015035	Cyp4e3	Cytochrome P450-4e3	200.033	1.45694	0.662597	2.19883	0.0278899	0.0497596
FBgn0015038	Cyp9b1	Cytochrome P450-9b1	22.1105	2.21948	0.616529	3.59996	0.00031826	0.000857462
FBgn0015039	Cyp9b2	Cytochrome P450-9b2	151.675	2.48497	0.60881	4.08169	4.47091e-05	0.000140787
FBgn0015040	Cyp9c1	Cytochrome P450-9c1	413.78	2.89119	0.170407	16.9664	1.45671e-64	4.19669e-62
FBgn0015221	Fer2LCH	Ferritin 2 light chain homologue	7085.89	1.51452	0.124685	12.1468	5.96718e-34	3.81038e-32
FBgn0015222	Fer1HCH	Ferritin 1 heavy chain homologue	7914.26	1.31518	0.131856	9.97436	1.97376e-23	5.83257e-22
FBgn0015247	Diap2	Death-associated inhibitor of apoptosis 2	1498.97	0.242053	0.086988	2.78261	0.00539241	0.0112973
FBgn0015316	Try29F	Trypsin 29F	40.1719	0.94504	0.321206	2.94216	0.00325927	0.00716265
FBgn0015372	RabX1	RabX1	659.299	0.253854	0.0896378	2.832	0.00462586	0.00983272
FBgn0015380	drl	derailed	1289.3	2.39442	0.334315	7.16215	7.94212e-13	7.73482e-12
FBgn0015400	kek2	kekkon 2	37.175	2.9979	0.349705	8.57268	1.01108e-17	1.78423e-16
FBgn0015569	alpha-Est10	alpha-Esterase-10	296.699	0.809362	0.137593	5.8823	4.04612e-09	2.33958e-08
FBgn0015571	alpha-Est3	alpha-Esterase-3	622.027	0.657671	0.149104	4.41082	1.02982e-05	3.59465e-05
FBgn0015574	alpha-Est6	alpha-Esterase-6	19.0215	2.64903	0.496487	5.33553	9.52635e-08	4.56704e-07
FBgn0015575	alpha-Est7	alpha-Esterase-7	308.151	2.32055	0.127618	18.1836	6.96329e-74	3.08076e-71
FBgn0015576	alpha-Est8	alpha-Esterase-8	480.405	2.95361	0.407743	7.24379	4.36312e-13	4.36241e-12
FBgn0015577	alpha-Est9	alpha-Esterase-9	719.508	1.46501	0.166507	8.79848	1.38679e-18	2.6635e-17
FBgn0015582	dare	defective in the avoidance of repellents	516.624	0.222059	0.092024	2.41306	0.0158193	0.0299098
FBgn0015583	Acp29AB	Accessory gland protein 29AB	6.25305	7.18617	1.71818	4.18244	2.88403e-05	9.39452e-05
FBgn0015591	AstA	Allatostatin A	8.67913	2.64434	0.679116	3.89379	9.86894e-05	0.00029206
FBgn0015622	Cnx99A	Calnexin 99A	5588.34	0.29555	0.0893688	3.30708	0.000942734	0.00230939
FBgn0015623	Cpr	Cytochrome P450 reductase	5098.47	0.944524	0.084385	11.193	4.41089e-29	2.01631e-27
FBgn0015714	Cyp6a17	Cytochrome P450-6a17	184.901	7.29259	0.605035	12.0532	1.86659e-33	1.15707e-31
FBgn0015721	ktub	king tubby	8.42289	2.25859	0.623185	3.62427	0.000289779	0.000787406
FBgn0015765	p38a	p38a MAP kinase	599.969	0.7599	0.117132	6.48757	8.72295e-11	6.36395e-10
FBgn0015766	Msr-110	Msr-110	5415.87	3.17562	0.340996	9.31278	1.24527e-20	2.85675e-19
FBgn0015773	NetA	Netrin-A	178.79	2.02802	0.303989	6.67134	2.53473e-11	1.98359e-10
FBgn0015774	NetB	Netrin-B	701.376	1.76441	0.296231	5.95621	2.58159e-09	1.5405e-08
FBgn0015776	nrv1	nervana 1	7811.46	1.85882	0.125784	14.7779	2.03392e-49	3.54876e-47
FBgn0015777	nrv2	nervana 2	1681.48	1.86431	0.183382	10.1663	2.80411e-24	8.9993e-23
FBgn0015793	Rab19	Rab19	346.846	0.419484	0.156094	2.68738	0.00720144	0.014645
FBgn0015794	Rab18	Rab18	786.32	0.620049	0.175065	3.54182	0.000397382	0.00105008
FBgn0015795	Rab7	Rab7	3124.34	0.485182	0.0740782	6.54959	5.76955e-11	4.33697e-10
FBgn0015797	Rab6	Rab6	2009.34	0.366347	0.111924	3.27317	0.00106347	0.00257814
FBgn0015801	Reg-5	Rhythmically expressed gene 5	741.453	2.16561	0.148842	14.5497	5.86526e-48	8.86084e-46
FBgn0015803	RtGEF	Rho-type guanine nucleotide exchange factor	1607.08	0.425652	0.128409	3.3148	0.000917076	0.00225233
FBgn0015808	ScpX	Sterol carrier protein X-related thiolase	1550.84	0.447384	0.101418	4.41127	1.02765e-05	3.5901e-05
FBgn0015872	Drip	drip	1668.95	1.72449	0.305838	5.63857	1.7147e-08	9.14015e-08
FBgn0015924	crq	croquemort	2092.34	1.01481	0.112943	8.98512	2.58447e-19	5.27453e-18
FBgn0016013	Faa	Fumarylacetoacetase	55.0439	1.23942	0.241911	5.12344	3.00009e-07	1.33784e-06
FBgn0016031	lama	lamina ancestor	3720.5	0.646403	0.158611	4.0754	4.59361e-05	0.000144211
FBgn0016032	lbm	late bloomer	387.009	2.75181	0.227098	12.1173	8.55305e-34	5.37844e-32
FBgn0016059	Sema1b	Semaphorin 1b	3706.86	0.466315	0.149982	3.10914	0.00187633	0.00432769
FBgn0016061	side	sidestep	88.9004	3.57307	0.415794	8.59338	8.44492e-18	1.5031e-16
FBgn0016076	vri	vrille	873.259	1.13928	0.34593	3.29338	0.000989905	0.00241634
FBgn0016078	wun	wunen	551.272	0.51704	0.111863	4.62208	3.79917e-06	1.43052e-05
FBgn0016081	fry	furry	2271.53	0.716257	0.310151	2.30938	0.0209226	0.0384497
FBgn0016122	Acer	Angiotensin-converting enzyme-related	1098.83	0.9616	0.101874	9.43915	3.75799e-21	9.02209e-20
FBgn0016123	Alp4	Alkaline phosphatase 4	8886.18	4.2572	0.34326	12.4023	2.54053e-35	1.7984e-33
FBgn0016650	Lgr1	Leucine-rich repeat-containing G protein-coupled receptor 1	43.7195	0.751103	0.295501	2.5418	0.0110284	0.0215252
FBgn0016672	Ipp	Inositol polyphosphate 1-phosphatase	1411.82	0.537367	0.138441	3.88157	0.000103783	0.000306112
FBgn0016675	Lectin-galC1	Galactose-specific C-type lectin	106.409	1.50926	0.568521	2.65472	0.00793745	0.0160094
FBgn0016684	NaPi-T	Na[+]-dependent inorganic phosphate cotransporter	1854.69	2.47619	0.432065	5.73106	9.98063e-09	5.4443e-08
FBgn0016693	Past1	Putative Achaete Scute Target 1	4047.07	1.41784	0.0601556	23.5696	7.91145e-123	2.45017e-119
FBgn0016694	Pdp1	PAR-domain protein 1	3529.55	0.589609	0.192335	3.06553	0.00217283	0.00494163
FBgn0016715	Reg-2	Rhythmically expressed gene 2	136.608	1.95774	0.226867	8.62944	6.16514e-18	1.11657e-16
FBgn0016756	Usp47	Ubiquitin specific protease 47	6418.34	0.827511	0.138689	5.96667	2.42149e-09	1.45055e-08
FBgn0016797	fz2	frizzled 2	4218.8	1.93069	0.345209	5.59281	2.2342e-08	1.17376e-07
FBgn0016926	Pino	Pinocchio	4130.11	0.394653	0.128386	3.07397	0.00211233	0.0048173
FBgn0016930	Dyrk2	Dual-specificity tyrosine phosphorylation-regulated kinase 2	2097.21	1.21101	0.174042	6.95815	3.4476e-12	3.05937e-11
FBgn0016984	sktl	skittles	3228.45	0.474632	0.104693	4.53355	5.79998e-06	2.11947e-05
FBgn0017448	CG2187	uncharacterized protein	907.733	1.79147	0.333671	5.36897	7.91875e-08	3.84394e-07
FBgn0017456	Ubc84D	Ubiquitin conjugating enzyme 84D	4.20223	3.7868	1.04175	3.63504	0.000277941	0.0007589
FBgn0017482	T3dh	Type III alcohol dehydrogenase	438.806	0.499123	0.117204	4.25859	2.05721e-05	6.86366e-05
FBgn0017558	Pdk	Pyruvate dehydrogenase kinase	1236.64	0.659839	0.137946	4.78332	1.72424e-06	6.89028e-06
FBgn0017590	klg	klingon	5.00404	2.77518	1.0223	2.71463	0.00663501	0.0136058
FBgn0019643	AANAT1	Arylalkylamine N-acetyltransferase 1	1441.17	2.08129	0.304316	6.83924	7.96127e-12	6.72285e-11
FBgn0019650	toy	twin of eyeless	21.0534	1.16798	0.373602	3.12626	0.00177045	0.00410794
FBgn0019662	qm	quemao	1293.12	0.366401	0.0993677	3.68733	0.000226619	0.000628184
FBgn0019830	colt	congested-like trachea	1730.44	0.512967	0.116749	4.39374	1.11416e-05	3.86833e-05
FBgn0019929	Ser7	Ser7	113.155	1.32851	0.458702	2.89623	0.00377676	0.0081766
FBgn0019952	Orct	Organic cation transporter	158.957	1.78706	0.169049	10.5712	4.05089e-26	1.48031e-24
FBgn0019972	Drice	Death related ICE-like caspase	994.139	0.176834	0.0772996	2.28764	0.0221584	0.0404507
FBgn0019982	Gs1l	GS1-like	1536.27	0.3477	0.129352	2.68802	0.00718775	0.014621
FBgn0020249	stck	steamer duck	2420.48	1.06318	0.113565	9.36188	7.8327e-21	1.82048e-19
FBgn0020257	Ppa	Partner of paired	930.938	0.938505	0.26719	3.5125	0.000443916	0.00116164
FBgn0020269	mspo	M-spondin	750.567	2.79248	0.184273	15.154	7.12508e-52	1.44697e-49
FBgn0020277	lush	lush	3.63142	5.06028	1.01379	4.99145	5.99265e-07	2.55385e-06
FBgn0020278	loco	locomotion defects	1502.18	0.541961	0.112104	4.83444	1.33522e-06	5.42851e-06
FBgn0020294	ko	knockout	1169.63	1.44165	0.217011	6.64324	3.0686e-11	2.37586e-10
FBgn0020299	stumps	stumps	1122.12	2.1948	0.329575	6.65947	2.74821e-11	2.13984e-10
FBgn0020300	geko	geko	59.7232	1.36901	0.275812	4.96357	6.92092e-07	2.92316e-06
FBgn0020307	dve	defective proventriculus	29.9307	2.83401	1.09297	2.59294	0.00951601	0.0188555
FBgn0020372	TM4SF	Transmembrane 4 superfamily	257.397	1.80204	0.238195	7.56538	3.86726e-14	4.44e-13
FBgn0020376	Sr-CIII	Scavenger receptor class C, type III	31.8117	6.7889	0.796807	8.52014	1.59367e-17	2.76892e-16
FBgn0020381	Dredd	Death related ced-3/Nedd2-like caspase	672.794	0.470939	0.203601	2.31305	0.02072	0.0381057
FBgn0020385	pug	pugilist	1055.61	0.587664	0.265144	2.21639	0.0266646	0.0478276
FBgn0020388	Gcn5	Gcn5 acetyltransferase	1004.06	0.250919	0.0880586	2.84946	0.00437934	0.0093569
FBgn0020414	Idgf3	Imaginal disc growth factor 3	935.081	1.06261	0.31898	3.33126	0.000864531	0.00213897
FBgn0020415	Idgf2	Imaginal disc growth factor 2	1243.76	1.3126	0.196084	6.69409	2.17019e-11	1.71566e-10
FBgn0020416	Idgf1	Imaginal disc growth factor 1	377.515	1.34317	0.36279	3.70234	0.000213623	0.00059442
FBgn0020429	GluRIIB	Glutamate receptor IIB	54.2956	3.00256	0.296394	10.1303	4.05469e-24	1.28137e-22
FBgn0020493	Dad	Daughters against dpp	1011.26	1.80648	0.197322	9.15502	5.43484e-20	1.1791e-18
FBgn0020503	CLIP-190	Cytoplasmic linker protein 190	3153.86	1.17967	0.140269	8.41006	4.09795e-17	6.90686e-16
FBgn0020510	Abi	Abelson interacting protein	1804.47	0.408185	0.0958648	4.25793	2.06328e-05	6.88205e-05
FBgn0020521	pio	piopio	1624.83	3.19189	0.151662	21.0461	2.48479e-98	3.42017e-95
FBgn0020545	kraken	kraken	1062.89	0.399388	0.13187	3.02866	0.00245643	0.00551672
FBgn0020626	Osbp	Oxysterol binding protein	1995.18	0.836268	0.275262	3.03808	0.00238094	0.00536079
FBgn0020762	Atet	ABC transporter expressed in trachea	1129.68	1.08054	0.0861047	12.5492	4.01548e-36	3.05177e-34
FBgn0020765	Acp65Aa	Adult cuticle protein 65Aa	151.315	5.02774	0.547511	9.1829	4.19638e-20	9.20085e-19
FBgn0020907	Scp2	Sarcoplasmic calcium-binding protein 2	834.398	3.74388	0.485779	7.70695	1.28859e-14	1.58678e-13
FBgn0020912	Ptx1	Ptx1	119.378	2.9401	0.776371	3.78698	0.000152486	0.000436662
FBgn0021767	org-1	optomotor-blind-related-gene-1	10.1519	3.21128	0.714527	4.49427	6.98093e-06	2.51249e-05
FBgn0021814	Vps28	Vacuolar protein sorting 28	665.583	0.363229	0.108025	3.36245	0.000772544	0.00193183
FBgn0021825	DCTN2-p50	Dynactin 2, p50 subunit	1724.49	0.663016	0.0875587	7.57225	3.66803e-14	4.21909e-13
FBgn0021872	Xbp1	X box binding protein-1	7444.42	0.948258	0.315226	3.00818	0.00262816	0.00586836
FBgn0021906	RFeSP	Rieske iron-sulfur protein	4845.88	0.433399	0.163501	2.65074	0.00803151	0.0161858
FBgn0021979	l(2)k09913	lethal (2) k09913	3361.29	1.33868	0.161603	8.28375	1.19357e-16	1.88117e-15
FBgn0022097	Vha36-1	Vacuolar H[+] ATPase 36kD subunit 1	3478.44	0.985628	0.138244	7.12965	1.00622e-12	9.65533e-12
FBgn0022160	Gpo1	Glycerophosphate oxidase 1	3070.12	2.56684	0.32198	7.97204	1.56079e-15	2.16518e-14
FBgn0022355	Tsf1	Transferrin 1	2663.9	2.0938	0.509794	4.10714	4.00587e-05	0.000127145
FBgn0022361	Pur-alpha	Purine-rich binding protein-alpha	1131.57	0.743979	0.182063	4.08637	4.38173e-05	0.000138436
FBgn0022382	Pka-R2	Protein kinase, cAMP-dependent, regulatory subunit type 2	5330.33	0.68483	0.177123	3.8664	0.000110452	0.000323777
FBgn0022709	Adk1	Adenylate kinase 1	820.571	0.871057	0.154198	5.64894	1.61437e-08	8.63136e-08
FBgn0022710	Ac13E	Adenylyl cyclase 13E	1193.61	0.994448	0.364344	2.72942	0.00634457	0.0130624
FBgn0022770	Peritrophin-A	Peritrophin A	49.1682	0.772321	0.301902	2.55819	0.0105219	0.0206536
FBgn0022800	Cad96Ca	Cadherin 96Ca	60.2846	1.79352	0.379994	4.71988	2.35983e-06	9.24235e-06
FBgn0023000	mth	methuselah	809.75	0.926345	0.188322	4.91893	8.70171e-07	3.64301e-06
FBgn0023023	CRMP	Collapsin Response Mediator Protein	1057.76	1.49753	0.242608	6.17262	6.71677e-10	4.34503e-09
FBgn0023081	gek	genghis khan	2091.8	0.350074	0.154297	2.26884	0.0232783	0.0422894
FBgn0023083	fray	frayed	1230.29	0.734701	0.167882	4.37628	1.2072e-05	4.17267e-05
FBgn0023095	caps	capricious	1850.05	1.03491	0.18398	5.6251	1.854e-08	9.83494e-08
FBgn0023169	AMPKalpha	AMP-activated protein kinase alpha subunit	2002.24	1.10054	0.311053	3.53813	0.000402979	0.00106396
FBgn0023179	amon	amontillado	16.132	2.58781	0.45372	5.70353	1.17353e-08	6.36222e-08
FBgn0023197	Jon74E	Jonah 74E	1.83072	2.86321	1.14308	2.50481	0.0122517	0.0237184
FBgn0023477	Taldo	Transaldolase	6292.87	0.431969	0.10896	3.96449	7.35527e-05	0.000222998
FBgn0023479	teq	Tequila	1017.21	1.5992	0.209116	7.64743	2.05037e-14	2.46363e-13
FBgn0023507	D2hgdh	D-2-hydroxyglutaric acid dehydrogenase	2421.09	2.01144	0.257477	7.81209	5.62454e-15	7.25045e-14
FBgn0023525	CG3191	uncharacterized protein	1421.83	2.86195	0.157502	18.1709	8.78079e-74	3.75091e-71
FBgn0023535	arg	arginase	116.623	2.29741	0.345048	6.65823	2.77145e-11	2.15387e-10
FBgn0023537	CG17896	uncharacterized protein	8391.42	0.289833	0.108921	2.66096	0.00779193	0.0157568
FBgn0023540	CG3630	uncharacterized protein	702.745	1.28201	0.26745	4.79347	1.6392e-06	6.57167e-06
FBgn0023541	Cyp4d14	Cyp4d14	28.6504	1.10225	0.469113	2.34964	0.0187915	0.0349271
FBgn0023550	FarO	Fatty acyl-CoA reductase in oenocytes	103.003	1.86363	0.35211	5.29273	1.20502e-07	5.68029e-07
FBgn0024150	Ac78C	Adenylyl cyclase 78C	169.423	1.58692	0.352264	4.50492	6.63993e-06	2.40092e-05
FBgn0024179	wit	wishful thinking	533.929	1.54321	0.16877	9.14389	6.02431e-20	1.2979e-18
FBgn0024183	vig	vasa intronic gene	6451.65	0.476893	0.107471	4.43741	9.10462e-06	3.2115e-05
FBgn0024189	sns	sticks and stones	12.2996	1.9746	0.457631	4.31483	1.59727e-05	5.41663e-05
FBgn0024232	gprs	gprs	2.69984	2.74454	1.13411	2.41999	0.0155208	0.0293858
FBgn0024234	gbb	glass bottom boat	1418.93	1.6372	0.224143	7.30425	2.78819e-13	2.87356e-12
FBgn0024244	drm	drumstick	62.5737	2.78558	0.569021	4.89539	9.81129e-07	4.0704e-06
FBgn0024245	dnt	doughnut on 2	880.18	0.989553	0.178342	5.54862	2.8794e-08	1.49623e-07
FBgn0024277	trio	trio	3852.7	1.494	0.197238	7.5746	3.60249e-14	4.15528e-13
FBgn0024289	Sodh-1	Sorbitol dehydrogenase 1	623.576	1.64558	0.423323	3.88729	0.000101369	0.000299633
FBgn0024293	Spn43Ab	Serpin 43Ab	269.915	1.8221	0.257664	7.07162	1.53136e-12	1.43566e-11
FBgn0024294	Spn43Aa	Serpin 43Aa	27.9311	1.39662	0.40901	3.41465	0.000638648	0.00162356
FBgn0024315	Picot	picot	2800.34	2.16168	0.192993	11.2008	4.04154e-29	1.85432e-27
FBgn0024320	Npc1a	Niemann-Pick type C-1a	3116.01	0.898108	0.139456	6.44007	1.19422e-10	8.52678e-10
FBgn0024321	NK7.1	NK7.1	1011.26	1.29251	0.168853	7.65465	1.93845e-14	2.33367e-13
FBgn0024361	Tsp2A	Tetraspanin 2A	188.123	2.65517	0.484735	5.47757	4.31206e-08	2.18478e-07
FBgn0024754	Flo1	Flotillin 1	2182.08	1.65005	0.103997	15.8664	1.08263e-56	2.39492e-54
FBgn0024807	DIP1	DISCO Interacting Protein 1	3584.27	0.588012	0.22789	2.58024	0.00987307	0.0195255
FBgn0024833	AP-1mu	Adaptor Protein complex 1, mu subunit	1637.21	0.216624	0.0689409	3.14217	0.00167699	0.00390278
FBgn0024836	stan	starry night	115.399	2.6974	0.461937	5.83934	5.2409e-09	2.97273e-08
FBgn0024897	b6	b6	12.5264	2.03759	0.780551	2.61045	0.00904224	0.018006
FBgn0024941	RSG7	Regulator of G-protein signaling 7	8.02514	1.85736	0.729515	2.54602	0.0108959	0.0212899
FBgn0024943	PIP82	PIP82	27.3194	2.17436	0.637713	3.40963	0.000650515	0.00165
FBgn0024944	Oamb	Octopamine receptor in mushroom bodies	335.139	3.93836	0.172877	22.7812	7.03617e-115	1.45274e-111
FBgn0024947	NTPase	NTPase	1347.22	0.856413	0.115086	7.44153	9.95285e-14	1.07682e-12
FBgn0024957	Irp-1B	Iron regulatory protein 1B	1817.49	0.751321	0.111234	6.75444	1.43386e-11	1.16553e-10
FBgn0024963	GluClalpha	GluClalpha	11.6247	2.54763	0.844373	3.01718	0.00255137	0.00570924
FBgn0024980	Syx4	Syntaxin 4	203.468	1.86916	0.188913	9.89427	4.40831e-23	1.25842e-21
FBgn0024985	Rilpl	Rab interacting lysosomal protein like	1534.07	0.764435	0.1253	6.10086	1.055e-09	6.62743e-09
FBgn0024986	CG3719	uncharacterized protein	771.866	0.748757	0.12932	5.78993	7.04154e-09	3.92224e-08
FBgn0024989	CG3777	uncharacterized protein	141.839	1.89523	0.255251	7.42496	1.1281e-13	1.21205e-12
FBgn0024994	Ugalt	UDP-galactose transporter	605.311	0.34202	0.138413	2.47101	0.0134732	0.0258608
FBgn0024995	CG2680	uncharacterized protein	1199.74	2.62533	0.443989	5.91306	3.3581e-09	1.97344e-08
FBgn0024997	CG2681	uncharacterized protein	162.525	3.03997	0.595826	5.1021	3.35896e-07	1.48983e-06
FBgn0025109	Bem46	Bem46	758.56	0.281578	0.106886	2.63437	0.00842933	0.016933
FBgn0025111	Ant2	Adenine nucleotide translocase 2	397.66	0.824405	0.262354	3.14234	0.00167602	0.003902
FBgn0025352	Thiolase	thiolase	3085.76	0.880202	0.209479	4.20186	2.64729e-05	8.68503e-05
FBgn0025381	rush	rush hour	1880.86	0.943183	0.150708	6.25836	3.89037e-10	2.60931e-09
FBgn0025383	CG14780	uncharacterized protein	4.21053	1.74844	0.700135	2.49729	0.0125147	0.0241859
FBgn0025391	Scgdelta	Sarcoglycan delta	473.281	2.41496	0.166117	14.5377	6.99351e-48	1.0438e-45
FBgn0025393	CG14795	uncharacterized protein	7.81633	3.25153	0.828499	3.92461	8.68716e-05	0.000259818
FBgn0025454	Cyp6g1	Cyp6g1	1321.74	2.66046	0.462942	5.74685	9.09215e-09	4.99484e-08
FBgn0025456	CREG	Cellular Repressor of E1A-stimulated Genes	357.156	0.550833	0.202292	2.72297	0.00646982	0.0132938
FBgn0025525	bab2	bric a brac 2	770.746	2.4807	0.421326	5.88785	3.91263e-09	2.27131e-08
FBgn0025558	CG4101	uncharacterized protein	234.138	0.75167	0.211792	3.54909	0.000386563	0.00102433
FBgn0025595	AkhR	Adipokinetic hormone receptor	49.3514	2.11285	0.312779	6.75508	1.42755e-11	1.16193e-10
FBgn0025620	CG13360	uncharacterized protein	76.2217	3.25968	0.496164	6.56976	5.03978e-11	3.81619e-10
FBgn0025624	CG4025	uncharacterized protein	312.91	0.903949	0.166423	5.43165	5.5836e-08	2.77233e-07
FBgn0025625	Sik2	Salt-inducible kinase 2	214.2	2.62979	0.377537	6.96566	3.26869e-12	2.91313e-11
FBgn0025628	CG4199	uncharacterized protein	1306.43	0.923237	0.0926378	9.96609	2.14502e-23	6.2968e-22
FBgn0025631	moody	moody	649.127	1.74071	0.224742	7.74536	9.53129e-15	1.19387e-13
FBgn0025632	CG4313	uncharacterized protein	710.447	2.07317	0.192699	10.7586	5.39949e-27	2.11006e-25
FBgn0025680	cry	cryptochrome	1375.8	0.873384	0.212578	4.10853	3.9819e-05	0.000126449
FBgn0025683	CG3164	uncharacterized protein	6436.93	1.33945	0.113073	11.8458	2.26128e-32	1.26755e-30
FBgn0025686	Amnionless	amnionless	6.72587	2.79164	0.782468	3.56773	0.000360083	0.000958879
FBgn0025692	Lfg	Lifeguard	150.251	2.03273	0.487332	4.17114	3.03082e-05	9.83132e-05
FBgn0025693	ZnT41F	Zinc transporter 41F	478.101	1.17806	0.166891	7.05887	1.67857e-12	1.56701e-11
FBgn0025697	santa-maria	scavenger receptor acting in neural tissue and majority of rhodopsin is absent	175.08	1.95363	0.261904	7.45934	8.69599e-14	9.49964e-13
FBgn0025702	Srpk79D	Serine-arginine protein kinase at 79D	183.383	1.34438	0.197485	6.80753	9.92852e-12	8.27132e-11
FBgn0025709	CNT2	Concentrative nucleoside transporter 2	94.0881	3.37059	0.538641	6.25757	3.91015e-10	2.61832e-09
FBgn0025712	CG13920	uncharacterized protein	357.976	1.73397	0.186935	9.2758	1.7629e-20	4.00712e-19
FBgn0025725	alphaCOP	Coat Protein (coatomer) alpha	4207.49	0.31232	0.121857	2.563	0.0103772	0.0203955
FBgn0025726	unc-13	unc-13	5867.9	1.12264	0.337894	3.32245	0.000892303	0.00220109
FBgn0025742	mtm	myotubularin	1628.09	0.347144	0.0946284	3.66849	0.000243984	0.000673006
FBgn0025802	Sbf	SET domain binding factor	1139.15	0.560976	0.213838	2.62338	0.00870633	0.0174155
FBgn0025814	Mgstl	Microsomal glutathione S-transferase-like	1282.59	1.74679	0.203283	8.59292	8.47883e-18	1.50697e-16
FBgn0025837	CG17636	uncharacterized protein	18.464	1.9844	0.531867	3.73102	0.000190708	0.000535711
FBgn0025865	Cortactin	cortactin	1869.04	0.621775	0.0930768	6.68024	2.38552e-11	1.87393e-10
FBgn0025866	CalpB	Calpain-B	2156.22	0.831436	0.106368	7.81662	5.42627e-15	7.00214e-14
FBgn0025879	Timp	Tissue inhibitor of metalloproteases	2890.11	1.3601	0.135913	10.0071	1.41785e-23	4.284e-22
FBgn0025885	Inos	myo-inositol-1-phosphate synthase	9860.29	2.17942	0.267977	8.13285	4.19308e-16	6.21338e-15
FBgn0026059	Mhcl	Myosin heavy chain-like	3627.62	2.06262	0.271108	7.60811	2.78139e-14	3.30354e-13
FBgn0026061	Mipp1	Multiple inositol polyphosphate phosphatase 1	7496.91	1.56638	0.121287	12.9146	3.72181e-38	3.24689e-36
FBgn0026063	KP78b	KP78b	78.0343	1.10512	0.337295	3.27642	0.00105131	0.00255015
FBgn0026064	KP78a	KP78a	74.9913	1.10802	0.388024	2.85553	0.00429645	0.00919564
FBgn0026077	Gasp	gasp	2593.43	2.53133	0.169134	14.9664	1.21719e-50	2.39341e-48
FBgn0026084	cib	ciboulot	6458.28	1.36731	0.141044	9.69424	3.19006e-22	8.3022e-21
FBgn0026088	CG14818	uncharacterized protein	705.745	1.29216	0.243682	5.30264	1.14137e-07	5.40906e-07
FBgn0026160	tna	tonalli	1831.52	1.79928	0.455588	3.94937	7.8358e-05	0.00023618
FBgn0026175	SkpC	SKP1-related C	26.4501	1.45924	0.472708	3.08699	0.00202198	0.00462571
FBgn0026190	PH4alphaMP	prolyl-4-hydroxylase-alpha MP	2.37259	3.46085	1.27204	2.72071	0.00651427	0.0133776
FBgn0026199	myo	myoglianin	1850.95	0.575297	0.202649	2.83889	0.00452714	0.00964771
FBgn0026255	clumsy	clumsy	278.014	2.34682	0.257724	9.10593	8.55271e-20	1.80804e-18
FBgn0026314	Ugt35B1	UDP-glycosyltransferase family 35 member B1	506.583	2.54643	0.431179	5.90574	3.51071e-09	2.05532e-08
FBgn0026315	Ugt35A1	UDP-glycosyltransferase family 35 member A1	194.831	1.24242	0.28229	4.40121	1.07647e-05	3.74798e-05
FBgn0026320	Tom	Twin of m4	6.19894	2.59744	0.719331	3.61091	0.000305127	0.000825489
FBgn0026323	Tak1	TGF-beta activated kinase 1	1837.06	0.605232	0.0987766	6.12728	8.93924e-10	5.66731e-09
FBgn0026374	Rhp	Rhophilin	174.494	1.57296	0.24936	6.30801	2.82652e-10	1.92707e-09
FBgn0026376	Rgl	Ral guanine nucleotide dissociation stimulator-like	1549.22	1.17791	0.205189	5.74061	9.43365e-09	5.17098e-08
FBgn0026378	Rep	Rab escort protein	439.144	0.401203	0.144627	2.77406	0.00553621	0.0115634
FBgn0026388	Or46a	Odorant receptor 46a	4.76662	5.03319	0.999602	5.0352	4.77353e-07	2.06836e-06
FBgn0026403	Ndg	Nidogen/entactin	195	2.70096	0.238246	11.3369	8.61888e-30	4.1384e-28
FBgn0026404	Dronc	Death regulator Nedd2-like caspase	978.085	0.486669	0.177197	2.74649	0.00602376	0.0124724
FBgn0026411	Lim1	LIM homeobox 1	31.8982	1.25878	0.318491	3.95233	7.73941e-05	0.000233502
FBgn0026415	Idgf4	Imaginal disc growth factor 4	4576.06	2.02199	0.15286	13.2278	6.06625e-40	6.15973e-38
FBgn0026439	Eaat1	Excitatory amino acid transporter 1	402.808	1.78793	0.274511	6.51316	7.35859e-11	5.43579e-10
FBgn0026562	SPARC	Secreted protein, acidic, cysteine-rich	9614.39	1.69205	0.216324	7.82184	5.20568e-15	6.73152e-14
FBgn0026563	CG1979	uncharacterized protein	19.6171	1.49754	0.550906	2.71832	0.00656136	0.013464
FBgn0026565	Ass	Argininosuccinate synthase	86.5226	2.85329	0.452941	6.29949	2.98634e-10	2.03045e-09
FBgn0026570	CG5704	uncharacterized protein	128.328	0.735002	0.234921	3.12873	0.00175566	0.00407668
FBgn0026592	Fie	Fire exit	116.125	4.41656	0.4576	9.65158	4.84064e-22	1.23641e-20
FBgn0026593	CG5707	uncharacterized protein	192.775	0.737605	0.173624	4.24829	2.15405e-05	7.1713e-05
FBgn0026619	Taz	Tafazzin	826.104	0.402366	0.115714	3.47724	0.000506611	0.00131377
FBgn0026713	l(1)G0007	lethal (1) G0007	2741.2	0.970068	0.396499	2.44658	0.0144218	0.027473
FBgn0026721	fat-spondin	fat-spondin	1873.82	2.11592	0.286653	7.38149	1.56524e-13	1.65728e-12
FBgn0026749	Yippee	yippee	630.024	0.219741	0.0908372	2.41906	0.0155606	0.0294568
FBgn0026755	Ugt37B1	UDP-glycosyltransferase family 37 member B1	22.3049	3.27435	0.765855	4.27543	1.90772e-05	6.40111e-05
FBgn0026760	Tehao	tehao	12.6537	3.08006	0.890397	3.4592	0.000541785	0.00139484
FBgn0026787	Nhe1	Na[+]/H[+] hydrogen exchanger 1	777.402	0.499448	0.12197	4.09483	4.22475e-05	0.000133784
FBgn0026872	CG14777	uncharacterized protein	648.951	1.51229	0.136397	11.0874	1.44396e-28	6.45767e-27
FBgn0027070	Ugt36E1	UDP-glycosyltransferase family 36 member E1	614.082	1.26431	0.166496	7.59362	3.11098e-14	3.67036e-13
FBgn0027073	Ugt49B1	UDP-glycosyltransferase family 49 member B1	315.944	2.10567	0.21386	9.84605	7.12912e-23	1.97574e-21
FBgn0027335	Rip11	Rab11 interacting protein	2301.54	0.558122	0.211649	2.63701	0.00836393	0.0168147
FBgn0027339	jim	jim	2234.63	0.926436	0.354887	2.61051	0.0090408	0.018006
FBgn0027356	Amph	Amphiphysin	3094.93	1.06509	0.123564	8.61974	6.71079e-18	1.20833e-16
FBgn0027363	Stam	Signal transducing adaptor molecule	1151.33	0.789011	0.11178	7.05858	1.6821e-12	1.56912e-11
FBgn0027491	Cdk5alpha	Cdk5 activator-like protein	17.0368	0.856037	0.358484	2.38793	0.0169435	0.0317675
FBgn0027494	RpS10a	Ribosomal protein S10a	72.3531	1.77204	0.400379	4.4259	9.60401e-06	3.37038e-05
FBgn0027515	CG7115	uncharacterized protein	1218.51	0.265445	0.093354	2.84343	0.00446313	0.00952114
FBgn0027527	Osi6	Osiris 6	3.68253	6.34006	1.42664	4.44406	8.82789e-06	3.12457e-05
FBgn0027544	CG2217	uncharacterized protein	17.9781	1.46243	0.558797	2.6171	0.00886805	0.0177092
FBgn0027547	CG1927	uncharacterized protein	1428.48	0.442016	0.0857349	5.15561	2.528e-07	1.14004e-06
FBgn0027550	CG6495	uncharacterized protein	50.4892	2.53444	0.375889	6.74253	1.55653e-11	1.26028e-10
FBgn0027554	CG8042	uncharacterized protein	1115.68	0.284227	0.112413	2.52841	0.0114581	0.0223041
FBgn0027556	CG4928	uncharacterized protein	2968.07	2.67823	0.397725	6.73388	1.65194e-11	1.33491e-10
FBgn0027560	Tps1	Trehalose-6-phosphate synthase 1	3791.04	2.34043	0.364037	6.42911	1.28355e-10	9.12255e-10
FBgn0027563	CG9631	uncharacterized protein	38.262	1.64602	0.41078	4.00706	6.14785e-05	0.000188701
FBgn0027569	cert	ceramide transfer protein	1542.02	0.783919	0.10842	7.23042	4.81499e-13	4.79486e-12
FBgn0027570	Nep2	Neprilysin 2	734.039	2.29581	0.175071	13.1136	2.75148e-39	2.66291e-37
FBgn0027572	CG5009	uncharacterized protein	738.984	0.355674	0.135597	2.62302	0.00871547	0.0174281
FBgn0027578	Nepl21	Neprilysin-like 21	634.422	1.6606	0.557768	2.97723	0.00290865	0.0064447
FBgn0027580	PCB	Pyruvate carboxylase	4890.14	1.02779	0.375155	2.73964	0.00615072	0.0127077
FBgn0027584	CG4757	uncharacterized protein	68.0872	1.46912	0.619127	2.37289	0.0176493	0.0329535
FBgn0027585	CG8740	uncharacterized protein	752.903	3.31229	0.438459	7.55438	4.20847e-14	4.80946e-13
FBgn0027586	CG5867	uncharacterized protein	2635.28	2.77852	0.294904	9.42178	4.43508e-21	1.05051e-19
FBgn0027588	GCS2alpha	Glucosidase 2 alpha subunit	9394.25	0.446105	0.0858836	5.1943	2.05496e-07	9.37982e-07
FBgn0027589	CG1688	uncharacterized protein	1.08702	4.09617	1.8316	2.23639	0.0253263	0.0456419
FBgn0027590	GstE12	Glutathione S transferase E12	4519.95	1.37046	0.141866	9.66025	4.44781e-22	1.14314e-20
FBgn0027594	drpr	draper	3855.84	0.444838	0.157938	2.81654	0.00485447	0.0102851
FBgn0027596	Kank	kank	3068.71	1.20511	0.372961	3.23119	0.00123276	0.00294588
FBgn0027598	cindr	CIN85 and CD2AP related	2332.62	0.717362	0.17005	4.21854	2.45892e-05	8.12947e-05
FBgn0027601	pdgy	pudgy	1584.61	0.619915	0.156033	3.97297	7.0982e-05	0.000215785
FBgn0027608	CG2082	uncharacterized protein	182.28	2.00526	0.325609	6.1585	7.34375e-10	4.71859e-09
FBgn0027654	jdp	jdp	78.4333	0.884927	0.238078	3.71695	0.00020164	0.00056399
FBgn0027657	glob1	globin 1	2816.07	0.911174	0.185825	4.90341	9.41892e-07	3.9168e-06
FBgn0027779	VhaSFD	Vacuolar H[+]-ATPase SFD subunit	5612.8	1.29212	0.10945	11.8055	3.65408e-32	2.02084e-30
FBgn0027790	GV1	GV1	307.888	3.72058	0.260031	14.3082	1.94418e-46	2.73688e-44
FBgn0027793	CG14787	uncharacterized protein	90.503	0.800681	0.282069	2.8386	0.00453125	0.00965315
FBgn0027836	Dgp-1	Dgp-1	831.797	0.501966	0.135079	3.7161	0.000202325	0.000565651
FBgn0027843	CAH2	Carbonic anhydrase 2	682.308	0.609849	0.263213	2.31694	0.0205068	0.0377695
FBgn0027844	CAH1	Carbonic anhydrase 1	603.512	2.99291	0.393383	7.60813	2.78097e-14	3.30354e-13
FBgn0027865	Tsp96F	Tetraspanin 96F	923.276	0.850267	0.215596	3.94381	8.01988e-05	0.000241259
FBgn0027929	NimB1	Nimrod B1	37.9863	2.55756	0.41688	6.13499	8.51628e-10	5.41301e-09
FBgn0027930	MP1	Melanization Protease 1	490.289	1.05297	0.152889	6.8871	5.69396e-12	4.9292e-11
FBgn0028371	jbug	jitterbug	2490.79	1.07597	0.351577	3.06042	0.00221026	0.00501754
FBgn0028379	fan	farinelli	18.154	2.45711	0.323638	7.59216	3.14625e-14	3.7014e-13
FBgn0028381	Decay	Death executioner caspase related to Apopain/Yama	197.373	2.88976	0.766586	3.76965	0.00016348	0.000465881
FBgn0028394	CG17834	uncharacterized protein	468.712	0.220917	0.0811796	2.72134	0.00650185	0.0133574
FBgn0028396	TotA	Turandot A	128.272	2.94536	0.399914	7.36498	1.77167e-13	1.8568e-12
FBgn0028399	TMS1	TMS1	1746.22	0.883105	0.0784086	11.2629	2.0016e-29	9.39238e-28
FBgn0028415	Met75Cb	Met75Cb	7.98467	4.02003	1.44379	2.78436	0.00536335	0.011246
FBgn0028422	GluRIID	Glutamate receptor IID	595.908	3.20593	0.227587	14.0866	4.59196e-45	6.11669e-43
FBgn0028424	JhI-26	Juvenile hormone-inducible protein 26	322.582	1.43961	0.21162	6.80283	1.02585e-11	8.529e-11
FBgn0028427	Ilk	Integrin linked kinase	1898.79	1.33197	0.0926102	14.3825	6.66028e-47	9.5939e-45
FBgn0028430	He	Hemese	10.9355	2.95053	0.540996	5.45389	4.92797e-08	2.47125e-07
FBgn0028468	rtet	tetracycline resistance	567.008	0.779862	0.228796	3.40855	0.000653099	0.00165485
FBgn0028479	Mtpalpha	Mitochondrial trifunctional protein alpha subunit	6973.68	0.41291	0.151483	2.72579	0.00641479	0.0131851
FBgn0028480	CG17841	uncharacterized protein	2139.57	0.900714	0.290339	3.10229	0.00192032	0.00441354
FBgn0028481	CG4341	uncharacterized protein	26.9656	1.92906	0.560098	3.44415	0.000572859	0.00146958
FBgn0028482	bdl	borderless	1308.57	1.46256	0.32548	4.49356	7.00408e-06	2.51935e-05
FBgn0028484	Ack	Activated Cdc42 kinase	1061.39	0.399783	0.175411	2.27913	0.0226596	0.0412692
FBgn0028487	f-cup	flyers-cup	327.125	0.446301	0.155911	2.86255	0.00420253	0.00901274
FBgn0028490	CG31705	uncharacterized protein	2200.32	1.16658	0.290169	4.02033	5.81165e-05	0.000179136
FBgn0028491	CG2930	uncharacterized protein	716.288	2.85786	0.272693	10.4801	1.06599e-25	3.76224e-24
FBgn0028494	CG6424	uncharacterized protein	1769.53	1.189	0.161247	7.3738	1.65828e-13	1.74684e-12
FBgn0028496	CG30116	uncharacterized protein	528.89	2.88229	0.455526	6.32739	2.49347e-10	1.71226e-09
FBgn0028497	CG3530	uncharacterized protein	828.489	0.316584	0.123485	2.56375	0.0103549	0.020358
FBgn0028515	EndoGI	Endonuclease G inhibitor	1624.68	0.509235	0.142645	3.56996	0.000357037	0.000952202
FBgn0028518	CG18480	uncharacterized protein	94.5105	2.51124	0.651083	3.85701	0.000114781	0.000335435
FBgn0028523	CG5888	uncharacterized protein	118.135	1.07389	0.217626	4.93454	8.03384e-07	3.37367e-06
FBgn0028526	CG15293	uncharacterized protein	400.923	1.01482	0.349628	2.90256	0.00370129	0.00802582
FBgn0028527	CG18507	uncharacterized protein	505.263	2.73972	0.155234	17.6489	1.03674e-69	3.77739e-67
FBgn0028533	CG7953	uncharacterized protein	3.18158	3.22762	1.0416	3.09872	0.00194357	0.00446118
FBgn0028537	CG31775	uncharacterized protein	871.811	3.42051	0.805474	4.24659	2.17052e-05	7.2203e-05
FBgn0028539	Eato	Engulfment ABC Transporter in the ovary	2532.05	0.652102	0.174452	3.738	0.00018549	0.000522357
FBgn0028540	CG9008	uncharacterized protein	467.561	0.710429	0.184315	3.85442	0.000116004	0.000338608
FBgn0028541	TM9SF4	Transmembrane 9 superfamily protein member 4	1661.13	0.532146	0.0793288	6.7081	1.97168e-11	1.57176e-10
FBgn0028542	NimB4	Nimrod B4	327.221	2.97273	0.463698	6.41092	1.44648e-10	1.02103e-09
FBgn0028543	NimB2	Nimrod B2	650.084	2.6165	0.319098	8.19968	2.41021e-16	3.66352e-15
FBgn0028546	ics	icarus	1588.17	1.61728	0.188067	8.59952	8.00501e-18	1.42685e-16
FBgn0028550	Atf3	Activating transcription factor 3	1026.01	1.674	0.287897	5.81459	6.07819e-09	3.42881e-08
FBgn0028573	prc	pericardin	162.368	3.6358	0.536744	6.7738	1.25441e-11	1.03116e-10
FBgn0028582	lqf	liquid facets	2522.76	0.509409	0.102274	4.98084	6.33094e-07	2.68772e-06
FBgn0028622	qsm	quasimodo	1098.87	0.560308	0.111385	5.03039	4.89493e-07	2.11579e-06
FBgn0028662	VhaPPA1-1	Vacuolar H[+] ATPase PPA1 subunit 1	5564.19	1.13281	0.146715	7.72114	1.15294e-14	1.42399e-13
FBgn0028663	VhaM9.7-b	Vacuolar H[+] ATPase M9.7 subunit b	2742.87	0.728518	0.237841	3.06304	0.00219099	0.00497836
FBgn0028675	Sur	Sulfonylurea receptor	1339.35	1.96768	0.321339	6.12337	9.1614e-10	5.80222e-09
FBgn0028699	Rh50	Rh50	179.028	2.37479	0.275257	8.62753	6.26884e-18	1.1337e-16
FBgn0028703	Nhe3	Na[+]/H[+] hydrogen exchanger 3	1553.21	0.401076	0.0753063	5.32593	1.00438e-07	4.79102e-07
FBgn0028704	Nckx30C	Nckx30C	17.047	1.60661	0.490022	3.27865	0.00104305	0.00253358
FBgn0028738	ETH	Ecdysis triggering hormone	451.804	1.92552	0.254273	7.57265	3.65691e-14	4.21021e-13
FBgn0028740	CG6362	uncharacterized protein	11.1958	1.25636	0.489306	2.56765	0.0102391	0.0201528
FBgn0028789	Doc1	Dorsocross1	3.7514	2.69262	0.90109	2.98818	0.00280648	0.00623617
FBgn0028841	jhamt	juvenile hormone acid methyltransferase	6.6543	2.9148	0.718939	4.05431	5.02824e-05	0.000156651
FBgn0028852	CG15262	uncharacterized protein	9.52106	4.88582	0.84381	5.79019	7.03056e-09	3.91788e-08
FBgn0028864	CG18477	uncharacterized protein	7.08362	1.2585	0.550854	2.28463	0.0223345	0.0407061
FBgn0028870	CG4691	uncharacterized protein	7.33428	3.00741	1.16163	2.58896	0.00962664	0.0190594
FBgn0028872	CG18095	uncharacterized protein	323.731	3.36338	0.473777	7.09908	1.25591e-12	1.19311e-11
FBgn0028886	CG15279	uncharacterized protein	1037.62	2.37608	0.216896	10.9549	6.29141e-28	2.63304e-26
FBgn0028899	CG31817	uncharacterized protein	55.605	0.882048	0.377984	2.33356	0.0196188	0.0362959
FBgn0028920	CG8997	uncharacterized protein	10.4737	2.91011	0.898518	3.23879	0.00120038	0.00287627
FBgn0028936	NimB5	Nimrod B5	279.42	2.78697	0.218861	12.734	3.82916e-37	3.06037e-35
FBgn0028938	Vajk1	Vajk1	6.55781	2.13648	0.780826	2.73618	0.00621562	0.0128289
FBgn0028939	NimC2	Nimrod C2	179.308	2.35818	0.48879	4.82453	1.4033e-06	5.68666e-06
FBgn0028940	Cyp28a5	Cyp28a5	185.405	2.82246	0.217727	12.9633	1.97574e-38	1.813e-36
FBgn0028949	CG15254	uncharacterized protein	3.43672	4.79246	1.96869	2.43434	0.0149188	0.0283458
FBgn0028950	CG15255	uncharacterized protein	113.468	4.31678	1.68925	2.55545	0.010605	0.0207905
FBgn0028955	CG8788	uncharacterized protein	262.342	0.536339	0.210386	2.54931	0.0107935	0.0211031
FBgn0028968	gammaCOP	Coat Protein (coatomer) gamma	2941.01	0.25801	0.0841293	3.06683	0.00216339	0.00492195
FBgn0028983	Spn55B	Serpin 55B	433.244	1.38511	0.147343	9.40057	5.42696e-21	1.28056e-19
FBgn0028984	Spn88Ea	Serpin 88Ea	1780.51	1.87595	0.153827	12.1952	3.29703e-34	2.13841e-32
FBgn0028990	Spn27A	Serpin 27A	2156.59	2.16214	0.107948	20.0294	3.05289e-89	2.52128e-86
FBgn0029082	hbs	hibris	11.3959	1.88308	0.620845	3.0331	0.00242059	0.00544116
FBgn0029091	Chs2	Chitin synthase 2	98.6488	3.91928	1.23169	3.18203	0.00146247	0.00344301
FBgn0029093	cathD	cathD	5308.48	0.790207	0.155099	5.09485	3.49014e-07	1.54414e-06
FBgn0029095	aru	arouser	1825.48	0.707411	0.195148	3.625	0.000288956	0.000785342
FBgn0029123	SoxN	SoxNeuro	36.3996	2.89574	0.442169	6.54895	5.79441e-11	4.35301e-10
FBgn0029147	NtR	NtR	1229.62	2.37129	0.334769	7.08335	1.40709e-12	1.32758e-11
FBgn0029167	Hml	Hemolectin	1520.89	3.26508	0.522316	6.25117	4.07386e-10	2.71913e-09
FBgn0029506	Tsp42Ee	Tetraspanin 42Ee	14760.1	1.15876	0.149774	7.73674	1.02002e-14	1.26868e-13
FBgn0029507	Tsp42Ed	Tetraspanin 42Ed	1034.77	2.79938	0.256122	10.9299	8.29716e-28	3.42617e-26
FBgn0029508	Tsp42Ea	Tetraspanin 42Ea	2529.81	1.15264	0.19904	5.79098	6.9975e-09	3.90122e-08
FBgn0029518	CG13376	uncharacterized protein	11.2859	2.0897	0.568822	3.67374	0.000239025	0.000660652
FBgn0029521	Or1a	Odorant receptor 1a	4.75559	3.43491	0.733571	4.68245	2.83469e-06	1.09567e-05
FBgn0029526	NA	NA	78.9824	0.905615	0.290536	3.11705	0.00182673	0.00422586
FBgn0029580	CG14778	uncharacterized protein	88.6866	1.68194	0.180594	9.3134	1.238e-20	2.84534e-19
FBgn0029608	CG3091	uncharacterized protein	422.039	2.61497	0.154866	16.8853	5.7688e-64	1.62418e-61
FBgn0029657	CG12535	uncharacterized protein	16.2034	1.90867	0.464466	4.10939	3.96706e-05	0.000126042
FBgn0029708	CG3556	uncharacterized protein	19.9321	0.987017	0.395946	2.4928	0.0126738	0.0244364
FBgn0029709	CHOp24	CHOp24	1893.69	0.427869	0.129351	3.3078	0.000940321	0.00230439
FBgn0029722	CG7024	uncharacterized protein	16.166	0.823931	0.347432	2.37149	0.0177165	0.033073
FBgn0029746	CG15465	uncharacterized protein	47.3872	1.13403	0.302557	3.74817	0.000178127	0.000503109
FBgn0029761	SK	small conductance calcium-activated potassium channel	551.737	1.42585	0.410012	3.47759	0.000505943	0.00131231
FBgn0029762	NAAT1	Nutrient Amino Acid Transporter 1	57.8123	3.07738	0.726296	4.23709	2.26437e-05	7.52239e-05
FBgn0029768	SPR	Sex peptide receptor	99.1188	3.51909	0.564022	6.23928	4.39585e-10	2.91363e-09
FBgn0029769	frma	fra mauro	72.7045	2.11745	0.344163	6.15244	7.62981e-10	4.89477e-09
FBgn0029771	CG12730	uncharacterized protein	693.691	2.47403	0.151312	16.3505	4.31412e-60	1.1134e-57
FBgn0029791	CG4096	uncharacterized protein	34.1579	3.16816	0.531727	5.95825	2.5495e-09	1.52281e-08
FBgn0029799	CG15772	uncharacterized protein	250.972	2.25861	0.198283	11.3908	4.64508e-30	2.29256e-28
FBgn0029804	CG3097	uncharacterized protein	194.33	2.0544	0.211314	9.722	2.42961e-22	6.39024e-21
FBgn0029819	Usp30	Ubiquitin specific protease 30	1096.96	0.649527	0.150201	4.32437	1.52966e-05	5.20447e-05
FBgn0029820	CG16721	uncharacterized protein	1298.66	0.794677	0.102779	7.73188	1.05972e-14	1.31409e-13
FBgn0029821	CG4020	uncharacterized protein	306.531	0.848268	0.271855	3.12029	0.00180672	0.00418506
FBgn0029826	CG6041	uncharacterized protein	98.1762	1.84004	0.464277	3.96324	7.39401e-05	0.000223954
FBgn0029827	CG6048	uncharacterized protein	23.3031	4.30129	1.4263	3.01569	0.00256393	0.00573423
FBgn0029828	CG6067	uncharacterized protein	75.5024	1.73149	0.381435	4.5394	5.64142e-06	2.06458e-05
FBgn0029830	Grip	Glutamate receptor binding protein	648.03	2.65157	0.324691	8.16644	3.17618e-16	4.76927e-15
FBgn0029837	Tsp5D	Tetraspanin 5D	64.2386	1.33924	0.353356	3.79006	0.000150609	0.000431786
FBgn0029848	Btnd	Biotinidase	87.0395	4.54757	0.672259	6.76461	1.33672e-11	1.09447e-10
FBgn0029849	Efr	ER GDP-fucose transporter	1030.35	0.883905	0.129299	6.83612	8.1367e-12	6.86631e-11
FBgn0029880	CG14443	uncharacterized protein	3.23565	2.43172	1.08645	2.23822	0.025207	0.0454665
FBgn0029881	pigs	pickled eggs	912.21	0.957611	0.200251	4.78204	1.73523e-06	6.92974e-06
FBgn0029896	CG3168	uncharacterized protein	9338.65	2.82618	0.415612	6.80005	1.04584e-11	8.68352e-11
FBgn0029898	CG14439	uncharacterized protein	56.8866	0.689601	0.297872	2.31509	0.0206078	0.0379218
FBgn0029930	CG12541	uncharacterized protein	1217.34	2.46053	0.336668	7.30849	2.70161e-13	2.78896e-12
FBgn0029932	CG4607	uncharacterized protein	612.243	3.07056	0.3736	8.21884	2.0548e-16	3.14646e-15
FBgn0029937	CG8300	uncharacterized protein	730.485	0.436012	0.10495	4.1545	3.26006e-05	0.000104898
FBgn0029958	Pdp	Pyruvate dehydrogenase phosphatase	1679.96	0.368352	0.0908553	4.05427	5.02908e-05	0.000156651
FBgn0029975	spidey	spidey	3561.05	0.638721	0.137877	4.63254	3.61204e-06	1.36421e-05
FBgn0029994	Ldsdh1	Lipid droplet subset dehydrogenase 1	263.023	0.553259	0.248429	2.22703	0.0259449	0.0466685
FBgn0030001	cyr	cypher	6.69016	2.28771	0.684446	3.34242	0.000830511	0.00206386
FBgn0030005	CG2120	uncharacterized protein	10.5976	2.07539	0.482886	4.2979	1.72428e-05	5.81867e-05
FBgn0030011	Gbeta5	Gbeta5	269.362	1.71959	0.223911	7.67979	1.59354e-14	1.94108e-13
FBgn0030013	GIIIspla2	Phospholipase A2 group III	484.84	0.602766	0.0904308	6.6655	2.63774e-11	2.0603e-10
FBgn0030027	CG1632	uncharacterized protein	28.7764	1.04098	0.413676	2.51642	0.0118553	0.0230266
FBgn0030029	CG15343	uncharacterized protein	57.7578	1.3339	0.234517	5.68783	1.28662e-08	6.94797e-08
FBgn0030033	CG1387	uncharacterized protein	6.63733	2.61098	1.01514	2.57203	0.0101104	0.0199343
FBgn0030035	PIG-T	Phosphatidylinositol glycan anchor biosynthesis class T	2008.14	0.34207	0.127513	2.68262	0.00730481	0.0148469
FBgn0030038	CG1440	uncharacterized protein	3309.13	0.258802	0.0887972	2.91453	0.00356222	0.00775762
FBgn0030040	CG15347	uncharacterized protein	663.067	2.55806	0.376251	6.79881	1.05489e-11	8.75286e-11
FBgn0030041	CG12116	uncharacterized protein	364.07	0.791742	0.285727	2.77098	0.00558882	0.0116595
FBgn0030052	CG12065	uncharacterized protein	3698.6	2.04947	0.171948	11.9192	9.4033e-33	5.45965e-31
FBgn0030055	CG12772	uncharacterized protein	484.941	0.559043	0.109182	5.12027	3.05104e-07	1.35909e-06
FBgn0030065	CG12075	uncharacterized protein	395.857	3.09957	0.342132	9.05957	1.30969e-19	2.72221e-18
FBgn0030073	CG10962	uncharacterized protein	199.479	1.21524	0.320487	3.79184	0.000149536	0.000429006
FBgn0030077	CG15365	uncharacterized protein	501.611	1.83727	0.233866	7.85609	3.96304e-15	5.20065e-14
FBgn0030078	CG10970	uncharacterized protein	96.044	2.27271	0.375075	6.05936	1.36668e-09	8.47366e-09
FBgn0030102	SmydA-9	SET and MYND domain containing, arthropod-specific, member 9	2660.13	3.20295	0.263067	12.1754	4.20184e-34	2.69702e-32
FBgn0030103	Obp8a	Odorant-binding protein 8a	2.23709	5.44547	1.67512	3.2508	0.00115081	0.0027666
FBgn0030105	CG15369	uncharacterized protein	57.14	3.54975	0.509214	6.97105	3.14588e-12	2.80975e-11
FBgn0030114	CG17754	uncharacterized protein	1033.87	1.00556	0.348659	2.88408	0.00392556	0.0084724
FBgn0030141	Gga	Golgi-localized, gamma-adaptin ear containing, ARF binding protein	961.371	0.667778	0.0944016	7.0738	1.50745e-12	1.41579e-11
FBgn0030156	CG15247	uncharacterized protein	216.374	2.01288	0.19231	10.4669	1.22647e-25	4.29197e-24
FBgn0030157	CG1468	uncharacterized protein	117.803	0.912551	0.331244	2.75492	0.00587064	0.01219
FBgn0030158	CG9686	uncharacterized protein	369.403	0.851964	0.375517	2.26878	0.0232819	0.0422898
FBgn0030159	CG9689	uncharacterized protein	9.02512	1.89614	0.512722	3.69818	0.000217147	0.000603819
FBgn0030160	CG9691	uncharacterized protein	821.335	2.11602	0.241442	8.76412	1.88236e-18	3.57648e-17
FBgn0030161	CG15249	uncharacterized protein	29.2516	2.53833	0.71421	3.55404	0.000379359	0.00100675
FBgn0030163	CG1791	uncharacterized protein	3.47297	3.43493	1.22088	2.81348	0.00490084	0.010371
FBgn0030164	CG1889	uncharacterized protein	28.8584	2.63304	0.379054	6.94635	3.74851e-12	3.30818e-11
FBgn0030189	CG2909	uncharacterized protein	125.882	1.09015	0.185339	5.88194	4.05486e-09	2.34289e-08
FBgn0030207	CG2887	uncharacterized protein	8.19507	1.87869	0.541422	3.46992	0.000520623	0.00134617
FBgn0030234	CG15211	uncharacterized protein	952.411	2.36011	0.243687	9.68501	3.49171e-22	9.0682e-21
FBgn0030237	CG15209	uncharacterized protein	158.324	1.99152	0.274574	7.25312	4.07291e-13	4.08875e-12
FBgn0030244	CG2157	uncharacterized protein	10.7617	1.91872	0.48418	3.96283	7.4066e-05	0.00022428
FBgn0030245	CG1637	uncharacterized protein	2580.13	1.0938	0.0879941	12.4304	1.78725e-35	1.29477e-33
FBgn0030251	CG2145	uncharacterized protein	456.766	3.03629	0.204526	14.8455	7.44121e-50	1.35561e-47
FBgn0030257	SmydA-4	SET and MYND domain containing, arthropod-specific, member 4	393.394	3.2897	0.365238	9.00703	2.11722e-19	4.37134e-18
FBgn0030258	CG1552	uncharacterized protein	6.13937	3.53762	0.932315	3.79445	0.000147971	0.000424713
FBgn0030261	CG15203	uncharacterized protein	22.2565	2.44215	0.440161	5.54831	2.88449e-08	1.49824e-07
FBgn0030262	Vago	vago	59.5237	1.23487	0.269029	4.5901	4.4303e-06	1.65011e-05
FBgn0030263	CG2076	uncharacterized protein	1831.1	0.685063	0.173448	3.94966	7.82607e-05	0.000235944
FBgn0030269	CDK2AP1	CDK2-associated protein 1	526.308	0.670299	0.301453	2.22356	0.026178	0.047033
FBgn0030270	CG15199	uncharacterized protein	275.953	4.23743	0.927945	4.56647	4.96006e-06	1.83583e-05
FBgn0030271	CG15202	uncharacterized protein	68.6027	2.54426	0.552963	4.60114	4.20192e-06	1.57356e-05
FBgn0030272	CG15201	uncharacterized protein	79.9579	0.93439	0.410642	2.27544	0.0228798	0.0416246
FBgn0030290	CG11756	uncharacterized protein	7.27316	1.5312	0.681497	2.24682	0.0246519	0.0445204
FBgn0030298	Or10a	Odorant receptor 10a	3.60552	2.39789	0.675383	3.55042	0.000384619	0.00101983
FBgn0030300	Sk1	Sphingosine kinase 1	90.1177	2.22857	0.30895	7.21337	5.45821e-13	5.39636e-12
FBgn0030304	Cyp4g15	Cyp4g15	631.261	2.85758	0.407705	7.00893	2.40143e-12	2.18903e-11
FBgn0030309	CG1572	uncharacterized protein	4335.06	2.01227	0.155423	12.9471	2.44059e-38	2.20687e-36
FBgn0030310	PGRP-SA	Peptidoglycan recognition protein SA	51.6603	1.78094	0.442647	4.02339	5.7366e-05	0.000177043
FBgn0030317	CG1561	uncharacterized protein	442.326	0.952818	0.260199	3.66188	0.000250373	0.00068971
FBgn0030318	rho-4	rhomboid-4	1499.37	0.24822	0.084346	2.94288	0.0032517	0.00714727
FBgn0030319	CG2533	uncharacterized protein	11.1685	1.42882	0.513589	2.78202	0.00540213	0.0113109
FBgn0030326	CG2444	uncharacterized protein	66.0718	3.21268	0.270259	11.8874	1.37613e-32	7.89235e-31
FBgn0030327	FucT6	alpha1,6-fucosyltransferase	1280.95	0.535425	0.133194	4.01989	5.8225e-05	0.000179426
FBgn0030329	prtp	pretaporter	3129.25	0.519065	0.0725618	7.15343	8.46386e-13	8.20425e-12
FBgn0030331	CG15221	uncharacterized protein	49.4137	3.56325	0.704621	5.05697	4.2596e-07	1.85737e-06
FBgn0030332	CG9360	uncharacterized protein	226.076	2.56106	0.233974	10.9459	6.95244e-28	2.89016e-26
FBgn0030334	Karl	karl	490.132	2.08991	0.234762	8.90225	5.47262e-19	1.08995e-17
FBgn0030341	p24-1	p24-related-1	1788.5	0.402865	0.129693	3.10629	0.00189453	0.00436154
FBgn0030348	CG10352	uncharacterized protein	43.042	2.50812	0.54949	4.56445	5.00814e-06	1.85086e-05
FBgn0030349	CG10353	uncharacterized protein	1870.38	0.845774	0.144462	5.85464	4.78052e-09	2.72908e-08
FBgn0030357	Sclp	sclp	417.457	1.2175	0.429018	2.83788	0.00454147	0.0096716
FBgn0030360	CG1806	uncharacterized protein	151.802	1.12211	0.135178	8.30098	1.03254e-16	1.65047e-15
FBgn0030362	regucalcin	regucalcin	3964.08	3.37798	0.306815	11.0099	3.42568e-28	1.47352e-26
FBgn0030367	Cyp311a1	Cyp311a1	79.1714	2.51744	0.37574	6.69995	2.08492e-11	1.65246e-10
FBgn0030369	Cyp318a1	Cyp318a1	1874.65	2.33101	0.160622	14.5124	1.01066e-47	1.49049e-45
FBgn0030389	CG15927	uncharacterized protein	4.48935	5.42783	0.99597	5.44979	5.043e-08	2.52008e-07
FBgn0030390	CG15731	uncharacterized protein	8.5409	4.17996	0.757523	5.51793	3.43007e-08	1.76095e-07
FBgn0030391	Rab40	Rab40	720.886	0.899141	0.0838998	10.7168	8.48494e-27	3.26433e-25
FBgn0030425	Nep6	Neprilysin 6	62.3958	1.35212	0.394402	3.42828	0.000607426	0.00155086
FBgn0030432	CG4404	uncharacterized protein	1653.36	0.341467	0.119859	2.8489	0.00438706	0.00937177
FBgn0030447	CG2200	uncharacterized protein	926.761	0.32517	0.141445	2.29892	0.0215097	0.0394176
FBgn0030452	MFS10	Major Facilitator Superfamily Transporter 10	620.702	1.51782	0.233853	6.49048	8.55612e-11	6.25698e-10
FBgn0030467	CG1764	uncharacterized protein	301.17	0.571002	0.152211	3.75138	0.000175862	0.000497505
FBgn0030478	CG1640	uncharacterized protein	4603.42	0.337162	0.0984651	3.42418	0.000616656	0.00157313
FBgn0030479	Rbp1-like	Rbp1-like	1437.14	0.742865	0.211859	3.50642	0.000454179	0.00118575
FBgn0030482	CG1673	uncharacterized protein	1021.24	0.555028	0.189469	2.92939	0.00339631	0.00743085
FBgn0030484	GstT4	Glutathione S transferase T4	391.126	2.2571	0.358018	6.30443	2.89248e-10	1.97096e-09
FBgn0030485	CG1998	uncharacterized protein	96.0767	1.45649	0.205394	7.09119	1.3296e-12	1.26022e-11
FBgn0030503	Tango2	Transport and Golgi organization 2	793.651	0.987672	0.1613	6.12321	9.17088e-10	5.80526e-09
FBgn0030505	NFAT	NFAT nuclear factor	2203.87	0.578124	0.262151	2.20531	0.0274326	0.0490382
FBgn0030511	CG11158	uncharacterized protein	258.669	0.499422	0.225665	2.21311	0.0268898	0.0481652
FBgn0030519	CG11151	uncharacterized protein	1930.63	1.15607	0.172717	6.69342	2.18019e-11	1.72027e-10
FBgn0030521	CtsB1	Cathepsin B1	4680.83	0.982664	0.0869155	11.306	1.22588e-29	5.79624e-28
FBgn0030539	CG1368	uncharacterized protein	49.0475	1.82385	0.653122	2.79251	0.00523001	0.0109924
FBgn0030544	CG13403	uncharacterized protein	119.523	3.45383	0.379152	9.10934	8.28849e-20	1.75818e-18
FBgn0030562	CG9400	uncharacterized protein	309.125	3.85738	0.241624	15.9644	2.26218e-57	5.18961e-55
FBgn0030569	CG9411	uncharacterized protein	60.2715	3.00036	0.76924	3.90042	9.60253e-05	0.000284993
FBgn0030574	sbm	sobremesa	1097.82	2.49651	0.201807	12.3708	3.76151e-35	2.63263e-33
FBgn0030575	CG5321	uncharacterized protein	68.8528	2.51049	0.353455	7.10273	1.22315e-12	1.16468e-11
FBgn0030576	CG15890	uncharacterized protein	54.8262	3.74413	0.432007	8.66682	4.44347e-18	8.15491e-17
FBgn0030589	CG9519	uncharacterized protein	6.46608	2.48975	0.799435	3.11438	0.00184331	0.00425945
FBgn0030590	CG9518	uncharacterized protein	45.9875	1.41432	0.626183	2.25863	0.0239061	0.0433346
FBgn0030593	CG9512	uncharacterized protein	4586.5	2.49618	0.333267	7.49005	6.88499e-14	7.66318e-13
FBgn0030594	fiz	fezzik	1135.64	2.73797	0.524754	5.21762	1.81239e-07	8.33094e-07
FBgn0030597	Eo	Ecdysone oxidase	15.7366	3.80131	0.500834	7.58997	3.19985e-14	3.76089e-13
FBgn0030608	Lsd-2	Lipid storage droplet-2	4963.16	0.418139	0.133463	3.133	0.00173032	0.00402085
FBgn0030613	Rab3-GEF	Rab3 GDP-GTP exchange factor	100.978	4.06306	0.49545	8.20073	2.38929e-16	3.63619e-15
FBgn0030615	Cyp4s3	Cyp4s3	181.57	2.02044	0.275952	7.3217	2.44851e-13	2.53613e-12
FBgn0030617	CG9095	uncharacterized protein	165.733	1.46997	0.367248	4.00266	6.26334e-05	0.000192102
FBgn0030634	CG9164	uncharacterized protein	134.534	1.89389	0.21596	8.76965	1.79219e-18	3.41039e-17
FBgn0030638	CG11655	uncharacterized protein	831.305	0.69106	0.1443	4.78904	1.67579e-06	6.70748e-06
FBgn0030641	CG6299	uncharacterized protein	584.583	0.843234	0.28652	2.94302	0.00325023	0.00714531
FBgn0030653	CG7860	uncharacterized protein	402.141	2.75152	0.376183	7.31431	2.58708e-13	2.67519e-12
FBgn0030654	CG15643	uncharacterized protein	118.227	0.362572	0.153703	2.35891	0.0183287	0.034113
FBgn0030666	CG12708	uncharacterized protein	35.3885	2.21994	0.489484	4.53526	5.75322e-06	2.10363e-05
FBgn0030668	CG8128	uncharacterized protein	1612.41	1.51031	0.216091	6.98922	2.76415e-12	2.49579e-11
FBgn0030670	Pis	Phosphatidylinositol synthase	894.815	1.0052	0.0999124	10.0609	8.22848e-24	2.542e-22
FBgn0030683	Mvd	Mevalonate diphosphate decarboxylase	319.296	0.460922	0.154502	2.98328	0.0028518	0.00632893
FBgn0030685	Graf	GTPase regulator associated with FAK	1749.54	0.624014	0.146073	4.27192	1.93798e-05	6.49031e-05
FBgn0030688	CG8952	uncharacterized protein	147.761	1.90794	0.439633	4.33984	1.42586e-05	4.87943e-05
FBgn0030693	CG8974	uncharacterized protein	1877.1	0.348599	0.105186	3.31411	0.000919358	0.00225652
FBgn0030716	CG9170	uncharacterized protein	73.9675	1.32533	0.365745	3.62364	0.00029049	0.000788993
FBgn0030731	Mfe2	peroxisomal Multifunctional enzyme type 2	1119.75	1.69595	0.160068	10.5952	3.13767e-26	1.15463e-24
FBgn0030740	CG9917	uncharacterized protein	2304.45	0.34803	0.108502	3.20759	0.00133851	0.00318202
FBgn0030745	CG4239	uncharacterized protein	1402.52	2.38793	0.137466	17.371	1.36739e-67	4.3434e-65
FBgn0030746	CG9981	uncharacterized protein	20.5011	4.38783	1.06291	4.12812	3.65739e-05	0.000116833
FBgn0030747	CG4301	uncharacterized protein	141.464	2.87886	0.586126	4.91167	9.03034e-07	3.76913e-06
FBgn0030748	Traf-like	TNF-receptor-associated factor-like	68.7797	2.46412	0.589041	4.18328	2.87332e-05	9.36701e-05
FBgn0030749	AnxB11	Annexin B11	2134.8	1.20248	0.0935844	12.8491	8.70045e-38	7.33205e-36
FBgn0030752	CDC50	CDC50	1197.6	0.723722	0.0822738	8.7965	1.41144e-18	2.70247e-17
FBgn0030761	CG9784	uncharacterized protein	654.069	0.232463	0.0815203	2.8516	0.00434999	0.00929739
FBgn0030763	CG9782	uncharacterized protein	120.438	2.30048	0.460678	4.99368	5.92382e-07	2.52701e-06
FBgn0030769	CG13012	uncharacterized protein	124.579	2.16495	0.241192	8.97605	2.80666e-19	5.70918e-18
FBgn0030770	CG13010	uncharacterized protein	8.25703	2.08466	0.682137	3.05608	0.00224253	0.00508056
FBgn0030773	CG9676	uncharacterized protein	1.99595	3.83246	1.53768	2.49237	0.0126895	0.0244552
FBgn0030774	sphe	spheroide	58.4919	3.65208	1.39454	2.61885	0.00882266	0.0176254
FBgn0030775	CG9673	uncharacterized protein	90.0214	3.97373	1.22375	3.24718	0.00116557	0.00279989
FBgn0030776	CG4653	uncharacterized protein	38.4296	3.62457	1.16827	3.1025	0.00191893	0.00441196
FBgn0030796	CG4829	uncharacterized protein	1330.68	1.26913	0.207456	6.11759	9.50007e-10	6.0075e-09
FBgn0030798	CG13003	uncharacterized protein	219.287	3.84928	0.583879	6.59261	4.32173e-11	3.28855e-10
FBgn0030799	CG4872	uncharacterized protein	241.736	0.595361	0.135457	4.3952	1.10671e-05	3.84461e-05
FBgn0030804	CG13002	uncharacterized protein	47.5696	1.83916	0.367341	5.00669	5.53729e-07	2.37192e-06
FBgn0030806	CG13001	uncharacterized protein	371.22	0.576074	0.181892	3.16712	0.00153956	0.00361214
FBgn0030816	CG16700	uncharacterized protein	1161.51	2.52727	0.306279	8.25153	1.56374e-16	2.43056e-15
FBgn0030828	CG5162	uncharacterized protein	476.186	1.68871	0.223425	7.55829	4.08389e-14	4.68004e-13
FBgn0030829	CG12998	uncharacterized protein	933.094	3.31007	0.510395	6.4853	8.85564e-11	6.44936e-10
FBgn0030830	CG5172	uncharacterized protein	9.41538	2.79635	1.03354	2.7056	0.00681814	0.0139347
FBgn0030839	CG5613	uncharacterized protein	568.677	1.00871	0.263016	3.83518	0.000125473	0.000364275
FBgn0030847	CG12991	uncharacterized protein	967.128	1.84656	0.186668	9.8922	4.50042e-23	1.28164e-21
FBgn0030859	CG12990	uncharacterized protein	14.1993	1.74981	0.531998	3.28913	0.00100498	0.00244832
FBgn0030876	CG6762	uncharacterized protein	231.898	1.3749	0.173511	7.92402	2.29951e-15	3.14419e-14
FBgn0030882	Gss1	Glutathione synthetase 1	1492.32	0.658495	0.250457	2.62917	0.00855929	0.0171463
FBgn0030884	CG6847	uncharacterized protein	1390.16	2.72606	0.382271	7.13123	9.9479e-13	9.56048e-12
FBgn0030887	CG6867	uncharacterized protein	203.584	3.4231	0.263531	12.9894	1.4058e-38	1.3094e-36
FBgn0030893	RhoGAP16F	Rho GTPase activating protein at 16F	425.536	0.697978	0.184923	3.77442	0.000160378	0.00045799
FBgn0030895	CG7135	uncharacterized protein	13.2256	1.73136	0.570742	3.03352	0.00241715	0.00543442
FBgn0030897	Frq1	Frequenin 1	19.9984	3.0532	0.425075	7.18273	6.83343e-13	6.70781e-12
FBgn0030898	Andorra	andorra	2.73913	3.186	1.19809	2.65923	0.00783192	0.0158248
FBgn0030900	Him	Holes in muscle	4.46936	2.99012	0.98789	3.02678	0.00247174	0.00554608
FBgn0030904	NA	NA	15.4305	4.70439	0.663816	7.08688	1.37166e-12	1.29711e-11
FBgn0030913	CG6123	uncharacterized protein	15.0144	3.11337	0.745329	4.17718	2.95143e-05	9.59389e-05
FBgn0030914	CG6106	uncharacterized protein	224.379	1.82314	0.26571	6.86138	6.81987e-12	5.81849e-11
FBgn0030925	Hayan	hayan	138.786	1.68384	0.239297	7.03662	1.96962e-12	1.82223e-11
FBgn0030926	psh	persephone	53.4283	2.77619	0.261309	10.6242	2.30025e-26	8.58316e-25
FBgn0030927	CG15046	uncharacterized protein	99.0868	2.83334	0.357107	7.93414	2.11962e-15	2.90142e-14
FBgn0030928	CG15044	uncharacterized protein	69.3924	4.28719	1.67561	2.55859	0.0105097	0.020633
FBgn0030929	CG15043	uncharacterized protein	294.448	5.55633	1.39462	3.9841	6.77351e-05	0.000206472
FBgn0030941	wgn	wengen	992.139	0.714522	0.110507	6.46586	1.00725e-10	7.27991e-10
FBgn0030947	CG6696	uncharacterized protein	15.0798	2.08779	0.522941	3.99239	6.54102e-05	0.000199729
FBgn0030955	CG6891	uncharacterized protein	4027.29	0.71402	0.199947	3.57104	0.000355569	0.000949103
FBgn0030964	Pvf1	PDGF- and VEGF-related factor 1	1013.56	0.606771	0.184457	3.28949	0.00100368	0.00244564
FBgn0030968	CG7322	uncharacterized protein	802.811	1.29237	0.271625	4.75791	1.9561e-06	7.74686e-06
FBgn0030973	CG7332	uncharacterized protein	1636.39	0.271947	0.0735587	3.69701	0.000218151	0.000606205
FBgn0030975	SdhBL	Succinate dehydrogenase, subunit B (iron-sulfur)-like	6.37624	1.96145	0.744773	2.63362	0.00844789	0.0169615
FBgn0030976	CG7378	uncharacterized protein	1602.76	2.11004	0.17272	12.2165	2.53696e-34	1.6717e-32
FBgn0030983	CG15882	uncharacterized protein	5.73288	5.78629	1.1874	4.87308	1.09872e-06	4.51143e-06
FBgn0030992	CG33253	uncharacterized protein	116.032	2.59343	0.225972	11.4767	1.72681e-30	8.80319e-29
FBgn0030993	Mec2	Mec2	149.737	2.84636	0.327803	8.68316	3.8492e-18	7.117e-17
FBgn0030997	CG7990	uncharacterized protein	242.402	1.61305	0.317033	5.08798	3.61907e-07	1.59719e-06
FBgn0030998	CG14195	uncharacterized protein	139.956	3.34986	0.52092	6.43066	1.27053e-10	9.04043e-10
FBgn0030999	Mur18B	Mucin related 18B	22466.2	3.2061	0.537728	5.9623	2.48708e-09	1.48697e-08
FBgn0031000	Muc18B	Mucin 18B	3.02023	3.50652	1.23162	2.84709	0.00441216	0.00942213
FBgn0031001	CG7884	uncharacterized protein	30.2323	1.76346	0.702987	2.50852	0.0121237	0.0235074
FBgn0031002	CG14196	uncharacterized protein	778.838	3.47339	0.145643	23.8487	1.0445e-125	6.46961e-122
FBgn0031004	CG7992	uncharacterized protein	136.872	3.38677	0.562188	6.02427	1.69878e-09	1.03413e-08
FBgn0031010	CG8028	uncharacterized protein	553.554	2.86392	0.473877	6.04359	1.50724e-09	9.27097e-09
FBgn0031012	CG8051	uncharacterized protein	118.758	2.00366	0.416621	4.8093	1.51459e-06	6.10367e-06
FBgn0031033	CG14219	uncharacterized protein	8.01718	2.63006	1.15583	2.27546	0.0228782	0.0416246
FBgn0031037	CG14207	uncharacterized protein	4096.29	1.92928	0.148448	12.9964	1.28284e-38	1.21312e-36
FBgn0031048	CG12237	uncharacterized protein	1350.9	0.528159	0.220748	2.39259	0.0167297	0.0314441
FBgn0031055	et	eye transformer	125.708	2.69221	0.271144	9.92908	3.1112e-23	9.02612e-22
FBgn0031058	CG14227	uncharacterized protein	30.3209	0.714249	0.295131	2.42011	0.0155157	0.0293807
FBgn0031059	CG14229	uncharacterized protein	302.871	0.478646	0.169257	2.82793	0.00468494	0.00994295
FBgn0031064	CG12531	uncharacterized protein	11.7486	1.38981	0.608243	2.28495	0.0223158	0.0406841
FBgn0031081	Nep3	Neprilysin 3	812.847	2.38255	0.324232	7.34828	2.00776e-13	2.09538e-12
FBgn0031088	CG15322	uncharacterized protein	2.72262	3.87446	1.09354	3.54305	0.000395533	0.00104564
FBgn0031089	CG9572	uncharacterized protein	182.576	2.74977	0.452058	6.08278	1.1812e-09	7.36052e-09
FBgn0031092	CG9577	uncharacterized protein	923.525	0.448418	0.196121	2.28644	0.0222287	0.0405432
FBgn0031097	obst-A	obstructor-A	92.0608	2.23505	0.533473	4.18962	2.79426e-05	9.1261e-05
FBgn0031099	CG17065	uncharacterized protein	484.834	1.46033	0.341513	4.27606	1.90228e-05	6.38457e-05
FBgn0031100	CG1504	uncharacterized protein	17.0745	4.69251	0.683389	6.86653	6.57844e-12	5.62802e-11
FBgn0031106	Syx16	Syntaxin 16	383.182	0.650939	0.247401	2.6311	0.00851078	0.0170712
FBgn0031141	CG1304	uncharacterized protein	5.79599	4.76117	2.14824	2.21631	0.0266704	0.0478276
FBgn0031142	r-cup	ryder cup	41.7956	1.16544	0.306783	3.79891	0.000145337	0.000417442
FBgn0031143	CG1532	uncharacterized protein	1754.63	0.760926	0.19361	3.93019	8.48779e-05	0.000254453
FBgn0031174	CG1486	uncharacterized protein	1350.02	0.786633	0.31047	2.53368	0.0112871	0.0219918
FBgn0031190	CG12576	uncharacterized protein	2781.95	0.680327	0.0837514	8.12316	4.54182e-16	6.71409e-15
FBgn0031194	CG17598	uncharacterized protein	1222.32	0.24563	0.0751059	3.27045	0.00107377	0.00260056
FBgn0031201	CG12446	uncharacterized protein	2.33772	2.8525	1.15286	2.47429	0.0133501	0.0256564
FBgn0031208	NA	NA	8.72964	1.18052	0.493893	2.39023	0.0168376	0.0315942
FBgn0031220	CG4822	uncharacterized protein	290.993	1.79813	0.229395	7.8386	4.55605e-15	5.91618e-14
FBgn0031232	CG11617	uncharacterized protein	30.7005	2.08835	0.357052	5.84886	4.94952e-09	2.81648e-08
FBgn0031245	CG3625	uncharacterized protein	518.74	1.81859	0.164291	11.0693	1.76842e-28	7.79614e-27
FBgn0031249	CG11911	uncharacterized protein	7.62612	3.43166	0.935239	3.66929	0.000243229	0.000671073
FBgn0031250	Ent1	Equilibrative nucleoside transporter 1	819.833	0.340227	0.124659	2.72925	0.00634778	0.0130647
FBgn0031251	CG4213	uncharacterized protein	347.463	2.43819	0.341936	7.13054	9.99755e-13	9.60075e-12
FBgn0031261	nAChRbeta3	nicotinic Acetylcholine Receptor beta3	617.09	3.15645	0.46047	6.85486	7.13829e-12	6.06094e-11
FBgn0031263	Tspo	Translocator protein	2573.71	1.22697	0.097083	12.6384	1.29736e-36	1.01719e-34
FBgn0031264	CG11835	uncharacterized protein	116.955	2.69204	0.379718	7.08958	1.34518e-12	1.27401e-11
FBgn0031268	cold	coiled	655.663	0.943931	0.233462	4.04318	5.27305e-05	0.000163757
FBgn0031285	CG3662	uncharacterized protein	5340.82	1.38519	0.104487	13.257	4.10982e-40	4.27836e-38
FBgn0031286	CG3862	uncharacterized protein	338.73	0.294592	0.114042	2.58319	0.00978914	0.0193719
FBgn0031292	CG15824	uncharacterized protein	3.76279	2.23571	0.762904	2.93053	0.00338388	0.00740759
FBgn0031294	IA-2	IA-2 protein tyrosine phosphatase	472.21	2.43886	0.469728	5.19207	2.07971e-07	9.48234e-07
FBgn0031296	CG4415	uncharacterized protein	82.7336	3.23302	0.389108	8.30879	9.66814e-17	1.55544e-15
FBgn0031298	Atg4a	Autophagy-related 4a	967.724	0.669769	0.0921772	7.2661	3.70009e-13	3.72353e-12
FBgn0031302	CG14340	uncharacterized protein	2.94074	2.40409	0.966291	2.48795	0.012848	0.0247452
FBgn0031304	CG4552	uncharacterized protein	816.386	0.761544	0.0914763	8.32505	8.42937e-17	1.36859e-15
FBgn0031306	CG4577	uncharacterized protein	57.1303	2.05688	0.349824	5.87977	4.10827e-09	2.37154e-08
FBgn0031307	MFS3	Major Facilitator Superfamily Transporter 3	74.5712	3.16741	0.477711	6.6304	3.34782e-11	2.58397e-10
FBgn0031313	CG5080	uncharacterized protein	3024.6	2.83883	0.366985	7.73553	1.02973e-14	1.27818e-13
FBgn0031322	CG5001	uncharacterized protein	873.113	2.46668	0.217136	11.3601	6.60803e-30	3.21021e-28
FBgn0031327	CG5397	uncharacterized protein	791.314	2.32227	0.332745	6.97914	2.97001e-12	2.67193e-11
FBgn0031337	CG14346	uncharacterized protein	8.86474	4.48547	0.702426	6.38569	1.7063e-10	1.19355e-09
FBgn0031343	CG18131	uncharacterized protein	27.3922	1.24225	0.421067	2.95025	0.00317513	0.0069976
FBgn0031344	CG7420	uncharacterized protein	434.169	0.18833	0.0821853	2.29153	0.0219326	0.0400976
FBgn0031356	CG17660	uncharacterized protein	1499.48	0.399276	0.0863236	4.62534	3.73983e-06	1.41032e-05
FBgn0031359	Rim2	Replication in mitochondria 2	999.951	0.510595	0.131575	3.88064	0.000104183	0.000307144
FBgn0031360	CG31937	uncharacterized protein	1202.74	0.679056	0.17782	3.81877	0.000134118	0.000387827
FBgn0031379	CG7289	uncharacterized protein	1112.6	0.259418	0.0899823	2.88299	0.00393921	0.00849859
FBgn0031389	CG4259	uncharacterized protein	189.83	2.54666	0.252853	10.0717	7.3689e-24	2.28787e-22
FBgn0031395	CG10874	uncharacterized protein	783.559	0.88099	0.115361	7.63682	2.22651e-14	2.67268e-13
FBgn0031397	CG15385	uncharacterized protein	92.832	1.99381	0.283592	7.03054	2.05737e-12	1.89493e-11
FBgn0031413	CG9967	uncharacterized protein	490.545	0.384764	0.13939	2.76035	0.00577399	0.0120114
FBgn0031417	CG3597	uncharacterized protein	339.528	1.90503	0.323261	5.89316	3.78891e-09	2.20776e-08
FBgn0031418	CG3609	uncharacterized protein	2537.13	1.26203	0.283032	4.45895	8.23612e-06	2.93019e-05
FBgn0031426	CG18641	uncharacterized protein	23.2673	1.76955	0.293221	6.03487	1.5909e-09	9.71799e-09
FBgn0031428	CG9886	uncharacterized protein	204.869	0.809335	0.175	4.62478	3.75e-06	1.41373e-05
FBgn0031432	Cyp309a1	Cyp309a1	53.4997	2.07079	0.597125	3.46793	0.000524491	0.00135504
FBgn0031446	CG15398	uncharacterized protein	21.2982	2.60067	0.433818	5.99485	2.03672e-09	1.23017e-08
FBgn0031449	CG31689	uncharacterized protein	2652.34	0.546497	0.075663	7.22277	5.09387e-13	5.05632e-12
FBgn0031450	Hrs	Hepatocyte growth factor regulated tyrosine kinase substrate	883.067	0.816708	0.320089	2.5515	0.0107259	0.0209976
FBgn0031451	CG9961	uncharacterized protein	14.7948	1.67996	0.473715	3.54635	0.000390606	0.00103394
FBgn0031457	CG3077	uncharacterized protein	500.309	0.947766	0.109027	8.69292	3.53227e-18	6.56037e-17
FBgn0031460	CG15399	uncharacterized protein	4.41559	2.74447	0.797293	3.44223	0.000576939	0.00147943
FBgn0031461	daw	dawdle	64.4959	0.945176	0.411728	2.29563	0.0216969	0.0397077
FBgn0031468	CG2975	uncharacterized protein	17.0566	1.98975	0.44384	4.48304	7.35883e-06	2.63929e-05
FBgn0031470	CG18557	uncharacterized protein	8.97765	1.96168	0.701388	2.79685	0.00516039	0.0108618
FBgn0031471	CG3117	uncharacterized protein	9.40313	2.86954	0.619203	4.63425	3.5824e-06	1.35549e-05
FBgn0031473	CG3104	uncharacterized protein	346.917	3.66597	0.397882	9.21371	3.15053e-20	6.94463e-19
FBgn0031474	CG2991	uncharacterized protein	1254.25	0.750553	0.142282	5.27512	1.32669e-07	6.20657e-07
FBgn0031478	CG8814	uncharacterized protein	971.579	0.442837	0.0984964	4.49597	6.92519e-06	2.4946e-05
FBgn0031489	CG17224	uncharacterized protein	923.001	2.54806	0.281338	9.05695	1.34154e-19	2.78376e-18
FBgn0031490	CG17264	uncharacterized protein	114.893	2.26042	0.243479	9.28381	1.6352e-20	3.72369e-19
FBgn0031495	GABPI	beta4GalNAcTB pilot	704.98	0.307707	0.12244	2.51312	0.0119667	0.023232
FBgn0031514	OtopLb	Otopetrin-like b	65.3199	2.66094	0.876844	3.03468	0.00240795	0.00541668
FBgn0031515	CG9664	uncharacterized protein	90.7446	1.77288	0.559356	3.1695	0.00152702	0.00358474
FBgn0031517	CG15406	uncharacterized protein	1535.7	2.88144	0.481348	5.98619	2.14819e-09	1.29246e-08
FBgn0031518	CG3277	uncharacterized protein	24.3419	1.30642	0.594439	2.19774	0.027968	0.049872
FBgn0031520	CG8837	uncharacterized protein	180.277	3.31065	0.513233	6.45058	1.1142e-10	8.01553e-10
FBgn0031522	CG3285	uncharacterized protein	370.036	1.95971	0.520936	3.7619	0.000168626	0.000479003
FBgn0031523	CG15408	uncharacterized protein	421.836	3.27724	0.480897	6.81486	9.43588e-12	7.88743e-11
FBgn0031528	CG15412	uncharacterized protein	52.7411	1.96414	0.27437	7.15872	8.14342e-13	7.91843e-12
FBgn0031530	Pgant2	Polypeptide N-Acetylgalactosaminyltransferase 2	412.117	1.55574	0.296713	5.24325	1.57774e-07	7.32574e-07
FBgn0031536	Cog3	Cog3	597.505	0.226371	0.0859018	2.63523	0.00840796	0.0168978
FBgn0031538	CG3246	uncharacterized protein	115.516	1.61672	0.342138	4.72534	2.29734e-06	9.00615e-06
FBgn0031542	CG15414	uncharacterized protein	13.6915	3.56747	0.762459	4.6789	2.88415e-06	1.11235e-05
FBgn0031545	CG3213	uncharacterized protein	9.80197	2.32843	1.01349	2.29743	0.0215941	0.0395547
FBgn0031546	CG8851	uncharacterized protein	1.88353	3.77457	1.62526	2.32245	0.0202089	0.0372763
FBgn0031547	Sr-CIV	Scavenger receptor class C, type IV	41.2476	1.62909	0.584529	2.78702	0.00531956	0.0111634
FBgn0031548	CG8852	uncharacterized protein	151.1	2.10295	0.246767	8.52202	1.568e-17	2.73199e-16
FBgn0031558	CG16704	uncharacterized protein	225.504	1.67985	0.479893	3.50048	0.00046443	0.00121149
FBgn0031559	CG3513	uncharacterized protein	58.0414	1.13011	0.290729	3.88715	0.00010143	0.00029974
FBgn0031563	CG10031	uncharacterized protein	52.5855	1.69301	0.548772	3.08508	0.00203495	0.00465368
FBgn0031571	bark	bark beetle	575.687	1.26071	0.330635	3.813	0.000137292	0.000395988
FBgn0031592	Art2	Arginine methyltransferase 2	7.56371	1.61266	0.523749	3.07908	0.00207643	0.00473979
FBgn0031602	CG15431	uncharacterized protein	249.952	2.42978	0.373475	6.50587	7.72426e-11	5.69234e-10
FBgn0031611	FIG4	FIG4 phosphoinositide 5-phosphatase	397.614	0.427627	0.14599	2.92915	0.00339891	0.00743392
FBgn0031613	HP6	Heterochromatin protein 6	24.9599	1.88136	0.431398	4.36108	1.29423e-05	4.4598e-05
FBgn0031620	CG11929	uncharacterized protein	11.475	4.15613	0.853699	4.86838	1.12517e-06	4.6139e-06
FBgn0031621	Elba3	Early boundary activity 3	3.33128	5.31669	1.37192	3.87536	0.000106467	0.000313355
FBgn0031622	CG3251	uncharacterized protein	16.8706	2.96104	0.705703	4.19588	2.71817e-05	8.8987e-05
FBgn0031627	fipi	factor of interpulse interval	13.1008	2.17095	0.530367	4.09329	4.25295e-05	0.000134608
FBgn0031630	CG15629	uncharacterized protein	631.212	1.84145	0.215636	8.53961	1.34673e-17	2.36642e-16
FBgn0031635	tank	tank	730.139	0.248581	0.0954219	2.60508	0.00918541	0.0182452
FBgn0031637	mxt	mextli	2817.86	1.30154	0.100755	12.9179	3.56902e-38	3.13568e-36
FBgn0031646	snsl	snustorr snarlik	113.259	1.29538	0.258594	5.00933	5.46208e-07	2.34132e-06
FBgn0031649	hoe2	hoepel2	12.3058	2.45653	0.807946	3.04046	0.00236217	0.00532143
FBgn0031652	jet	jetlag	151.273	0.380686	0.136196	2.79514	0.00518773	0.010911
FBgn0031673	CG31650	uncharacterized protein	1266.18	0.660085	0.0900304	7.3318	2.2708e-13	2.35798e-12
FBgn0031675	CG9121	uncharacterized protein	30.8924	1.22896	0.454705	2.70275	0.0068768	0.0140369
FBgn0031689	Cyp28d1	Cyp28d1	202.257	1.88717	0.521185	3.62092	0.000293553	0.000796611
FBgn0031693	Cyp4ac1	Cyp4ac1	17.008	1.6386	0.598373	2.73842	0.00617352	0.0127526
FBgn0031695	Cyp4ac3	Cyp4ac3	22.1573	1.72141	0.400842	4.29447	1.75108e-05	5.90269e-05
FBgn0031700	CG14022	uncharacterized protein	13.9584	1.91495	0.45521	4.20673	2.59089e-05	8.51805e-05
FBgn0031701	TotM	Turandot M	5.72858	2.22789	0.846163	2.63293	0.00846519	0.0169935
FBgn0031702	fusl	fuseless	384.36	2.9319	0.446359	6.56849	5.08283e-11	3.84643e-10
FBgn0031713	Coq6	Coenzyme Q6	840.392	0.35652	0.114565	3.11195	0.00185853	0.00429142
FBgn0031717	Oscillin	oscillin	351.925	0.406358	0.176806	2.29833	0.0215431	0.0394671
FBgn0031723	CG7251	uncharacterized protein	2.37794	3.66317	1.62734	2.25102	0.0243845	0.0441179
FBgn0031726	Cyp6a16	Cyp6a16	18.5177	2.68756	0.442701	6.07082	1.27256e-09	7.90594e-09
FBgn0031728	Hsp60C	Heat shock protein 60C	21.5751	1.68949	0.542657	3.11337	0.00184966	0.00427332
FBgn0031732	CG11149	uncharacterized protein	27.9813	2.7982	1.06581	2.62543	0.0086539	0.0173218
FBgn0031734	CG11147	uncharacterized protein	336.925	1.88893	0.234199	8.0655	7.29377e-16	1.05064e-14
FBgn0031737	obst-E	obstructor-E	138.292	2.94138	0.612762	4.8002	1.58505e-06	6.36692e-06
FBgn0031738	CG9171	uncharacterized protein	1741.57	0.698899	0.131793	5.30301	1.13911e-07	5.40044e-07
FBgn0031741	CG11034	uncharacterized protein	280.664	0.838041	0.211907	3.95476	7.6612e-05	0.000231311
FBgn0031747	CG9021	uncharacterized protein	2.72869	2.19581	0.951018	2.30891	0.0209488	0.0384922
FBgn0031752	CG9044	uncharacterized protein	912.126	0.408392	0.136166	2.99921	0.00270676	0.00603299
FBgn0031758	Ucp4B	Uncoupling protein 4B	13.2156	1.03345	0.372703	2.77286	0.00555662	0.0116041
FBgn0031771	ND-51	NADH dehydrogenase (ubiquinone) 51 kDa subunit	4509.26	0.277078	0.0710414	3.90024	9.60987e-05	0.000285143
FBgn0031785	CG13991	uncharacterized protein	12.3709	3.47309	0.708851	4.89961	9.6028e-07	3.98792e-06
FBgn0031791	AANATL2	Arylalkylamine N-acetyltransferase-like 2	84.6953	2.59659	0.452499	5.73833	9.56137e-09	5.23173e-08
FBgn0031800	CG9497	uncharacterized protein	48.6583	2.45594	0.454587	5.40258	6.56882e-08	3.23043e-07
FBgn0031801	CG9498	uncharacterized protein	668.512	3.05382	0.421102	7.25196	4.10779e-13	4.11861e-12
FBgn0031808	Nepl5	Neprilysin-like 5	6.81542	1.98143	0.567237	3.49313	0.000477398	0.00124401
FBgn0031811	CG13982	uncharacterized protein	20.227	2.50744	0.358301	6.99813	2.59398e-12	2.35243e-11
FBgn0031813	CG9527	uncharacterized protein	891.542	1.65265	0.160308	10.3092	6.40039e-25	2.11435e-23
FBgn0031814	retm	real-time	653.125	0.65265	0.189687	3.44067	0.000580281	0.00148646
FBgn0031815	frj	farjavit	1280.56	0.683378	0.0592638	11.5311	9.19263e-31	4.74493e-29
FBgn0031816	Rchy1	Ring finger and CHY zinc finger domain containing 1	132.374	1.60212	0.382416	4.18947	2.79607e-05	9.1296e-05
FBgn0031818	CG9536	uncharacterized protein	924.826	0.406537	0.0977979	4.15691	3.22577e-05	0.000103983
FBgn0031824	CG9547	uncharacterized protein	657.972	0.490502	0.128708	3.81098	0.000138418	0.00039905
FBgn0031835	CG11319	uncharacterized protein	140.955	3.00908	0.408485	7.36643	1.7526e-13	1.83993e-12
FBgn0031849	CG11327	uncharacterized protein	11.704	3.59297	0.759111	4.73313	2.21085e-06	8.68635e-06
FBgn0031850	Tsp	Thrombospondin	57.3577	1.57596	0.431811	3.64964	0.000262609	0.000720922
FBgn0031855	meng	meng-po	87.1474	2.64778	0.229951	11.5146	1.11421e-30	5.70367e-29
FBgn0031857	LUBEL	Linear Ubiquitin E3 ligase	299.309	2.43845	0.26617	9.16125	5.1299e-20	1.1149e-18
FBgn0031858	CG17378	uncharacterized protein	11.8142	1.38115	0.494627	2.79231	0.00523334	0.0109976
FBgn0031860	CG11236	uncharacterized protein	58.101	2.06661	0.383084	5.39467	6.86513e-08	3.3668e-07
FBgn0031865	Nha1	Na[+]/H[+] hydrogen antiporter 1	67.5988	1.31487	0.513735	2.55942	0.0104846	0.0205903
FBgn0031869	CG18304	uncharacterized protein	1542.15	2.4364	0.263466	9.24748	2.29851e-20	5.13044e-19
FBgn0031879	uif	uninflatable	331.319	2.43373	0.394355	6.17142	6.76811e-10	4.3714e-09
FBgn0031888	Pvf2	PDGF- and VEGF-related factor 2	222.335	2.68592	0.401433	6.69084	2.21897e-11	1.74864e-10
FBgn0031893	MICU1	Mitochondrial calcium uptake 1	1029.19	0.368081	0.128887	2.85583	0.0042924	0.00919015
FBgn0031897	CG13784	uncharacterized protein	1542.89	0.845627	0.184962	4.57188	4.83362e-06	1.79171e-05
FBgn0031902	Wnt6	Wnt oncogene analog 6	105.741	1.87408	0.257572	7.27595	3.44003e-13	3.47595e-12
FBgn0031906	CG5160	uncharacterized protein	19.9393	2.48534	0.505526	4.91635	8.81724e-07	3.68889e-06
FBgn0031907	CG5171	uncharacterized protein	361.089	1.85009	0.391463	4.72609	2.28881e-06	8.97841e-06
FBgn0031908	CG5177	uncharacterized protein	3441.67	2.54234	0.119722	21.2353	4.50737e-100	6.97966e-97
FBgn0031910	CG15818	uncharacterized protein	54.0781	2.94288	0.913394	3.22192	0.00127336	0.00303705
FBgn0031913	CG5958	uncharacterized protein	781.524	1.76426	0.315853	5.58571	2.32745e-08	1.22068e-07
FBgn0031914	CG5973	uncharacterized protein	555.282	1.90776	0.347442	5.49087	3.99955e-08	2.03979e-07
FBgn0031918	CG6055	uncharacterized protein	155.377	2.49997	0.384309	6.50511	7.76387e-11	5.71812e-10
FBgn0031926	CG6739	uncharacterized protein	240.674	2.90178	0.244662	11.8604	1.90123e-32	1.08039e-30
FBgn0031929	CG18585	uncharacterized protein	8.25948	3.85115	1.46808	2.62325	0.00870955	0.0174191
FBgn0031930	CG7025	uncharacterized protein	8.7632	4.87509	1.85727	2.62486	0.00866834	0.0173451
FBgn0031935	CG13793	uncharacterized protein	195.059	5.40872	0.270734	19.978	8.56667e-89	6.63274e-86
FBgn0031936	CG13794	uncharacterized protein	10.0508	1.57931	0.617626	2.55706	0.010556	0.0207078
FBgn0031937	CG13795	uncharacterized protein	153.989	1.40362	0.411487	3.41109	0.000647033	0.00164274
FBgn0031939	CG13796	uncharacterized protein	210.791	0.614266	0.210786	2.91417	0.00356637	0.00776454
FBgn0031946	CG7164	uncharacterized protein	3.26485	4.66909	1.43582	3.25187	0.00114648	0.00275777
FBgn0031950	Herp	Homocysteine-induced endoplasmic reticulum protein	998.296	0.698554	0.0929329	7.51676	5.61521e-14	6.29514e-13
FBgn0031955	CG14535	uncharacterized protein	10.0556	3.3342	0.564817	5.90316	3.56603e-09	2.08475e-08
FBgn0031957	TwdlE	TweedleE	7.43806	3.18314	0.703751	4.5231	6.09393e-06	2.21969e-05
FBgn0031959	spz3	spatzle 3	72.8806	1.68672	0.231489	7.28638	3.18385e-13	3.23822e-12
FBgn0031970	CG7227	uncharacterized protein	45.6386	0.934673	0.359944	2.59672	0.00941196	0.0186732
FBgn0031971	Sirup	Starvation-upregulated protein	756.447	0.543036	0.209162	2.59625	0.00942488	0.0186898
FBgn0031973	Spn28Dc	Serpin 28Dc	378.432	2.02862	0.257131	7.88944	3.03541e-15	4.06515e-14
FBgn0031975	Tg	Transglutaminase	1707.87	1.22832	0.161956	7.58429	3.34319e-14	3.89609e-13
FBgn0031985	mon2	monensin sensitivity 2	1959.23	0.406221	0.162433	2.50086	0.0123893	0.0239697
FBgn0031987	CG12375	uncharacterized protein	517.982	0.359763	0.114169	3.15113	0.00162637	0.0038007
FBgn0031998	SLC5A11	Sodium/solute co-transporter-like 5A11	724.524	0.623037	0.123906	5.02832	4.94804e-07	2.13576e-06
FBgn0032001	CG8360	uncharacterized protein	354.879	0.799902	0.122642	6.52226	6.92562e-11	5.12819e-10
FBgn0032004	CG8292	uncharacterized protein	16.2329	1.60253	0.400846	3.99788	6.39124e-05	0.00019557
FBgn0032006	Pvr	PDGF- and VEGF-receptor related	2826.32	1.56889	0.193416	8.11148	5.00065e-16	7.366e-15
FBgn0032010	CG8086	uncharacterized protein	95.5481	1.75709	0.35689	4.92333	8.50838e-07	3.5669e-06
FBgn0032013	Scgalpha	Sarcoglycan alpha	172.864	1.92334	0.218857	8.78813	1.52075e-18	2.90726e-17
FBgn0032023	CG14274	uncharacterized protein	4.73529	2.34516	0.61575	3.80862	0.000139745	0.000402501
FBgn0032025	CG7778	uncharacterized protein	269.039	2.4496	0.276592	8.85636	8.26661e-19	1.63068e-17
FBgn0032039	CG13385	uncharacterized protein	2.91512	5.41208	1.49708	3.61508	0.000300255	0.000813019
FBgn0032040	CG13386	uncharacterized protein	4.44027	2.49541	0.935611	2.66715	0.00764976	0.0154921
FBgn0032048	Dh31	Diuretic hormone 31	4.69262	4.23973	1.21755	3.48217	0.00049736	0.00129222
FBgn0032055	CG13091	uncharacterized protein	120.029	4.01204	0.537953	7.45798	8.78598e-14	9.58104e-13
FBgn0032074	Tsp29Fa	Tetraspanin 29Fa	166.246	3.07038	0.814608	3.76916	0.000163801	0.000466368
FBgn0032075	Tsp29Fb	Tetraspanin 29Fb	1372.52	3.11947	0.361212	8.63612	5.81523e-18	1.05629e-16
FBgn0032076	Argl	Argininosuccinate lyase	328.308	1.67779	0.169313	9.90945	3.78735e-23	1.09111e-21
FBgn0032079	CG31886	uncharacterized protein	289.589	0.644869	0.236357	2.72837	0.00636483	0.0130954
FBgn0032084	CG13101	uncharacterized protein	183.08	1.45072	0.257408	5.6359	1.74149e-08	9.27099e-08
FBgn0032087	CG9568	uncharacterized protein	61.046	2.48926	0.912601	2.72765	0.0063787	0.0131218
FBgn0032088	CG13102	uncharacterized protein	35.6161	2.82345	0.746365	3.78293	0.000154994	0.000443535
FBgn0032089	Rcd-1r	Rcd-1 related	49.065	2.00123	0.490135	4.08302	4.44537e-05	0.00014009
FBgn0032116	Mco1	Multicopper oxidase 1	48.8014	2.17133	0.501035	4.33368	1.46636e-05	5.00283e-05
FBgn0032124	CG17855	uncharacterized protein	28.3501	2.51282	0.43347	5.797	6.75119e-09	3.77579e-08
FBgn0032129	jp	junctophilin	2039.25	2.26754	0.37474	6.05097	1.43978e-09	8.90019e-09
FBgn0032136	Apoltp	Apolipoprotein lipid transfer particle	331.858	2.20146	0.294093	7.48561	7.12168e-14	7.90533e-13
FBgn0032139	CG13116	uncharacterized protein	126.779	1.94613	0.259838	7.48978	6.89904e-14	7.67193e-13
FBgn0032140	CG13117	uncharacterized protein	485.252	1.91607	0.171249	11.1887	4.62922e-29	2.10834e-27
FBgn0032144	CG17633	uncharacterized protein	59.2632	5.74256	1.5277	3.75896	0.000170622	0.000483896
FBgn0032147	IP3K1	Inositol 1,4,5-triphosphate kinase 1	2366.39	1.10873	0.238954	4.6399	3.48571e-06	1.32011e-05
FBgn0032156	CG13124	uncharacterized protein	4097	2.55271	0.21961	11.6239	3.11696e-31	1.66435e-29
FBgn0032162	CG4592	uncharacterized protein	470.641	1.07718	0.217757	4.94668	7.54893e-07	3.17542e-06
FBgn0032167	CG5853	uncharacterized protein	219.727	1.88459	0.294029	6.40953	1.45968e-10	1.02976e-09
FBgn0032172	CG5850	uncharacterized protein	1436.94	0.343987	0.103097	3.33654	0.000848285	0.00210508
FBgn0032178	Spn31A	Serpin 31A	383.744	2.71349	0.209192	12.9713	1.7809e-38	1.6464e-36
FBgn0032187	CG4839	uncharacterized protein	171.803	1.97886	0.316437	6.25357	4.01167e-10	2.68485e-09
FBgn0032196	CG5708	uncharacterized protein	872.357	0.369169	0.16118	2.29041	0.0219973	0.0401922
FBgn0032210	CYLD	Cylindromatosis	551.771	0.51222	0.128883	3.97432	7.05814e-05	0.00021462
FBgn0032213	CG5390	uncharacterized protein	1000.12	1.36017	0.190122	7.15421	8.41542e-13	8.16368e-12
FBgn0032218	CG5381	uncharacterized protein	826.787	1.83228	0.229761	7.9747	1.52755e-15	2.12383e-14
FBgn0032225	CG5022	uncharacterized protein	35.5788	2.2875	0.32314	7.07898	1.45224e-12	1.36808e-11
FBgn0032230	lft	lowfat	85.0599	1.85716	0.28459	6.52573	6.76702e-11	5.01975e-10
FBgn0032233	dpr19	defective proboscis extension response 19	125.916	1.75104	0.422777	4.14176	3.44648e-05	0.00011058
FBgn0032235	CG5096	uncharacterized protein	178.205	2.38995	0.590829	4.04508	5.23045e-05	0.000162515
FBgn0032252	loh	lonely heart	413.911	1.58079	0.328652	4.80991	1.50996e-06	6.087e-06
FBgn0032264	Lip4	Lipase 4	140.619	1.0958	0.294675	3.71866	0.000200279	0.00056069
FBgn0032283	CG7296	uncharacterized protein	508.882	5.48773	0.376302	14.5833	3.58675e-48	5.62438e-46
FBgn0032284	CG7294	uncharacterized protein	20.4104	4.49141	0.693383	6.47753	9.3234e-11	6.77807e-10
FBgn0032285	CG17108	uncharacterized protein	547.896	1.95487	0.406867	4.8047	1.54985e-06	6.23768e-06
FBgn0032287	CG6415	uncharacterized protein	80.3303	2.02239	0.369658	5.47097	4.47568e-08	2.26305e-07
FBgn0032297	CG17124	uncharacterized protein	470.902	0.398647	0.135365	2.94499	0.00322969	0.00710394
FBgn0032311	CG12517	uncharacterized protein	11.0047	3.29105	1.17241	2.80707	0.00499938	0.0105578
FBgn0032318	CG14072	uncharacterized protein	78.0269	0.703599	0.265161	2.65348	0.00796667	0.0160656
FBgn0032322	CG16743	uncharacterized protein	250.406	3.1025	0.207628	14.9426	1.74174e-50	3.37136e-48
FBgn0032377	CG14937	uncharacterized protein	74.2953	3.41399	0.319737	10.6775	1.29715e-26	4.94434e-25
FBgn0032378	CycY	Cyclin Y	2178.57	0.454729	0.090707	5.01317	5.35417e-07	2.29825e-06
FBgn0032381	Mal-B1	Maltase B1	4.40796	1.97772	0.746062	2.65088	0.00802817	0.0161817
FBgn0032387	CG16965	uncharacterized protein	68.2722	2.33282	0.396874	5.87799	4.1527e-09	2.39495e-08
FBgn0032393	Nfs1	Nfs1 cysteine desulfurase	1616.65	0.263045	0.0837226	3.14186	0.00167878	0.00390622
FBgn0032398	CG6766	uncharacterized protein	1405.55	0.330928	0.123295	2.68403	0.00727405	0.0147868
FBgn0032402	CG14945	uncharacterized protein	220.856	1.41245	0.294174	4.80141	1.57553e-06	6.33074e-06
FBgn0032405	firl	firelighter	92.5116	2.3327	0.465607	5.01001	5.44264e-07	2.3338e-06
FBgn0032407	Pex19	Peroxin 19	2444.02	0.475486	0.0965365	4.92545	8.41646e-07	3.52956e-06
FBgn0032409	Ced-12	Ced-12	749.773	0.372882	0.126235	2.95388	0.00313807	0.00692084
FBgn0032420	CG6583	uncharacterized protein	381.394	1.01477	0.252105	4.0252	5.69264e-05	0.000175826
FBgn0032421	crok	crooked	608.158	0.573831	0.179169	3.20273	0.00136131	0.00322987
FBgn0032422	atilla	atilla	476.344	2.53482	0.219778	11.5336	8.93599e-31	4.63176e-29
FBgn0032424	CG17010	uncharacterized protein	2.30303	4.33395	1.38893	3.12034	0.00180641	0.00418506
FBgn0032433	Oatp33Ea	Organic anion transporting polypeptide 33Ea	124.869	3.7331	1.20651	3.09412	0.00197399	0.00452513
FBgn0032435	Oatp33Eb	Organic anion transporting polypeptide 33Eb	179.833	2.89313	0.7211	4.01211	6.01785e-05	0.000185031
FBgn0032470	Ttc30	Tetratricopeptide repeat domain 30	51.3895	2.7465	0.352102	7.8003	6.176e-15	7.91192e-14
FBgn0032474	DnaJ-H	DnaJ homolog	737.966	0.636399	0.115856	5.49302	3.9511e-08	2.01757e-07
FBgn0032477	CG5287	uncharacterized protein	326.807	0.592383	0.116342	5.09174	3.54796e-07	1.5686e-06
FBgn0032478	CG5458	uncharacterized protein	81.5443	4.0516	0.637692	6.35354	2.1042e-10	1.45869e-09
FBgn0032482	Pect	Phosphoethanolamine cytidylyltransferase	2323.77	0.880315	0.11064	7.95655	1.76908e-15	2.43504e-14
FBgn0032485	CG9426	uncharacterized protein	1048.98	0.298361	0.109131	2.73397	0.00625753	0.0129086
FBgn0032494	CG5945	uncharacterized protein	48.8777	1.4495	0.614271	2.3597	0.0182896	0.0340504
FBgn0032495	CG16820	uncharacterized protein	586.683	0.936998	0.33591	2.78943	0.0052801	0.0110864
FBgn0032515	loqs	loquacious	810.31	1.00981	0.12538	8.05394	8.01703e-16	1.14948e-14
FBgn0032520	CG10859	uncharacterized protein	7.80796	1.4875	0.61412	2.42216	0.0154285	0.0292335
FBgn0032535	Ance-2	Ance-2	6.44115	6.49709	1.00814	6.44463	1.15883e-10	8.3028e-10
FBgn0032536	Ance-3	Ance-3	8.64035	2.92077	0.812654	3.59412	0.000325494	0.000875049
FBgn0032585	Nepl8	Neprilysin-like 8	2.09222	3.43123	1.14853	2.9875	0.00281267	0.00624656
FBgn0032593	Trpgamma	Transient receptor potential cation channel gamma	730.588	2.20721	0.269263	8.19722	2.46016e-16	3.73029e-15
FBgn0032601	yellow-b	yellow-b	81.8584	1.46757	0.44983	3.2625	0.00110435	0.00267097
FBgn0032602	ppk17	pickpocket 17	4.05924	2.70571	0.961365	2.81444	0.00488615	0.010347
FBgn0032603	CG17928	uncharacterized protein	146.937	1.569	0.215296	7.28767	3.15372e-13	3.21022e-12
FBgn0032612	CG13282	uncharacterized protein	583.356	2.55554	0.208517	12.2558	1.56423e-34	1.06471e-32
FBgn0032613	Nepl9	Neprilysin-like 9	55.0882	2.17248	0.378658	5.73732	9.61841e-09	5.26061e-08
FBgn0032614	CG13284	uncharacterized protein	232.81	2.7965	0.306814	9.11464	7.89309e-20	1.68006e-18
FBgn0032615	CG6012	uncharacterized protein	32.12	2.78788	0.775475	3.59507	0.00032431	0.000872054
FBgn0032629	beat-IIIc	beaten path IIIc	1064	2.73361	0.228402	11.9684	5.20209e-33	3.06874e-31
FBgn0032638	SPH93	Serine protease homolog 93	213.396	3.48267	0.355884	9.78596	1.29356e-22	3.46855e-21
FBgn0032639	CG18563	uncharacterized protein	36.557	2.10247	0.452849	4.64276	3.43779e-06	1.30316e-05
FBgn0032652	CG6870	uncharacterized protein	6.01648	3.42262	0.965459	3.54507	0.000392506	0.00103874
FBgn0032660	elfless	elfless	9.86429	3.1018	0.73733	4.2068	2.59008e-05	8.51762e-05
FBgn0032665	CG15152	uncharacterized protein	67.2699	2.39884	0.498553	4.81161	1.49719e-06	6.03749e-06
FBgn0032666	CG5758	uncharacterized protein	2951.17	0.959995	0.211204	4.54533	5.48481e-06	2.01202e-05
FBgn0032668	CG17681	uncharacterized protein	44.5429	1.46829	0.544489	2.69664	0.00700434	0.0142784
FBgn0032669	CG15155	uncharacterized protein	630.596	3.0661	0.465316	6.5893	4.41917e-11	3.36063e-10
FBgn0032670	CG5783	uncharacterized protein	167.75	2.21802	0.176544	12.5635	3.3501e-36	2.5777e-34
FBgn0032682	grnd	grindelwald	81.594	2.77687	0.285713	9.71907	2.50049e-22	6.56272e-21
FBgn0032683	kon	kon-tiki	634.138	2.1049	0.311471	6.75791	1.39993e-11	1.14169e-10
FBgn0032684	Ugt301D1	UDP-glycosyltransferase family 301 member D1	489.548	3.39196	0.239219	14.1793	1.23051e-45	1.69373e-43
FBgn0032685	CG10211	uncharacterized protein	250.304	2.76817	0.266244	10.3971	2.55483e-25	8.74288e-24
FBgn0032689	CG10413	uncharacterized protein	1956.85	1.01678	0.108804	9.34505	9.18501e-21	2.13078e-19
FBgn0032693	Cyp310a1	Cyp310a1	15.6268	1.74275	0.364352	4.78314	1.72575e-06	6.89408e-06
FBgn0032694	MESR3	Misexpression suppressor of ras 3	975.549	1.74487	0.16853	10.3535	4.03426e-25	1.36548e-23
FBgn0032704	Jwa	Jwa	2329.23	0.46674	0.107681	4.33447	1.46113e-05	4.98637e-05
FBgn0032706	Irk3	Inwardly rectifying potassium channel 3	807.253	2.38913	0.513727	4.65057	3.31014e-06	1.26171e-05
FBgn0032713	Ugt36D1	UDP-glycosyltransferase family 36 member D1	918.551	1.42279	0.102123	13.9322	4.03972e-44	5.32383e-42
FBgn0032726	CG10621	uncharacterized protein	309.517	2.46307	0.282316	8.7245	2.67361e-18	5.0472e-17
FBgn0032729	L2HGDH	L-2-hydroxyglutarate dehydrogenase	1132.32	0.760011	0.126912	5.98847	2.11829e-09	1.27509e-08
FBgn0032731	Swip-1	Swiprosin-1	1330.02	0.999163	0.204138	4.89456	9.85268e-07	4.08484e-06
FBgn0032744	Ttc19	Tetratricopeptide repeat domain 19	236.788	0.661021	0.145812	4.53337	5.80487e-06	2.12063e-05
FBgn0032770	CG13086	uncharacterized protein	93.8664	2.29138	0.409801	5.59144	2.2519e-08	1.18206e-07
FBgn0032772	CG17350	uncharacterized protein	239.681	4.83728	0.306335	15.7908	3.59953e-56	7.82297e-54
FBgn0032773	fon	fondue	1059.35	2.06396	0.314617	6.56022	5.37295e-11	4.04375e-10
FBgn0032774	CG17549	uncharacterized protein	1038.97	4.49222	0.193408	23.2267	2.44863e-119	6.06672e-116
FBgn0032775	CG17544	uncharacterized protein	1622.42	1.96505	0.191583	10.2569	1.10169e-24	3.5821e-23
FBgn0032779	Alp12	Alkaline phosphatase 12	520.341	0.967439	0.294547	3.2845	0.00102165	0.00248551
FBgn0032780	CG13085	uncharacterized protein	40.8398	1.1715	0.262816	4.45747	8.29312e-06	2.94877e-05
FBgn0032785	CG10026	uncharacterized protein	89.614	1.80514	0.350853	5.14502	2.67497e-07	1.20369e-06
FBgn0032798	CG10132	uncharacterized protein	534.084	2.73367	0.441211	6.19583	5.79786e-10	3.78818e-09
FBgn0032800	CG10137	uncharacterized protein	204.086	1.00842	0.352746	2.85876	0.00425296	0.00911202
FBgn0032803	CG13082	uncharacterized protein	1682.15	2.27925	0.21676	10.5151	7.35997e-26	2.66594e-24
FBgn0032810	CG13077	uncharacterized protein	40.1384	2.95661	0.418644	7.06236	1.63702e-12	1.53052e-11
FBgn0032813	PCNA2	Proliferating cell nuclear antigen 2	43.7568	2.17538	0.298062	7.29842	2.91157e-13	2.98581e-12
FBgn0032820	fbp	fructose-1,6-bisphosphatase	1173.47	1.3796	0.150108	9.19066	3.90441e-20	8.57586e-19
FBgn0032821	CdGAPr	Cd GTPase activating protein-related	1700.23	0.643367	0.208733	3.08225	0.0020544	0.00469468
FBgn0032824	CG13962	uncharacterized protein	43.1358	3.34574	0.739191	4.52621	6.00507e-06	2.18925e-05
FBgn0032827	CG10481	uncharacterized protein	2.30558	2.86001	1.12951	2.53207	0.0113391	0.0220858
FBgn0032836	CG10680	uncharacterized protein	348.238	1.11018	0.334645	3.3175	0.000908268	0.00223379
FBgn0032843	CG10730	uncharacterized protein	19.089	1.26705	0.366009	3.46181	0.000536556	0.00138274
FBgn0032850	Kua	Kua	36.2191	2.07971	0.337616	6.15997	7.27595e-10	4.68718e-09
FBgn0032856	CG16798	uncharacterized protein	2.33787	2.75589	1.01711	2.70952	0.00673814	0.0137948
FBgn0032857	CG10947	uncharacterized protein	101.61	2.15861	0.365432	5.907	3.48385e-09	2.04219e-08
FBgn0032880	TM9SF2	Transmembrane 9 superfamily protein member 2	3415.86	0.431833	0.105076	4.10973	3.96122e-05	0.000125889
FBgn0032881	Amacr	Alpha-methylacyl-CoA racemase	465.907	0.416006	0.129222	3.21932	0.00128494	0.00306171
FBgn0032882	Ns4	Nucleostemin 4	777.038	0.241245	0.0812454	2.96934	0.00298442	0.0066055
FBgn0032889	CG9331	uncharacterized protein	1656.88	2.30142	0.291236	7.90223	2.73948e-15	3.69278e-14
FBgn0032896	CG14400	uncharacterized protein	25.8911	1.73824	0.417599	4.16247	3.1482e-05	0.000101721
FBgn0032897	CG9336	uncharacterized protein	2010.2	2.80202	0.243177	11.5225	1.01573e-30	5.22109e-29
FBgn0032899	CG9338	uncharacterized protein	1639.89	2.21179	0.150625	14.6841	8.15112e-49	1.33488e-46
FBgn0032900	CG14401	uncharacterized protein	270.354	2.79469	0.208231	13.4211	4.54819e-41	5.03062e-39
FBgn0032908	CG9270	uncharacterized protein	225.315	1.4844	0.539256	2.75267	0.00591106	0.0122657
FBgn0032911	tadr	torn and diminished rhabdomeres	64.4048	2.03765	0.368293	5.53268	3.15381e-08	1.62857e-07
FBgn0032913	CG9259	uncharacterized protein	1366.09	4.17636	0.628578	6.64415	3.04982e-11	2.3628e-10
FBgn0032935	Atg18b	Autophagy-related 18b	256.718	0.578052	0.199344	2.89977	0.00373438	0.00809192
FBgn0032945	CG8665	uncharacterized protein	83.6484	2.75743	0.403855	6.82777	8.62426e-12	7.2383e-11
FBgn0032946	nrv3	nervana 3	228.172	0.984629	0.322655	3.05165	0.00227588	0.00514577
FBgn0032949	Lamp1	Lamp1	5487.2	0.920582	0.188155	4.89269	9.94681e-07	4.12111e-06
FBgn0032973	CG6675	uncharacterized protein	44.6271	1.00123	0.428323	2.33757	0.0194097	0.0359467
FBgn0032981	CG3635	uncharacterized protein	17.2496	3.12304	0.484519	6.44566	1.151e-10	8.25628e-10
FBgn0033027	TpnC4	Troponin C isoform 4	37.9322	1.5294	0.672933	2.27274	0.0230417	0.0418964
FBgn0033032	kune	kune-kune	720.386	1.5393	0.171738	8.9631	3.15682e-19	6.36917e-18
FBgn0033047	CG7882	uncharacterized protein	2290.25	2.82271	0.514704	5.48415	4.15461e-08	2.11452e-07
FBgn0033048	CG7881	uncharacterized protein	178.922	1.70599	0.515545	3.3091	0.000935948	0.00229504
FBgn0033054	CG14591	uncharacterized protein	22.5976	2.63208	0.493817	5.33006	9.81819e-08	4.69062e-07
FBgn0033055	Tbce	Tubulin-specific chaperone E	888.757	0.442549	0.12657	3.49648	0.000471441	0.00122874
FBgn0033061	SmydA-5	SET and MYND domain containing, arthropod-specific, member 5	50.6985	1.07875	0.325848	3.31059	0.000930989	0.00228333
FBgn0033063	CG14589	uncharacterized protein	7.42351	1.65823	0.497349	3.33414	0.000855644	0.00211994
FBgn0033065	Cyp6w1	Cyp6w1	40.5678	1.267	0.406538	3.11656	0.00182976	0.0042313
FBgn0033069	eIF3f2	eukaryotic translation initiation factor 3 subunit f2	4.71256	3.74878	1.08409	3.45798	0.000544232	0.00139991
FBgn0033079	Fmo-2	Flavin-containing monooxygenase 2	975.893	2.19338	0.247846	8.84978	8.76889e-19	1.72427e-17
FBgn0033093	CG3270	uncharacterized protein	2232.14	3.06531	0.389425	7.87136	3.50809e-15	4.65291e-14
FBgn0033097	Zip42C.2	Zinc/iron regulated transporter-related protein 42C.2	6.64352	4.6826	1.39968	3.34549	0.000821386	0.00204406
FBgn0033101	CG9436	uncharacterized protein	1191.15	0.919292	0.139437	6.59286	4.31421e-11	3.28485e-10
FBgn0033104	CG15237	uncharacterized protein	298.66	0.448892	0.196206	2.28786	0.0221459	0.0404339
FBgn0033113	Spn42Dc	Serpin 42Dc	103.815	1.66323	0.244125	6.81305	9.55535e-12	7.97653e-11
FBgn0033124	Tsp42Ec	Tetraspanin 42Ec	83.2655	2.83105	0.872775	3.24373	0.00117974	0.00283064
FBgn0033127	Tsp42Ef	Tetraspanin 42Ef	1047.87	1.56017	0.138256	11.2847	1.56166e-29	7.35584e-28
FBgn0033128	Tsp42Eg	Tetraspanin 42Eg	2155.49	2.25213	0.214459	10.5014	8.50734e-26	3.05475e-24
FBgn0033129	Tsp42Eh	Tetraspanin 42Eh	28.0773	3.28912	0.400636	8.20975	2.21655e-16	3.37859e-15
FBgn0033130	Tsp42Ei	Tetraspanin 42Ei	156.379	2.57471	0.250675	10.2711	9.51063e-25	3.10047e-23
FBgn0033132	Tsp42Ej	Tetraspanin 42Ej	116.496	3.22665	0.430537	7.49448	6.65602e-14	7.415e-13
FBgn0033133	Tsp42Ek	Tetraspanin 42Ek	80.8032	2.86997	0.451617	6.35489	2.08573e-10	1.44751e-09
FBgn0033134	Tsp42El	Tetraspanin 42El	399.54	2.73366	0.342643	7.97817	1.48515e-15	2.06719e-14
FBgn0033135	Tsp42En	Tetraspanin 42En	325.531	1.64226	0.198119	8.28927	1.13948e-16	1.80509e-15
FBgn0033136	Tsp42Eo	Tetraspanin 42Eo	127.169	3.30425	0.191	17.2997	4.72828e-67	1.46435e-64
FBgn0033137	Tsp42Ep	Tetraspanin 42Ep	81.3276	2.20204	0.478009	4.60669	4.09131e-06	1.53539e-05
FBgn0033138	Tsp42Eq	Tetraspanin 42Eq	153.605	3.12932	0.536119	5.83698	5.31549e-09	3.0109e-08
FBgn0033139	Tsp42Er	Tetraspanin 42Er	34.7175	3.03443	0.573343	5.29252	1.20641e-07	5.68467e-07
FBgn0033153	Gadd45	Growth arrest and DNA damage-inducible 45	546.664	0.977274	0.216114	4.52202	6.12516e-06	2.2291e-05
FBgn0033158	CG12164	uncharacterized protein	31.3418	3.2892	0.417527	7.87781	3.3317e-15	4.4332e-14
FBgn0033159	Dscam1	Down syndrome cell adhesion molecule 1	642.775	2.41305	0.39143	6.1647	7.06168e-10	4.55388e-09
FBgn0033170	sPLA2	secretory Phospholipase A2	62.0892	0.807729	0.262885	3.07255	0.00212237	0.00483664
FBgn0033188	Drat	Death resistor Adh domain containing target	1922.29	1.54432	0.296718	5.20467	1.94346e-07	8.89896e-07
FBgn0033192	Corin	corin	90.9764	1.28887	0.230853	5.58308	2.36291e-08	1.23833e-07
FBgn0033205	CG2064	uncharacterized protein	406.968	1.90355	0.296193	6.42671	1.30393e-10	9.24089e-10
FBgn0033206	DCTN4-p62	Dynactin 4, p62 subunit	658.414	0.410251	0.0844384	4.85858	1.18231e-06	4.83701e-06
FBgn0033212	LRR	Leucine-rich repeat	1594.48	0.508703	0.169896	2.9942	0.00275164	0.00612862
FBgn0033214	CG1941	uncharacterized protein	28.3839	2.19974	0.576643	3.81474	0.000136325	0.000393567
FBgn0033216	CG1946	uncharacterized protein	4.52378	4.07298	1.4659	2.77849	0.00546119	0.0114163
FBgn0033221	CG12825	uncharacterized protein	313.958	2.48924	0.381102	6.53169	6.50307e-11	4.84426e-10
FBgn0033222	CG12824	uncharacterized protein	104.211	2.33718	0.477496	4.89467	9.84702e-07	4.08386e-06
FBgn0033226	CG1882	uncharacterized protein	890.294	0.715206	0.0826787	8.65043	5.13067e-18	9.36065e-17
FBgn0033232	CG12159	uncharacterized protein	618.691	0.887928	0.167608	5.29764	1.17306e-07	5.55076e-07
FBgn0033234	MFS12	Major Facilitator Superfamily Transporter 12	291.134	1.03085	0.341461	3.01894	0.00253659	0.00567822
FBgn0033252	CG12769	uncharacterized protein	270.485	0.982728	0.205101	4.79143	1.65601e-06	6.63475e-06
FBgn0033257	sand	sandman	243.56	1.70656	0.142504	11.9755	4.77331e-33	2.82927e-31
FBgn0033259	CG11210	uncharacterized protein	812.663	0.671361	0.091412	7.34434	2.06771e-13	2.15069e-12
FBgn0033261	udd	under-developed	621.384	0.631596	0.256582	2.46158	0.0138328	0.0264724
FBgn0033266	Socs44A	Suppressor of Cytokine Signaling at 44A	824.719	0.242325	0.0730753	3.3161	0.000912827	0.00224367
FBgn0033272	RagC-D	Ras-related GTP binding C/D	943.612	0.35643	0.0863375	4.12833	3.65401e-05	0.000116755
FBgn0033274	CG14757	uncharacterized protein	112.354	1.31294	0.218316	6.01393	1.81081e-09	1.09801e-08
FBgn0033275	CG14756	uncharacterized protein	2.86276	2.13726	0.83864	2.54849	0.0108192	0.0211434
FBgn0033277	CG14760	uncharacterized protein	1.24762	3.02051	1.37335	2.19937	0.0278517	0.0497013
FBgn0033283	CG11635	uncharacterized protein	2.06971	2.94342	1.33532	2.20428	0.0275047	0.0491388
FBgn0033286	CG2127	uncharacterized protein	12.2726	3.57505	1.34427	2.65946	0.00782649	0.015819
FBgn0033289	CG2121	uncharacterized protein	5.14235	2.3074	0.925157	2.49407	0.0126289	0.0243611
FBgn0033292	Cyp4ad1	Cyp4ad1	10.0787	3.01507	0.755501	3.99082	6.58444e-05	0.000200956
FBgn0033301	CG12780	uncharacterized protein	69.5885	2.89416	0.820316	3.5281	0.000418551	0.00110062
FBgn0033302	Cyp6a14	Cyp6a14	161.536	1.33297	0.355832	3.74606	0.000179636	0.00050691
FBgn0033303	NA	NA	4.79951	1.87273	0.668422	2.80171	0.00508321	0.0107232
FBgn0033304	Cyp6a13	Cyp6a13	499.09	2.13337	0.103999	20.5133	1.63671e-93	1.68963e-90
FBgn0033309	Lnpk	Lunapark	1217.2	0.286969	0.0940174	3.0523	0.00227096	0.00513744
FBgn0033312	CG8642	uncharacterized protein	54.8178	1.24605	0.319793	3.89642	9.7625e-05	0.000289256
FBgn0033313	Cirl	Calcium-independent receptor for alpha-latrotoxin	5857.04	1.11195	0.359711	3.09122	0.00199333	0.00456355
FBgn0033320	CG8586	uncharacterized protein	395.439	2.7211	0.205316	13.2532	4.32331e-40	4.46309e-38
FBgn0033321	CG8738	uncharacterized protein	145.045	2.56748	0.224556	11.4336	2.84113e-30	1.42494e-28
FBgn0033355	CG13748	uncharacterized protein	5.74261	1.84524	0.826184	2.23345	0.025519	0.0459491
FBgn0033358	spab	space blanket	11.0196	2.0783	0.498485	4.16924	3.05623e-05	9.90596e-05
FBgn0033366	Ance-4	Ance-4	142.993	3.31529	0.351648	9.42787	4.18514e-21	9.95115e-20
FBgn0033367	PPO2	Prophenoloxidase 2	149.215	3.27391	1.22343	2.67601	0.00745044	0.0151156
FBgn0033382	Hydr1	alpha/beta hydrolase 1	982.595	1.16843	0.111696	10.4608	1.30685e-25	4.56036e-24
FBgn0033387	CG8008	uncharacterized protein	700.663	2.8428	0.178952	15.8858	7.94383e-57	1.78924e-54
FBgn0033388	CG8046	uncharacterized protein	46.3235	1.98569	0.314714	6.3095	2.79929e-10	1.91061e-09
FBgn0033397	Cyp4p3	Cyp4p3	76.467	2.66603	0.573284	4.65045	3.31212e-06	1.26171e-05
FBgn0033423	Alp6	Alkaline phosphatase 6	13.0032	1.93861	0.465494	4.16464	3.11847e-05	0.000100866
FBgn0033426	CG1814	uncharacterized protein	719.658	0.23987	0.097311	2.46498	0.0137019	0.0262429
FBgn0033431	CG1827	uncharacterized protein	404.882	0.964073	0.150371	6.4113	1.44287e-10	1.01906e-09
FBgn0033434	CG1902	uncharacterized protein	1067.22	0.876894	0.1637	5.35672	8.47466e-08	4.09295e-07
FBgn0033437	CG12926	uncharacterized protein	139.404	2.36859	0.439324	5.39145	6.98931e-08	3.42092e-07
FBgn0033438	Mmp2	Matrix metalloproteinase 2	1124.46	2.21898	0.240348	9.23235	2.64746e-20	5.87755e-19
FBgn0033442	CG1690	uncharacterized protein	2.88298	3.3858	1.28064	2.64384	0.00819724	0.0165064
FBgn0033443	CG1698	uncharacterized protein	357.083	3.57352	0.208466	17.142	7.21606e-66	2.12839e-63
FBgn0033446	CG1648	uncharacterized protein	3685.47	2.67169	0.164343	16.2568	1.99988e-59	5.05604e-57
FBgn0033447	dila	dilatory	10.5652	3.43427	0.641166	5.35629	8.495e-08	4.10117e-07
FBgn0033448	hebe	hebe	883.066	3.03716	0.31988	9.49468	2.20886e-21	5.44004e-20
FBgn0033453	Sting	sting	685.55	0.9512	0.132976	7.15315	8.48062e-13	8.21407e-12
FBgn0033464	CG1441	uncharacterized protein	16.4308	1.71663	0.702243	2.4445	0.0145055	0.0276154
FBgn0033468	CG1418	uncharacterized protein	405.732	0.847247	0.198189	4.27494	1.91186e-05	6.41324e-05
FBgn0033481	CG12920	uncharacterized protein	14.979	1.28516	0.354979	3.62039	0.000294162	0.000797916
FBgn0033483	egr	eiger	812.224	2.12255	0.228841	9.27521	1.77273e-20	4.02208e-19
FBgn0033484	CG2269	uncharacterized protein	23.1083	3.42458	0.47778	7.16769	7.62726e-13	7.44574e-12
FBgn0033490	CG12917	uncharacterized protein	3.94553	2.38361	0.940045	2.53564	0.0112243	0.0218765
FBgn0033494	KCNQ	KCNQ potassium channel	648.696	1.36707	0.406044	3.36682	0.000760411	0.00190533
FBgn0033498	CG12209	uncharacterized protein	2.21315	3.3103	1.30303	2.54046	0.0110705	0.0215971
FBgn0033502	CG12910	uncharacterized protein	50.2794	2.68175	0.337193	7.95316	1.81807e-15	2.4997e-14
FBgn0033504	CAP	CAP	2931.41	1.90624	0.193323	9.86036	6.18285e-23	1.73681e-21
FBgn0033518	Prx2540-2	Peroxiredoxin 2540-2	305.894	2.23067	0.33823	6.59512	4.24917e-11	3.23931e-10
FBgn0033520	Prx2540-1	Peroxiredoxin 2540-1	1023.36	1.44652	0.295053	4.90258	9.4584e-07	3.9319e-06
FBgn0033521	CG12896	uncharacterized protein	540.673	1.26422	0.346269	3.65099	0.00026123	0.000717499
FBgn0033524	Cyp49a1	Cyp49a1	32.6488	1.0729	0.458483	2.34012	0.0192777	0.0357289
FBgn0033539	Git	G protein-coupled receptor kinase interacting ArfGAP	985.828	0.593288	0.15731	3.77147	0.000162289	0.000462806
FBgn0033542	CAH13	Carbonic anhydrase 13	3.29041	2.69275	1.21032	2.22483	0.0260929	0.0468978
FBgn0033543	CG12338	uncharacterized protein	382.415	0.932619	0.164397	5.67297	1.40345e-08	7.55175e-08
FBgn0033544	CG7220	uncharacterized protein	1664.73	0.533477	0.0926853	5.75579	8.6239e-09	4.75446e-08
FBgn0033558	CG12344	uncharacterized protein	59.1365	0.769447	0.271347	2.83566	0.00457314	0.00973069
FBgn0033574	Spn47C	Serpin 47C	32.5827	2.02024	0.724626	2.78798	0.00530379	0.0111324
FBgn0033584	CG7737	uncharacterized protein	1493.71	0.396548	0.116364	3.40782	0.000654842	0.0016586
FBgn0033600	Cpr47Ec	Cuticular protein 47Ec	3.1577	5.39041	1.28881	4.18245	2.88379e-05	9.39452e-05
FBgn0033627	CG13204	uncharacterized protein	236.409	1.09985	0.300392	3.6614	0.00025084	0.000690843
FBgn0033628	CG13203	uncharacterized protein	1.77424	4.15693	1.4289	2.90918	0.00362382	0.00787301
FBgn0033633	Smyd4-3	SET and MYND domain containing, class 4, member 3	128.974	2.52472	0.252696	9.99114	1.66647e-23	4.99862e-22
FBgn0033635	Prip	prip	14479.4	1.58817	0.136756	11.6131	3.53406e-31	1.86297e-29
FBgn0033644	Tret1-2	Trehalose transporter 1-2	11.0808	2.41854	0.674264	3.58693	0.000334589	0.000897744
FBgn0033645	CG13196	uncharacterized protein	24.0579	1.62666	0.377446	4.30966	1.63507e-05	5.53119e-05
FBgn0033652	ths	thisbe	777.648	1.66114	0.371567	4.47065	7.79829e-06	2.78401e-05
FBgn0033657	Sln	Silnoon	14.3833	1.16719	0.483261	2.41525	0.0157246	0.0297444
FBgn0033658	Twdlbeta	Tweedlebeta	163.318	2.76592	0.208044	13.2949	2.47809e-40	2.60157e-38
FBgn0033659	Damm	Death associated molecule related to Mch2 caspase	98.4403	1.35828	0.559099	2.4294	0.0151236	0.0287217
FBgn0033663	ERp60	Endoplasmic reticulum p60	15959.6	0.25804	0.104557	2.46793	0.0135896	0.0260561
FBgn0033665	Zip48C	Zinc/iron regulated transporter-related protein 48C	627.605	1.04077	0.141007	7.38099	1.57112e-13	1.66067e-12
FBgn0033667	reb	rebuf	6.17295	2.39885	0.875309	2.74057	0.0061333	0.0126738
FBgn0033677	CG8321	uncharacterized protein	804.126	0.45012	0.165931	2.71269	0.00667401	0.0136793
FBgn0033679	CG8888	uncharacterized protein	1710.2	2.66027	0.257879	10.316	5.96647e-25	1.98157e-23
FBgn0033687	CG8407	uncharacterized protein	18.8563	1.38043	0.397608	3.47185	0.000516891	0.00133679
FBgn0033702	CG8854	uncharacterized protein	115.555	2.85028	0.288932	9.86488	5.9107e-23	1.66413e-21
FBgn0033710	CG17739	uncharacterized protein	465.553	1.94092	0.198518	9.77705	1.41265e-22	3.77154e-21
FBgn0033717	CG8839	uncharacterized protein	3025.45	1.73957	0.119342	14.5764	3.97037e-48	6.07222e-46
FBgn0033723	CG13155	uncharacterized protein	25.3132	5.02066	0.820758	6.1171	9.52923e-10	6.01979e-09
FBgn0033724	CG8501	uncharacterized protein	127.288	2.88096	0.37441	7.69467	1.41861e-14	1.73826e-13
FBgn0033725	Cpr49Ac	Cuticular protein 49Ac	133.174	2.85267	0.610424	4.67326	2.9645e-06	1.14086e-05
FBgn0033728	Cpr49Ae	Cuticular protein 49Ae	319.153	4.30226	0.467124	9.2101	3.25817e-20	7.16914e-19
FBgn0033731	Cpr49Ah	Cuticular protein 49Ah	11.632	4.12256	0.771864	5.34105	9.24098e-08	4.43538e-07
FBgn0033733	CG8834	uncharacterized protein	463.785	6.34667	1.40247	4.52535	6.02951e-06	2.19752e-05
FBgn0033751	CG8818	uncharacterized protein	1249.09	0.593687	0.111305	5.3339	9.61272e-08	4.60311e-07
FBgn0033753	Cyp301a1	Cyp301a1	106.493	2.4333	0.317075	7.67423	1.66419e-14	2.02316e-13
FBgn0033760	CG8785	uncharacterized protein	361.065	1.91221	0.302094	6.32987	2.45365e-10	1.68772e-09
FBgn0033763	CG8646	uncharacterized protein	26.1139	2.4455	0.378151	6.467	9.99697e-11	7.23379e-10
FBgn0033774	CG12374	uncharacterized protein	175.291	5.84985	1.29437	4.51945	6.20012e-06	2.25373e-05
FBgn0033775	Cyp9h1	Cyp9h1	29.9891	3.25007	0.627462	5.17971	2.22225e-07	1.00914e-06
FBgn0033777	CG17574	uncharacterized protein	890.049	0.952094	0.170102	5.59719	2.1786e-08	1.14601e-07
FBgn0033782	sug	sugarbabe	87.8068	2.22278	0.409287	5.43086	5.60826e-08	2.78346e-07
FBgn0033787	CG13321	uncharacterized protein	732.397	3.20136	0.838958	3.81587	0.000135701	0.000391949
FBgn0033788	CG13323	uncharacterized protein	487.89	2.91197	0.820776	3.54782	0.000388432	0.00102906
FBgn0033789	CG13324	uncharacterized protein	37.6835	2.15732	0.756859	2.85036	0.00436695	0.00933202
FBgn0033792	CG13325	uncharacterized protein	40.8135	4.37405	1.9905	2.19747	0.0279872	0.0498928
FBgn0033793	CG3955	uncharacterized protein	3.12138	2.88697	0.930351	3.1031	0.00191506	0.0044047
FBgn0033807	AQP	aquaporin	179.523	2.54212	0.3889	6.5367	6.28924e-11	4.6991e-10
FBgn0033809	CG4630	uncharacterized protein	95.1063	1.77334	0.175973	10.0773	6.95894e-24	2.17147e-22
FBgn0033812	Pex13	Peroxin 13	971.941	0.273841	0.0933418	2.93374	0.00334903	0.00734037
FBgn0033814	Qsox1	Quiescin sulfhydryl oxidase 1	2166.21	1.8979	0.13425	14.137	2.24535e-45	3.05664e-43
FBgn0033815	CG4676	uncharacterized protein	17.5117	0.886353	0.353778	2.50539	0.0122315	0.0236868
FBgn0033820	CG4716	uncharacterized protein	208.994	1.58186	0.420032	3.76605	0.000165848	0.000471654
FBgn0033821	CG10799	uncharacterized protein	46.9035	2.82087	0.376938	7.48365	7.22889e-14	8.01714e-13
FBgn0033827	CG17047	uncharacterized protein	1.75316	4.95247	1.71532	2.8872	0.00388684	0.00839731
FBgn0033848	CG13330	uncharacterized protein	3.7253	4.50108	1.64718	2.73259	0.00628386	0.0129525
FBgn0033850	CG13331	uncharacterized protein	12.6404	4.21211	0.620261	6.79086	1.1147e-11	9.20596e-11
FBgn0033851	CG13332	uncharacterized protein	7.81011	4.88262	0.880972	5.54231	2.9851e-08	1.54725e-07
FBgn0033853	CG6145	uncharacterized protein	796.986	0.241901	0.0777619	3.11079	0.0018659	0.00430603
FBgn0033860	S-Lap5	Sperm-Leucylaminopeptidase 5	4.39986	2.00523	0.827736	2.42255	0.0154122	0.029207
FBgn0033865	CG6220	uncharacterized protein	7.53133	1.35863	0.510987	2.65884	0.00784113	0.0158408
FBgn0033869	Cpr50Cb	Cuticular protein 50Cb	16.0453	2.06745	0.814988	2.53679	0.0111874	0.021808
FBgn0033872	CG6329	uncharacterized protein	273.671	1.80226	0.280368	6.42819	1.29135e-10	9.1727e-10
FBgn0033873	CG6337	uncharacterized protein	59.8946	2.65625	0.970351	2.73741	0.00619252	0.0127855
FBgn0033875	CG6357	uncharacterized protein	3056.41	2.44811	0.201637	12.1412	6.39037e-34	4.05969e-32
FBgn0033880	CG6553	uncharacterized protein	237.058	1.40437	0.422434	3.32446	0.00088589	0.00218824
FBgn0033883	CG16935	uncharacterized protein	1337.96	0.435487	0.144616	3.01134	0.002601	0.00581295
FBgn0033885	DJ-1alpha	DJ-1alpha	4.55285	1.86826	0.724629	2.57823	0.00993088	0.0196179
FBgn0033903	CG8323	uncharacterized protein	595.156	1.8344	0.235403	7.79261	6.56367e-15	8.36531e-14
FBgn0033904	CG18327	uncharacterized protein	284.858	2.42203	0.382489	6.3323	2.41533e-10	1.66314e-09
FBgn0033905	CG18324	uncharacterized protein	689.971	1.10706	0.149116	7.42415	1.13508e-13	1.21638e-12
FBgn0033911	VGAT	Vesicular GABA Transporter	1.7161	3.62292	1.40625	2.57629	0.00998661	0.0197185
FBgn0033913	CG8468	uncharacterized protein	520.861	3.01295	0.421857	7.1421	9.19152e-13	8.87487e-12
FBgn0033915	CG8485	uncharacterized protein	1297.82	0.24243	0.0797025	3.04169	0.00235255	0.00530169
FBgn0033919	CG8547	uncharacterized protein	2944.6	2.49407	0.257931	9.66951	4.06315e-22	1.04863e-20
FBgn0033928	Arc2	Arc2	189.586	1.05069	0.205488	5.11316	3.16817e-07	1.40873e-06
FBgn0033936	Achl	Achilles	470.67	2.56079	0.370369	6.91416	4.70646e-12	4.11168e-11
FBgn0033942	Cpr51A	Cuticular protein 51A	17.6857	1.59286	0.384314	4.14468	3.40288e-05	0.000109249
FBgn0033943	CG12869	uncharacterized protein	16.049	1.28909	0.360424	3.57659	0.000348109	0.000930595
FBgn0033949	Had2	beta Hydroxy acid dehydrogenase 2	411.666	1.8887	0.379837	4.97241	6.61257e-07	2.79961e-06
FBgn0033958	jef	jet fuel	6.39576	2.39055	0.758947	3.14983	0.00163367	0.00381559
FBgn0033978	Cyp6a23	Cyp6a23	469.197	0.84804	0.291796	2.90628	0.00365757	0.00793937
FBgn0033981	Cyp6a21	Cyp6a21	34.2062	2.712	0.490291	5.53141	3.17661e-08	1.63966e-07
FBgn0033982	Cyp317a1	Cyp317a1	149.932	1.5813	0.185748	8.51315	1.69269e-17	2.92863e-16
FBgn0033983	ADPS	Alkyldihydroxyacetonephosphate synthase	26.6125	2.73609	0.450305	6.07609	1.23149e-09	7.65847e-09
FBgn0033985	CG10257	uncharacterized protein	5.3168	1.70229	0.550537	3.09205	0.00198777	0.00455336
FBgn0033987	ckn	caskin	1455.49	0.942937	0.29457	3.20106	0.00136922	0.00324692
FBgn0034002	CG8079	uncharacterized protein	601.01	0.363759	0.117605	3.09305	0.00198108	0.00453886
FBgn0034005	ItgaPS4	Integrin alphaPS4 subunit	11.1261	2.60066	0.464294	5.60133	2.12711e-08	1.12083e-07
FBgn0034010	CG8157	uncharacterized protein	462.206	2.95259	0.327902	9.0045	2.16654e-19	4.45832e-18
FBgn0034011	CG8160	uncharacterized protein	75.0043	6.87642	0.634927	10.8302	2.47497e-27	9.82689e-26
FBgn0034013	unc-5	unc-5	101.324	1.72713	0.317284	5.44349	5.22457e-08	2.60661e-07
FBgn0034030	CG8192	uncharacterized protein	46.7679	1.8398	0.346707	5.30649	1.11754e-07	5.31037e-07
FBgn0034031	CG12963	uncharacterized protein	212.765	2.93711	0.50881	5.77251	7.81015e-09	4.32315e-08
FBgn0034035	CG8207	uncharacterized protein	699.421	0.32311	0.0812886	3.97485	7.04237e-05	0.000214193
FBgn0034045	CG8249	uncharacterized protein	163.022	2.09489	0.410186	5.10717	3.27024e-07	1.45255e-06
FBgn0034053	Cyp4aa1	Cyp4aa1	11.5024	3.17843	0.757171	4.19777	2.69554e-05	8.83162e-05
FBgn0034063	CG8389	uncharacterized protein	445.977	0.665431	0.116733	5.70046	1.19483e-08	6.47202e-08
FBgn0034067	CG8399	uncharacterized protein	1256.7	0.98673	0.136707	7.21785	5.28163e-13	5.23012e-12
FBgn0034072	Dg	Dystroglycan	6834.29	0.443818	0.172508	2.57274	0.0100898	0.0198968
FBgn0034075	Asph	Aspartyl beta-hydroxylase	2763.07	0.728928	0.300089	2.42904	0.0151387	0.028746
FBgn0034083	lbk	lambik	1957.95	0.862663	0.182652	4.72298	2.32417e-06	9.10558e-06
FBgn0034085	Ptp52F	Protein tyrosine phosphatase 52F	227.591	2.5059	0.326909	7.66543	1.78237e-14	2.15415e-13
FBgn0034092	CG7798	uncharacterized protein	1.3628	4.68068	1.68164	2.78341	0.00537913	0.0112752
FBgn0034093	CG15706	uncharacterized protein	526.217	0.713175	0.142879	4.99145	5.99292e-07	2.55385e-06
FBgn0034094	Tsf3	Transferrin 3	69.0467	1.87758	0.321397	5.84194	5.15955e-09	2.9306e-08
FBgn0034110	Atg9	Autophagy-related 9	709.786	0.750462	0.118189	6.34967	2.15781e-10	1.49502e-09
FBgn0034126	jtb	jetboil	188.216	0.875448	0.313575	2.79183	0.00524106	0.0110119
FBgn0034132	S-Lap8	Sperm-Leucylaminopeptidase 8	8.70116	3.78712	1.64477	2.30252	0.0213057	0.0390668
FBgn0034135	Syn2	Syntrophin-like 2	85.8978	3.59192	0.36271	9.903	4.03975e-23	1.16112e-21
FBgn0034137	CG4945	uncharacterized protein	390.808	2.44731	0.17748	13.7892	2.96019e-43	3.70412e-41
FBgn0034139	CG4927	uncharacterized protein	15.4268	2.33909	0.560764	4.17126	3.02918e-05	9.82857e-05
FBgn0034140	Lst	Limostatin	67.2517	1.86725	0.514641	3.62826	0.000285343	0.000776715
FBgn0034142	CG8306	uncharacterized protein	1089.98	1.03953	0.162447	6.39918	1.56211e-10	1.09889e-09
FBgn0034145	CG5065	uncharacterized protein	744.246	2.20189	0.268141	8.21169	2.18096e-16	3.33552e-15
FBgn0034160	CG5550	uncharacterized protein	10.2961	2.87375	0.960025	2.99342	0.00275874	0.00614222
FBgn0034162	CG6426	uncharacterized protein	360.283	2.04242	0.242065	8.43751	3.24157e-17	5.50091e-16
FBgn0034165	CG6435	uncharacterized protein	5.70623	1.98724	0.833408	2.38448	0.0171034	0.0320249
FBgn0034166	CG6472	uncharacterized protein	76.4185	1.65649	0.382367	4.33221	1.47623e-05	5.03373e-05
FBgn0034168	CG15614	uncharacterized protein	2.28661	4.37498	1.38235	3.16489	0.00155142	0.00363737
FBgn0034172	CG6665	uncharacterized protein	438.968	0.46907	0.130456	3.59563	0.000323613	0.000870557
FBgn0034179	CG6805	uncharacterized protein	435.197	0.525674	0.135659	3.87497	0.000106636	0.000313778
FBgn0034180	Ehbp1	Eps15 homology domain containing protein-binding protein 1	1298.05	0.557324	0.18927	2.94461	0.00323366	0.00711015
FBgn0034182	SmydA-7	SET and MYND domain containing, arthropod-specific, member 7	104.197	1.03105	0.264272	3.90146	9.56132e-05	0.000283924
FBgn0034184	CG9646	uncharacterized protein	958.559	0.258568	0.0721672	3.5829	0.000339803	0.000909763
FBgn0034198	CG11400	uncharacterized protein	288.04	0.685811	0.1989	3.44802	0.000564708	0.00144987
FBgn0034200	Gbp2	Growth-blocking peptide 2	358.013	0.824422	0.18596	4.43332	9.2793e-06	3.26847e-05
FBgn0034219	mthl4	methuselah-like 4	405.765	1.2476	0.237962	5.24287	1.58094e-07	7.3351e-07
FBgn0034221	CG10764	uncharacterized protein	50.6462	2.33245	0.54744	4.26065	2.03829e-05	6.80418e-05
FBgn0034229	CG4847	uncharacterized protein	199.043	4.19696	0.411127	10.2084	1.81816e-24	5.88078e-23
FBgn0034247	CG6484	uncharacterized protein	354.304	3.13198	1.19419	2.62267	0.00872433	0.017443
FBgn0034262	swi2	swi2	192.762	1.52605	0.450478	3.38762	0.000705009	0.00177585
FBgn0034267	CG4984	uncharacterized protein	265.264	1.28569	0.212526	6.04956	1.45245e-09	8.9606e-09
FBgn0034275	CG5002	uncharacterized protein	426.46	2.42076	0.232772	10.3997	2.48702e-25	8.53441e-24
FBgn0034276	Sardh	Sarcosine dehydrogenase	28.8104	2.27596	0.368053	6.1838	6.25772e-10	4.0736e-09
FBgn0034279	CG18635	uncharacterized protein	50.0974	3.08405	0.523631	5.88974	3.86801e-09	2.24856e-08
FBgn0034286	dpr13	defective proboscis extension response 13	18.488	3.91276	0.43122	9.0737	1.15045e-19	2.39525e-18
FBgn0034289	CG10910	uncharacterized protein	312.373	6.6642	1.70142	3.91685	8.97145e-05	0.000267607
FBgn0034290	CG5773	uncharacterized protein	241.375	3.98558	0.360376	11.0595	1.97171e-28	8.60054e-27
FBgn0034293	CG14495	uncharacterized protein	10.8849	3.86681	1.63159	2.36997	0.0177898	0.0331997
FBgn0034294	Muc55B	Mucin 55B	14.0458	4.25479	1.55666	2.73328	0.00627069	0.0129318
FBgn0034312	CG10916	uncharacterized protein	239.616	1.59965	0.163392	9.79023	1.24019e-22	3.35447e-21
FBgn0034315	CG5721	uncharacterized protein	1157.95	0.590846	0.0853601	6.92181	4.45922e-12	3.90395e-11
FBgn0034331	CG15067	uncharacterized protein	562.128	1.0491	0.362302	2.89564	0.00378384	0.00818907
FBgn0034364	CG5493	uncharacterized protein	31.8184	1.09289	0.479294	2.2802	0.0225959	0.0411704
FBgn0034372	Gint3	GDI interacting protein 3	678.569	0.379223	0.0900279	4.21228	2.52805e-05	8.33134e-05
FBgn0034381	List	Lithium-inducible SLC6 transporter	131.839	3.16629	0.499353	6.3408	2.28577e-10	1.58102e-09
FBgn0034382	CG18609	uncharacterized protein	58.2992	1.7767	0.371088	4.78782	1.68599e-06	6.74397e-06
FBgn0034387	Cyp12b2	Cyp12b2	115.831	0.69561	0.244377	2.84647	0.0044207	0.00943712
FBgn0034392	MFS15	Major Facilitator Superfamily Transporter 15	486.112	0.378336	0.129661	2.91789	0.00352412	0.00768471
FBgn0034394	CG15096	uncharacterized protein	1689.41	2.93477	0.168276	17.4402	4.0838e-68	1.39342e-65
FBgn0034396	CG15097	uncharacterized protein	75.4537	2.25633	0.267881	8.42288	3.67346e-17	6.2083e-16
FBgn0034397	CG15082	uncharacterized protein	13.9331	1.75911	0.438315	4.01335	5.98625e-05	0.000184151
FBgn0034398	CG15098	uncharacterized protein	6949.03	1.09059	0.108449	10.0563	8.6204e-24	2.65646e-22
FBgn0034399	CG15083	uncharacterized protein	1537.62	0.427128	0.183338	2.32973	0.0198203	0.0366414
FBgn0034406	Jheh3	Juvenile hormone epoxide hydrolase 3	763.538	1.03395	0.276901	3.73403	0.000188442	0.000529587
FBgn0034408	sano	serrano	837.767	2.27814	0.301463	7.55693	4.12696e-14	4.72067e-13
FBgn0034417	CG15117	uncharacterized protein	222.629	2.05085	0.244756	8.37918	5.32996e-17	8.93105e-16
FBgn0034418	CG15118	uncharacterized protein	1800.07	0.230161	0.0836759	2.75063	0.00594814	0.0123323
FBgn0034419	CG15111	uncharacterized protein	928.342	0.259151	0.0786971	3.29302	0.000991183	0.00241851
FBgn0034420	CG10737	uncharacterized protein	3701.56	2.05195	0.137709	14.9006	3.26834e-50	6.04302e-48
FBgn0034432	CG7461	uncharacterized protein	3017.88	0.310304	0.124346	2.49548	0.0125786	0.024283
FBgn0034435	fest	wurstfest	15.0892	2.83227	1.04649	2.70645	0.0068006	0.0139065
FBgn0034436	CG11961	uncharacterized protein	1086.92	1.0156	0.232488	4.36838	1.25169e-05	4.31922e-05
FBgn0034437	CG10051	uncharacterized protein	15.9548	5.04647	1.35733	3.71793	0.000200861	0.000562194
FBgn0034438	CG9416	uncharacterized protein	1173.5	0.823935	0.0930866	8.85127	8.65262e-19	1.70411e-17
FBgn0034443	cer	crammer	872.033	1.52405	0.209424	7.27735	3.40451e-13	3.44568e-12
FBgn0034454	CG15120	uncharacterized protein	15.408	1.81467	0.488335	3.71604	0.000202372	0.000565655
FBgn0034455	CG11007	uncharacterized protein	905.582	0.802872	0.135567	5.92233	3.17411e-09	1.87064e-08
FBgn0034460	CG18367	uncharacterized protein	117.541	3.63719	0.399753	9.0986	9.15048e-20	1.93111e-18
FBgn0034468	Obp56a	Odorant-binding protein 56a	41.8967	3.03804	0.48688	6.23981	4.38111e-10	2.90697e-09
FBgn0034479	CG8654	uncharacterized protein	132.225	2.50054	0.30402	8.22491	1.95333e-16	3.00221e-15
FBgn0034480	CG16898	uncharacterized protein	108.22	1.67763	0.506037	3.31523	0.000915672	0.00224933
FBgn0034484	CG11044	uncharacterized protein	26.1586	1.83071	0.662945	2.76148	0.00575396	0.0119778
FBgn0034490	CG9864	uncharacterized protein	908.483	3.65581	0.327195	11.1732	5.51592e-29	2.50297e-27
FBgn0034491	Hsl	Hormone-sensitive lipase	1249.4	0.427735	0.0804958	5.31376	1.07386e-07	5.10865e-07
FBgn0034497	Mpcp1	Mitochondrial phosphate carrier protein 1	621.263	2.63516	0.238822	11.034	2.61953e-28	1.13464e-26
FBgn0034507	CG11192	uncharacterized protein	6.17876	2.66852	0.742175	3.59554	0.000323725	0.000870669
FBgn0034509	Obp57c	Odorant-binding protein 57c	31.0996	1.78689	0.797863	2.23959	0.0251173	0.0453159
FBgn0034512	CG18067	uncharacterized protein	725.689	1.91204	0.446266	4.28454	1.83115e-05	6.16084e-05
FBgn0034517	Cpr57A	Cuticular protein 57A	81.6559	2.95345	0.341188	8.65637	4.87047e-18	8.91217e-17
FBgn0034530	Rcd6	Reduction in Cnn dots 6	105.461	2.06977	0.366011	5.65495	1.55892e-08	8.35289e-08
FBgn0034538	CG16799	uncharacterized protein	95.8753	2.37232	0.320056	7.41219	1.24229e-13	1.32554e-12
FBgn0034540	Lrt	Leucine-rich tendon-specific protein	18.9746	1.03963	0.341599	3.04341	0.00233916	0.00527726
FBgn0034558	Cib2	Calcium and integrin binding family member 2	15.0058	1.11046	0.422028	2.63125	0.00850723	0.0170696
FBgn0034573	CG3295	uncharacterized protein	847.485	0.528042	0.0862222	6.1242	9.11383e-10	5.77505e-09
FBgn0034577	cpa	capping protein alpha	2478.23	0.327168	0.0684607	4.77891	1.76245e-06	7.03163e-06
FBgn0034582	Cht9	Chitinase 9	8.35503	5.98324	1.5832	3.7792	0.00015733	0.000449599
FBgn0034583	CG10527	uncharacterized protein	4865.04	2.36774	0.239251	9.89647	4.31232e-23	1.2366e-21
FBgn0034588	CG9394	uncharacterized protein	318.91	1.88143	0.564235	3.33448	0.000854578	0.00211845
FBgn0034590	Magi	magi	1179.25	0.439964	0.141524	3.10876	0.00187877	0.00433169
FBgn0034601	CG4286	uncharacterized protein	3.94505	3.15093	1.12719	2.79539	0.00518379	0.0109045
FBgn0034602	Lapsyn	Leucine-rich repeat activity-regulated protein at synapses	302.643	1.29133	0.211257	6.1126	9.80185e-10	6.18255e-09
FBgn0034605	Ugt49C1	UDP-glycosyltransferase family 49 member C1	101.794	2.96897	0.313874	9.45914	3.10483e-21	7.52694e-20
FBgn0034636	twz	tiwaz	33.4372	3.36261	0.489989	6.86261	6.7613e-12	5.77648e-11
FBgn0034638	CG10433	uncharacterized protein	957.439	2.87213	0.17216	16.6829	1.74497e-62	4.69928e-60
FBgn0034639	CG15673	uncharacterized protein	189.201	3.1719	0.248805	12.7485	3.17691e-37	2.57226e-35
FBgn0034644	CG10082	uncharacterized protein	1742.25	0.73317	0.206121	3.55699	0.000375123	0.000996573
FBgn0034647	pirk	poor Imd response upon knock-in	60.8741	1.81503	0.349603	5.1917	2.08388e-07	9.49434e-07
FBgn0034655	CG10307	uncharacterized protein	90.6633	1.00138	0.227811	4.39565	1.1044e-05	3.83982e-05
FBgn0034660	Loxl2	Lysyl oxidase-like 2	57.8664	1.64803	0.498992	3.30271	0.00095755	0.00234198
FBgn0034661	CG4386	uncharacterized protein	1.50284	3.56298	1.25467	2.83979	0.00451437	0.00962382
FBgn0034666	CG9294	uncharacterized protein	1.44139	3.59075	1.34822	2.66332	0.00773737	0.0156554
FBgn0034687	CG11475	uncharacterized protein	23.3994	1.92143	0.351261	5.4701	4.4978e-08	2.27145e-07
FBgn0034688	CG11474	uncharacterized protein	734.86	0.49726	0.0765726	6.49397	8.36061e-11	6.12485e-10
FBgn0034692	CG13502	uncharacterized protein	4.90922	2.75605	0.782323	3.5229	0.000426849	0.00112054
FBgn0034693	CG11073	uncharacterized protein	49.5179	2.5965	0.573199	4.52985	5.90255e-06	2.15378e-05
FBgn0034697	GM130	Golgi matrix protein 130 kD	889.906	1.12024	0.306948	3.64961	0.000262635	0.000720922
FBgn0034710	Alp7	Alkaline phosphatase 7	2.91539	3.67849	1.32016	2.7864	0.00532964	0.0111795
FBgn0034712	Alp8	Alkaline phosphatase 8	63.5269	5.31427	1.0867	4.89028	1.00691e-06	4.16758e-06
FBgn0034715	Oatp58Db	Organic anion transporting polypeptide 58Db	237.493	4.58146	0.417743	10.9672	5.49616e-28	2.31586e-26
FBgn0034716	Oatp58Dc	Organic anion transporting polypeptide 58Dc	1233.92	2.90726	0.454233	6.40038	1.54995e-10	1.09157e-09
FBgn0034717	CG5819	uncharacterized protein	169.144	2.71883	0.604921	4.49453	6.97237e-06	2.51013e-05
FBgn0034718	wdp	windpipe	2012.59	2.07929	0.2124	9.7895	1.24911e-22	3.37124e-21
FBgn0034720	Liprin-gamma	Liprin-gamma	312.885	2.73255	0.362076	7.5469	4.45744e-14	5.07525e-13
FBgn0034723	CG13506	uncharacterized protein	4907.42	2.22057	0.211893	10.4797	1.0711e-25	3.76954e-24
FBgn0034724	babos	babos	4648.99	1.23861	0.158981	7.79092	6.65225e-15	8.46948e-14
FBgn0034733	CG4752	uncharacterized protein	1067.57	1.33883	0.268046	4.99476	5.89082e-07	2.5164e-06
FBgn0034736	gas	gasoline	145.433	2.72717	0.229589	11.8785	1.53097e-32	8.73994e-31
FBgn0034741	CG4269	uncharacterized protein	113.329	2.20046	0.312225	7.04767	1.81935e-12	1.69079e-11
FBgn0034744	Vps20	Vacuolar protein sorting 20	793.151	0.407803	0.0990504	4.11713	3.83616e-05	0.000122103
FBgn0034745	CG4329	uncharacterized protein	5.26849	2.22798	0.737775	3.01987	0.00252886	0.00566296
FBgn0034755	CG3746	uncharacterized protein	335.859	2.04304	0.244944	8.34087	7.3748e-17	1.21344e-15
FBgn0034758	CG13510	uncharacterized protein	291.513	2.34408	0.433814	5.40342	6.5383e-08	3.2167e-07
FBgn0034759	CG13511	uncharacterized protein	27.3763	2.05595	0.467581	4.39699	1.09764e-05	3.81847e-05
FBgn0034761	CG4250	uncharacterized protein	4332.21	0.821087	0.184934	4.43988	9.00078e-06	3.1785e-05
FBgn0034784	CG9826	uncharacterized protein	18.8599	3.10385	0.675621	4.59407	4.34685e-06	1.62146e-05
FBgn0034785	CG3649	uncharacterized protein	5.37618	1.81217	0.712749	2.54251	0.011006	0.0214858
FBgn0034797	nahoda	nahoda	1379.23	2.38159	0.287257	8.2908	1.12485e-16	1.78421e-15
FBgn0034822	RpL37b	Ribosomal protein L37b	16.1441	2.94502	0.500593	5.88306	4.02739e-09	2.33048e-08
FBgn0034828	CG13545	uncharacterized protein	13.076	3.22451	0.789649	4.08347	4.43689e-05	0.000139894
FBgn0034829	CG9899	uncharacterized protein	7.98319	4.15565	1.00019	4.15486	3.2548e-05	0.00010481
FBgn0034835	CG3092	uncharacterized protein	2.10657	4.15075	1.80275	2.30245	0.0213095	0.039068
FBgn0034837	RpL22-like	Ribosomal protein L22-like	77.8645	3.95568	0.42878	9.22541	2.82472e-20	6.25986e-19
FBgn0034838	CG12782	uncharacterized protein	30.4958	0.861972	0.379958	2.2686	0.0232927	0.0423032
FBgn0034839	CG13540	uncharacterized protein	53.5875	1.61853	0.349298	4.63366	3.59249e-06	1.35889e-05
FBgn0034844	CG9861	uncharacterized protein	5.37315	2.46431	0.78608	3.13493	0.00171896	0.0039952
FBgn0034860	CG9812	uncharacterized protein	231.712	1.75513	0.398109	4.40866	1.04013e-05	3.62561e-05
FBgn0034861	CG9815	uncharacterized protein	207.512	1.51692	0.179353	8.45771	2.72677e-17	4.64001e-16
FBgn0034870	CG13559	uncharacterized protein	5.63027	2.41034	0.57535	4.18935	2.7975e-05	9.13186e-05
FBgn0034876	wmd	wing morphogenesis defect	2707.18	0.4637	0.0997108	4.65045	3.31214e-06	1.26171e-05
FBgn0034880	NA	NA	11.873	1.4135	0.540446	2.61542	0.00891169	0.0177803
FBgn0034882	Eglp1	Entomoglyceroporin 1	2.27601	4.28718	1.73488	2.47116	0.0134674	0.0258538
FBgn0034883	Eglp2	Entomoglyceroporin 2	229.167	2.66442	0.444681	5.99175	2.07592e-09	1.25081e-08
FBgn0034885	Eglp4	Entomoglyceroporin 4	488.956	2.81483	0.374651	7.5132	5.76989e-14	6.44521e-13
FBgn0034887	St1	Sulfotransferase 1	237.174	1.93896	0.194478	9.97006	2.06095e-23	6.06437e-22
FBgn0034897	Sesn	Sestrin	2309.39	1.22066	0.159448	7.65554	1.92496e-14	2.31969e-13
FBgn0034898	CG18128	uncharacterized protein	2.27924	2.43396	0.948507	2.56609	0.0102852	0.0202306
FBgn0034903	sona	sol narae	249.142	1.16139	0.260531	4.45778	8.28129e-06	2.94541e-05
FBgn0034920	CG5597	uncharacterized protein	1194.54	2.59005	0.192967	13.4223	4.47667e-41	4.99612e-39
FBgn0034943	Fmo-1	Flavin-containing monooxygenase 1	116.554	1.87637	0.256464	7.31633	2.54842e-13	2.63741e-12
FBgn0034946	CG3065	uncharacterized protein	743.698	0.546677	0.131487	4.15765	3.21543e-05	0.000103731
FBgn0034948	PPP1R15	Protein phosphatase 1 regulatory subunit 15	1170.31	0.29278	0.120959	2.42048	0.0154999	0.0293552
FBgn0034956	CG4324	uncharacterized protein	33.9108	2.87825	0.597824	4.81454	1.47539e-06	5.96124e-06
FBgn0034957	CG3121	uncharacterized protein	53.6048	3.74776	0.356832	10.5029	8.3787e-26	3.01731e-24
FBgn0034958	CG3907	uncharacterized protein	729.845	1.48388	0.155945	9.51547	1.80901e-21	4.51816e-20
FBgn0034970	yki	yorkie	1053.1	0.604323	0.15826	3.81855	0.000134237	0.000388082
FBgn0034971	Gpat4	Glycerol-3-phosphate acyltransferase 4	1990.41	0.247066	0.0789757	3.12837	0.00175776	0.0040808
FBgn0034972	CG10339	uncharacterized protein	3.53853	1.74526	0.79347	2.19953	0.0278406	0.0496887
FBgn0034978	CG3257	uncharacterized protein	9.20404	2.01987	0.634512	3.18334	0.00145586	0.0034294
FBgn0034985	CG3328	uncharacterized protein	305.454	2.97352	0.555537	5.35251	8.67438e-08	4.17963e-07
FBgn0034990	CG11406	uncharacterized protein	17.2841	2.49701	0.648711	3.84918	0.000118512	0.000345523
FBgn0034994	Ir60a	Ionotropic receptor 60a	17.8761	1.03285	0.441755	2.33807	0.0193838	0.0359094
FBgn0034996	CG13575	uncharacterized protein	10.8065	1.61993	0.548205	2.95498	0.00312692	0.00689748
FBgn0034997	CG3376	uncharacterized protein	1120.66	1.02413	0.165714	6.18009	6.40645e-10	4.16168e-09
FBgn0035006	CG4563	uncharacterized protein	5.1479	3.598	1.29833	2.77125	0.00558415	0.0116517
FBgn0035007	CG3492	uncharacterized protein	2.32038	4.36864	1.73723	2.51472	0.0119127	0.0231343
FBgn0035020	CG13585	uncharacterized protein	825.554	0.97435	0.16708	5.83163	5.48888e-09	3.10627e-08
FBgn0035023	ITP	Ion transport peptide	300.513	1.22844	0.222711	5.51585	3.47103e-08	1.78124e-07
FBgn0035041	CG13594	uncharacterized protein	16.6835	1.10408	0.480786	2.29641	0.0216523	0.0396495
FBgn0035043	CG4781	uncharacterized protein	122.204	3.09135	0.752635	4.10737	4.00189e-05	0.000127051
FBgn0035049	Mmp1	Matrix metalloproteinase 1	1816.45	1.63029	0.245737	6.63428	3.26085e-11	2.51999e-10
FBgn0035050	SiaT	Sialyltransferase	7.27895	2.28684	0.56062	4.07912	4.52056e-05	0.00014217
FBgn0035076	Ance-5	Ance-5	488.462	2.68895	0.377963	7.11434	1.12448e-12	1.07485e-11
FBgn0035085	CG3770	uncharacterized protein	882.898	1.07246	0.11635	9.21758	3.03889e-20	6.71047e-19
FBgn0035087	CG2765	uncharacterized protein	1559.72	0.394883	0.118623	3.3289	0.000871901	0.00215548
FBgn0035089	Phk-3	Pherokine 3	311.143	2.49452	0.273171	9.13172	6.74193e-20	1.44747e-18
FBgn0035090	CG2736	uncharacterized protein	332.321	2.78425	0.278077	10.0125	1.34315e-23	4.07818e-22
FBgn0035091	CG3829	uncharacterized protein	360.246	1.52739	0.201491	7.5804	3.44496e-14	3.98842e-13
FBgn0035092	Nplp1	Neuropeptide-like precursor 1	14.4904	3.00893	0.839989	3.58211	0.000340833	0.000912169
FBgn0035094	CG9380	uncharacterized protein	563.259	1.99175	0.420732	4.73401	2.20123e-06	8.65189e-06
FBgn0035102	CG7049	uncharacterized protein	413.709	0.382937	0.0980588	3.90518	9.41555e-05	0.00027998
FBgn0035103	Vdup1	Vitamin D[[3]] up-regulated protein 1	279.958	2.5668	0.173646	14.7818	1.92082e-49	3.39931e-47
FBgn0035112	CG13877	uncharacterized protein	12.7003	2.50687	0.555727	4.51097	6.45306e-06	2.33792e-05
FBgn0035113	pyx	pyrexia	686.955	2.84727	0.220264	12.9266	3.18481e-38	2.8181e-36
FBgn0035124	ttm2	tiny tim 2	4.7768	1.91367	0.665436	2.87582	0.00402985	0.0086745
FBgn0035131	mthl9	methuselah-like 9	217.185	1.77214	0.223945	7.91329	2.50673e-15	3.40871e-14
FBgn0035132	mthl10	methuselah-like 10	1277.35	0.623319	0.161737	3.8539	0.000116249	0.000339246
FBgn0035144	Kah	Kahuli	34.4382	1.98926	0.434185	4.5816	4.61428e-06	1.71502e-05
FBgn0035146	CG13893	uncharacterized protein	382.747	1.61641	0.315001	5.13145	2.87526e-07	1.28866e-06
FBgn0035147	Gale	UDP-galactose 4'-epimerase	1564.47	1.37696	0.153182	8.98906	2.49363e-19	5.10597e-18
FBgn0035157	CG13894	uncharacterized protein	32.2154	0.823829	0.355819	2.3153	0.0205964	0.0379064
FBgn0035165	CG13887	uncharacterized protein	2495.42	0.965129	0.117726	8.19808	2.4425e-16	3.70804e-15
FBgn0035168	cep290	cep290	19.9863	3.29345	0.500608	6.5789	4.73942e-11	3.59534e-10
FBgn0035173	CG13907	uncharacterized protein	3639.8	0.65271	0.188694	3.4591	0.000541983	0.00139484
FBgn0035176	CG13905	uncharacterized protein	213.28	2.80076	0.573029	4.88764	1.0205e-06	4.2154e-06
FBgn0035181	CG9205	uncharacterized protein	1364.02	0.345474	0.116702	2.9603	0.00307336	0.006789
FBgn0035187	Trh	Tryptophan hydroxylase	5.25899	1.64517	0.645078	2.55034	0.0107619	0.0210613
FBgn0035189	CG9119	uncharacterized protein	2461.38	2.6151	0.421156	6.20934	5.32062e-10	3.49295e-09
FBgn0035192	CG9194	uncharacterized protein	609.911	2.96865	0.32688	9.08176	1.06833e-19	2.23555e-18
FBgn0035193	CG9192	uncharacterized protein	6.41692	1.97984	0.865782	2.28677	0.0222092	0.0405195
FBgn0035196	CG9129	uncharacterized protein	12.792	1.39677	0.429412	3.25274	0.00114296	0.00275467
FBgn0035199	tfc	triforce	12.9718	3.51184	0.738266	4.75687	1.96615e-06	7.78417e-06
FBgn0035203	CG9149	uncharacterized protein	1766.18	0.275451	0.0990121	2.782	0.00540254	0.0113109
FBgn0035208	CG9184	uncharacterized protein	12.6421	1.31543	0.499335	2.63436	0.00842959	0.016933
FBgn0035228	CG12091	uncharacterized protein	2821.38	0.325226	0.102768	3.16465	0.00155268	0.00363947
FBgn0035231	Pcyt2	Phosphocholine cytidylyltransferase 2	45.9132	1.10567	0.305997	3.61334	0.000302284	0.000818332
FBgn0035237	CG13917	uncharacterized protein	3109.72	1.16804	0.404085	2.89059	0.00384523	0.00831177
FBgn0035240	CG33791	uncharacterized protein	12.8489	1.56471	0.483377	3.23704	0.00120775	0.00289113
FBgn0035241	CG12105	uncharacterized protein	341.102	1.54148	0.19735	7.81091	5.67751e-15	7.30353e-14
FBgn0035251	Vta1	Vesicle trafficking 1	1316.93	0.868979	0.106967	8.12382	4.51742e-16	6.68599e-15
FBgn0035252	CG7970	uncharacterized protein	1448.87	0.419049	0.12451	3.36559	0.000763798	0.00191305
FBgn0035260	CG7991	uncharacterized protein	9.63745	1.90447	0.567243	3.35741	0.000786766	0.00196462
FBgn0035273	CG12020	uncharacterized protein	1.8735	3.4962	1.58192	2.2101	0.0270979	0.048503
FBgn0035279	Cpr62Ba	Cuticular protein 62Ba	7.12343	2.75211	0.804997	3.41879	0.000629003	0.00160199
FBgn0035280	Cpr62Bb	Cuticular protein 62Bb	28.838	2.42609	0.656824	3.69367	0.000221038	0.000613738
FBgn0035283	CG12024	uncharacterized protein	689.439	0.501343	0.0934957	5.3622	8.2214e-08	3.97994e-07
FBgn0035285	CG12025	uncharacterized protein	1627.63	0.369148	0.120195	3.07125	0.00213166	0.00485513
FBgn0035287	CG13937	uncharacterized protein	390.003	2.18802	0.314127	6.96541	3.27458e-12	2.91629e-11
FBgn0035293	CG5687	uncharacterized protein	88.898	2.90344	0.499866	5.80843	6.30612e-09	3.54931e-08
FBgn0035298	SCOT	Succinyl-CoA:3-ketoacid CoA transferase	1623.82	0.452105	0.118838	3.80438	0.000142159	0.000408973
FBgn0035300	CG1139	uncharacterized protein	135.526	1.84965	0.638604	2.89639	0.00377479	0.00817377
FBgn0035309	CG15879	uncharacterized protein	54.0897	0.561541	0.244799	2.29388	0.0217973	0.0398796
FBgn0035321	CG1275	uncharacterized protein	3142.63	1.58946	0.127962	12.4213	2.00208e-35	1.43363e-33
FBgn0035333	CG1317	uncharacterized protein	2067.01	0.647999	0.167371	3.87162	0.000108114	0.000317749
FBgn0035343	CG16762	uncharacterized protein	95.0125	1.66806	0.512192	3.2567	0.00112717	0.00271925
FBgn0035344	Cyp4d20	Cyp4d20	42.178	3.163	0.525896	6.01451	1.80437e-09	1.09464e-08
FBgn0035346	CG1146	uncharacterized protein	507.905	1.6367	0.125889	13.0012	1.20431e-38	1.14762e-36
FBgn0035356	CG16986	uncharacterized protein	403.929	0.746148	0.29192	2.556	0.0105882	0.0207608
FBgn0035358	CG14949	uncharacterized protein	43.2509	0.984318	0.360567	2.72991	0.00633508	0.0130472
FBgn0035360	CG1246	uncharacterized protein	116.22	2.56069	0.666675	3.84099	0.000122538	0.000356506
FBgn0035371	AhcyL1	Adenosylhomocysteinase like 1	4069.13	1.24031	0.0850754	14.579	3.82078e-48	5.91648e-46
FBgn0035375	Pgant6	Polypeptide N-Acetylgalactosaminyltransferase 6	1553.77	0.240268	0.0854583	2.81152	0.00493074	0.0104235
FBgn0035379	spz5	spatzle 5	20.5575	3.11362	0.420723	7.40065	1.35522e-13	1.44231e-12
FBgn0035380	CG9970	uncharacterized protein	1.94451	3.28406	1.39972	2.34622	0.0189648	0.0351858
FBgn0035385	FMRFaR	FMRFamide Receptor	5.46688	1.97034	0.856494	2.30047	0.0214214	0.0392614
FBgn0035390	scramb2	scramblase 2	1804.27	0.857666	0.102513	8.36641	5.93996e-17	9.87707e-16
FBgn0035398	Cht7	Chitinase 7	75.1762	1.60571	0.561885	2.85772	0.004267	0.00913736
FBgn0035400	CG11537	uncharacterized protein	2188.82	0.76715	0.100693	7.61867	2.5631e-14	3.05599e-13
FBgn0035409	CG14963	uncharacterized protein	56.2541	1.53161	0.383036	3.99862	6.37126e-05	0.000195075
FBgn0035410	CG14964	uncharacterized protein	683.546	2.45087	0.296361	8.26987	1.34107e-16	2.10027e-15
FBgn0035413	CG14958	uncharacterized protein	4.16012	2.4722	0.843043	2.93247	0.00336277	0.00736658
FBgn0035427	ckd	cracked	206.389	5.75216	0.616648	9.32811	1.07772e-20	2.49081e-19
FBgn0035428	CG14960	uncharacterized protein	1.43763	4.73771	1.63619	2.89558	0.00378458	0.00818924
FBgn0035430	CG12009	uncharacterized protein	25.3881	6.8635	0.841681	8.15451	3.50593e-16	5.22641e-15
FBgn0035431	CG14968	uncharacterized protein	157.414	2.83773	0.275813	10.2886	7.93154e-25	2.60425e-23
FBgn0035432	ZnT63C	Zinc transporter 63C	2491.4	0.789808	0.0947645	8.33443	7.78733e-17	1.27304e-15
FBgn0035434	Drsl5	Drosomycin-like 5	76.35	4.31237	0.695445	6.20089	5.61458e-10	3.6723e-09
FBgn0035437	Strip	Striatin interacting protein	1368.36	0.493988	0.0931224	5.30472	1.12845e-07	5.35605e-07
FBgn0035438	PHGPx	PHGPx	2416.79	1.00692	0.142431	7.06953	1.55458e-12	1.45454e-11
FBgn0035439	CG14961	uncharacterized protein	121.81	1.77409	0.483917	3.66611	0.000246271	0.000679012
FBgn0035444	CG12012	uncharacterized protein	502.393	0.389896	0.174052	2.24011	0.0250841	0.0452646
FBgn0035452	CG10359	uncharacterized protein	155.828	2.33205	0.308716	7.55403	4.21995e-14	4.81813e-13
FBgn0035471	Sc2	Sc2	2099.14	0.513636	0.128368	4.00129	6.29979e-05	0.000193173
FBgn0035480	CG14984	uncharacterized protein	64.8179	2.08776	0.345418	6.04417	1.50178e-09	9.24195e-09
FBgn0035481	CG12605	uncharacterized protein	11.8745	2.32477	0.456223	5.0957	3.47454e-07	1.53888e-06
FBgn0035484	CG11594	uncharacterized protein	692.218	1.93039	0.319507	6.04177	1.5243e-09	9.37123e-09
FBgn0035490	CG1136	uncharacterized protein	1647.89	1.51128	0.23654	6.38912	1.6684e-10	1.17098e-09
FBgn0035491	Dpy-30L2	Dpy-30-like 2	11.1143	1.79867	0.800527	2.24685	0.0246495	0.0445204
FBgn0035496	CG14990	uncharacterized protein	31.366	1.65366	0.355036	4.65773	3.19722e-06	1.22357e-05
FBgn0035497	CG14995	uncharacterized protein	536.314	0.745316	0.170814	4.36333	1.28099e-05	4.41538e-05
FBgn0035498	Fit1	Fermitin 1	3585.66	1.50646	0.110864	13.5884	4.69237e-42	5.48388e-40
FBgn0035499	Chd64	Chd64	7654.68	1.33605	0.123469	10.8209	2.73929e-27	1.08416e-25
FBgn0035501	CG1299	uncharacterized protein	140.4	2.08528	0.277483	7.51498	5.69215e-14	6.36986e-13
FBgn0035504	Teh4	tipE homolog 4	6.31966	2.2977	0.668594	3.43662	0.00058903	0.00150669
FBgn0035512	Cpr64Ac	Cuticular protein 64Ac	8.60946	2.06221	0.572185	3.6041	0.000313242	0.000845227
FBgn0035513	Cpr64Ad	Cuticular protein 64Ad	15.8124	1.86414	0.408362	4.56492	4.99675e-06	1.8472e-05
FBgn0035519	CG1309	uncharacterized protein	1038.87	0.208529	0.0949263	2.19675	0.0280385	0.0499699
FBgn0035523	Ctl1	Choline transporter-like 1	1446.15	0.434941	0.135095	3.21952	0.00128405	0.00306017
FBgn0035533	Cip4	Cdc42-interacting protein 4	2854.85	1.08007	0.124096	8.70354	3.21696e-18	6.01945e-17
FBgn0035538	DopEcR	Dopamine/Ecdysteroid receptor	13.6064	1.76347	0.601384	2.93235	0.00336409	0.00736817
FBgn0035540	Syx17	Syntaxin 17	394.172	0.279981	0.124668	2.24582	0.0247157	0.0446194
FBgn0035542	DOR	Diabetes and obesity regulated	1694.2	2.03569	0.312568	6.51279	7.37674e-11	5.44271e-10
FBgn0035557	CG11353	uncharacterized protein	137.334	0.571197	0.161528	3.53621	0.000405915	0.00107103
FBgn0035571	CG12493	uncharacterized protein	185.124	2.96383	0.383129	7.73586	1.02704e-14	1.27613e-13
FBgn0035572	CG13711	uncharacterized protein	2.93994	5.65865	1.63991	3.45059	0.000559366	0.00143704
FBgn0035578	CG13707	uncharacterized protein	29.4723	2.044	0.43928	4.65307	3.27034e-06	1.24771e-05
FBgn0035582	CG13705	uncharacterized protein	1.68843	3.86494	1.41457	2.73225	0.00629042	0.0129639
FBgn0035583	CG13704	uncharacterized protein	133.709	2.65796	0.676927	3.92651	8.61867e-05	0.000258018
FBgn0035586	Fitm	Fat storage inducing transmembrane protein	866.949	0.613027	0.120485	5.088	3.61859e-07	1.59719e-06
FBgn0035587	Gdap1	Gdap1	119.709	2.3314	0.344564	6.76621	1.32197e-11	1.08382e-10
FBgn0035589	CHMP2B	Charged multivesicular body protein 2b	338.059	0.592867	0.213984	2.77061	0.00559505	0.0116687
FBgn0035593	CG4603	uncharacterized protein	700.388	0.412477	0.151028	2.73113	0.00631173	0.0130034
FBgn0035608	blanks	blanks	48.3149	1.8367	0.374358	4.90627	9.28238e-07	3.86651e-06
FBgn0035610	Lkr	Leucokinin receptor	39.1923	2.94737	0.445917	6.60969	3.85125e-11	2.95231e-10
FBgn0035611	CG13285	uncharacterized protein	22.0587	1.55319	0.465455	3.33694	0.000847071	0.00210249
FBgn0035612	frm	farmer	462.079	4.57966	0.414007	11.0618	1.92228e-28	8.41454e-27
FBgn0035619	Alp10	Alkaline phosphatase 10	23.1088	2.79778	0.952899	2.93607	0.00332398	0.00729579
FBgn0035620	Alp9	Alkaline phosphatase 9	21.9423	3.09115	1.1979	2.58047	0.00986668	0.019516
FBgn0035622	TM9SF3	Transmembrane 9 superfamily protein member 3	1386.94	0.232062	0.0887788	2.61393	0.00895063	0.0178465
FBgn0035623	mthl2	methuselah-like 2	178.292	2.17992	0.370449	5.88454	3.99154e-09	2.31278e-08
FBgn0035625	Blimp-1	Blimp-1	802.998	2.24965	0.418144	5.38007	7.4458e-08	3.63001e-07
FBgn0035626	lin-28	lin-28	5.8029	2.1182	0.728853	2.90621	0.00365835	0.00793968
FBgn0035636	Cralbp	Cellular retinaldehyde binding protein	12.1387	3.41946	0.902477	3.78897	0.000151271	0.000433483
FBgn0035649	CG10483	uncharacterized protein	84.0384	1.28548	0.342546	3.75272	0.000174924	0.000495192
FBgn0035656	CG10479	uncharacterized protein	430.455	1.89324	0.239492	7.90521	2.67476e-15	3.62131e-14
FBgn0035669	CG6592	uncharacterized protein	1.41971	3.17294	1.37363	2.30989	0.0208941	0.0384086
FBgn0035673	CG6602	uncharacterized protein	925.408	3.22574	0.401272	8.03879	9.07276e-16	1.29188e-14
FBgn0035678	CG10469	uncharacterized protein	124.286	1.00726	0.298001	3.38005	0.000724716	0.00182216
FBgn0035679	CG10467	uncharacterized protein	822.936	1.6136	0.263336	6.12753	8.92563e-10	5.66448e-09
FBgn0035693	CG8219	uncharacterized protein	20.8863	0.893119	0.349257	2.55719	0.010552	0.0207062
FBgn0035694	CG13299	uncharacterized protein	470.585	5.08133	1.51254	3.35946	0.000780946	0.00195126
FBgn0035695	CG10226	uncharacterized protein	470.529	4.22123	0.369074	11.4374	2.71975e-30	1.3696e-28
FBgn0035696	Best2	Bestrophin 2	2809.96	3.48449	0.146229	23.829	1.67249e-125	6.90627e-122
FBgn0035708	axed	axundead	345.884	1.94627	0.289943	6.71258	1.91212e-11	1.53217e-10
FBgn0035710	SP1173	SP1173	3144.01	1.51084	0.276595	5.46228	4.70056e-08	2.36806e-07
FBgn0035711	CG8519	uncharacterized protein	78.5039	2.25277	0.267612	8.41806	3.82784e-17	6.46039e-16
FBgn0035715	CG10103	uncharacterized protein	1118.99	0.531373	0.0700848	7.58185	3.40652e-14	3.95872e-13
FBgn0035719	tow	target of wingless	82.8629	2.70308	0.434458	6.22172	4.91735e-10	3.2385e-09
FBgn0035724	CG10064	uncharacterized protein	15.4501	1.11512	0.412072	2.70613	0.00680726	0.0139179
FBgn0035734	CG14823	uncharacterized protein	35.4622	1.92405	0.375237	5.12757	2.93505e-07	1.31261e-06
FBgn0035743	Acbp6	Acyl-CoA binding protein 6	8.36014	4.74867	1.38135	3.4377	0.000586669	0.00150189
FBgn0035755	CG14830	uncharacterized protein	351.371	2.73213	0.279749	9.76635	1.57005e-22	4.17377e-21
FBgn0035763	CG8602	uncharacterized protein	2223.69	0.912563	0.0605024	15.0831	2.09233e-51	4.1806e-49
FBgn0035767	Cln7	Cln7	564.483	2.1579	0.180881	11.9299	8.26403e-33	4.829e-31
FBgn0035776	CG8564	uncharacterized protein	39.5852	4.66619	0.394771	11.82	3.07748e-32	1.70959e-30
FBgn0035777	CG8563	uncharacterized protein	413.056	5.88427	0.323593	18.1842	6.88582e-74	3.08076e-71
FBgn0035785	ppk26	pickpocket 26	5.17212	2.94171	0.80649	3.64755	0.000264757	0.000725942
FBgn0035790	Cyp316a1	Cyp316a1	7.03803	4.18966	0.826363	5.06999	3.97827e-07	1.74452e-06
FBgn0035798	frac	faulty attraction	56.591	1.05342	0.335138	3.14323	0.00167096	0.00389389
FBgn0035799	CG14838	uncharacterized protein	6.54542	3.51895	0.859619	4.09362	4.2469e-05	0.000134451
FBgn0035802	Pura	Puratrophin-1-like	2831.06	0.763795	0.34719	2.19993	0.0278117	0.0496443
FBgn0035806	PGRP-SD	Peptidoglycan recognition protein SD	25.7777	1.69028	0.481699	3.509	0.000449788	0.00117602
FBgn0035811	Mcad	Medium-chain acyl-CoA dehydrogenase	3163.45	0.565147	0.127552	4.4307	9.39263e-06	3.30369e-05
FBgn0035816	CG13685	uncharacterized protein	51.5135	2.39693	0.243794	9.83177	8.21589e-23	2.25174e-21
FBgn0035825	CG8111	uncharacterized protein	982.978	0.455575	0.121488	3.74995	0.00017687	0.00050013
FBgn0035844	CG13676	uncharacterized protein	155.601	0.507049	0.21529	2.3552	0.0185129	0.0344351
FBgn0035850	Atg18a	Autophagy-related 18a	1241	0.326162	0.1293	2.52252	0.0116516	0.0226593
FBgn0035852	CG7387	uncharacterized protein	5.92664	1.23228	0.534697	2.30464	0.0211868	0.0388833
FBgn0035858	CG13674	uncharacterized protein	27.5912	3.69021	0.490461	7.52396	5.31399e-14	5.98452e-13
FBgn0035859	CG13678	uncharacterized protein	63.1374	2.85629	0.315726	9.04671	1.47335e-19	3.04706e-18
FBgn0035865	CG7201	uncharacterized protein	7.14415	5.16554	1.5489	3.33498	0.000853053	0.00211648
FBgn0035877	CG7083	uncharacterized protein	392.96	0.393854	0.123621	3.18597	0.00144267	0.00340221
FBgn0035880	Culd	CUB and LDLa domain	379.728	0.978804	0.208098	4.70356	2.55662e-06	9.95642e-06
FBgn0035904	GstO3	Glutathione S transferase O3	357.18	2.86144	0.273908	10.4467	1.51702e-25	5.2494e-24
FBgn0035906	GstO2	Glutathione S transferase O2	1573.99	0.436311	0.152399	2.86295	0.00419717	0.00900338
FBgn0035914	CG6282	uncharacterized protein	292.884	2.68883	0.159368	16.8718	7.25112e-64	1.99615e-61
FBgn0035915	S-Lap1	Sperm-Leucylaminopeptidase 1	27.8201	2.94174	0.899192	3.27154	0.00106964	0.00259106
FBgn0035917	Zasp66	Z band alternatively spliced PDZ-motif protein 66	6105	2.30857	0.168151	13.7291	6.79341e-43	8.41568e-41
FBgn0035926	Acbp5	Acyl-CoA binding protein 5	189.596	4.65997	1.40014	3.32823	0.000874001	0.00216024
FBgn0035932	CG13308	uncharacterized protein	23.1385	2.98724	0.686755	4.3498	1.36264e-05	4.67929e-05
FBgn0035933	CG13309	uncharacterized protein	1146.45	2.63279	0.421423	6.24739	4.17361e-10	2.78121e-09
FBgn0035934	TrpA1	Transient receptor potential cation channel A1	10.3838	4.53429	1.31109	3.45842	0.000543348	0.00139792
FBgn0035949	CG13314	uncharacterized protein	39.9114	2.2894	0.337965	6.77408	1.252e-11	1.03055e-10
FBgn0035951	CG5068	uncharacterized protein	997.671	0.234624	0.0875745	2.67914	0.0073811	0.0149799
FBgn0035968	Slc45-1	Solute carrier family 45 member 1	1082.59	2.23236	0.363057	6.14879	7.80767e-10	4.99336e-09
FBgn0035975	PGRP-LA	Peptidoglycan recognition protein LA	175.824	2.58358	0.240264	10.7531	5.72964e-27	2.23204e-25
FBgn0035976	PGRP-LC	Peptidoglycan recognition protein LC	531.987	1.73095	0.250879	6.89954	5.21728e-12	4.54158e-11
FBgn0035977	PGRP-LF	Peptidoglycan recognition protein LF	58.5219	2.78801	0.232328	12.0004	3.53779e-33	2.11721e-31
FBgn0035985	Cpr67B	Cuticular protein 67B	83.3439	2.74899	0.47284	5.81379	6.10739e-09	3.44215e-08
FBgn0035995	CG3529	uncharacterized protein	912.536	0.792076	0.0825802	9.5916	8.67314e-22	2.1972e-20
FBgn0036014	CG3222	uncharacterized protein	3.28795	2.79102	1.14305	2.44172	0.0146173	0.027807
FBgn0036023	CG18179	uncharacterized protein	25.5615	4.91522	1.16555	4.21709	2.47472e-05	8.17296e-05
FBgn0036024	CG18180	uncharacterized protein	313.761	8.04515	1.1749	6.84751	7.51487e-12	6.3676e-11
FBgn0036056	CG6709	uncharacterized protein	43.4657	0.864161	0.368377	2.34586	0.0189832	0.0352147
FBgn0036066	CG14160	uncharacterized protein	20.9018	3.43554	1.05653	3.25172	0.00114711	0.00275822
FBgn0036072	CG6628	uncharacterized protein	11.828	3.62965	0.620006	5.85421	4.7928e-09	2.73483e-08
FBgn0036091	CG18628	uncharacterized protein	545.919	2.6343	0.683797	3.85246	0.000116938	0.000341174
FBgn0036094	CG14153	uncharacterized protein	27.7596	2.76839	0.457282	6.05402	1.41277e-09	8.74198e-09
FBgn0036101	NijA	Ninjurin A	615.508	1.63714	0.236749	6.9151	4.67536e-12	4.08739e-11
FBgn0036102	CG12523	uncharacterized protein	14.8876	4.26559	0.57415	7.42939	1.091e-13	1.17422e-12
FBgn0036106	CG6409	uncharacterized protein	778.03	2.07646	0.51486	4.03306	5.50554e-05	0.000170507
FBgn0036116	CG7888	uncharacterized protein	72.7997	2.42991	0.417636	5.81826	5.94631e-09	3.359e-08
FBgn0036121	CG6310	uncharacterized protein	948.658	0.673196	0.22248	3.02588	0.00247912	0.00556064
FBgn0036133	CG7638	uncharacterized protein	1478.68	0.262141	0.0796891	3.28954	0.00100352	0.00244564
FBgn0036141	wls	wntless	1232.44	0.715819	0.101164	7.07581	1.48578e-12	1.39756e-11
FBgn0036157	CG7560	uncharacterized protein	28.9957	1.97528	0.458126	4.31166	1.62036e-05	5.48594e-05
FBgn0036165	chrb	charybde	3499.48	0.520093	0.206028	2.52437	0.0115905	0.0225581
FBgn0036168	CG7512	uncharacterized protein	186.924	2.18219	0.165306	13.2009	8.66555e-40	8.72755e-38
FBgn0036179	CG7368	uncharacterized protein	21.8026	1.39803	0.393893	3.54926	0.000386311	0.00102396
FBgn0036180	Duba	Deubiquitinating enzyme A	1253.8	0.194572	0.0754592	2.57851	0.00992274	0.0196081
FBgn0036186	CG6071	uncharacterized protein	83.6496	1.2746	0.391975	3.25173	0.00114704	0.00275822
FBgn0036194	Dph1	Diphthamide biosynthesis 1	1019.55	0.887797	0.12078	7.35053	1.97425e-13	2.06389e-12
FBgn0036196	CG11658	uncharacterized protein	462.743	1.46196	0.234075	6.24569	4.21935e-10	2.81018e-09
FBgn0036198	crim	crimpled	462.227	0.541197	0.176648	3.0637	0.00218617	0.00496923
FBgn0036208	CG10361	uncharacterized protein	86.6972	2.05942	0.265374	7.76042	8.46458e-15	1.06755e-13
FBgn0036237	viaf	viral IAP-associated factor	2150.75	0.644676	0.150324	4.28857	1.79829e-05	6.05523e-05
FBgn0036257	RhoGAP68F	Rho GTPase activating protein at 68F	1069.01	0.479286	0.0888268	5.39574	6.8241e-08	3.35065e-07
FBgn0036259	CG9760	uncharacterized protein	161.708	1.8959	0.237562	7.98064	1.45579e-15	2.03089e-14
FBgn0036260	Rh7	Rhodopsin 7	30.3438	1.75249	0.444771	3.94022	8.14071e-05	0.000244656
FBgn0036262	CG6910	uncharacterized protein	655.647	2.55347	0.45222	5.64653	1.63719e-08	8.74956e-08
FBgn0036264	CG11529	uncharacterized protein	1.48165	3.49681	1.56528	2.23398	0.0254845	0.0459002
FBgn0036271	Pbgs	Porphobilinogen synthase	463.419	0.618734	0.127779	4.84222	1.28394e-06	5.22691e-06
FBgn0036273	INPP5E	Inositol polyphosphate 5-phosphatase E	329.851	0.391764	0.142414	2.75088	0.0059435	0.0123267
FBgn0036278	CrzR	Corazonin receptor	129.365	1.8459	0.365229	5.05408	4.32461e-07	1.88174e-06
FBgn0036279	Ncc69	sodium chloride cotransporter 69	4503.5	2.7674	0.0936029	29.5653	4.17802e-192	5.17573e-188
FBgn0036282	Smyd4-2	SET and MYND domain containing, class 4, member 2	234.362	2.95148	0.249554	11.827	2.82972e-32	1.57904e-30
FBgn0036286	CG10616	uncharacterized protein	675.108	0.37891	0.0809826	4.67891	2.88407e-06	1.11235e-05
FBgn0036287	CG10663	uncharacterized protein	70.7091	2.90189	0.237975	12.1941	3.34201e-34	2.15629e-32
FBgn0036288	CG10660	uncharacterized protein	196.049	1.9073	0.204791	9.31342	1.23779e-20	2.84534e-19
FBgn0036289	CG10657	uncharacterized protein	170.029	1.67394	0.251736	6.64956	2.93962e-11	2.2817e-10
FBgn0036298	nst	nesthocker	2126.34	0.373058	0.0726175	5.1373	2.78708e-07	1.25005e-06
FBgn0036299	Tsf2	Transferrin 2	1177.13	1.05258	0.0924964	11.3796	5.28198e-30	2.58629e-28
FBgn0036302	sowah	sosondowah	959.606	0.76372	0.0727473	10.4982	8.79988e-26	3.14158e-24
FBgn0036318	Wbp2	WW domain binding protein 2	1767.86	1.07945	0.0859294	12.5621	3.41132e-36	2.60861e-34
FBgn0036319	Ent3	Equilibrative nucleoside transporter 3	21.298	1.59216	0.45943	3.46552	0.000529207	0.00136523
FBgn0036323	CG14118	uncharacterized protein	18.1101	1.93535	0.419205	4.61671	3.89871e-06	1.46622e-05
FBgn0036341	Syx13	Syntaxin 13	789.625	0.19127	0.0782276	2.44504	0.0144835	0.0275778
FBgn0036353	CG10171	uncharacterized protein	862.963	0.443146	0.0963381	4.59991	4.22677e-06	1.58191e-05
FBgn0036364	CG14109	uncharacterized protein	282.606	2.88503	0.231636	12.455	1.31363e-35	9.68643e-34
FBgn0036365	cmb	combover	1458.11	1.08623	0.162275	6.69375	2.17521e-11	1.71744e-10
FBgn0036367	CG10116	uncharacterized protein	33.6598	3.24759	0.969126	3.35105	0.000805063	0.00200707
FBgn0036368	CG10738	uncharacterized protein	882.396	1.96418	0.30958	6.34466	2.22915e-10	1.54359e-09
FBgn0036369	CG10089	uncharacterized protein	65.7601	1.98011	0.264817	7.47728	7.58757e-14	8.38491e-13
FBgn0036372	Abp1	Actin binding protein 1	1320.33	0.228568	0.0910444	2.51052	0.0120555	0.0233824
FBgn0036373	Tgi	Tondu-domain-containing Growth Inhibitor	754.206	0.971131	0.351109	2.76589	0.0056767	0.0118293
FBgn0036377	CG10710	uncharacterized protein	264.239	2.60709	0.251954	10.3475	4.29501e-25	1.44977e-23
FBgn0036381	CG8745	uncharacterized protein	432.442	2.60106	0.343101	7.58104	3.42804e-14	3.97627e-13
FBgn0036410	CG8100	uncharacterized protein	30.6873	2.90894	0.526011	5.5302	3.19867e-08	1.64967e-07
FBgn0036416	CG7924	uncharacterized protein	9.31939	1.53863	0.486567	3.16221	0.00156576	0.00366666
FBgn0036419	CG13482	uncharacterized protein	64.65	4.73314	1.4533	3.25683	0.00112664	0.0027185
FBgn0036422	CG3868	uncharacterized protein	59.371	3.1184	1.11471	2.7975	0.00515004	0.0108464
FBgn0036428	Gbs-70E	Glycogen binding subunit 70E	1422.32	0.772284	0.13639	5.66231	1.49352e-08	8.01632e-08
FBgn0036433	CG9628	uncharacterized protein	427.193	1.98662	0.210581	9.43398	3.94814e-21	9.442e-20
FBgn0036447	CG17173	uncharacterized protein	4.33125	2.36025	0.643482	3.66793	0.000244522	0.000674341
FBgn0036454	CG17839	uncharacterized protein	566.215	1.81116	0.267721	6.7651	1.33219e-11	1.09148e-10
FBgn0036461	Zip71B	Zinc/iron regulated transporter-related protein 71B	491.226	2.17916	0.379967	5.73513	9.7438e-09	5.32449e-08
FBgn0036463	Reck	Reversion-inducing-cysteine-rich protein with kazal motifs	188.407	1.76642	0.286192	6.17215	6.73685e-10	4.35348e-09
FBgn0036465	Rpn12R	Regulatory particle non-ATPase 12-related	2.43414	4.35435	1.2651	3.44189	0.000577661	0.00148097
FBgn0036481	CG16959	uncharacterized protein	19.1113	1.14512	0.413308	2.77061	0.00559509	0.0116687
FBgn0036494	Toll-6	Toll-6	6.60601	4.50222	0.878281	5.12618	2.95683e-07	1.3214e-06
FBgn0036501	CG7272	uncharacterized protein	595.462	1.52472	0.154963	9.83928	7.62522e-23	2.10381e-21
FBgn0036503	CG13454	uncharacterized protein	3.8007	3.19499	1.31037	2.43823	0.0147595	0.0280559
FBgn0036509	CG7739	uncharacterized protein	1055.41	0.633504	0.146398	4.32728	1.50965e-05	5.1378e-05
FBgn0036520	CG13449	uncharacterized protein	3.93802	5.25114	0.980476	5.3557	8.52241e-08	4.1128e-07
FBgn0036529	Pgant8	Polypeptide N-Acetylgalactosaminyltransferase 8	12.7878	2.07132	0.409793	5.05455	4.31399e-07	1.87778e-06
FBgn0036547	CG17032	uncharacterized protein	382.716	3.70455	0.270482	13.6961	1.07131e-42	1.30112e-40
FBgn0036549	CG10516	uncharacterized protein	608.779	1.04326	0.179703	5.80544	6.41977e-09	3.60999e-08
FBgn0036550	CG17026	uncharacterized protein	165.09	2.77078	0.384481	7.20654	5.73906e-13	5.66498e-12
FBgn0036551	CG17029	uncharacterized protein	790.539	2.47881	0.271039	9.14557	5.93186e-20	1.28244e-18
FBgn0036552	CG17028	uncharacterized protein	90.0104	2.82453	0.372452	7.58362	3.36057e-14	3.91266e-13
FBgn0036553	CG17027	uncharacterized protein	315.517	2.67693	0.435165	6.15152	7.6743e-10	4.91822e-09
FBgn0036560	CG5895	uncharacterized protein	24.0091	0.84423	0.376424	2.24276	0.0249123	0.0449678
FBgn0036566	ClC-c	Chloride channel-c	2192.65	0.343583	0.0836163	4.10904	3.97309e-05	0.000126202
FBgn0036568	ATPsynbetaL	ATP synthase, beta subunit-like	6.28143	2.35881	0.704391	3.34872	0.000811862	0.00202239
FBgn0036575	CG5157	uncharacterized protein	15.0664	2.85183	0.490048	5.81949	5.90282e-09	3.33595e-08
FBgn0036576	CG5151	uncharacterized protein	2008.83	1.13546	0.220018	5.16077	2.45937e-07	1.11152e-06
FBgn0036577	CG13073	uncharacterized protein	17.1917	2.46455	0.69845	3.52861	0.000417755	0.00109922
FBgn0036587	CG4950	uncharacterized protein	1504.82	2.31865	0.352906	6.57014	5.02663e-11	3.80856e-10
[truncated: 1,685 more rows]

## Sheet: Down in emerin mut.
Table S1. RNA-seq data used in the study
Gene_ID	Symbol	Gene_Name	baseMean	Log2FC	IFcSE	stat	pvalue	adjusted pvalue
FBgn0000008	a	arc	687.594	-1.18928	0.274574	-4.33136	1.48192e-05	5.05036e-05
FBgn0000018	abo	abnormal oocyte	412.127	-0.539581	0.128172	-4.20983	2.55566e-05	8.41784e-05
FBgn0000032	Acph-1	Acid phosphatase 1	1351.5	-0.937617	0.134283	-6.9824	2.90182e-12	2.61248e-11
FBgn0000038	nAChRbeta1	nicotinic Acetylcholine Receptor beta1	14.6374	-1.84178	0.655034	-2.81173	0.00492756	0.0104186
FBgn0000045	Act79B	Actin 79B	283.331	-2.89394	1.25554	-2.30495	0.0211695	0.0388573
FBgn0000052	Pfas	Phosphoribosylformylglycinamidine synthase	4890.26	-1.12711	0.446512	-2.52426	0.0115944	0.0225622
FBgn0000053	Gart	GART trifunctional enzyme	7129.77	-1.05751	0.321464	-3.28968	0.001003	0.00244494
FBgn0000057	adp	adipose	801.926	-0.300494	0.0745778	-4.02927	5.59508e-05	0.00017315
FBgn0000063	Mps1	Monopolar spindle 1	285.235	-0.663589	0.165987	-3.99784	6.39219e-05	0.00019557
FBgn0000108	Appl	beta amyloid protein precursor-like	103.996	-1.34687	0.433653	-3.10588	0.00189716	0.00436678
FBgn0000109	Aprt	Adenine phosphoribosyltransferase	617.439	-0.592292	0.206746	-2.86483	0.00417237	0.00895638
FBgn0000114	bru1	bruno 1	22265.9	-2.32561	0.431719	-5.38685	7.1703e-08	3.50259e-07
FBgn0000139	ash2	absent, small, or homeotic discs 2	1036.1	-0.281109	0.0993684	-2.82895	0.00467007	0.00991309
FBgn0000140	asp	abnormal spindle	2438.75	-1.42727	0.190729	-7.48325	7.2509e-14	8.03436e-13
FBgn0000146	aub	aubergine	4228.36	-1.89415	0.232273	-8.15485	3.49601e-16	5.2179e-15
FBgn0000147	aurA	aurora A	570.751	-0.71956	0.139597	-5.15455	2.54244e-07	1.14572e-06
FBgn0000150	awd	abnormal wing discs	45046.4	-0.613209	0.222918	-2.75083	0.00594443	0.0123267
FBgn0000158	bam	bag of marbles	416.752	-2.16181	0.343562	-6.29234	3.12711e-10	2.1215e-09
FBgn0000166	bcd	bicoid	469.494	-2.10359	0.255299	-8.23972	1.7262e-16	2.66636e-15
FBgn0000181	bic	bicaudal	39151.7	-0.569895	0.153662	-3.70876	0.00020828	0.000580598
FBgn0000182	BicC	Bicaudal C	3701.95	-2.1522	0.496084	-4.33837	1.43544e-05	4.90952e-05
FBgn0000183	BicD	Bicaudal D	4175.53	-0.812301	0.123154	-6.59579	4.23005e-11	3.22807e-10
FBgn0000228	Bsg25D	Blastoderm-specific gene 25D	1599.25	-0.573414	0.129123	-4.44082	8.96148e-06	3.16552e-05
FBgn0000233	btd	buttonhead	21.8105	-3.04061	0.530604	-5.73046	1.00157e-08	5.46105e-08
FBgn0000239	bur	burgundy	6219.01	-0.960255	0.117993	-8.13822	4.0114e-16	5.95129e-15
FBgn0000246	c(3)G	crossover suppressor on 3 of Gowen	1327.26	-1.83311	0.186269	-9.84121	7.48064e-23	2.06853e-21
FBgn0000253	Cam	Calmodulin	17345.7	-0.461959	0.141842	-3.25686	0.00112653	0.0027185
FBgn0000259	CkIIbeta	Casein kinase II beta subunit	5280.86	-0.834015	0.171726	-4.85666	1.1938e-06	4.87434e-06
FBgn0000274	Pka-C2	Protein kinase, cAMP-dependent, catalytic subunit 2	77.3567	-1.51059	0.586331	-2.57634	0.00998524	0.0197185
FBgn0000283	Cp190	Centrosomal protein 190kD	4464.57	-0.576446	0.147037	-3.92043	8.83929e-05	0.000263985
FBgn0000289	cg	combgap	5579.22	-0.559092	0.0927148	-6.03023	1.63725e-09	9.99618e-09
FBgn0000307	chif	chiffon	2599.52	-0.560059	0.240862	-2.32522	0.0200601	0.0370294
FBgn0000316	cin	cinnamon	2537.96	-0.756084	0.126601	-5.97216	2.34136e-09	1.40527e-08
FBgn0000346	comt	comatose	686.076	-1.1138	0.184358	-6.04151	1.52676e-09	9.3817e-09
FBgn0000351	cort	cortex	253.671	-1.32971	0.294361	-4.51727	6.26421e-06	2.27436e-05
FBgn0000352	cos	costa	1066.87	-0.680959	0.121735	-5.5938	2.22156e-08	1.16811e-07
FBgn0000376	NA	NA	1178.06	-0.59062	0.246561	-2.39543	0.0166007	0.031249
FBgn0000377	crn	crooked neck	1590.14	-0.429116	0.109297	-3.92615	8.63181e-05	0.000258349
FBgn0000384	cta	concertina	1511.23	-0.94809	0.19634	-4.82882	1.37343e-06	5.57107e-06
FBgn0000392	cup	cup	3545.96	-2.41869	0.278823	-8.67465	4.14842e-18	7.65881e-17
FBgn0000404	CycA	Cyclin A	11701.9	-1.97289	0.288375	-6.84142	7.84136e-12	6.62611e-11
FBgn0000405	CycB	Cyclin B	18301.3	-1.9793	0.312859	-6.32649	2.50802e-10	1.72129e-09
FBgn0000412	D1	D1 chromosomal protein	10930.6	-0.746336	0.139713	-5.34193	9.19613e-08	4.41557e-07
FBgn0000426	SmF	Small ribonucleoprotein particle protein SmF	1996.56	-1.26537	0.212837	-5.94524	2.76047e-09	1.64013e-08
FBgn0000447	Dhod	Dihydroorotate dehydrogenase	3133.33	-0.663802	0.16245	-4.08619	4.38521e-05	0.000138511
FBgn0000449	dib	disembodied	139.52	-2.08274	0.582674	-3.57445	0.000350964	0.00093762
FBgn0000463	Dl	Delta	2931.78	-2.67897	0.331136	-8.09026	5.95375e-16	8.67902e-15
FBgn0000524	dx	deltex	1460.31	-0.680254	0.173351	-3.92413	8.70436e-05	0.000260269
FBgn0000533	ea	easter	631.375	-1.31375	0.240767	-5.45652	4.85548e-08	2.43916e-07
FBgn0000541	E(bx)	Enhancer of bithorax	6704.43	-1.06232	0.195566	-5.43205	5.57097e-08	2.76717e-07
FBgn0000547	ed	echinoid	5509.1	-0.859809	0.207695	-4.13977	3.47661e-05	0.000111489
FBgn0000559	eEF2	eukaryotic translation elongation factor 2	169614	-0.416583	0.145725	-2.85869	0.00425398	0.00911263
FBgn0000562	egl	egalitarian	3265.46	-0.423558	0.0996976	-4.24842	2.15281e-05	7.16908e-05
FBgn0000588	esc	extra sexcombs	698.338	-0.576759	0.122458	-4.70985	2.47896e-06	9.67833e-06
FBgn0000615	exu	exuperantia	3570.93	-2.01158	0.430804	-4.66936	3.02142e-06	1.16132e-05
FBgn0000617	e(y)1	enhancer of yellow 1	1003.29	-0.358679	0.137358	-2.61127	0.00902073	0.0179718
FBgn0000618	e(y)2	enhancer of yellow 2	403.325	-0.808853	0.282992	-2.85821	0.00426034	0.00912467
FBgn0000629	E(z)	Enhancer of zeste	1332.63	-0.483036	0.0955313	-5.05631	4.27447e-07	1.86254e-06
FBgn0000808	gd	gastrulation-defective	119.704	-1.54897	0.192344	-8.05312	8.07071e-16	1.15584e-14
FBgn0000810	fs(1)K10	female sterile (1) K10	1784.66	-1.44937	0.163521	-8.86353	7.75198e-19	1.53897e-17
FBgn0000826	png	pan gu	495.281	-0.907247	0.239335	-3.7907	0.000150222	0.000430775
FBgn0000927	fs(1)Ya	female sterile (1) Young arrest	1406.12	-1.2897	0.516653	-2.49625	0.0125515	0.0242382
FBgn0000964	tj	traffic jam	2986.2	-1.01272	0.330808	-3.06134	0.00220346	0.00500485
FBgn0000996	dup	double parked	1844.79	-0.930575	0.12284	-7.57553	3.57671e-14	4.12939e-13
FBgn0001078	ftz-f1	ftz transcription factor 1	3719.17	-0.832816	0.22444	-3.71064	0.000206735	0.00057668
FBgn0001079	NA	NA	704.219	-0.308575	0.103748	-2.97427	0.00293686	0.00650255
FBgn0001086	fzy	fizzy	1181.52	-0.877836	0.158256	-5.54694	2.90715e-08	1.50938e-07
FBgn0001087	g	garnet	1722.4	-0.472535	0.103544	-4.56364	5.02747e-06	1.8569e-05
FBgn0001099	gdl	gonadal	175.756	-1.00529	0.272983	-3.6826	0.000230864	0.000639237
FBgn0001104	Galphai	G protein alpha i subunit	4422.31	-0.51826	0.119215	-4.34725	1.37852e-05	4.73051e-05
FBgn0001120	gnu	giant nuclei	1620.72	-2.15872	0.439379	-4.91312	8.9639e-07	3.74519e-06
FBgn0001179	hay	haywire	955.385	-0.388267	0.0765182	-5.07418	3.89178e-07	1.70841e-06
FBgn0001197	His2Av	Histone H2A variant	12678.9	-1.08266	0.176374	-6.13842	8.33465e-10	5.3112e-09
FBgn0001215	Hrb98DE	Heterogeneous nuclear ribonucleoprotein at 98DE	13809	-0.433844	0.115787	-3.74692	0.000179019	0.000505399
FBgn0001220	Hsc70-5	Heat shock protein cognate 5	15644.9	-0.498172	0.0733056	-6.79582	1.07699e-11	8.91829e-11
FBgn0001222	Hsf	Heat shock factor	1821.69	-0.272426	0.0836402	-3.25712	0.00112547	0.00271727
FBgn0001233	Hsp83	Heat shock protein 83	125586	-0.581837	0.171048	-3.4016	0.000669938	0.00169233
FBgn0001280	janA	janus A	2158.48	-0.912231	0.207766	-4.39066	1.13007e-05	3.91917e-05
FBgn0001296	kar	karmoisin	3007.46	-0.334426	0.142338	-2.34952	0.0187978	0.0349336
FBgn0001316	klar	klarsicht	10336.5	-0.79441	0.233351	-3.40435	0.000663223	0.00167776
FBgn0001330	kz	kurz	1893.61	-1.05615	0.149646	-7.0577	1.69277e-12	1.57788e-11
FBgn0001341	Mybbp1A	MYB binding protein 1a	4453.51	-1.37962	0.178316	-7.73694	1.01838e-14	1.26791e-13
FBgn0001491	l(1)10Bb	lethal (1) 10Bb	909.668	-0.6712	0.191199	-3.51047	0.000447309	0.00117028
FBgn0001565	Hlc	Helicase	3551.69	-0.524938	0.126812	-4.13951	3.4805e-05	0.000111585
FBgn0001942	eIF4A	eukaryotic translation initiation factor 4A	53206.7	-0.288656	0.0988254	-2.92087	0.00349056	0.00761956
FBgn0001978	stc	shuttle craft	4491.4	-0.559779	0.204427	-2.73828	0.00617613	0.0127559
FBgn0001986	Mtr4	Mtr4 helicase	3242.1	-1.17247	0.140631	-8.33723	7.60538e-17	1.24789e-15
FBgn0001990	wek	weckle	516.552	-0.674186	0.146368	-4.60609	4.10305e-06	1.53933e-05
FBgn0001994	crp	cropped	4776.67	-0.426524	0.17088	-2.49605	0.0125586	0.0242481
FBgn0001995	mRpL4	mitochondrial ribosomal protein L4	1223.81	-0.419542	0.121897	-3.44176	0.000577935	0.00148137
FBgn0002021	l(2)37Bb	lethal (2) 37Bb	1286.99	-0.358237	0.110252	-3.24925	0.00115709	0.00278116
FBgn0002031	l(2)37Cc	lethal (2) 37Cc	8681.77	-0.378582	0.1468	-2.5789	0.00991164	0.0195893
FBgn0002069	AspRS	Aspartyl-tRNA synthetase	5275.54	-0.491673	0.116395	-4.22418	2.3981e-05	7.93261e-05
FBgn0002183	dre4	dre4	6734.37	-0.79267	0.115149	-6.88388	5.82445e-12	5.0281e-11
FBgn0002283	l(3)73Ah	lethal (3) 73Ah	1245.3	-1.06987	0.231379	-4.62389	3.76607e-06	1.41892e-05
FBgn0002284	Prosbeta6	Proteasome beta6 subunit	4398.59	-0.467326	0.0962206	-4.85682	1.19286e-06	4.87371e-06
FBgn0002354	l(3)87Df	lethal (3) 87Df	338.286	-0.834866	0.240365	-3.47332	0.000514056	0.00133057
FBgn0002413	dco	discs overgrown	6180.67	-0.409938	0.112069	-3.65791	0.00025428	0.000699384
FBgn0002440	l(3)mbn	lethal (3) malignant blood neoplasm	7.68576	-2.30765	0.794396	-2.90491	0.00367364	0.00797146
FBgn0002466	sti	sticky	1460.7	-0.837049	0.273767	-3.05752	0.00223176	0.00505893
FBgn0002521	pho	pleiohomeotic	1332.59	-0.724391	0.194608	-3.72231	0.000197405	0.000553395
FBgn0002542	lds	lodestar	2126.23	-0.73361	0.124194	-5.90695	3.48498e-09	2.04219e-08
FBgn0002552	lin	lines	744.017	-0.461196	0.102895	-4.48218	7.3884e-06	2.64913e-05
FBgn0002577	m	miniature	33.4783	-1.8101	0.29717	-6.09113	1.12119e-09	7.01124e-09
FBgn0002579	RpL36	Ribosomal protein L36	43784.9	-0.670125	0.188888	-3.54774	0.000388552	0.00102916
FBgn0002593	RpLP1	Ribosomal protein LP1	56913.2	-0.447138	0.167889	-2.66329	0.00773796	0.0156554
FBgn0002609	E(spl)m3-HLH	Enhancer of split m3, helix-loop-helix	1129.84	-0.766724	0.208144	-3.68363	0.000229935	0.000636805
FBgn0002622	RpS3	Ribosomal protein S3	57511.2	-0.391963	0.141785	-2.76449	0.00570111	0.0118758
FBgn0002626	RpL32	Ribosomal protein L32	45138.7	-0.554837	0.152853	-3.62986	0.000283572	0.000772422
FBgn0002632	E(spl)m6-BFM	Enhancer of split m6, Bearded family member	7.04451	-2.17685	0.757534	-2.8736	0.00405824	0.00872954
FBgn0002633	E(spl)m7-HLH	Enhancer of split m7, helix-loop-helix	76.7407	-0.752995	0.279137	-2.69758	0.00698446	0.0142426
FBgn0002638	Rcc1	Regulator of chromosome condensation 1	7911.65	-1.46957	0.234292	-6.27239	3.55547e-10	2.39636e-09
FBgn0002641	mal	maroon-like	783.643	-0.525902	0.13466	-3.9054	9.40678e-05	0.000279787
FBgn0002673	twe	twine	327.161	-1.26614	0.234889	-5.39036	7.03151e-08	3.4375e-07
FBgn0002707	mei-9	meiotic 9	897.169	-0.761243	0.148614	-5.12227	3.01875e-07	1.34519e-06
FBgn0002709	mei-218	meiotic 218	591.858	-0.795268	0.205662	-3.86686	0.000110244	0.00032332
FBgn0002715	mei-S332	meiotic from via Salaria 332	183.146	-0.593934	0.128181	-4.63355	3.59452e-06	1.35923e-05
FBgn0002716	mei-W68	meiotic W68	68.1287	-0.942876	0.187397	-5.03142	4.86851e-07	2.10657e-06
FBgn0002723	Met	Methoprene-tolerant	744.702	-0.650534	0.218513	-2.97709	0.00290994	0.00644642
FBgn0002732	E(spl)malpha-BFM	Enhancer of split malpha, Bearded family member	29.8907	-1.17937	0.339098	-3.47797	0.000505231	0.00131102
FBgn0002736	mago	mago nashi	2605.92	-1.01156	0.172494	-5.86435	4.50886e-09	2.58711e-08
FBgn0002774	mle	maleless	2298.23	-0.52025	0.127413	-4.08318	4.44229e-05	0.000140028
FBgn0002778	mnd	minidiscs	2170.57	-1.52659	0.170609	-8.9479	3.62298e-19	7.28595e-18
FBgn0002780	mod	modulo	30840.5	-1.28942	0.160537	-8.03191	9.59636e-16	1.36174e-14
FBgn0002781	mod(mdg4)	modifier of mdg4	7093.49	-0.493489	0.111406	-4.42964	9.43888e-06	3.31807e-05
FBgn0002783	mor	moira	4446.31	-0.356998	0.106939	-3.33833	0.000842841	0.00209283
FBgn0002791	mr	morula	820.513	-0.423892	0.073582	-5.7608	8.37139e-09	4.62143e-08
FBgn0002872	mu2	mutator 2	1734.92	-1.99491	0.202574	-9.84781	7.00516e-23	1.95011e-21
FBgn0002873	mud	mushroom body defect	4255.99	-1.77237	0.237556	-7.46084	8.59731e-14	9.40843e-13
FBgn0002878	mus101	mutagen-sensitive 101	858.138	-0.892767	0.24097	-3.70489	0.000211486	0.000589003
FBgn0002887	mus201	mutagen-sensitive 201	662.049	-0.935634	0.163016	-5.73953	9.49419e-09	5.19728e-08
FBgn0002899	mus301	mutagen-sensitive 301	512.157	-0.785403	0.121032	-6.48922	8.62845e-11	6.29872e-10
FBgn0002901	mus304	mutagen-sensitive 304	291.801	-0.669128	0.142963	-4.68042	2.86286e-06	1.10552e-05
FBgn0002905	mus308	mutagen-sensitive 308	1026.4	-1.22664	0.18945	-6.47475	9.49666e-11	6.89998e-10
FBgn0002906	Blm	Bloom syndrome helicase	743.27	-0.753268	0.21475	-3.50764	0.000452096	0.0011813
FBgn0002909	mus312	mutagen-sensitive 312	626.266	-0.816238	0.142271	-5.73721	9.62464e-09	5.2617e-08
FBgn0002914	Myb	Myb oncogene-like	3180.06	-0.406555	0.102916	-3.95035	7.80374e-05	0.000235328
FBgn0002926	ndl	nudel	1734.42	-2.99723	0.450959	-6.64634	3.00474e-11	2.32933e-10
FBgn0002932	neur	neuralized	841.792	-0.544498	0.130475	-4.17322	3.00329e-05	9.74968e-05
FBgn0002948	nod	no distributive disjunction	738.701	-1.18252	0.172379	-6.86001	6.88548e-12	5.86324e-11
FBgn0002962	nos	nanos	1517.67	-1.38202	0.245645	-5.62609	1.84342e-08	9.78417e-08
FBgn0002989	okr	okra	635.957	-0.797831	0.13082	-6.09868	1.06946e-09	6.70811e-09
FBgn0003008	or	orange	470.882	-0.70862	0.190858	-3.71281	0.000204973	0.00057228
FBgn0003015	osk	oskar	30665.9	-2.42597	0.452323	-5.36337	8.16851e-08	3.95743e-07
FBgn0003023	otu	ovarian tumor	3829.84	-2.35574	0.329369	-7.15229	8.53448e-13	8.25978e-12
FBgn0003028	ovo	ovo	5203.45	-1.94025	0.384528	-5.0458	4.51618e-07	1.96303e-06
FBgn0003042	Pc	Polycomb	394.717	-0.424524	0.120402	-3.52588	0.000422071	0.0011087
FBgn0003044	Pcl	Polycomblike	2669.49	-1.01861	0.15804	-6.44527	1.15392e-10	8.2724e-10
FBgn0003053	peb	pebbled	1409.39	-1.58705	0.408207	-3.88785	0.000101134	0.000299009
FBgn0003062	Fib	Fibrillarin	15307.9	-0.830266	0.299518	-2.772	0.00557127	0.0116268
FBgn0003079	Raf	Raf oncogene	1161.69	-0.582027	0.0791854	-7.35018	1.97948e-13	2.0676e-12
FBgn0003082	phr	photorepair	1546.76	-0.838239	0.252963	-3.31369	0.000920742	0.00225909
FBgn0003087	pim	pimples	194.968	-0.703889	0.266279	-2.64343	0.00820707	0.0165208
FBgn0003089	pip	pipe	33.0676	-1.88963	0.366512	-5.15571	2.52669e-07	1.13987e-06
FBgn0003114	plu	plutonium	162.561	-2.25297	0.472875	-4.76441	1.89409e-06	7.51568e-06
FBgn0003116	pn	prune	595.464	-1.02356	0.162726	-6.29008	3.17293e-10	2.14906e-09
FBgn0003118	pnt	pointed	1147.04	-0.714635	0.136477	-5.23632	1.63807e-07	7.59161e-07
FBgn0003124	polo	polo	3839.86	-0.764263	0.098009	-7.79789	6.29515e-15	8.05623e-14
FBgn0003139	PpV	Protein phosphatase V	2206.57	-0.51464	0.151253	-3.40251	0.000667708	0.00168842
FBgn0003141	pr	purple	1150.06	-0.47516	0.145212	-3.27218	0.00106721	0.00258618
FBgn0003187	qua	quail	844.683	-1.84912	0.261263	-7.07762	1.46656e-12	1.38053e-11
FBgn0003189	r	rudimentary	10025	-1.29756	0.444426	-2.91962	0.00350453	0.00764602
FBgn0003204	ras	raspberry	6767.27	-0.59086	0.164298	-3.59626	0.000322828	0.000868634
FBgn0003210	rb	ruby	2114.53	-0.347464	0.152576	-2.27732	0.022767	0.0414518
FBgn0003227	rec	recombination-defective	486.27	-0.581374	0.153696	-3.78262	0.000155186	0.000443983
FBgn0003256	rl	rolled	2306.61	-0.556232	0.161807	-3.43763	0.000586834	0.001502
FBgn0003257	r-l	rudimentary-like	5798.74	-1.30053	0.254659	-5.10693	3.27442e-07	1.45389e-06
FBgn0003268	rod	rough deal	1324.89	-1.03415	0.237605	-4.3524	1.34656e-05	4.63493e-05
FBgn0003275	RpII18	RNA polymerase II 18kD subunit	1976.42	-0.773792	0.223693	-3.45917	0.000541847	0.00139484
FBgn0003277	RpII215	RNA polymerase II 215kD subunit	6047.86	-0.739571	0.150597	-4.91094	9.0642e-07	3.78199e-06
FBgn0003278	RpI135	RNA polymerase I 135kD subunit	3225.77	-1.19805	0.154002	-7.77944	7.28444e-15	9.24587e-14
FBgn0003292	rt	rotated abdomen	386.319	-2.37294	0.204248	-11.6179	3.34123e-31	1.77644e-29
FBgn0003302	rux	roughex	245.154	-0.639905	0.137112	-4.66704	3.05573e-06	1.17342e-05
FBgn0003310	S	Star	2772.25	-1.36635	0.218154	-6.26322	3.7711e-10	2.53343e-09
FBgn0003312	sad	shadow	256.509	-1.58779	0.356992	-4.44769	8.67972e-06	3.07652e-05
FBgn0003317	sax	saxophone	1053.81	-0.279257	0.105358	-2.65056	0.00803579	0.0161918
FBgn0003334	Scm	Sex comb on midleg	1688.97	-0.546537	0.104389	-5.23556	1.64483e-07	7.6144e-07
FBgn0003346	RanGAP	Ran GTPase activating protein	3716.06	-1.20586	0.122425	-9.84983	6.86606e-23	1.91569e-21
FBgn0003353	sei	seizure	448.423	-1.33042	0.343294	-3.87546	0.000106425	0.000313307
FBgn0003360	sesB	stress-sensitive B	63868	-0.487897	0.17187	-2.83875	0.00452907	0.00965018
FBgn0003401	shu	shutdown	2579.49	-1.47529	0.143189	-10.3031	6.82216e-25	2.24768e-23
FBgn0003423	slgA	sluggish A	4874.03	-0.307662	0.0715224	-4.30162	1.69551e-05	5.72783e-05
FBgn0003450	snk	snake	94.4874	-1.50246	0.550314	-2.73019	0.00632988	0.0130387
FBgn0003459	stwl	stonewall	1097.36	-0.794916	0.130376	-6.0971	1.08012e-09	6.77151e-09
FBgn0003475	spir	spire	1479.67	-0.721617	0.301961	-2.38976	0.0168592	0.031625
FBgn0003480	spn-B	spindle B	181.971	-1.05737	0.236922	-4.46293	8.08451e-06	2.88121e-05
FBgn0003482	spn-D	spindle D	65.8595	-0.996067	0.299704	-3.3235	0.000888954	0.0021937
FBgn0003483	spn-E	spindle E	3708.09	-1.03257	0.195279	-5.28767	1.23887e-07	5.82878e-07
FBgn0003486	spo	spook	200.727	-2.29495	0.4532	-5.06388	4.10814e-07	1.79639e-06
FBgn0003495	spz	spatzle	369.421	-0.680536	0.177009	-3.84465	0.000120726	0.000351398
FBgn0003525	stg	string	3243.42	-0.726475	0.163033	-4.456	8.35042e-06	2.96744e-05
FBgn0003527	stil	stand still	514.918	-1.97104	0.179127	-11.0036	3.67043e-28	1.56791e-26
FBgn0003545	sub	subito	570.289	-1.09643	0.141295	-7.75982	8.50468e-15	1.07069e-13
FBgn0003559	su(f)	suppressor of forked	1602.63	-0.26601	0.0769638	-3.4563	0.000547641	0.00140809
FBgn0003567	su(Hw)	suppressor of Hairy wing	2114.08	-0.462899	0.127327	-3.63553	0.000277414	0.000757629
FBgn0003598	Su(var)3-7	Suppressor of variegation 3-7	1677.09	-0.58266	0.127401	-4.57344	4.7978e-06	1.78056e-05
FBgn0003607	Su(var)205	Suppressor of variegation 205	5819.05	-0.754782	0.158698	-4.75609	1.97383e-06	7.80959e-06
FBgn0003612	Su(var)2-10	Suppressor of variegation 2-10	2750.1	-0.39056	0.121784	-3.20699	0.00134133	0.00318749
FBgn0003655	swa	swallow	2467.6	-2.11275	0.4301	-4.91225	9.00392e-07	3.75937e-06
FBgn0003676	CCT1	Chaperonin containing TCP1 subunit 1	14958	-0.568548	0.125255	-4.53913	5.64871e-06	2.06663e-05
FBgn0003701	thr	three rows	538.869	-0.565577	0.24422	-2.31585	0.0205666	0.0378629
FBgn0003710	tipE	temperature-induced paralytic E	39.3976	-0.897457	0.34118	-2.63045	0.00852723	0.0170959
FBgn0003714	tko	technical knockout	1326.01	-1.56722	0.231714	-6.7636	1.34603e-11	1.10063e-10
FBgn0003716	tkv	thickveins	2542.78	-0.408668	0.110049	-3.71351	0.000204403	0.000571074
FBgn0003733	tor	torso	513.81	-1.66047	0.223205	-7.43919	1.01305e-13	1.09413e-12
FBgn0003742	tra2	transformer 2	1216.35	-0.890027	0.139753	-6.36857	1.90803e-10	1.33014e-09
FBgn0003751	NA	NA	84.8984	-1.63295	0.412318	-3.96042	7.48182e-05	0.000226281
FBgn0003870	ttk	tramtrack	3925.34	-0.382731	0.121499	-3.15007	0.00163232	0.00381315
FBgn0003882	tub	tube	1328.24	-0.587472	0.0923261	-6.36302	1.97831e-10	1.37759e-09
FBgn0003941	RpL40	Ribosomal protein L40	36961.9	-0.573403	0.157581	-3.63879	0.000273921	0.000748584
FBgn0003942	RpS27A	Ribosomal protein S27A	51685.6	-0.719476	0.215116	-3.34459	0.000824039	0.00204956
FBgn0003950	unc	uncoordinated	130.27	-1.2657	0.42907	-2.94986	0.00317919	0.00700531
FBgn0003978	vls	valois	1246.86	-0.969488	0.153899	-6.2995	2.98599e-10	2.03045e-09
FBgn0004049	yrt	yurt	1624.34	-0.567092	0.142148	-3.98944	6.62302e-05	0.000202034
FBgn0004053	zen	zerknullt	48.7221	-1.96399	0.333015	-5.89759	3.68846e-09	2.15024e-08
FBgn0004066	Prosalpha4	Proteasome alpha4 subunit	5847.23	-0.423967	0.180632	-2.34713	0.0189185	0.0351158
FBgn0004087	Dhfr	Dihydrofolate reductase	677.522	-0.784112	0.256899	-3.05222	0.00227157	0.00513747
FBgn0004106	Cdk1	Cyclin-dependent kinase 1	2097.12	-1.32806	0.182377	-7.28197	3.28989e-13	3.33785e-12
FBgn0004107	Cdk2	Cyclin-dependent kinase 2	1120.38	-1.2916	0.118103	-10.9362	7.73872e-28	3.20626e-26
FBgn0004237	Hrb87F	Heterogeneous nuclear ribonucleoprotein at 87F	8580.48	-0.483459	0.175484	-2.75499	0.00586931	0.0121893
FBgn0004362	HmgD	High mobility group protein D	17984.5	-1.14697	0.154519	-7.42284	1.14638e-13	1.22743e-12
FBgn0004363	porin	porin	22024.8	-0.320644	0.0841564	-3.8101	0.00013891	0.000400375
FBgn0004367	mei-41	meiotic 41	807.206	-1.00829	0.203929	-4.94431	7.64143e-07	3.21106e-06
FBgn0004378	Klp61F	Kinesin-like protein at 61F	1381.12	-0.482547	0.195198	-2.47209	0.0134325	0.0257987
FBgn0004379	Klp67A	Kinesin-like protein at 67A	864.355	-0.760323	0.11483	-6.62127	3.56116e-11	2.7401e-10
FBgn0004390	RasGAP1	Ras GTPase activating protein 1	2358.3	-0.849818	0.139112	-6.10889	1.00325e-09	6.32163e-09
FBgn0004395	unk	unkempt	1184.28	-0.61502	0.167483	-3.67213	0.000240536	0.000664679
FBgn0004400	rhi	rhino	386.274	-2.07588	0.285485	-7.27142	3.55718e-13	3.58846e-12
FBgn0004406	tam	tamas	1017.15	-1.06366	0.157695	-6.74506	1.5296e-11	1.2401e-10
FBgn0004419	me31B	maternal expression at 31B	18817.1	-1.90466	0.314777	-6.05083	1.44099e-09	8.90107e-09
FBgn0004432	Cyp1	Cyclophilin 1	46103	-0.95563	0.177931	-5.37079	7.83932e-08	3.80987e-07
FBgn0004463	RpIII128	RNA polymerase III 128kD subunit	1878.82	-0.617335	0.116995	-5.27658	1.31615e-07	6.15961e-07
FBgn0004510	Ets97D	Ets at 97D	698.361	-0.537954	0.103973	-5.17397	2.29167e-07	1.03914e-06
FBgn0004556	Dbp73D	Dead box protein 73D	1537.83	-1.30988	0.16019	-8.17703	2.90936e-16	4.38458e-15
FBgn0004584	Rrp1	Recombination repair protein 1	2156.89	-0.638389	0.153376	-4.16223	3.15149e-05	0.000101775
FBgn0004587	B52	B52	12366	-0.548433	0.123115	-4.45466	8.40258e-06	2.98255e-05
FBgn0004597	CycC	Cyclin C	506.324	-0.346312	0.111544	-3.10471	0.00190463	0.00438315
FBgn0004598	Fur2	Furin 2	4727.62	-0.739608	0.182418	-4.05447	5.0248e-05	0.000156597
FBgn0004643	NA	NA	1456.18	-0.605527	0.111132	-5.44871	5.07361e-08	2.53435e-07
FBgn0004649	yl	yolkless	28611.9	-2.65089	0.526614	-5.03385	4.8073e-07	2.08227e-06
FBgn0004650	fs(1)N	female sterile (1) Nasrat	5886.44	-2.85805	0.369705	-7.73061	1.07036e-14	1.32596e-13
FBgn0004698	Xpc	Xeroderma pigmentosum, complementation group C	3198.36	-0.461402	0.144562	-3.19171	0.00141432	0.00334426
FBgn0004797	mdy	midway	638.678	-1.47495	0.233958	-6.30434	2.8943e-10	1.97111e-09
FBgn0004832	Xpac	Xeroderma pigmentosum group A-like	476.539	-0.308655	0.126331	-2.44323	0.0145564	0.0276996
FBgn0004837	Su(H)	Suppressor of Hairless	383.622	-0.846652	0.120913	-7.00215	2.5207e-12	2.291e-11
FBgn0004838	Hrb27C	Heterogeneous nuclear ribonucleoprotein at 27C	39693.4	-1.09582	0.172946	-6.33624	2.35441e-10	1.62487e-09
FBgn0004855	RpII15	RNA polymerase II 15kD subunit	934.137	-0.500883	0.107564	-4.65661	3.21463e-06	1.22909e-05
FBgn0004872	piwi	P-element induced wimpy testis	8799.75	-1.5131	0.127681	-11.8507	2.13486e-32	1.20761e-30
FBgn0004882	orb	oo18 RNA-binding protein	16044.7	-3.08798	0.316539	-9.75544	1.74837e-22	4.61297e-21
FBgn0004889	tws	twins	5265.35	-0.85055	0.101732	-8.3607	6.23478e-17	1.03396e-15
FBgn0004901	Prat	Phosphoribosylamidotransferase	3319.31	-1.30562	0.205842	-6.3428	2.25631e-10	1.56151e-09
FBgn0004913	Gnf1	Germ line transcription factor 1	2447.3	-0.790195	0.106219	-7.43929	1.01228e-13	1.09413e-12
FBgn0004924	Top1	Topoisomerase 1	8507.53	-0.965906	0.125874	-7.67358	1.67267e-14	2.03148e-13
FBgn0004926	eIF2beta	eukaryotic translation initiation factor 2 subunit beta	8646.32	-0.631799	0.159616	-3.95823	7.55065e-05	0.000228307
FBgn0004956	upd1	unpaired 1	88.224	-1.59044	0.420673	-3.7807	0.000156388	0.000447111
FBgn0005278	Sam-S	S-adenosylmethionine Synthetase	25796	-1.13093	0.129549	-8.72975	2.55235e-18	4.82726e-17
FBgn0005390	fs(1)M3	female sterile (1) M3	6578.99	-2.78603	0.365345	-7.62576	2.426e-14	2.9037e-13
FBgn0005411	U2af50	U2 small nuclear riboprotein auxiliary factor 50	3029.08	-0.439794	0.102301	-4.29904	1.71538e-05	5.79181e-05
FBgn0005427	ewg	erect wing	2361.94	-1.11741	0.100978	-11.0659	1.83649e-28	8.06752e-27
FBgn0005533	RpS17	Ribosomal protein S17	41510	-0.586549	0.212478	-2.76052	0.00577102	0.0120073
FBgn0005593	RpL7	Ribosomal protein L7	70793	-0.331677	0.132847	-2.49669	0.012536	0.0242158
FBgn0005596	yem	yemanuclein	1422.45	-1.01188	0.274099	-3.69165	0.000222803	0.000618196
FBgn0005613	Sox15	Sox box protein 15	10.3098	-2.9823	0.852706	-3.49745	0.000469729	0.00122476
FBgn0005617	msl-1	male-specific lethal 1	2167.99	-1.20375	0.141348	-8.51617	1.64916e-17	2.85732e-16
FBgn0005640	Eip63E	Ecdysone-induced protein 63E	1567.15	-0.358665	0.143964	-2.49135	0.0127259	0.0245138
FBgn0005642	wdn	wings down	1236.22	-0.545291	0.17129	-3.18343	0.00145539	0.00342894
FBgn0005648	Pabp2	Pabp2	5209.59	-1.02085	0.188167	-5.42521	5.78862e-08	2.86838e-07
FBgn0005654	Orc3	Origin recognition complex subunit 3	387.854	-0.705462	0.110459	-6.38663	1.69582e-10	1.18755e-09
FBgn0005655	PCNA	Proliferating cell nuclear antigen	4261.25	-0.926396	0.146758	-6.31242	2.74714e-10	1.87812e-09
FBgn0005674	GluProRS	Glutamyl-prolyl-tRNA synthetase	7510.46	-0.509099	0.14933	-3.40923	0.00065147	0.00165141
FBgn0005683	pie	pineapple eye	237.41	-0.801293	0.161012	-4.97662	6.47041e-07	2.74411e-06
FBgn0005694	Aef1	Adult enhancer factor 1	2787.96	-1.02668	0.123111	-8.33947	7.46266e-17	1.22609e-15
FBgn0005695	gcl	germ cell-less	1685.56	-1.15068	0.211111	-5.4506	5.02e-08	2.51061e-07
FBgn0005696	DNApol-alpha73	DNA polymerase alpha 73kD	814.432	-1.09913	0.141463	-7.76976	7.8634e-15	9.95013e-14
FBgn0005777	PpD3	Protein phosphatase D3	2597.07	-0.827241	0.136578	-6.05692	1.38749e-09	8.5898e-09
FBgn0010053	Jheh1	Juvenile hormone epoxide hydrolase 1	852.28	-0.75884	0.157889	-4.80617	1.53849e-06	6.19797e-06
FBgn0010078	RpL23	Ribosomal protein L23	62329.8	-0.733236	0.22304	-3.28746	0.00101095	0.00246188
FBgn0010097	gammaTub37C	gamma-Tubulin at 37C	675.873	-1.6502	0.355619	-4.64036	3.47798e-06	1.31799e-05
FBgn0010109	dpn	deadpan	22.3361	-1.94702	0.435784	-4.46786	7.90053e-06	2.81808e-05
FBgn0010173	RpA-70	Replication Protein A 70	4137.6	-0.71196	0.0806151	-8.83161	1.03182e-18	2.00978e-17
FBgn0010198	RpS15Aa	Ribosomal protein S15Aa	43489.1	-0.780875	0.220012	-3.54924	0.000386341	0.00102396
FBgn0010217	ATPsynbeta	ATP synthase, beta subunit	37481.1	-0.258584	0.0651511	-3.96899	7.21772e-05	0.000218989
FBgn0010220	Dbp45A	DEAD box protein 45A	1325.06	-0.761004	0.113942	-6.67885	2.40817e-11	1.88932e-10
FBgn0010222	Nmdmc	NAD-dependent methylenetetrahydrofolate dehydrogenase	2767.49	-0.367275	0.149725	-2.453	0.014167	0.0270334
FBgn0010247	Parp	Poly-(ADP-ribose) polymerase	2387.76	-0.711348	0.18644	-3.81542	0.000135953	0.000392585
FBgn0010265	RpS13	Ribosomal protein S13	45385.2	-0.374899	0.148803	-2.51943	0.0117547	0.0228526
FBgn0010278	Ssrp	Structure specific recognition protein	4817.31	-0.766041	0.113651	-6.74031	1.58049e-11	1.27801e-10
FBgn0010280	Taf4	TBP-associated factor 4	3794.73	-0.418452	0.145291	-2.8801	0.00397544	0.00857079
FBgn0010282	TfIIFalpha	Transcription factor IIFalpha	2728.84	-0.672826	0.12273	-5.48218	4.20111e-08	2.13467e-07
FBgn0010287	Trf	TBP-related factor	372.027	-0.63331	0.146328	-4.32802	1.50455e-05	5.12323e-05
FBgn0010292	bys	by S6	2579.96	-0.76562	0.0969351	-7.89827	2.82792e-15	3.79657e-14
FBgn0010300	brat	brain tumor	3924.23	-0.727335	0.120488	-6.0366	1.57393e-09	9.63808e-09
FBgn0010309	pigeon	pigeon	741.461	-0.673256	0.129735	-5.18947	2.10897e-07	9.59807e-07
FBgn0010314	Cks30A	Cyclin-dependent kinase subunit 30A	517.342	-0.907083	0.146019	-6.21209	5.22847e-10	3.43427e-09
FBgn0010315	CycD	Cyclin D	1447.02	-0.73029	0.0891304	-8.1935	2.53742e-16	3.84273e-15
FBgn0010316	dap	dacapo	1628.98	-1.24833	0.121032	-10.314	6.08937e-25	2.01698e-23
FBgn0010317	CycJ	Cyclin J	845.822	-2.30321	0.251074	-9.17344	4.58171e-20	1.00103e-18
FBgn0010339	128up	upstream of RpIII128	3445.56	-0.79351	0.118224	-6.71194	1.92055e-11	1.53594e-10
FBgn0010340	140up	upstream of RpII140	440.796	-0.409503	0.139745	-2.93037	0.00338562	0.00740967
FBgn0010342	Map60	Microtubule-associated protein 60	1141.82	-0.283653	0.102477	-2.76797	0.00564066	0.0117598
FBgn0010355	Taf1	TBP-associated factor 1	2819.05	-0.36822	0.15923	-2.31251	0.0207496	0.0381544
FBgn0010379	Akt1	Akt1	3304.44	-0.479223	0.147586	-3.24708	0.00116595	0.00280027
FBgn0010382	CycE	Cyclin E	1799.38	-1.31232	0.104588	-12.5475	4.10506e-36	3.10082e-34
FBgn0010398	Lrr47	Leucine-rich repeat 47	252.089	-0.512417	0.165169	-3.10238	0.00191974	0.004413
FBgn0010401	Os-C	Os-C	12.6376	-1.57918	0.508348	-3.1065	0.00189314	0.00435952
FBgn0010408	RpS9	Ribosomal protein S9	56269.2	-0.531368	0.207995	-2.55471	0.0106275	0.0208266
FBgn0010409	RpL18A	Ribosomal protein L18A	49339	-0.317614	0.12953	-2.45206	0.0142042	0.0270919
FBgn0010412	RpS19a	Ribosomal protein S19a	51071.7	-0.366575	0.156056	-2.349	0.0188239	0.0349715
FBgn0010416	TH1	TH1	1718.01	-0.46041	0.140483	-3.27733	0.00104794	0.00254396
FBgn0010421	TfIIFbeta	Transcription factor TFIIFbeta	694.242	-0.955717	0.352418	-2.71189	0.00669014	0.0137099
FBgn0010422	TfIIS	RNA polymerase II elongation factor	2086.93	-0.618541	0.0928852	-6.6592	2.75318e-11	2.14236e-10
FBgn0010431	mtrm	matrimony	1463.46	-2.08728	0.501251	-4.16414	3.12532e-05	0.000101061
FBgn0010438	mtSSB	mitochondrial single stranded DNA-binding protein	1920.24	-1.1128	0.189848	-5.86152	4.58658e-09	2.62684e-08
FBgn0010441	pll	pelle	676.857	-0.411059	0.0843808	-4.87147	1.1077e-06	4.54677e-06
FBgn0010488	NAT1	NAT1	18048.1	-0.389118	0.134813	-2.88636	0.0038973	0.00841551
FBgn0010501	Dcp-1	Death caspase-1	1853.63	-1.55987	0.189492	-8.23188	1.84305e-16	2.83977e-15
FBgn0010520	Bka	Bekka	980.155	-1.22166	0.23936	-5.10385	3.3282e-07	1.47671e-06
FBgn0010549	l(2)03659	lethal (2) 03659	800.172	-3.35268	0.388177	-8.63698	5.77174e-18	1.04993e-16
FBgn0010551	Phb2	Prohibitin 2	10820.6	-0.590222	0.107791	-5.47559	4.36051e-08	2.20662e-07
FBgn0010590	Prosbeta1	Proteasome beta1 subunit	4314.33	-0.363949	0.134006	-2.71593	0.00660901	0.013555
FBgn0010607	l(2)05714	lethal (2) 05714	567.911	-0.84932	0.200654	-4.23276	2.30836e-05	7.66442e-05
FBgn0010621	CCT5	Chaperonin containing TCP1 subunit 5	16059.8	-0.46649	0.152592	-3.05712	0.00223476	0.0050648
FBgn0010660	Nup214	Nucleoporin 214kD	3603.37	-0.825471	0.142447	-5.79493	6.83497e-09	3.8192e-08
FBgn0010741	Pfdn2	Prefoldin 2	3494.92	-0.692108	0.199013	-3.47771	0.000505722	0.00131202
FBgn0010750	atms	antimeros	1279.13	-0.315009	0.0867826	-3.62986	0.000283579	0.000772422
FBgn0010768	sqz	squeeze	545.642	-0.643534	0.144441	-4.45534	8.3761e-06	2.97401e-05
FBgn0010770	ppan	peter pan	2296.3	-1.01816	0.181851	-5.59885	2.15779e-08	1.13651e-07
FBgn0010774	Ref1	RNA and export factor binding protein 1	6390.63	-0.640097	0.1335	-4.79472	1.62898e-06	6.53281e-06
FBgn0010786	l(3)02640	lethal (3) 02640	3687.28	-0.88796	0.141649	-6.26874	3.63975e-10	2.44917e-09
FBgn0010803	TrpRS	Tryptophanyl-tRNA synthetase	1830.75	-0.666074	0.0974732	-6.8334	8.29245e-12	6.98822e-11
FBgn0010926	l(3)07882	lethal (3) 07882	3457.05	-1.10491	0.168245	-6.56725	5.12523e-11	3.87615e-10
FBgn0011020	Sas-4	Spindle assembly abnormal 4	565.591	-0.589984	0.165964	-3.55489	0.000378144	0.00100417
FBgn0011204	cue	cueball	5135.19	-0.834094	0.137703	-6.0572	1.38508e-09	8.57917e-09
FBgn0011207	pelo	pelota	1979.28	-0.636741	0.141047	-4.51438	6.35027e-06	2.3029e-05
FBgn0011217	eff	effete	15323.9	-0.512817	0.226218	-2.26692	0.0233953	0.0424833
FBgn0011224	heph	hephaestus	3445.87	-1.077	0.130953	-8.22431	1.9631e-16	3.00976e-15
FBgn0011236	ken	ken and barbie	1789.03	-0.43236	0.110004	-3.93042	8.47978e-05	0.000254291
FBgn0011284	RpS4	Ribosomal protein S4	63532.7	-0.408668	0.127444	-3.20665	0.00134292	0.00319066
FBgn0011291	Taf11	TBP-associated factor 11	406.2	-0.93422	0.151717	-6.15764	7.38373e-10	4.74182e-09
FBgn0011300	babo	baboon	3088.07	-0.648002	0.136287	-4.75469	1.98752e-06	7.85874e-06
FBgn0011327	Uch-L5	Ubiquitin carboxy-terminal hydrolase L5	2649.51	-0.694006	0.15358	-4.51886	6.21741e-06	2.25869e-05
FBgn0011335	vers	versatile	731.299	-0.652002	0.152235	-4.28287	1.84498e-05	6.20402e-05
FBgn0011474	PR-Set7	PR/SET domain containing protein 7	2560.56	-1.14189	0.129787	-8.79816	1.39073e-18	2.66693e-17
FBgn0011509	SrpRbeta	Signal recognition particle receptor beta	1061.12	-0.461765	0.153731	-3.00372	0.00266698	0.00595074
FBgn0011566	Smyd3	SET and MYND domain containing, class 3	469.524	-0.707806	0.129176	-5.47939	4.26792e-08	2.16595e-07
FBgn0011586	e(r)	enhancer of rudimentary	2233.67	-0.420177	0.171954	-2.44354	0.0145441	0.0276848
FBgn0011592	fra	frazzled	2765.92	-1.24411	0.22889	-5.43543	5.4664e-08	2.72178e-07
FBgn0011604	Iswi	Imitation SWI	3809.89	-0.691019	0.192796	-3.5842	0.000338115	0.000905637
FBgn0011606	Klp3A	Kinesin-like protein at 3A	1686.43	-1.29354	0.155959	-8.29408	1.09433e-16	1.74248e-15
FBgn0011638	La	La autoantigen-like	9584.37	-0.665975	0.194996	-3.41533	0.000637054	0.00162059
FBgn0011648	Mad	Mothers against dpp	1984.04	-0.651208	0.093428	-6.97016	3.16578e-12	2.82345e-11
FBgn0011659	Mlh1	Mlh1	436.03	-0.751367	0.122373	-6.13998	8.25303e-10	5.26189e-09
FBgn0011660	Pms2	Pms2	520.896	-0.613345	0.150199	-4.08354	4.43553e-05	0.000139886
FBgn0011674	insc	inscuteable	1136.6	-1.49949	0.329093	-4.55644	5.20276e-06	1.91707e-05
FBgn0011692	pav	pavarotti	2306.15	-1.25891	0.18146	-6.93767	3.98618e-12	3.51215e-11
FBgn0011703	RnrL	Ribonucleoside diphosphate reductase large subunit	3432.64	-0.781965	0.103606	-7.54747	4.43796e-14	5.05773e-13
FBgn0011704	RnrS	Ribonucleoside diphosphate reductase small subunit	4873.32	-1.08151	0.140623	-7.69083	1.46183e-14	1.78944e-13
FBgn0011705	rost	rolling stone	1582.17	-1.25782	0.214766	-5.85671	4.72136e-09	2.69655e-08
FBgn0011725	twin	twin	2942.44	-0.404991	0.120985	-3.34745	0.000815575	0.00203082
FBgn0011737	Wee1	Wee1 kinase	835.302	-0.287795	0.0864446	-3.32924	0.000870829	0.00215326
FBgn0011741	Arp6	Actin-related protein 6	1212.95	-0.316698	0.116983	-2.70721	0.00678503	0.0138788
FBgn0011742	Arp2	Actin-related protein 2	4492.05	-0.355891	0.109259	-3.2573	0.00112476	0.00271609
FBgn0011761	dhd	deadhead	18467.4	-2.4371	0.69037	-3.53014	0.000415347	0.00109359
FBgn0011762	DNApol-alpha50	DNA polymerase alpha 50kD	472.61	-1.19375	0.213935	-5.57994	2.406e-08	1.25868e-07
FBgn0011763	Dp	DP transcription factor	4797.22	-0.705271	0.0846815	-8.32851	8.18648e-17	1.33264e-15
FBgn0011766	E2f1	E2F transcription factor 1	4088.66	-0.302025	0.137359	-2.1988	0.0278923	0.0497596
FBgn0011769	Fdx1	Ferredoxin 1	375.04	-0.349555	0.142546	-2.45223	0.0141974	0.0270831
FBgn0011787	mRpL12	mitochondrial ribosomal protein L12	2578.5	-0.403426	0.163089	-2.47366	0.0133737	0.0256937
FBgn0011802	Gem3	Gemin3	797.637	-1.07496	0.174765	-6.15088	7.70551e-10	4.93567e-09
FBgn0011817	nmo	nemo	2101.73	-0.709971	0.201228	-3.52819	0.000418405	0.00110062
FBgn0011818	oaf	out at first	1783.71	-0.905876	0.164678	-5.50091	3.77841e-08	1.93497e-07
FBgn0011824	CG4038	uncharacterized protein	5782.97	-0.863596	0.189329	-4.56136	5.08243e-06	1.87608e-05
FBgn0011836	Taf2	TBP-associated factor 2	1305.28	-0.603921	0.126751	-4.76464	1.89188e-06	7.51094e-06
FBgn0011837	Tis11	Tis11 zinc finger protein	4420.43	-1.03607	0.161822	-6.40253	1.52821e-10	1.07688e-09
FBgn0012058	Cdc27	Cell division cycle 27	2100.89	-0.36578	0.0994994	-3.67621	0.000236725	0.000654586
FBgn0013263	Trl	Trithorax-like	4725.75	-0.726972	0.0769613	-9.44594	3.52241e-21	8.47295e-20
FBgn0013269	Fkbp39	FK506-binding protein 39kD	20768.3	-1.60615	0.201643	-7.9653	1.64827e-15	2.27634e-14
FBgn0013325	RpL11	Ribosomal protein L11	47243.8	-0.514178	0.187497	-2.74232	0.00610062	0.0126231
FBgn0013348	TpnC41C	Troponin C at 41C	33.2879	-2.912	1.2272	-2.37289	0.0176497	0.0329535
FBgn0013432	bcn92	bcn92	883.866	-0.831633	0.173195	-4.80171	1.57314e-06	6.32318e-06
FBgn0013435	Cdc2rk	Cdc2-related kinase	466.232	-0.574872	0.179459	-3.20337	0.00135831	0.00322351
FBgn0013469	klu	klumpfuss	392.261	-2.36039	0.378668	-6.23342	4.56367e-10	3.01519e-09
FBgn0013563	Pex1	Peroxin 1	559.567	-0.320914	0.0781602	-4.10585	4.02832e-05	0.000127792
FBgn0013732	sced	scrambled	1014.42	-0.967207	0.150229	-6.4382	1.20899e-10	8.62727e-10
FBgn0013746	alien	alien	2187.67	-0.709631	0.154426	-4.59528	4.32175e-06	1.61259e-05
FBgn0013765	cnn	centrosomin	2003.19	-0.493481	0.165216	-2.98688	0.00281836	0.00625809
FBgn0013773	Cyp6a22	Cyp6a22	817.769	-0.681109	0.188575	-3.61188	0.000303989	0.000822591
FBgn0013810	Dhc36C	Dynein heavy chain at 36C	522.794	-2.26439	0.318551	-7.1084	1.17395e-12	1.12041e-11
FBgn0013954	Fkbp12	FK506-binding protein 12kD	13167.2	-0.583772	0.196681	-2.96811	0.00299636	0.00663075
FBgn0014022	Rlb1	Rlb1	845.727	-1.07933	0.219817	-4.91012	9.10227e-07	3.7966e-06
FBgn0014023	mRpL47	mitochondrial ribosomal protein L47	1471.92	-0.754264	0.168732	-4.47019	7.81497e-06	2.78916e-05
FBgn0014024	Rnp4F	RNA-binding protein 4F	2960.67	-0.83518	0.0837111	-9.97694	1.92316e-23	5.7132e-22
FBgn0014032	Sptr	Sepiapterin reductase	643.735	-0.39603	0.170111	-2.32807	0.0199083	0.0367822
FBgn0014037	Su(Tpl)	Su(Tpl)	3456.07	-0.450286	0.140163	-3.21259	0.00131542	0.00312892
FBgn0014075	Uggt	UDP-glucose-glycoprotein glucosyltransferase	3540.69	-0.431334	0.157757	-2.73417	0.00625377	0.0129034
FBgn0014092	CG4278	uncharacterized protein	1190.55	-1.07624	0.146519	-7.34537	2.05196e-13	2.13799e-12
FBgn0014189	Hel25E	Helicase at 25E	9531.27	-0.960891	0.122536	-7.84168	4.44559e-15	5.79095e-14
FBgn0014269	prod	proliferation disrupter	945.592	-0.210067	0.0915543	-2.29445	0.0217644	0.0398254
FBgn0014340	mof	males absent on the first	578.11	-0.469643	0.170167	-2.75989	0.00578202	0.0120241
FBgn0014366	noi	noisette	1632.91	-0.625827	0.122475	-5.10984	3.22439e-07	1.43322e-06
FBgn0014368	nol	no optic lobe	10.4331	-1.34779	0.519711	-2.59334	0.00950499	0.0188366
FBgn0014417	CG13397	uncharacterized protein	866.217	-1.38859	0.198582	-6.99253	2.69973e-12	2.4394e-11
FBgn0014455	Ahcy	Adenosylhomocysteinase	16252.9	-0.683824	0.190111	-3.59698	0.000321934	0.000866418
FBgn0014861	Mcm2	Minichromosome maintenance 2	2944.14	-1.19635	0.148958	-8.0315	9.62858e-16	1.36475e-14
FBgn0014877	Roe1	Roe1	2218.55	-0.860054	0.103193	-8.3344	7.78949e-17	1.27304e-15
FBgn0014879	Set	Set	5867.11	-1.06315	0.134295	-7.91655	2.44197e-15	3.32431e-14
FBgn0014931	CG2678	uncharacterized protein	1035.55	-1.58971	0.192017	-8.27897	1.24242e-16	1.95567e-15
FBgn0014949	btn	buttonless	14.3462	-1.36352	0.544335	-2.50493	0.0122477	0.0237143
FBgn0015218	eIF4E1	eukaryotic translation initiation factor 4E1	11368	-0.335964	0.121926	-2.75548	0.00586062	0.0121733
FBgn0015229	glec	gliolectin	2790.82	-0.822008	0.161602	-5.08662	3.64507e-07	1.60694e-06
FBgn0015240	Hr96	Hormone receptor-like in 96	1032.3	-0.710666	0.130187	-5.45881	4.79348e-08	2.41095e-07
FBgn0015268	Nap1	Nucleosome assembly protein 1	29330.7	-0.930269	0.177901	-5.22914	1.70303e-07	7.8662e-07
FBgn0015270	Orc2	Origin recognition complex subunit 2	392.119	-0.886645	0.121234	-7.31353	2.6022e-13	2.68858e-12
FBgn0015271	Orc5	Origin recognition complex subunit 5	373.245	-0.562944	0.113231	-4.97163	6.63939e-07	2.81e-06
FBgn0015278	Pi3K68D	Phosphotidylinositol 3 kinase 68D	2183.66	-0.525908	0.168965	-3.11252	0.00185499	0.00428405
FBgn0015298	Srp19	Signal recognition particle protein 19	1228.53	-0.732227	0.186222	-3.93202	8.42361e-05	0.000252729
FBgn0015299	Ssb-c31a	Single stranded-binding protein c31A	1405.29	-1.0312	0.229665	-4.49002	7.12161e-06	2.5594e-05
FBgn0015321	Ubc4	Ubiquitin conjugating enzyme 4	3770.37	-0.71384	0.131772	-5.41724	6.05275e-08	2.99327e-07
FBgn0015338	CG5861	uncharacterized protein	1258.96	-0.531197	0.190929	-2.78217	0.00539965	0.0113087
FBgn0015359	CG2034	uncharacterized protein	1499.72	-0.854525	0.14586	-5.85854	4.66955e-09	2.66942e-08
FBgn0015360	oxt	peptide O-xylosyltransferase	1469.74	-0.516248	0.204623	-2.52293	0.0116383	0.022637
FBgn0015371	chn	charlatan	1146.89	-0.896868	0.340811	-2.63157	0.00849924	0.0170563
FBgn0015376	cutlet	cutlet	545.356	-0.78466	0.105045	-7.46973	8.0358e-14	8.83297e-13
FBgn0015391	glu	gluon	2138.82	-0.881428	0.216585	-4.06967	4.70803e-05	0.000147541
FBgn0015396	jumu	jumeau	2415.77	-0.436316	0.145475	-2.99924	0.00270654	0.00603299
FBgn0015399	kek1	kekkon 1	1366.53	-1.47562	0.287915	-5.1252	2.97217e-07	1.32722e-06
FBgn0015519	nAChRalpha3	nicotinic Acetylcholine Receptor alpha3	115.124	-1.07947	0.373893	-2.8871	0.00388813	0.00839862
FBgn0015520	nonA-l	nonA-like	860.805	-0.8512	0.1225	-6.94855	3.6905e-12	3.26091e-11
FBgn0015521	RpS21	Ribosomal protein S21	36357.1	-0.811071	0.31727	-2.55641	0.0105759	0.0207433
FBgn0015522	olf186-M	olf186-M	1191.18	-0.865597	0.363174	-2.38343	0.0171524	0.0320972
FBgn0015527	peng	penguin	6368.42	-0.877345	0.201058	-4.36364	1.27917e-05	4.41035e-05
FBgn0015544	spag	spaghetti	716.287	-0.459435	0.121862	-3.77014	0.000163158	0.000465072
FBgn0015546	spel1	spellchecker1	1054.5	-0.590641	0.143285	-4.12214	3.7537e-05	0.000119632
FBgn0015553	tos	tosca	832.179	-1.7401	0.262868	-6.61966	3.60015e-11	2.76495e-10
FBgn0015558	tty	tweety	266.633	-1.40225	0.317635	-4.41466	1.01168e-05	3.5403e-05
FBgn0015561	unpg	unplugged	8.14918	-3.91953	1.68762	-2.32252	0.0202047	0.0372741
FBgn0015568	alpha-Est1	alpha-Esterase-1	1093.18	-0.9328	0.269279	-3.46406	0.000532088	0.0013718
FBgn0015602	BEAF-32	Boundary element-associated factor of 32kD	1292.85	-0.498949	0.187517	-2.66083	0.00779493	0.0157603
FBgn0015609	CadN	Cadherin-N	1405.8	-1.24197	0.298702	-4.15788	3.21218e-05	0.000103653
FBgn0015615	SMC3	Structural maintenance of chromosomes 3	1865.18	-0.413488	0.124825	-3.31254	0.000924542	0.00226796
FBgn0015618	Cdk8	Cyclin-dependent kinase 8	215.081	-0.464054	0.1136	-4.08499	4.4078e-05	0.000139082
FBgn0015621	Clp	Clipper	569.71	-0.590743	0.153571	-3.84672	0.00011971	0.000348606
FBgn0015625	CycB3	Cyclin B3	1523.45	-1.14334	0.115646	-9.88652	4.76298e-23	1.34712e-21
FBgn0015664	Dref	DNA replication-related element factor	2110.64	-0.531946	0.0819611	-6.49022	8.57102e-11	6.26418e-10
FBgn0015737	Hmu	Hemomucin	4519.63	-0.612629	0.141329	-4.33476	1.45918e-05	4.98106e-05
FBgn0015756	RpL9	Ribosomal protein L9	48332.2	-0.571892	0.177133	-3.22859	0.00124402	0.00297048
FBgn0015778	rin	rasputin	25651.4	-1.27247	0.169942	-7.48765	7.01177e-14	7.79029e-13
FBgn0015805	HDAC1	Histone deacetylase 1	4970.39	-0.539657	0.102418	-5.26917	1.37045e-07	6.39921e-07
FBgn0015818	Spx	Spliceosomal protein on the X	1241.13	-0.598862	0.135306	-4.42599	9.60013e-06	3.36997e-05
FBgn0015828	TfIIEalpha	Transcription factor IIEalpha	1604.94	-0.695223	0.165195	-4.2085	2.57071e-05	8.46066e-05
FBgn0015829	TfIIEbeta	Transcription factor IIEbeta	495.604	-0.462395	0.171226	-2.70049	0.00692378	0.0141293
FBgn0015834	eIF3i	eukaryotic translation initiation factor 3 subunit i	8327.06	-0.751452	0.101095	-7.43312	1.06065e-13	1.14355e-12
FBgn0015838	Vang	Van Gogh	2527.1	-0.671111	0.111306	-6.02942	1.64549e-09	1.00366e-08
FBgn0015905	ast	asteroid	970.143	-0.665046	0.139413	-4.77033	1.83928e-06	7.32637e-06
FBgn0015925	csul	capsuleen	1164.45	-0.954687	0.0953221	-10.0154	1.30452e-23	3.9706e-22
FBgn0015926	dah	discontinuous actin hexagon	325.731	-0.862975	0.182154	-4.7376	2.16264e-06	8.51313e-06
FBgn0015929	dpa	disc proliferation abnormal	3340.56	-0.980935	0.132854	-7.38355	1.54126e-13	1.63329e-12
FBgn0015949	hrg	hiiragi	3206.5	-0.491513	0.148071	-3.31944	0.000901981	0.00222152
FBgn0016034	mael	maelstrom	1840.33	-1.10931	0.164984	-6.72376	1.77099e-11	1.42368e-10
FBgn0016041	Tom40	Translocase of outer membrane 40	6896.13	-0.937116	0.118569	-7.90356	2.71056e-15	3.65778e-14
FBgn0016053	pgc	polar granule component	1843.46	-2.64218	0.441868	-5.97958	2.23713e-09	1.34532e-08
FBgn0016054	phr6-4	(6-4)-photolyase	826.321	-1.29558	0.504574	-2.56768	0.0102383	0.0201528
FBgn0016070	smg	smaug	9179.98	-2.16606	0.230734	-9.38768	6.13342e-21	1.43903e-19
FBgn0016131	Cdk4	Cyclin-dependent kinase 4	2172.19	-1.04055	0.111107	-9.36529	7.58405e-21	1.766e-19
FBgn0016660	H15	H15	65.142	-3.09316	0.484351	-6.3862	1.70057e-10	1.19021e-09
FBgn0016685	Nlp	Nucleoplasmin	17862.9	-1.22554	0.159243	-7.69603	1.40355e-14	1.7215e-13
FBgn0016687	Nurf-38	Nucleosome remodeling factor - 38kD	7725.92	-0.484158	0.161919	-2.99012	0.00278865	0.00620212
FBgn0016726	RpL29	Ribosomal protein L29	33811.3	-1.09864	0.322211	-3.40968	0.00065038	0.00164999
FBgn0016794	dos	daughter of sevenless	1814.59	-0.82921	0.195443	-4.24271	2.20832e-05	7.34013e-05
FBgn0016919	nompB	no mechanoreceptor potential B	24.9	-1.62531	0.446506	-3.64007	0.000272565	0.000745536
FBgn0016970	l(2)k10201	lethal (2) k10201	322.903	-0.953596	0.225522	-4.2284	2.35355e-05	7.80193e-05
FBgn0016974	NA	NA	117.226	-2.10048	0.544651	-3.85656	0.000114992	0.000335973
FBgn0016983	smid	smallminded	7560.85	-1.01694	0.123419	-8.23972	1.72615e-16	2.66636e-15
FBgn0017429	CG5989	uncharacterized protein	1362.98	-0.786029	0.139807	-5.62223	1.88513e-08	9.98416e-08
FBgn0017430	Nelf-E	Negative elongation factor E	652.589	-0.819055	0.122985	-6.6598	2.74201e-11	2.13635e-10
FBgn0017457	U2af38	U2 small nuclear riboprotein auxiliary factor 38	1463.85	-0.389496	0.114201	-3.41061	0.000648184	0.00164509
FBgn0017545	RpS3A	Ribosomal protein S3A	76096.4	-0.969848	0.184447	-5.25814	1.45519e-07	6.77704e-07
FBgn0017551	Rca1	Regulator of cyclin A1	428.186	-0.434635	0.161293	-2.69469	0.0070454	0.0143574
FBgn0017561	Ork1	Open rectifier K[+] channel 1	1610.9	-1.19045	0.447645	-2.65936	0.00782898	0.0158214
FBgn0017577	Mcm5	Minichromosome maintenance 5	2499.05	-1.0684	0.115353	-9.26203	2.00576e-20	4.5177e-19
FBgn0017578	Max	Max	895.859	-0.3331	0.124526	-2.67495	0.0074741	0.0151562
FBgn0017579	RpL14	Ribosomal protein L14	52418.7	-0.661739	0.161169	-4.10587	4.02791e-05	0.000127792
FBgn0017581	Lk6	Lk6 kinase	18806.6	-0.428275	0.168	-2.54925	0.0107953	0.0211031
FBgn0019686	lok	loki	3396.04	-1.53889	0.178894	-8.60225	7.81715e-18	1.39537e-16
FBgn0019936	RpS20	Ribosomal protein S20	34612.3	-0.805597	0.172336	-4.67458	2.94555e-06	1.13427e-05
FBgn0019938	NA	NA	7461.91	-1.38109	0.169321	-8.1566	3.44575e-16	5.15531e-15
FBgn0019985	mGluR	metabotropic Glutamate Receptor	69.6263	-1.47764	0.268837	-5.49639	3.87636e-08	1.98267e-07
FBgn0019990	Gcn2	Gcn2	1571.24	-0.438327	0.150007	-2.92204	0.00347747	0.00759233
FBgn0020018	Ppox	Protoporphyrinogen oxidase	622.507	-0.363953	0.131777	-2.76188	0.00574696	0.0119653
FBgn0020224	Cbl	Cbl proto-oncogene	2015.5	-0.432775	0.102976	-4.20267	2.6379e-05	8.65879e-05
FBgn0020248	stet	stem cell tumor	2208.85	-2.46713	0.38211	-6.45662	1.07071e-10	7.71883e-10
FBgn0020255	Ran	Ran	22854	-0.959944	0.153746	-6.24369	4.27373e-10	2.84334e-09
FBgn0020272	mst	misato	851.57	-0.73892	0.147632	-5.00515	5.58187e-07	2.38854e-06
FBgn0020305	dbe	dribble	1757.71	-0.763186	0.179077	-4.26177	2.02817e-05	6.77404e-05
FBgn0020306	dom	domino	19349.7	-1.063	0.223716	-4.75158	2.01838e-06	7.97565e-06
FBgn0020370	TppII	tripeptidyl-peptidase II	6604.93	-0.645549	0.173334	-3.72431	0.000195848	0.000549278
FBgn0020386	Pdk1	Phosphoinositide-dependent kinase 1	2597.6	-0.707427	0.0920525	-7.68504	1.52954e-14	1.86679e-13
FBgn0020392	Nmt	N-myristoyl transferase	3889.71	-0.763334	0.133921	-5.69989	1.19887e-08	6.49107e-08
FBgn0020407	asun	asunder	495.25	-0.717646	0.121885	-5.88788	3.91188e-09	2.27131e-08
FBgn0020412	JIL-1	JIL-1 kinase	4549.92	-1.13684	0.139667	-8.13967	3.96343e-16	5.89423e-15
FBgn0020443	eRF3	eukaryotic translation release factor 3	14078.8	-0.887133	0.129513	-6.84978	7.39653e-12	6.27161e-11
FBgn0020445	E23	Early gene at 23	1776.33	-1.37826	0.145064	-9.50107	2.07747e-21	5.13688e-20
FBgn0020497	emb	embargoed	7526.7	-0.594865	0.136756	-4.34984	1.36237e-05	4.67929e-05
FBgn0020513	Paics	PAICS bifunctional enzyme	5455.92	-0.906153	0.218348	-4.15004	3.32422e-05	0.000106907
FBgn0020616	SA	Stromalin	1239.35	-0.481855	0.173183	-2.78234	0.00539678	0.0113046
FBgn0020633	Mcm7	Minichromosome maintenance 7	2661.65	-0.844748	0.1102	-7.66561	1.77989e-14	2.15325e-13
FBgn0020660	eIF4B	eukaryotic translation initiation factor 4B	6107.91	-0.476828	0.101729	-4.68722	2.76935e-06	1.07376e-05
FBgn0020887	Su(z)12	Su(z)12	2349.26	-0.508544	0.120342	-4.22583	2.38063e-05	7.87905e-05
FBgn0020908	Scp1	Sarcoplasmic calcium-binding protein 1	137.652	-4.1627	1.45886	-2.8534	0.00432539	0.00925119
FBgn0020909	Rtc1	Rtc1	1377.32	-0.932013	0.167395	-5.56774	2.58066e-08	1.34721e-07
FBgn0020910	RpL3	Ribosomal protein L3	104621	-0.423197	0.120782	-3.50382	0.000458639	0.00119689
FBgn0021750	SerRS-m	Seryl-tRNA synthetase, mitochondrial	634.875	-0.458968	0.111522	-4.11548	3.86379e-05	0.00012295
FBgn0021761	Nup154	Nucleoporin 154kD	3935.11	-1.05169	0.167241	-6.28849	3.20562e-10	2.17001e-09
FBgn0021764	sdk	sidekick	4719.53	-1.07029	0.198049	-5.40413	6.51221e-08	3.20641e-07
FBgn0021768	nudC	nudC	3812.15	-1.05639	0.192922	-5.47574	4.3569e-08	2.20569e-07
FBgn0021800	Reph	Regulator of eph expression	4543.6	-1.67585	0.213398	-7.85319	4.05588e-15	5.31685e-14
FBgn0021856	l(2)k14505	lethal (2) k14505	828.748	-0.263306	0.115651	-2.27673	0.0228023	0.0415099
FBgn0021874	Nle	Notchless	2131.78	-0.638302	0.162149	-3.93652	8.26732e-05	0.00024828
FBgn0021875	Zfrp8	Zinc finger protein RP-8	979.651	-0.534168	0.171698	-3.1111	0.00186394	0.00430231
FBgn0021895	ytr	yantar	3844.89	-0.624827	0.111827	-5.58746	2.30411e-08	1.20895e-07
FBgn0021995	Rs1	Rs1	4957.14	-1.05344	0.209822	-5.02062	5.15052e-07	2.21698e-06
FBgn0022023	eIF3h	eukaryotic translation initiation factor 3 subunit h	8608.47	-0.397717	0.120434	-3.30236	0.000958746	0.00234398
FBgn0022029	l(2)k01209	lethal (2) k01209	2752.12	-0.863145	0.115935	-7.4451	9.68747e-14	1.05086e-12
FBgn0022069	Nnp-1	Nnp-1	6171.04	-1.06725	0.157169	-6.79047	1.11771e-11	9.22465e-11
FBgn0022213	NA	NA	3701.54	-0.427824	0.104749	-4.08429	4.42123e-05	0.000139471
FBgn0022238	lolal	lola like	4225.45	-0.726214	0.14593	-4.97645	6.47626e-07	2.74565e-06
FBgn0022288	l(2)09851	lethal (2) 09851	3684.2	-0.923514	0.187945	-4.91375	8.93526e-07	3.73448e-06
FBgn0022338	dnk	deoxyribonucleoside kinase	1844.1	-0.9143	0.133962	-6.82509	8.78708e-12	7.36498e-11
FBgn0022343	CG3760	uncharacterized protein	6023.18	-0.538831	0.146214	-3.68522	0.000228503	0.000633124
FBgn0022344	CG10340	uncharacterized protein	1755.35	-0.39751	0.135904	-2.92493	0.00344539	0.0075276
FBgn0022349	CG1910	uncharacterized protein	8908.1	-0.767484	0.149362	-5.13843	2.77045e-07	1.24304e-06
FBgn0022724	Taf8	TBP-associated factor 8	366.554	-0.259512	0.0941069	-2.75763	0.00582217	0.0120975
FBgn0022764	Sin3A	Sin3A	8767.33	-0.671379	0.168254	-3.99028	6.59958e-05	0.000201369
FBgn0022786	Hira	hira	806.188	-0.80678	0.129659	-6.22231	4.899e-10	3.22813e-09
FBgn0022893	Df31	Decondensation factor 31	32874.4	-0.764223	0.150435	-5.0801	3.77244e-07	1.66014e-06
FBgn0022936	CycH	Cyclin H	609.389	-0.435918	0.157221	-2.77265	0.00556021	0.0116077
FBgn0022942	Cbp80	cap binding protein 80	3211.6	-0.467902	0.0979395	-4.77746	1.77527e-06	7.08052e-06
FBgn0022943	Cbp20	cap binding protein 20	773.431	-0.583885	0.188606	-3.09579	0.00196288	0.00450132
FBgn0022981	rpk	ripped pocket	2279.84	-2.33977	0.414753	-5.64134	1.68728e-08	9.00171e-08
FBgn0022986	qkr58E-1	quaking related 58E-1	978.476	-0.367599	0.124699	-2.9479	0.00319944	0.00704492
FBgn0022987	qkr54B	quaking related 54B	1186.17	-0.654815	0.142496	-4.59532	4.3209e-06	1.61259e-05
FBgn0023143	Uba1	Ubiquitin activating enzyme 1	18969.4	-0.248057	0.0969811	-2.55779	0.010534	0.0206741
FBgn0023167	SmD3	Small ribonucleoprotein particle protein SmD3	3158.42	-0.327266	0.145532	-2.24875	0.0245282	0.044339
FBgn0023174	Prosbeta2	Proteasome beta2 subunit	4469.27	-0.389295	0.129233	-3.01234	0.00259241	0.00579481
FBgn0023175	Prosalpha7	Proteasome alpha7 subunit	4627.6	-0.426487	0.128317	-3.3237	0.000888329	0.00219259
FBgn0023180	Orc6	Origin recognition complex subunit 6	191.663	-0.590583	0.208396	-2.83395	0.00459771	0.00977624
FBgn0023181	Orc4	Origin recognition complex subunit 4	506.1	-0.577314	0.115894	-4.98139	6.31281e-07	2.68186e-06
FBgn0023213	eIF4G1	eukaryotic translation initiation factor 4G1	17829.5	-0.656482	0.148977	-4.40659	1.05011e-05	3.65723e-05
FBgn0023215	Mnt	Mnt	2321.25	-1.37406	0.236689	-5.80534	6.4237e-09	3.61056e-08
FBgn0023216	Parg	Poly(ADP-ribose) glycohydrolase	831.235	-0.776763	0.138507	-5.60811	2.04546e-08	1.08102e-07
FBgn0023395	Chd3	Chd3	635.977	-0.8345	0.167418	-4.98452	6.21161e-07	2.64159e-06
FBgn0023407	B4	B4	2259.98	-0.413828	0.176703	-2.34194	0.0191838	0.0355708
FBgn0023416	Ac3	Adenylate cyclase 3	52.6693	-1.22065	0.367459	-3.32186	0.000894204	0.0022049
FBgn0023509	mip130	Myb-interacting protein 130	1825.33	-0.470405	0.157427	-2.98808	0.00280732	0.00623692
FBgn0023511	Edem1	ER degradation enhancer, mannosidase alpha-like 1	1170.8	-0.756109	0.132312	-5.7146	1.09963e-08	5.97467e-08
FBgn0023512	eIF2Bepsilon	eukaryotic translation initiation factor 2B subunit epsilon	2218.35	-0.675586	0.136268	-4.95778	7.13016e-07	3.00539e-06
FBgn0023513	CG14803	uncharacterized protein	879.984	-0.523308	0.149911	-3.49079	0.000481591	0.00125388
FBgn0023514	CG14805	uncharacterized protein	2074.74	-0.647641	0.124757	-5.1912	2.08938e-07	9.5159e-07
FBgn0023515	CG14814	uncharacterized protein	2083.06	-1.67604	0.202502	-8.27668	1.26654e-16	1.98858e-15
FBgn0023517	Pgam5	Phosphoglycerate mutase 5	1595.77	-0.713502	0.174777	-4.08235	4.45829e-05	0.000140425
FBgn0023521	CG3587	uncharacterized protein	551.282	-0.775625	0.145456	-5.33237	9.69375e-08	4.63653e-07
FBgn0023522	CG11596	uncharacterized protein	3588.29	-1.49406	0.177187	-8.43207	3.39602e-17	5.74725e-16
FBgn0023527	CG3071	uncharacterized protein	2530.27	-0.96906	0.188919	-5.1295	2.90519e-07	1.30114e-06
FBgn0023528	CG2924	uncharacterized protein	2696.86	-0.510304	0.119879	-4.25682	2.07353e-05	6.91249e-05
FBgn0023536	CG3156	uncharacterized protein	694.216	-0.217713	0.08035	-2.70955	0.00673737	0.0137948
FBgn0023542	Nmd3	Nonsense-mediated mRNA 3	2818.08	-0.944516	0.152895	-6.17755	6.51059e-10	4.22268e-09
FBgn0024177	zpg	zero population growth	4451.01	-2.29007	0.308196	-7.43057	1.08135e-13	1.16484e-12
FBgn0024182	waw	waclaw	1248.73	-1.15736	0.173773	-6.6602	2.73464e-11	2.13195e-10
FBgn0024188	san	separation anxiety	2018.39	-0.975108	0.166674	-5.8504	4.9038e-09	2.79219e-08
FBgn0024194	rasp	rasp	1191.33	-0.926954	0.272916	-3.39648	0.000682589	0.00172288
FBgn0024227	aurB	aurora B	662.397	-0.53949	0.142994	-3.77281	0.000161417	0.000460427
FBgn0024230	Hs2st	Heparan sulfate 2-O-sulfotransferase	529.509	-0.271681	0.0935675	-2.90358	0.00368919	0.0080038
FBgn0024236	foi	fear-of-intimacy	5686.25	-0.808608	0.146078	-5.53544	3.10445e-08	1.6071e-07
FBgn0024250	brk	brinker	408.952	-0.526841	0.149338	-3.52784	0.00041896	0.00110146
FBgn0024251	bbx	bobby sox	2135.64	-0.331057	0.137112	-2.4145	0.015757	0.0298012
FBgn0024285	Srp54	Srp54	2617.66	-0.462813	0.119669	-3.86743	0.000109987	0.000322795
FBgn0024329	Mekk1	Mekk1	2761.32	-0.4467	0.151245	-2.95348	0.00314216	0.00692863
FBgn0024330	MED6	Mediator complex subunit 6	619.706	-0.451355	0.114367	-3.94654	7.92898e-05	0.000238756
FBgn0024352	Stip1	Stress induced phosphoprotein 1	9280.35	-0.718924	0.0834071	-8.61946	6.72709e-18	1.20951e-16
FBgn0024360	MTPAP	mitochondrial poly(A) polymerase	1022.55	-0.607122	0.260772	-2.32817	0.0199029	0.0367776
FBgn0024362	Naa30A	N(alpha)-acetyltransferase 30 A	3178.75	-0.395666	0.13112	-3.01759	0.00254792	0.00570256
FBgn0024364	CG11417	uncharacterized protein	3212.52	-1.18627	0.261003	-4.54505	5.49228e-06	2.01416e-05
FBgn0024371	E2f2	E2F transcription factor 2	931.774	-0.848548	0.104262	-8.13861	3.99831e-16	5.93897e-15
FBgn0024491	Bin1	Bicoid interacting protein 1	1069.8	-0.598991	0.210684	-2.84308	0.004468	0.00952988
FBgn0024510	dlt	discs lost	473.807	-0.561851	0.15708	-3.57684	0.000347779	0.000929912
FBgn0024542	Neos	Neosin	537.709	-0.432308	0.148034	-2.92034	0.00349648	0.00763069
FBgn0024556	mEFTu1	mitochondrial translation elongation factor Tu 1	8259.68	-0.362385	0.15603	-2.32253	0.0202044	0.0372741
FBgn0024558	Dph5	Diphthamide methyltransferase	3937.36	-1.07602	0.176644	-6.09148	1.11871e-09	6.99931e-09
FBgn0024698	Cpsf160	Cleavage and polyadenylation specificity factor 160	1828.4	-0.891485	0.131931	-6.75722	1.40667e-11	1.14643e-10
FBgn0024732	Drep1	DNA fragmentation factor-related protein 1	1417.21	-0.362561	0.132289	-2.74067	0.00613147	0.0126738
FBgn0024733	RpL10	Ribosomal protein L10	73778.1	-0.668598	0.229314	-2.91565	0.00354952	0.00773329
FBgn0024887	kin17	kin17	578.974	-0.3104	0.12707	-2.44275	0.0145757	0.0277321
FBgn0024889	Kap-alpha1	karyopherin alpha1	3090.42	-0.553984	0.110122	-5.03065	4.88832e-07	2.11367e-06
FBgn0024909	Taf7	TBP-associated factor 7	393.71	-0.723448	0.161421	-4.48175	7.40331e-06	2.65371e-05
FBgn0024913	Actbeta	Activin-beta	8.6981	-1.57356	0.710133	-2.21587	0.0267006	0.0478679
FBgn0024920	Ts	Thymidylate synthase	1399.74	-0.838579	0.181937	-4.60917	4.04272e-06	1.51853e-05
FBgn0024921	Tnpo	Transportin	3814.66	-0.576872	0.163301	-3.53257	0.000411535	0.00108401
FBgn0024956	Mat1	Menage a trois 1	798.26	-0.563873	0.140238	-4.02084	5.7991e-05	0.000178838
FBgn0024958	Irp-1A	Iron regulatory protein 1A	2411.14	-0.449981	0.119938	-3.7518	0.000175573	0.000496801
FBgn0024975	CG2712	uncharacterized protein	255.875	-0.756964	0.137916	-5.48857	4.05201e-08	2.06484e-07
FBgn0024984	CG3457	uncharacterized protein	321.905	-2.24177	0.368214	-6.08823	1.14163e-09	7.13546e-09
FBgn0024991	CG2694	uncharacterized protein	639.53	-0.585409	0.101887	-5.74567	9.15577e-09	5.0231e-08
FBgn0024993	CG2662	uncharacterized protein	290.224	-0.751601	0.128006	-5.87161	4.31586e-09	2.48441e-08
FBgn0024998	CG2685	uncharacterized protein	940.211	-0.388692	0.145024	-2.68019	0.00735795	0.0149378
FBgn0025185	az2	az2	220.575	-0.53017	0.157958	-3.3564	0.000789654	0.00197143
FBgn0025336	CG4882	uncharacterized protein	1711.08	-0.434049	0.130741	-3.31992	0.000900426	0.00221891
FBgn0025355	SuUR	Suppressor of Under-Replication	488.714	-0.926547	0.141861	-6.53135	6.51776e-11	4.84937e-10
FBgn0025366	Ip259	Intronic Protein 259	7415.97	-0.763102	0.110822	-6.88581	5.74592e-12	4.9707e-11
FBgn0025388	CG12179	uncharacterized protein	472.06	-0.571969	0.17251	-3.31557	0.00091457	0.00224706
FBgn0025394	inc	insomniac	3236.4	-0.539036	0.0873945	-6.16785	6.92259e-10	4.46884e-09
FBgn0025455	CycT	Cyclin T	3947.08	-0.489491	0.214821	-2.2786	0.0226909	0.0413193
FBgn0025457	Bub3	Bub3	1903.83	-0.560384	0.0994996	-5.63202	1.78113e-08	9.47794e-08
FBgn0025549	unc-119	unc-119	1003.7	-0.567238	0.145303	-3.90382	9.46859e-05	0.000281355
FBgn0025574	Pli	Pellino	1886.68	-0.277057	0.111049	-2.49491	0.012599	0.0243147
FBgn0025582	eIF3e	eukaryotic translation initiation factor 3 subunit e	9241.8	-0.499412	0.116151	-4.29967	1.71054e-05	5.77705e-05
FBgn0025626	CG4281	uncharacterized protein	1761.48	-0.40205	0.0881991	-4.55844	5.15341e-06	1.90001e-05
FBgn0025629	CG4045	uncharacterized protein	1378.27	-0.655159	0.183289	-3.57447	0.000350942	0.00093762
FBgn0025630	Rtca	RNA 3'-terminal phosphate cyclase	576.239	-0.404076	0.10877	-3.71496	0.000203237	0.000567945
FBgn0025633	CG13366	uncharacterized protein	2333.21	-0.447095	0.107232	-4.16943	3.05368e-05	9.90027e-05
FBgn0025635	CG17829	uncharacterized protein	877.664	-0.743814	0.13461	-5.52569	3.28198e-08	1.68983e-07
FBgn0025637	SkpA	SKP1-related A	7176.08	-0.480561	0.169512	-2.83497	0.00458301	0.00974835
FBgn0025638	Roc1a	Regulator of cullins 1a	4703.61	-0.443041	0.150989	-2.93425	0.0033435	0.00733214
FBgn0025644	CG14424	uncharacterized protein	4.10863	-2.56097	0.994903	-2.57409	0.0100505	0.0198351
FBgn0025674	CycK	Cyclin K	2364.1	-0.553065	0.101718	-5.43727	5.41046e-08	2.69609e-07
FBgn0025676	CkIIalpha-i3	CKII-alpha subunit interactor-3	500.767	-0.444897	0.199026	-2.23537	0.0253933	0.0457426
FBgn0025716	Bap55	Brahma associated protein 55kD	1420.71	-0.328226	0.0875717	-3.74808	0.00017819	0.000503174
FBgn0025720	Ate1	Arginyltransferase 1	1064.86	-0.219443	0.0779963	-2.8135	0.00490049	0.010371
FBgn0025781	Cdc16	Cell division cycle 16	910.646	-0.837665	0.106487	-7.86638	3.65052e-15	4.83664e-14
FBgn0025807	Rad9	Rad9	247.051	-0.550419	0.172271	-3.19507	0.00139795	0.00331125
FBgn0025808	Rad17	Rad17	286.863	-0.847021	0.14585	-5.80747	6.34222e-09	3.568e-08
FBgn0025809	Paf-AHalpha	Platelet-activating factor acetylhydrolase alpha	1382.3	-0.877991	0.176069	-4.98662	6.1444e-07	2.6148e-06
FBgn0025815	Mcm6	Minichromosome maintenance 6	3089.43	-0.777698	0.126301	-6.1575	7.39017e-10	4.74349e-09
FBgn0025825	HDAC3	Histone deacetylase 3	564.886	-0.357274	0.109031	-3.27682	0.00104982	0.00254704
FBgn0025832	Fen1	Flap endonuclease 1	957.664	-0.916527	0.111026	-8.25506	1.51831e-16	2.36589e-15
FBgn0026060	Mipp2	Multiple inositol polyphosphate phosphatase 2	904.296	-0.273265	0.0976324	-2.79892	0.00512743	0.0108043
FBgn0026079	Nsun2	NOP2-Sun domain family, member 2	3172.33	-0.639716	0.161629	-3.95792	7.5605e-05	0.000228493
FBgn0026085	dgt4	dim gamma-tubulin 4	274.229	-1.08887	0.161863	-6.72708	1.73103e-11	1.39519e-10
FBgn0026089	CG14817	uncharacterized protein	879.449	-0.579886	0.261809	-2.21492	0.0267657	0.0479776
FBgn0026143	CDC45L	CDC45L	1456.77	-0.613016	0.104596	-5.8608	4.60633e-09	2.63693e-08
FBgn0026144	CBP	sarcoplasmic calcium-binding protein	1617.68	-1.63062	0.206161	-7.90946	2.58517e-15	3.51152e-14
FBgn0026147	TTLL4A	Tubulin tyrosine ligase-like 4A	3094.7	-0.784182	0.0970994	-8.07607	6.68866e-16	9.687e-15
FBgn0026149	BCL7-like	BCL7-like	965.417	-0.720504	0.136483	-5.27909	1.29827e-07	6.08741e-07
FBgn0026192	par-6	par-6	1441.59	-0.449525	0.17008	-2.64303	0.00821685	0.0165378
FBgn0026196	nop5	nop5	14587.9	-1.22687	0.161942	-7.57595	3.56522e-14	4.11996e-13
FBgn0026206	mei-P26	meiotic P26	5423.25	-1.43863	0.208947	-6.88517	5.77174e-12	4.9868e-11
FBgn0026207	mbo	members only	1536.12	-0.662892	0.124307	-5.33268	9.67721e-08	4.63041e-07
FBgn0026238	gus	gustavus	2720.18	-0.780952	0.184521	-4.23233	2.31285e-05	7.67726e-05
FBgn0026250	eIF1A	eukaryotic translation initiation factor 1A	11629.1	-0.404504	0.141439	-2.85991	0.00423759	0.00908223
FBgn0026252	msk	moleskin	19354.7	-0.697509	0.103693	-6.72668	1.73577e-11	1.3981e-10
FBgn0026257	cav	caravaggio	458.716	-0.750852	0.169939	-4.41837	9.945e-06	3.48216e-05
FBgn0026259	eIF5B	eukaryotic translation initiation factor 5B	10227.4	-0.943101	0.213954	-4.40796	1.0435e-05	3.63524e-05
FBgn0026261	bonsai	bonsai	1686	-0.586207	0.110907	-5.28558	1.25308e-07	5.89339e-07
FBgn0026263	bip1	bip1	505.111	-0.961207	0.157991	-6.08392	1.17277e-09	7.31536e-09
FBgn0026309	aft	adrift	837.745	-0.51236	0.103318	-4.95906	7.08342e-07	2.98671e-06
FBgn0026317	Tsc1	Tsc1	1870.58	-0.518026	0.131256	-3.94668	7.92433e-05	0.000238674
FBgn0026326	Mad1	Mitotic arrest-deficient 1	1116.95	-0.397522	0.0924984	-4.29761	1.7265e-05	5.82381e-05
FBgn0026361	2021-09-05	Septin 5	465.877	-0.876312	0.138297	-6.33647	2.3509e-10	1.62336e-09
FBgn0026371	SAK	Sak kinase	448.989	-0.695456	0.133283	-5.2179	1.80963e-07	8.32443e-07
FBgn0026373	RpII33	RNA polymerase II 33kD subunit	855.39	-0.592662	0.15358	-3.85897	0.000113865	0.000332993
FBgn0026379	Pten	Phosphatase and tensin homolog	989.327	-0.838217	0.145813	-5.74859	8.99895e-09	4.95022e-08
FBgn0026380	Prosbeta3	Proteasome beta3 subunit	3217.56	-0.326043	0.13663	-2.38633	0.0170176	0.0318884
FBgn0026400	Noa36	Noa36	1466.4	-0.707456	0.16367	-4.32244	1.54313e-05	5.24597e-05
FBgn0026401	Nipped-B	Nipped-B	4027.01	-0.685218	0.216912	-3.15897	0.00158329	0.00370702
FBgn0026402	NiPp1	Nuclear inhibitor of Protein phosphatase 1	427.493	-0.6055	0.143899	-4.20781	2.57862e-05	8.48446e-05
FBgn0026417	Hus1-like	Hus1-like	191.663	-0.819383	0.175256	-4.67535	2.93455e-06	1.13039e-05
FBgn0026418	Hsc70Cb	Hsc70Cb	17122.9	-0.635582	0.122472	-5.18962	2.10721e-07	9.59358e-07
FBgn0026427	Su(var)2-HP2	Su(var)2-HP2	2394.98	-0.804344	0.334873	-2.40194	0.0163084	0.0307549
FBgn0026430	Grip84	Gamma-tubulin ring protein 84	2679.12	-1.08314	0.138147	-7.84052	4.48694e-15	5.83868e-14
FBgn0026431	Grip75	Grip75	587.935	-0.364501	0.105111	-3.46779	0.000524759	0.00135516
FBgn0026433	Grip128	Grip128	938.546	-0.843035	0.122892	-6.85999	6.88652e-12	5.86324e-11
FBgn0026441	ear	ENL/AF9-related	1148.37	-0.379294	0.123501	-3.07119	0.0021321	0.00485524
FBgn0026533	Dek	Dek	6075.2	-0.588392	0.098868	-5.95128	2.66047e-09	1.58375e-08
FBgn0026573	ADD1	ADD domain-containing protein 1	1339.44	-0.604204	0.127166	-4.75129	2.02122e-06	7.98435e-06
FBgn0026598	Apc2	Adenomatous polyposis coli 2	772.472	-0.659064	0.130165	-5.06328	4.12107e-07	1.8014e-06
FBgn0026616	alpha-Man-IIb	alpha-Mannosidase class II b	1130.59	-1.21628	0.183149	-6.64092	3.1173e-11	2.41206e-10
FBgn0026620	tacc	transforming acidic coiled-coil protein	4084.69	-0.401175	0.16231	-2.47165	0.013449	0.0258225
FBgn0026634	ldlCp	ldlCp-related protein	852.349	-0.366216	0.105465	-3.47238	0.000515871	0.00133471
FBgn0026718	Agpat2	1-Acylglycerol-3-phosphate O-acyltransferase 2	960.424	-1.42412	0.232419	-6.12736	8.93485e-10	5.66731e-09
FBgn0026722	drosha	drosha	1236.09	-0.572036	0.111238	-5.14245	2.71176e-07	1.21892e-06
FBgn0026738	CG7857	uncharacterized protein	623.812	-0.726901	0.249195	-2.917	0.00353413	0.00770518
FBgn0026741	mRpL18	mitochondrial ribosomal protein L18	912.668	-0.912238	0.117015	-7.79591	6.39471e-15	8.16677e-14
FBgn0026751	XRCC1	XRCC1	705.579	-0.480455	0.134853	-3.56279	0.000366928	0.000976057
FBgn0026761	Trap1	Trap1	3634.96	-0.51636	0.085699	-6.02528	1.68821e-09	1.0282e-08
FBgn0026778	Rad1	Radiation insensitive 1	153.817	-1.16231	0.192597	-6.03493	1.59031e-09	9.71799e-09
FBgn0026873	MED18	Mediator complex subunit 18	778.726	-0.618111	0.132491	-4.6653	3.08168e-06	1.18265e-05
FBgn0026876	CG11403	uncharacterized protein	640.04	-0.54101	0.148719	-3.63779	0.000274989	0.000751171
FBgn0026878	CG4325	uncharacterized protein	144.433	-1.47802	0.337282	-4.38215	1.17516e-05	4.06758e-05
FBgn0027053	CSN5	COP9 signalosome subunit 5	1608.28	-0.634659	0.0939453	-6.75562	1.42225e-11	1.15837e-10
FBgn0027054	CSN4	COP9 signalosome subunit 4	1838.98	-0.464256	0.149609	-3.10313	0.00191484	0.0044047
FBgn0027055	CSN3	COP9 signalosome subunit 3	1309.15	-0.298804	0.0886683	-3.3699	0.000751943	0.0018854
FBgn0027079	ValRS	Valyl-tRNA synthetase	4357.16	-0.366689	0.122968	-2.98199	0.00286378	0.00635437
FBgn0027080	TyrRS	Tyrosyl-tRNA synthetase	4162.34	-0.393203	0.152251	-2.5826	0.00980581	0.0194018
FBgn0027081	ThrRS	Threonyl-tRNA synthetase	7806.34	-0.372241	0.110844	-3.35823	0.000784432	0.00195958
FBgn0027082	ProRS-m	Prolyl-tRNA synthetase, mitochondrial	287.724	-0.509275	0.10235	-4.97583	6.49689e-07	2.75346e-06
FBgn0027084	LysRS	Lysyl-tRNA synthetase	8040.52	-0.579344	0.129888	-4.46034	8.18285e-06	2.91207e-05
FBgn0027085	LeuRS-m	Leucyl-tRNA synthetase, mitochondrial	872.625	-0.303749	0.0850891	-3.56978	0.000357287	0.000952457
FBgn0027086	IleRS	Isoleucyl-tRNA synthetase	7045.93	-0.824884	0.133643	-6.17228	6.73109e-10	4.35202e-09
FBgn0027088	GlyRS	Glycyl-tRNA synthetase	5253.11	-0.555919	0.121912	-4.56	5.11532e-06	1.88709e-05
FBgn0027090	GlnRS	Glutaminyl-tRNA synthetase	4076.12	-0.493749	0.162278	-3.0426	0.00234543	0.00528948
FBgn0027091	CysRS	Cysteinyl-tRNA synthetase	2606.8	-0.752749	0.113868	-6.61069	3.82544e-11	2.93434e-10
FBgn0027093	ArgRS	Arginyl-tRNA synthetase	2670.58	-0.850671	0.157679	-5.39495	6.85427e-08	3.3628e-07
FBgn0027094	AlaRS	Alanyl-tRNA synthetase	7839.69	-0.443073	0.112473	-3.93938	8.16935e-05	0.000245398
FBgn0027095	Manf	Mesencephalic astrocyte-derived neurotrophic factor	1744.7	-0.385978	0.148023	-2.60755	0.00911916	0.0181358
FBgn0027259	Kmn1	kinetochore Mis12-Ndc80 network component 1	253.119	-0.984395	0.317839	-3.09715	0.00195393	0.00448245
FBgn0027280	l(1)G0193	lethal (1) G0193	4774.02	-0.271419	0.112077	-2.42172	0.0154472	0.0292644
FBgn0027296	temp	tempura	717.161	-0.876497	0.161705	-5.42035	5.94839e-08	2.94401e-07
FBgn0027329	CCT6	Chaperonin containing TCP1 subunit 6	12640.9	-0.510377	0.116137	-4.3946	1.10977e-05	3.85419e-05
FBgn0027330	l(1)G0020	lethal (1) G0020	4164.14	-1.15247	0.101328	-11.3737	5.65687e-30	2.75895e-28
FBgn0027334	l(1)G0004	lethal (1) G0004	2816.47	-0.710716	0.225504	-3.15168	0.00162333	0.00379575
FBgn0027338	Kap-alpha3	karyopherin alpha3	10052.1	-0.486928	0.0831363	-5.85699	4.71337e-09	2.69323e-08
FBgn0027342	fz4	frizzled 4	909.407	-0.290571	0.0990309	-2.93415	0.00334463	0.00733331
FBgn0027348	bgm	bubblegum	1104.34	-0.536917	0.154136	-3.48341	0.000495078	0.00128656
FBgn0027358	Tim9b	Translocase of inner membrane 9b	504.537	-0.619996	0.117009	-5.2987	1.16632e-07	5.52306e-07
FBgn0027359	Tim8	Tim8	1640.58	-0.496706	0.221978	-2.23764	0.0252444	0.0455149
FBgn0027360	Tim10	Translocase of inner membrane 10	2570.1	-0.701034	0.180243	-3.88939	0.000100496	0.000297263
FBgn0027364	Six4	Six4	2399.52	-2.03499	0.239356	-8.50192	1.86486e-17	3.2086e-16
FBgn0027375	RecQ5	RecQ5 helicase	1041.82	-0.907559	0.139749	-6.49422	8.34647e-11	6.11811e-10
FBgn0027378	MRG15	MORF-related gene 15	963.125	-0.340402	0.0976103	-3.48736	0.000487818	0.00126902
FBgn0027490	D12	D12	422.455	-0.906167	0.133062	-6.81013	9.75094e-12	8.13432e-11
FBgn0027495	Smyd4-4	SET and MYND domain containing, class 4, member 4	1851.28	-0.776493	0.126253	-6.15029	7.7341e-10	4.95142e-09
FBgn0027499	wde	windei	1893.54	-0.491216	0.176807	-2.77826	0.00546507	0.0114225
FBgn0027500	spd-2	spindle defective 2	1618.16	-1.21921	0.128455	-9.49132	2.28123e-21	5.60712e-20
FBgn0027503	CG11970	uncharacterized protein	1301.66	-0.595756	0.138001	-4.31704	1.58138e-05	5.3701e-05
FBgn0027504	CG8878	uncharacterized protein	1482.2	-0.333264	0.107403	-3.10292	0.0019162	0.00440652
FBgn0027506	EDTP	Egg-derived tyrosine phosphatase	1964.74	-0.45291	0.0909224	-4.98128	6.31653e-07	2.68252e-06
FBgn0027507	CG1344	uncharacterized protein	1877.05	-0.772318	0.136002	-5.67874	1.35693e-08	7.31173e-08
FBgn0027512	CG10254	uncharacterized protein	12165.9	-2.10637	0.27965	-7.53218	4.99018e-14	5.66102e-13
FBgn0027514	CG1024	uncharacterized protein	508.806	-0.451864	0.092099	-4.90629	9.28171e-07	3.86651e-06
FBgn0027518	Wdr24	WD repeat domain 24	663.414	-0.716174	0.109686	-6.5293	6.60758e-11	4.9103e-10
FBgn0027521	CG3679	uncharacterized protein	879.987	-1.72012	0.133645	-12.8709	6.56633e-38	5.57149e-36
FBgn0027524	CG3909	uncharacterized protein	803.272	-0.440883	0.0931311	-4.734	2.20138e-06	8.65189e-06
FBgn0027528	goe	gone early	1245.05	-0.897056	0.12687	-7.07067	1.54184e-12	1.44371e-11
FBgn0027529	tapas	tapas	3090.11	-0.453796	0.0910782	-4.98249	6.27708e-07	2.66851e-06
FBgn0027532	CG7139	uncharacterized protein	1655.31	-0.337407	0.134725	-2.50441	0.0122656	0.0237416
FBgn0027537	Nup93-1	Nucleoporin 93kD-1	2881.22	-0.772576	0.105991	-7.28908	3.12079e-13	3.18192e-12
FBgn0027538	beta4GalNAcTA	beta1,4-N-acetylgalactosaminyltransferase A	561.885	-0.639235	0.108696	-5.88096	4.07897e-09	2.35573e-08
FBgn0027539	lili	lilipod	853.02	-0.420147	0.142105	-2.95661	0.00311046	0.00686484
FBgn0027548	nito	spenito	3340.34	-0.446216	0.178943	-2.49362	0.0126447	0.0243878
FBgn0027549	Nulp1	Nuclear localized protein 1	1743.09	-0.400853	0.0996849	-4.0212	5.7903e-05	0.000178611
FBgn0027553	NELF-B	NELF-B	700.632	-0.588642	0.11126	-5.29068	1.21861e-07	5.73996e-07
FBgn0027565	CG5498	uncharacterized protein	925.399	-0.585008	0.156519	-3.73762	0.000185771	0.000523031
FBgn0027567	CG8108	uncharacterized protein	6709.94	-0.532139	0.134256	-3.96362	7.3822e-05	0.000223651
FBgn0027574	CG5815	uncharacterized protein	927.38	-0.415104	0.125592	-3.30517	0.000949198	0.00232431
FBgn0027579	mino	minotaur	2929.71	-0.34201	0.107102	-3.1933	0.00140655	0.00332844
FBgn0027582	CG6230	uncharacterized protein	2859.74	-0.465339	0.14181	-3.28142	0.00103285	0.00251028
FBgn0027587	CG7028	uncharacterized protein	1772.36	-0.565	0.133608	-4.2288	2.34943e-05	7.79035e-05
FBgn0027592	MED15	Mediator complex subunit 15	1240.77	-0.273109	0.0718461	-3.8013	0.000143937	0.000413614
FBgn0027599	CG2790	uncharacterized protein	690.098	-0.388392	0.144787	-2.68251	0.00730712	0.0148492
FBgn0027602	CG8611	uncharacterized protein	2812.95	-1.13523	0.15884	-7.147	8.86964e-13	8.57075e-12
FBgn0027611	LManII	Lysosomal alpha-mannosidase II	2596.13	-0.560596	0.242331	-2.31335	0.0207036	0.0380812
FBgn0027615	OXA1L	OXA1L mitochondrial inner membrane protein	1671.8	-0.540875	0.100746	-5.36869	7.93091e-08	3.84834e-07
FBgn0027617	CG5808	uncharacterized protein	541.512	-1.01952	0.165522	-6.15939	7.30272e-10	4.69536e-09
FBgn0027619	eIF3j	eukaryotic translation initiation factor 3 subunit j	4937.36	-0.514046	0.14103	-3.64494	0.000267456	0.000732856
FBgn0027660	blot	bloated tubules	1480.14	-0.360828	0.146221	-2.46769	0.0135988	0.0260696
FBgn0027780	Aasdh	Aminoadipate-semialdehyde dehydrogenase	533.399	-0.600095	0.133219	-4.50458	6.65031e-06	2.40327e-05
FBgn0027783	SMC2	Structural maintenance of chromosomes 2	1380.57	-0.487307	0.209221	-2.32914	0.0198515	0.0366936
FBgn0027786	Mtch	Mitochondrial carrier homolog 1	3110.61	-0.28013	0.113718	-2.46337	0.0137636	0.0263448
FBgn0027835	Dp1	Dodeca-satellite-binding protein 1	26241.1	-0.491495	0.113188	-4.34227	1.41016e-05	4.83372e-05
FBgn0027841	CstF64	Cleavage stimulation factor 64 kD subunit	920.464	-0.553195	0.160331	-3.45032	0.000559919	0.00143817
FBgn0027864	Ogg1	8-oxoguanine DNA glycosylase	380.506	-0.64253	0.223146	-2.87941	0.00398419	0.00858666
FBgn0027872	rdgBbeta	rdgBbeta	762.566	-1.18112	0.0825127	-14.3143	1.78038e-46	2.5351e-44
FBgn0027873	Cpsf100	Cleavage and polyadenylation specificity factor 100	892.175	-0.504731	0.0969774	-5.20463	1.94386e-07	8.89896e-07
FBgn0027889	ball	ballchen	1583.91	-0.735136	0.1197	-6.14148	8.1754e-10	5.21508e-09
FBgn0027903	CG12018	uncharacterized protein	639.715	-0.933232	0.157105	-5.94018	2.84712e-09	1.68838e-08
FBgn0027945	ppl	pumpless	1100.11	-0.422203	0.148681	-2.83966	0.00451623	0.00962613
FBgn0027948	msps	mini spindles	7048.28	-0.61789	0.209708	-2.94643	0.00321461	0.00707329
FBgn0027949	msb1l	msb1l	577.166	-0.728265	0.169509	-4.29632	1.7366e-05	5.85546e-05
FBgn0027951	MTA1-like	Metastasis associated 1-like	2917.23	-0.4264	0.0847602	-5.03066	4.88792e-07	2.11367e-06
FBgn0028327	l(1)G0320	lethal (1) G0320	7471.11	-0.212598	0.0865238	-2.45711	0.014006	0.0267591
FBgn0028331	l(1)G0289	lethal (1) G0289	7011.62	-1.61426	0.210035	-7.68566	1.52213e-14	1.85958e-13
FBgn0028343	Ankle2	Ankyrin repeat and LEM domain containing 2	2041.05	-0.483287	0.11919	-4.05477	5.01836e-05	0.000156436
FBgn0028360	Cdc7	Cdc7 kinase	1888.33	-0.959594	0.111549	-8.60243	7.80441e-18	1.39511e-16
FBgn0028375	heix	heixuedian	1059.06	-0.295266	0.123181	-2.39701	0.0165296	0.0311293
FBgn0028380	fal	falten	1006.32	-1.20264	0.11227	-10.7121	8.93587e-27	3.42717e-25
FBgn0028382	cyp33	cyclophilin-33	829.542	-0.798019	0.171757	-4.64621	3.38091e-06	1.28356e-05
FBgn0028387	chm	chameau	546.439	-0.508285	0.0840031	-6.05079	1.44136e-09	8.90107e-09
FBgn0028406	Drep4	DNA fragmentation factor-related protein 4	582.161	-0.89447	0.108195	-8.26719	1.37157e-16	2.14263e-15
FBgn0028408	Drep2	DNA fragmentation factor-related protein 2	3755.98	-1.98723	0.308137	-6.44916	1.12472e-10	8.08177e-10
FBgn0028411	Nxt1	NTF2-related export protein 1	1130.37	-0.897698	0.183021	-4.90489	9.34782e-07	3.89115e-06
FBgn0028425	JhI-21	Juvenile hormone Inducible-21	2039.88	-0.582504	0.184123	-3.16367	0.00155792	0.00365037
FBgn0028426	NA	NA	1437.9	-0.821737	0.138888	-5.91656	3.28754e-09	1.93381e-08
FBgn0028434	Ercc1	Ercc1	238.928	-0.671982	0.137546	-4.8855	1.03165e-06	4.25718e-06
FBgn0028436	ECSIT	ECSIT	416.58	-0.41473	0.136035	-3.0487	0.00229834	0.0051918
FBgn0028471	Nab2	Nuclear polyadenosine RNA-binding 2	1414.72	-0.306743	0.119201	-2.57333	0.0100727	0.0198663
FBgn0028473	Non1	Novel nucleolar protein 1	19094	-0.636542	0.154185	-4.12844	3.65231e-05	0.000116731
FBgn0028474	CG4119	uncharacterized protein	2528.15	-0.423347	0.172073	-2.46028	0.0138828	0.0265534
FBgn0028476	Usp1	Ubiquitin specific protease 1	1865.89	-0.551185	0.0937634	-5.87846	4.14089e-09	2.38926e-08
FBgn0028504	CG12182	uncharacterized protein	292.252	-0.819555	0.107939	-7.59277	3.13138e-14	3.69092e-13
FBgn0028506	CG4455	uncharacterized protein	857.839	-0.499205	0.112727	-4.42844	9.49154e-06	3.33469e-05
FBgn0028525	c(2)M	crossover suppressor on 2 of Manheim	292.283	-2.49489	0.305758	-8.15969	3.35897e-16	5.03406e-15
FBgn0028530	mTTF	mitochondrial transcription termination factor	576.363	-0.658175	0.159111	-4.13658	3.52524e-05	0.000112873
FBgn0028554	x16	x16 splicing factor	4101.81	-0.657091	0.255345	-2.57334	0.0100722	0.0198663
FBgn0028563	sut1	sugar transporter 1	1887.24	-0.801135	0.161019	-4.97541	6.51099e-07	2.75849e-06
FBgn0028572	qtc	quick-to-court	1359.43	-1.37605	0.343352	-4.0077	6.13139e-05	0.000188242
FBgn0028581	mei-217	mei-217	268.153	-1.71893	0.353541	-4.86204	1.16182e-06	4.75789e-06
FBgn0028583	lcs	la costa	9.88609	-21.6172	3.97119	-5.4435	5.22434e-08	2.60661e-07
FBgn0028644	beat-Ic	beaten path Ic	25.8637	-1.99657	0.424258	-4.70602	2.52606e-06	9.8436e-06
FBgn0028645	beat-Ib	beaten path Ib	23.6512	-2.87513	0.566959	-5.07115	3.95416e-07	1.73518e-06
FBgn0028647	CG11902	uncharacterized protein	525.867	-0.48408	0.207438	-2.33361	0.0196159	0.0362959
FBgn0028648	mRpL50	mitochondrial ribosomal protein L50	760.31	-0.521046	0.153163	-3.40192	0.000669151	0.00169103
FBgn0028658	Adat1	Adenosine deaminase, tRNA-specific 1	224.649	-0.570785	0.164159	-3.47702	0.000507026	0.0013143
FBgn0028683	spt4	spt4	399.77	-0.721646	0.229983	-3.13782	0.00170207	0.00395893
FBgn0028684	Rpt5	Regulatory particle triple-A ATPase 5	4100.75	-0.194991	0.0824111	-2.36607	0.0179779	0.0335154
FBgn0028688	Rpn7	Regulatory particle non-ATPase 7	3744.07	-0.23357	0.105917	-2.20522	0.0274385	0.0490417
FBgn0028689	Rpn6	Regulatory particle non-ATPase 6	6080.24	-0.224596	0.0961031	-2.33703	0.0194375	0.0359928
FBgn0028690	Rpn5	Regulatory particle non-ATPase 5	5325.31	-0.307301	0.105842	-2.9034	0.0036914	0.00800635
FBgn0028694	Rpn11	Regulatory particle non-ATPase 11	3969.23	-0.329611	0.100667	-3.27428	0.00105933	0.00256861
FBgn0028697	RpL15	Ribosomal protein L15	57347.9	-0.753573	0.233949	-3.2211	0.00127698	0.0030445
FBgn0028700	RfC38	Replication factor C 38kD subunit	1192.36	-1.02834	0.181498	-5.66581	1.46334e-08	7.85775e-08
FBgn0028707	Mt2	Methyltransferase 2	284.064	-1.52302	0.225802	-6.74494	1.53089e-11	1.24033e-10
FBgn0028708	Mst85C	Mst85C	429.462	-0.306302	0.110321	-2.77647	0.00549528	0.0114799
FBgn0028734	Fmr1	Fmr1	7224.89	-0.388797	0.112173	-3.46606	0.000528153	0.00136279
FBgn0028744	CG5033	uncharacterized protein	4881.44	-1.1021	0.136116	-8.09682	5.64128e-16	8.26055e-15
FBgn0028836	CSN7	COP9 signalosome subunit 7	1671.56	-0.547596	0.109084	-5.01994	5.16864e-07	2.224e-06
FBgn0028837	CSN6	COP9 signalosome subunit 6	1179.69	-0.242545	0.0927996	-2.61364	0.00895822	0.0178588
FBgn0028862	dao	down and out	145.247	-2.41559	0.369226	-6.54231	6.05746e-11	4.53687e-10
FBgn0028895	CG17328	uncharacterized protein	156.976	-0.724088	0.177214	-4.08596	4.38957e-05	0.000138613
FBgn0028897	CG4935	uncharacterized protein	150.014	-0.842565	0.246088	-3.42383	0.000617444	0.00157482
FBgn0028919	CG16865	uncharacterized protein	266.346	-0.490785	0.150519	-3.26061	0.00111172	0.00268669
FBgn0028932	CG16890	uncharacterized protein	353.605	-0.581701	0.172223	-3.3776	0.000731221	0.00183702
FBgn0028953	CG14478	uncharacterized protein	3572.82	-0.384047	0.144174	-2.66377	0.00772702	0.0156383
FBgn0028980	tant	tantalus	358.212	-0.398457	0.170627	-2.33525	0.0195301	0.0361481
FBgn0028992	sds22	sds22	1086.5	-0.284703	0.108144	-2.63262	0.00847279	0.017006
FBgn0028997	nmdyn-D7	nmdyn-D7	172.996	-0.733997	0.150928	-4.86323	1.15487e-06	4.73257e-06
FBgn0029002	miple2	midkine and pleiotrophin 2	2168.55	-0.448014	0.139779	-3.20517	0.00134985	0.00320588
FBgn0029006	Smurf	SMAD specific E3 ubiquitin protein ligase	2178.3	-0.448107	0.13542	-3.30902	0.000936226	0.00229526
FBgn0029067	Dd	Dullard	1165.25	-0.451066	0.125514	-3.59375	0.000325955	0.000876096
FBgn0029079	icln	icln	1190.81	-0.988701	0.169304	-5.83981	5.22613e-09	2.9657e-08
FBgn0029092	ced-6	ced-6	6158.62	-0.513039	0.127386	-4.02743	5.63901e-05	0.000174379
FBgn0029094	asf1	anti-silencing factor 1	1538.28	-0.560413	0.172244	-3.2536	0.00113951	0.00274689
FBgn0029113	Uba2	Ubiquitin activating enzyme 2	5880.52	-0.620474	0.0903025	-6.87106	6.37259e-12	5.46323e-11
FBgn0029118	ScsbetaG	Succinyl-coenzyme A synthetase beta subunit, GDP-forming	1747.59	-0.362661	0.0780081	-4.64902	3.33518e-06	1.26854e-05
FBgn0029133	REG	REG	8803.38	-1.06032	0.142945	-7.41771	1.19163e-13	1.27257e-12
FBgn0029134	Prosbeta5	Proteasome beta5 subunit	4712.6	-0.244473	0.100965	-2.42136	0.0154627	0.0292893
FBgn0029148	NHP2	NHP2	5746.94	-1.36777	0.211842	-6.45656	1.07109e-10	7.71883e-10
FBgn0029174	Fkbp59	FK506-binding protein 59kD	8518.28	-0.874413	0.155483	-5.62385	1.86744e-08	9.8947e-08
FBgn0029502	Coq7	Coenzyme Q7	946.103	-0.42312	0.134226	-3.1523	0.0016199	0.00378914
FBgn0029503	CHORD	CHORD	789.197	-0.439461	0.114748	-3.82978	0.00012826	0.000372192
FBgn0029504	CHES-1-like	Checkpoint suppressor 1-like	3047.9	-0.787996	0.219315	-3.59298	0.000326911	0.000878286
FBgn0029512	Aos1	Activator of SUMO 1	2581.78	-0.758805	0.150925	-5.02771	4.96369e-07	2.14177e-06
FBgn0029514	312	312	324.872	-0.579188	0.098003	-5.9099	3.42316e-09	2.00882e-08
FBgn0029522	CG13373	uncharacterized protein	638.553	-1.45193	0.20564	-7.06054	1.65855e-12	1.54948e-11
FBgn0029525	CG18273	uncharacterized protein	3067.36	-1.11247	0.138111	-8.05491	7.95392e-16	1.14175e-14
FBgn0029573	CG14770	uncharacterized protein	6.2193	-1.73583	0.676166	-2.56717	0.0102533	0.0201744
FBgn0029588	NA	NA	63.1163	-1.43891	0.355962	-4.04232	5.29246e-05	0.000164318
FBgn0029603	CG14053	uncharacterized protein	158.804	-2.39478	0.446458	-5.36396	8.14191e-08	3.94763e-07
FBgn0029662	CG12206	uncharacterized protein	194.753	-0.585759	0.19569	-2.9933	0.00275976	0.00614338
FBgn0029665	CG14270	uncharacterized protein	1127.99	-1.04216	0.219393	-4.75019	2.03224e-06	8.02375e-06
FBgn0029666	CG10803	uncharacterized protein	1836.14	-0.397068	0.150115	-2.64509	0.00816686	0.0164479
FBgn0029672	CG2875	uncharacterized protein	1669.9	-1.10953	0.137944	-8.04332	8.74335e-16	1.24784e-14
FBgn0029676	HIP-R	Hsc/Hsp70-interacting protein related	4948.68	-0.641489	0.199571	-3.21433	0.00130748	0.00311244
FBgn0029686	Glos	Gaulos	662.905	-0.605886	0.081007	-7.47943	7.46458e-14	8.26373e-13
FBgn0029687	Vap33	VAMP-associated protein 33kDa	10470.2	-0.697947	0.188556	-3.70153	0.000214302	0.000596177
FBgn0029689	CG6428	uncharacterized protein	521.59	-0.451556	0.108158	-4.17497	2.98026e-05	9.68253e-05
FBgn0029690	CG6414	uncharacterized protein	45.2673	-1.26135	0.375628	-3.35798	0.000785135	0.00196094
FBgn0029694	CG15375	uncharacterized protein	5.16281	-1.51308	0.682753	-2.21615	0.0266812	0.04784
FBgn0029713	CG11436	uncharacterized protein	303.945	-0.440583	0.142513	-3.09152	0.00199134	0.00455983
FBgn0029714	CG3527	uncharacterized protein	1086.49	-0.80924	0.205906	-3.93015	8.48931e-05	0.000254453
FBgn0029716	CG3546	uncharacterized protein	4.24653	-2.73664	1.1931	-2.29373	0.0218061	0.039884
FBgn0029718	mRpL30	mitochondrial ribosomal protein L30	2188	-0.767164	0.224669	-3.41465	0.00063865	0.00162356
FBgn0029733	CG6927	uncharacterized protein	779.363	-2.03111	0.317964	-6.38785	1.68237e-10	1.1788e-09
FBgn0029753	CG4198	uncharacterized protein	125.095	-1.58283	0.358186	-4.41901	9.91557e-06	3.47283e-05
FBgn0029754	CG15930	uncharacterized protein	50.997	-0.812475	0.294127	-2.76233	0.00573911	0.0119509
FBgn0029755	Sas10	Something about silencing 10	2204.09	-0.776872	0.180082	-4.31399	1.60334e-05	5.43424e-05
FBgn0029756	CG3309	uncharacterized protein	466.915	-0.561205	0.18859	-2.9758	0.00292228	0.00647144
FBgn0029763	Usp16-45	Ubiquitin specific protease 16/45	3742.06	-0.971729	0.293155	-3.31473	0.000917309	0.00225245
FBgn0029785	RpL35	Ribosomal protein L35	48142.2	-0.566054	0.161074	-3.51424	0.000441013	0.00115429
FBgn0029798	CG4078	uncharacterized protein	954.515	-0.569026	0.131402	-4.33042	1.48827e-05	5.07059e-05
FBgn0029800	lin-52	lin-52	539.161	-0.752891	0.176735	-4.26	2.04425e-05	6.82223e-05
FBgn0029813	AgmNAT	Agmatine N-acetyltransferase	253.497	-0.960027	0.36831	-2.60657	0.00914529	0.018179
FBgn0029822	CG12236	uncharacterized protein	804.564	-0.679887	0.148017	-4.59332	4.36247e-06	1.62631e-05
FBgn0029825	CG12728	uncharacterized protein	442.788	-0.843861	0.196089	-4.30346	1.68149e-05	5.68512e-05
FBgn0029833	MCTS1	Malignant T cell amplified sequence 1	1372.72	-0.638032	0.187533	-3.40223	0.000668376	0.00168942
FBgn0029836	CG5928	uncharacterized protein	10.1942	-3.16921	1.02808	-3.08264	0.00205171	0.00468941
FBgn0029843	Nep1	Neprilysin 1	423.004	-1.20464	0.504978	-2.38553	0.0170545	0.0319478
FBgn0029856	CG11700	uncharacterized protein	29.2244	-0.950722	0.304928	-3.11786	0.0018217	0.0042158
FBgn0029863	CG3823	uncharacterized protein	14.1271	-1.58648	0.672014	-2.36078	0.0182364	0.0339616
FBgn0029866	CG3842	uncharacterized protein	409.117	-0.949959	0.234261	-4.05514	5.0105e-05	0.00015623
FBgn0029867	CG3847	uncharacterized protein	2677.37	-0.351271	0.11415	-3.07729	0.00208894	0.00476659
FBgn0029873	CG3918	uncharacterized protein	1373.58	-0.718013	0.124414	-5.77113	7.87397e-09	4.35653e-08
FBgn0029878	Pat1	Protein interacting with APP tail-1	2257.18	-0.250792	0.091988	-2.72635	0.00640382	0.0131647
FBgn0029879	APC7	Anaphase Promoting Complex subunit 7	1102.64	-2.16595	0.463137	-4.6767	2.91521e-06	1.12399e-05
FBgn0029882	CG3226	uncharacterized protein	2374.7	-0.478589	0.1208	-3.96183	7.43788e-05	0.000225062
FBgn0029885	CG3224	uncharacterized protein	1893	-1.01674	0.210002	-4.84159	1.28805e-06	5.24192e-06
FBgn0029906	xit	xiantuan	500.64	-0.326259	0.128526	-2.53846	0.011134	0.0217175
FBgn0029915	CG14434	uncharacterized protein	1616.56	-0.80415	0.281608	-2.85556	0.00429604	0.00919564
FBgn0029929	CG4593	uncharacterized protein	1531.3	-0.880265	0.162558	-5.41507	6.12632e-08	3.02724e-07
FBgn0029935	CG4615	uncharacterized protein	381.413	-0.31757	0.099675	-3.18606	0.00144227	0.00340191
FBgn0029939	CG9650	uncharacterized protein	433.619	-1.45131	0.355062	-4.08748	4.3609e-05	0.000137813
FBgn0029941	CG1677	uncharacterized protein	5776.27	-0.439367	0.118637	-3.70346	0.000212678	0.000592189
FBgn0029942	CG2059	uncharacterized protein	460.581	-0.583309	0.244701	-2.38376	0.0171368	0.0320767
FBgn0029944	Dok	Downstream of kinase	1548.68	-0.561156	0.159651	-3.5149	0.000439926	0.00115218
FBgn0029970	Nek2	Nek2	259.655	-1.27825	0.196334	-6.51056	7.48696e-11	5.52074e-10
FBgn0029974	dpr14	defective proboscis extension response 14	31.6411	-0.858225	0.333507	-2.57333	0.0100724	0.0198663
FBgn0029979	mahe	maheshvara	7218	-0.905584	0.234101	-3.86835	0.000109575	0.000321739
FBgn0029980	CG10778	uncharacterized protein	830.934	-0.572026	0.16513	-3.46409	0.000532034	0.0013718
FBgn0029992	Upf2	Upf2	2243.53	-1.03236	0.105638	-9.77264	1.47559e-22	3.9311e-21
FBgn0029996	UbcE2H	Ubiquitin conjugating enzyme E2H	3844.65	-0.44518	0.170763	-2.607	0.00913382	0.0181592
FBgn0029997	CG2258	uncharacterized protein	1049.56	-0.515208	0.144303	-3.57033	0.000356536	0.00095107
FBgn0029999	CG1575	uncharacterized protein	1144.74	-0.89585	0.159758	-5.60756	2.05198e-08	1.08401e-07
FBgn0030000	CG2260	uncharacterized protein	1936.6	-0.711695	0.191364	-3.71906	0.000199962	0.00055993
FBgn0030003	CG2116	uncharacterized protein	914.024	-0.338841	0.119505	-2.83537	0.00457729	0.00973784
FBgn0030007	alpha-PheRS	Phenylalanyl-tRNA synthetase, alpha-subunit	2947.95	-0.459173	0.138145	-3.32385	0.000887832	0.00219224
FBgn0030008	CG2129	uncharacterized protein	328.404	-0.791208	0.194826	-4.06109	4.88434e-05	0.00015268
FBgn0030010	CG10959	uncharacterized protein	195.375	-0.79998	0.180575	-4.43018	9.41539e-06	3.31075e-05
FBgn0030018	slpr	slipper	2515.93	-0.8231	0.169597	-4.85329	1.21433e-06	4.95654e-06
FBgn0030025	CG2147	uncharacterized protein	603.517	-0.308096	0.120853	-2.54935	0.0107923	0.0211031
FBgn0030028	Corp	Companion of reaper	683.002	-1.06467	0.212507	-5.01004	5.44199e-07	2.3338e-06
FBgn0030030	CG1636	uncharacterized protein	857.354	-0.844349	0.104674	-8.06645	7.23721e-16	1.04492e-14
FBgn0030037	Miga	Mitoguardin	2259.74	-1.35364	0.164861	-8.21081	2.19706e-16	3.35601e-15
FBgn0030048	CG12112	uncharacterized protein	409.498	-1.39628	0.271149	-5.14947	2.61219e-07	1.17629e-06
FBgn0030049	Trf4-1	Topoisomerase related function 4-1	3293.17	-0.351312	0.158637	-2.21456	0.02679	0.0480143
FBgn0030054	Caf1-180	Chromatin assembly factor 1, p180 subunit	2116.42	-0.967317	0.233363	-4.14511	3.39649e-05	0.000109089
FBgn0030056	CAH3	Carbonic anhydrase 3	3046.04	-0.812372	0.120056	-6.7666	1.31842e-11	1.08163e-10
FBgn0030060	CG2004	uncharacterized protein	1961.49	-0.364886	0.134611	-2.71068	0.00671457	0.013753
FBgn0030061	CG1785	uncharacterized protein	3992.17	-0.89296	0.154915	-5.76419	8.20531e-09	4.5358e-08
FBgn0030063	CG1789	uncharacterized protein	996.338	-0.898295	0.200793	-4.47375	7.68605e-06	2.74711e-05
FBgn0030067	Rbm13	RNA-binding motif protein 13	3301.46	-0.947298	0.210974	-4.49012	7.11837e-06	2.55898e-05
FBgn0030081	CG7246	uncharacterized protein	1660.44	-1.04765	0.150631	-6.95508	3.5235e-12	3.12226e-11
FBgn0030082	HP1b	Heterochromatin Protein 1b	1304.2	-0.405922	0.165796	-2.44833	0.0143521	0.0273445
FBgn0030085	CG6999	uncharacterized protein	23.5601	-2.02193	0.51224	-3.94724	7.90578e-05	0.000238173
FBgn0030086	CCT2	Chaperonin containing TCP1 subunit 2	16349.5	-0.52089	0.154778	-3.36541	0.000764311	0.00191395
FBgn0030088	Arfrp1	ADP-ribosylation factor related protein 1	323.142	-0.355981	0.151445	-2.35056	0.0187454	0.0348467
FBgn0030090	fend	forked end	785.058	-1.11356	0.204478	-5.44588	5.15493e-08	2.57393e-07
FBgn0030091	CG7065	uncharacterized protein	1350.18	-0.581665	0.126371	-4.60282	4.16809e-06	1.56184e-05
FBgn0030092	fh	frataxin	260.026	-0.489499	0.199321	-2.45583	0.014056	0.026838
FBgn0030096	Zpr1	Zpr1	1689.96	-0.526945	0.175321	-3.00561	0.00265053	0.00591723
FBgn0030100	CG12106	uncharacterized protein	224.256	-0.556048	0.153353	-3.62593	0.000287921	0.000783045
FBgn0030122	Aladin	aladin	1435.35	-0.940159	0.155468	-6.04728	1.47314e-09	9.07471e-09
FBgn0030137	CG15317	uncharacterized protein	182.217	-1.2091	0.25926	-4.66364	3.10672e-06	1.19189e-05
FBgn0030151	CG1354	uncharacterized protein	7137.61	-0.480069	0.122568	-3.91674	8.97533e-05	0.000267607
FBgn0030170	CG2990	uncharacterized protein	343.626	-0.933678	0.173378	-5.38522	7.23575e-08	3.53038e-07
FBgn0030174	CG15312	uncharacterized protein	809.24	-2.18604	0.276884	-7.89514	2.8999e-15	3.88788e-14
FBgn0030177	CG2972	uncharacterized protein	2878.89	-0.972718	0.176992	-5.49582	3.88893e-08	1.98828e-07
FBgn0030178	Naxe	NAD(P)HX epimerase	455.418	-0.740773	0.181584	-4.07951	4.51315e-05	0.000142009
FBgn0030181	CG12645	uncharacterized protein	9.04183	-1.25015	0.532256	-2.34877	0.0188354	0.0349876
FBgn0030187	Ipod	Interaction partner of Dnmt2	36.0367	-1.29111	0.514724	-2.50835	0.0121295	0.0235149
FBgn0030196	Psf3	Psf3	651.057	-0.439469	0.131025	-3.35409	0.000796261	0.00198701
FBgn0030217	CG2124	uncharacterized protein	391.258	-0.93911	0.130786	-7.18051	6.94519e-13	6.80673e-12
FBgn0030218	CG1628	uncharacterized protein	1339.33	-0.746175	0.20024	-3.72641	0.000194225	0.000545098
FBgn0030228	BTBD9	BTB (POZ) domain containing 9	970.593	-0.349427	0.130524	-2.67711	0.00742606	0.0150686
FBgn0030241	feo	fascetto	1969.76	-0.817432	0.182642	-4.4756	7.61968e-06	2.72496e-05
FBgn0030242	sofe	sister of feo	413.658	-0.876835	0.185013	-4.73931	2.1445e-06	8.44439e-06
FBgn0030246	CG1582	uncharacterized protein	2079.02	-0.577569	0.102806	-5.61804	1.9314e-08	1.02161e-07
FBgn0030268	Klp10A	Kinesin-like protein at 10A	2887.49	-0.338238	0.0919325	-3.67919	0.000233971	0.000647696
FBgn0030291	CG1738	uncharacterized protein	422.704	-0.993584	0.275279	-3.60937	0.000306945	0.000829682
FBgn0030292	CG11752	uncharacterized protein	1329.55	-0.370339	0.108749	-3.40544	0.000660586	0.00167212
FBgn0030301	HP5	Heterochromatin protein 5	1301.44	-0.774111	0.124439	-6.22078	4.94675e-10	3.25613e-09
FBgn0030314	CG11696	uncharacterized protein	672.609	-0.504594	0.151167	-3.33799	0.000843873	0.00209497
FBgn0030320	CG2247	uncharacterized protein	1416.2	-0.799656	0.146705	-5.45077	5.01513e-08	2.50919e-07
FBgn0030321	CG1703	uncharacterized protein	7124.31	-0.7025	0.173227	-4.05536	5.00566e-05	0.000156148
FBgn0030330	Tango10	Transport and Golgi organization 10	1561.1	-0.439987	0.120883	-3.63979	0.000272862	0.000746185
FBgn0030342	CG10347	uncharacterized protein	1010.07	-0.656981	0.111964	-5.86779	4.41651e-09	2.53807e-08
FBgn0030344	Nrd1	Nardilysin	2331.49	-0.592899	0.0983667	-6.02743	1.66582e-09	1.01534e-08
FBgn0030345	CG1847	uncharacterized protein	653.333	-0.48544	0.0963913	-5.03614	4.75018e-07	2.05969e-06
FBgn0030352	sicily	severe impairment of CI with lengthened youth	721.908	-0.407324	0.146679	-2.77698	0.00548666	0.0114657
FBgn0030354	Upf1	Upf1	3844.25	-0.581323	0.22872	-2.54164	0.0110334	0.0215314
FBgn0030364	Lsm12	LSM12 homolog	2238.56	-0.739686	0.129586	-5.70805	1.14277e-08	6.20362e-08
FBgn0030373	moon	moonshiner	299.222	-1.83461	0.30252	-6.06443	1.32424e-09	8.21876e-09
FBgn0030376	CG2750	uncharacterized protein	12.3855	-2.25616	0.730022	-3.09053	0.00199797	0.00457333
FBgn0030406	CG1463	uncharacterized protein	1243.99	-0.895532	0.14921	-6.00182	1.95122e-09	1.18026e-08
FBgn0030407	Fpgs	Folylpolyglutamate synthase	262.154	-0.745102	0.150177	-4.96148	6.99592e-07	2.95182e-06
FBgn0030410	Aven	Apoptosis and caspase activation inhibitor	256.269	-0.369747	0.148333	-2.49268	0.0126784	0.0244413
FBgn0030411	CG2540	uncharacterized protein	272.472	-0.444991	0.197489	-2.25324	0.024244	0.0438958
FBgn0030418	CG4004	uncharacterized protein	441.033	-0.716642	0.175251	-4.08923	4.32808e-05	0.000136811
FBgn0030420	CG12717	uncharacterized protein	481.956	-0.721038	0.151629	-4.75529	1.98157e-06	7.83772e-06
FBgn0030421	Agpat1	1-Acylglycerol-3-phosphate O-acyltransferase 1	93.8739	-0.903824	0.23076	-3.91673	8.97569e-05	0.000267607
FBgn0030433	mRpL49	mitochondrial ribosomal protein L49	1264.74	-0.523647	0.209726	-2.49681	0.0125316	0.0242111
FBgn0030451	CG15717	uncharacterized protein	1655.59	-0.710191	0.180509	-3.93438	8.34114e-05	0.000250437
FBgn0030456	CG4332	uncharacterized protein	1333.98	-0.530411	0.168314	-3.15132	0.00162537	0.00379979
FBgn0030468	CG1622	uncharacterized protein	1679.1	-0.498494	0.151979	-3.28002	0.001038	0.00252181
FBgn0030474	CG15747	uncharacterized protein	534.215	-0.396076	0.105391	-3.75814	0.000171179	0.000485366
FBgn0030480	Tim9a	Tim9a	815.272	-1.05263	0.21798	-4.82901	1.37212e-06	5.56757e-06
FBgn0030481	CG1662	uncharacterized protein	1279.22	-0.823934	0.193799	-4.2515	2.12347e-05	7.07327e-05
FBgn0030486	Set2	SET domain containing 2	3714.76	-0.873855	0.33641	-2.59759	0.00938801	0.0186316
FBgn0030500	Ndc80	Ndc80	524.401	-0.746258	0.162108	-4.60348	4.15494e-06	1.55738e-05
FBgn0030501	NA	NA	1653.97	-1.63971	0.219281	-7.47768	7.56468e-14	8.36708e-13
FBgn0030504	CG2691	uncharacterized protein	8554.69	-1.17508	0.128937	-9.11356	7.97253e-20	1.69406e-18
FBgn0030506	DNAlig4	DNA ligase 4	345.615	-0.519204	0.1712	-3.03274	0.00242342	0.00544654
FBgn0030507	CG11164	uncharacterized protein	362.371	-0.651322	0.179902	-3.62042	0.00029412	0.000797916
FBgn0030512	Nadsyn	NAD synthetase	2025.25	-0.818599	0.139418	-5.87153	4.31784e-09	2.48441e-08
FBgn0030520	Pdcd4	Programmed cell death 4	12573.8	-0.629743	0.173046	-3.63916	0.000273525	0.000747668
FBgn0030545	CG11590	uncharacterized protein	701.232	-0.356395	0.117328	-3.0376	0.00238468	0.00536824
FBgn0030551	CG11674	uncharacterized protein	3826.37	-1.94084	0.500943	-3.87438	0.000106898	0.0003144
FBgn0030552	mRpL38	mitochondrial ribosomal protein L38	1522.45	-0.308054	0.0972722	-3.16693	0.00154059	0.00361386
FBgn0030572	mRpS25	mitochondrial ribosomal protein S25	842.002	-0.70745	0.183833	-3.84832	0.00011893	0.000346496
FBgn0030573	nmdyn-D6	nmdyn-D6	115.012	-0.48317	0.187986	-2.57024	0.0101627	0.0200311
FBgn0030596	CG12398	uncharacterized protein	92.2341	-0.986431	0.42007	-2.34826	0.0188616	0.0350311
FBgn0030598	CG9503	uncharacterized protein	116.441	-2.32667	0.262977	-8.84742	8.95636e-19	1.75556e-17
FBgn0030603	CG5541	uncharacterized protein	1990.08	-0.365952	0.106963	-3.42129	0.000623257	0.00158932
FBgn0030607	dob	doppelganger von brummer	901.734	-0.752531	0.160821	-4.67932	2.87828e-06	1.11113e-05
FBgn0030611	CG15027	uncharacterized protein	896.383	-1.12466	0.300995	-3.73648	0.000186611	0.000525038
FBgn0030612	CG5599	uncharacterized protein	903.537	-0.904257	0.166392	-5.43449	5.49525e-08	2.73175e-07
FBgn0030616	RpL37a	Ribosomal protein L37a	39349	-0.462124	0.142626	-3.24011	0.00119483	0.00286407
FBgn0030625	CG5877	uncharacterized protein	517.97	-0.345278	0.152544	-2.26347	0.0236068	0.0428235
FBgn0030628	CG9114	uncharacterized protein	538.094	-0.821678	0.154568	-5.31596	1.06098e-07	5.05126e-07
FBgn0030629	CG9123	uncharacterized protein	244.009	-1.13157	0.204983	-5.52029	3.38444e-08	1.73825e-07
FBgn0030630	CG12608	uncharacterized protein	1979.73	-0.835056	0.111944	-7.45959	8.67904e-14	9.48949e-13
FBgn0030655	CG9213	uncharacterized protein	707.311	-0.578006	0.150456	-3.84169	0.000122188	0.00035557
FBgn0030657	cerv	cervantes	365.888	-0.626887	0.210348	-2.98024	0.00288025	0.00638864
FBgn0030658	CG7872	uncharacterized protein	1292.21	-0.425265	0.128016	-3.32197	0.000893841	0.00220444
FBgn0030659	CG9215	uncharacterized protein	641.19	-0.490723	0.127057	-3.86223	0.000112358	0.000328896
FBgn0030660	CG8097	uncharacterized protein	425.208	-0.415189	0.168086	-2.4701	0.0135077	0.025919
FBgn0030662	CG9220	uncharacterized protein	864.781	-1.31895	0.120748	-10.9232	8.92628e-28	3.67371e-26
FBgn0030672	CG9281	uncharacterized protein	14377.5	-0.909055	0.17456	-5.20769	1.91204e-07	8.75973e-07
FBgn0030673	CG15601	uncharacterized protein	140.744	-0.376348	0.161668	-2.3279	0.0199173	0.0367932
FBgn0030675	CG8191	uncharacterized protein	286.188	-0.512404	0.162789	-3.14766	0.00164582	0.00384107
FBgn0030676	CG12379	uncharacterized protein	141.859	-1.33302	0.239567	-5.56427	2.63246e-08	1.37367e-07
FBgn0030678	CG11679	uncharacterized protein	658.95	-0.412227	0.108325	-3.80547	0.000141533	0.000407368
FBgn0030680	CG8944	uncharacterized protein	946.592	-0.832798	0.112824	-7.38137	1.56664e-13	1.65735e-12
FBgn0030687	RpIIIC160	RNA polymerase III subunit C160	1686.05	-0.86765	0.128884	-6.73201	1.67333e-11	1.35044e-10
FBgn0030692	mRpS30	mitochondrial ribosomal protein S30	2997.84	-0.536404	0.0994516	-5.39362	6.90522e-08	3.38244e-07
FBgn0030700	CG15914	uncharacterized protein	194.011	-0.45906	0.149036	-3.08019	0.00206872	0.0047248
FBgn0030710	CG8924	uncharacterized protein	616.926	-0.964259	0.118221	-8.15643	3.45078e-16	5.1566e-15
FBgn0030711	Rrp47	Ribosomal RNA processing 47	771.16	-0.8404	0.223003	-3.76856	0.000164191	0.000467235
FBgn0030720	CG8939	uncharacterized protein	5234.57	-1.11104	0.161465	-6.88102	5.94265e-12	5.11589e-11
FBgn0030721	CG12698	uncharacterized protein	8.58359	-1.33383	0.542959	-2.45659	0.0140263	0.0267856
FBgn0030723	dpr18	defective proboscis extension response 18	37.1261	-1.35831	0.365986	-3.71137	0.000206142	0.000575283
FBgn0030725	CG8958	uncharacterized protein	19.3797	-1.52571	0.390598	-3.9061	9.37978e-05	0.000279118
FBgn0030738	CG9915	uncharacterized protein	1617.39	-0.368315	0.126952	-2.90121	0.00371725	0.00805903
FBgn0030739	SWIP	Strumpellin and WASH-interacting protein	527.154	-0.435286	0.147111	-2.9589	0.00308739	0.00681758
FBgn0030744	CG9992	uncharacterized protein	1427.19	-1.27651	0.152143	-8.39017	4.85453e-17	8.15983e-16
FBgn0030753	rngo	rings lost	2550.16	-0.731263	0.0987253	-7.40704	1.29148e-13	1.37684e-12
FBgn0030757	CG9902	uncharacterized protein	216.061	-1.15823	0.227321	-5.09511	3.4853e-07	1.54255e-06
FBgn0030768	CG9723	uncharacterized protein	674.711	-0.56579	0.0909778	-6.219	5.00343e-10	3.28994e-09
FBgn0030778	CG4678	uncharacterized protein	29.2768	-0.708437	0.309827	-2.28656	0.0222216	0.0405361
FBgn0030787	CG9609	uncharacterized protein	512.106	-1.19951	0.215858	-5.55692	2.74573e-08	1.42916e-07
FBgn0030789	Rrp45	Rrp45	1190.51	-0.718898	0.150963	-4.76209	1.91596e-06	7.60004e-06
FBgn0030790	CG4768	uncharacterized protein	2003.43	-0.290046	0.0758797	-3.82244	0.000132136	0.000382633
FBgn0030791	CG9132	uncharacterized protein	2259.85	-0.270767	0.0742102	-3.64865	0.000263622	0.00072331
FBgn0030793	CG9125	uncharacterized protein	602.459	-0.331146	0.115261	-2.87301	0.0040658	0.00874126
FBgn0030794	CG13005	uncharacterized protein	609.928	-1.5281	0.325525	-4.69426	2.67572e-06	1.03876e-05
FBgn0030800	Nprl2	Nitrogen permease regulator-like 2	641.571	-0.334186	0.118443	-2.82148	0.0047802	0.0101364
FBgn0030801	Rcp	Receptor component protein	339.743	-0.701269	0.176193	-3.98012	6.88807e-05	0.000209861
FBgn0030803	CG4880	uncharacterized protein	691.224	-0.772442	0.206638	-3.73815	0.000185381	0.00052217
FBgn0030805	wus	wurst	400.711	-0.745734	0.106708	-6.98852	2.77794e-12	2.50642e-11
FBgn0030813	CG4949	uncharacterized protein	859.05	-1.65751	0.212467	-7.80123	6.13082e-15	7.86217e-14
FBgn0030833	CG8915	uncharacterized protein	816.191	-0.737641	0.145221	-5.07944	3.78556e-07	1.66414e-06
FBgn0030834	CG8675	uncharacterized protein	1928.77	-0.976702	0.190571	-5.12515	2.97306e-07	1.32722e-06
FBgn0030851	CG8326	uncharacterized protein	1111.65	-1.17094	0.227726	-5.14189	2.71995e-07	1.22171e-06
FBgn0030854	CG8289	uncharacterized protein	1573.25	-0.406925	0.0937286	-4.34152	1.41498e-05	4.84735e-05
FBgn0030855	CG5800	uncharacterized protein	2491.09	-0.934819	0.156767	-5.96309	2.47507e-09	1.48121e-08
FBgn0030864	CG8173	uncharacterized protein	1076.11	-1.5369	0.178235	-8.62291	6.52711e-18	1.17869e-16
FBgn0030870	CG6398	uncharacterized protein	2040.07	-0.332086	0.106896	-3.10664	0.0018923	0.00435883
FBgn0030871	CG8142	uncharacterized protein	1122.57	-0.825893	0.150716	-5.47981	4.25776e-08	2.16169e-07
FBgn0030873	CG15814	uncharacterized protein	1431.61	-0.27208	0.108817	-2.50035	0.012407	0.0240002
FBgn0030899	Hesr	HES-related	57.8083	-3.03082	0.829371	-3.65436	0.000257827	0.000708352
FBgn0030912	CG6023	uncharacterized protein	113.661	-0.750866	0.258618	-2.90337	0.00369166	0.00800635
FBgn0030931	Xrcc2	X-ray repair cross complementing 2	25.6326	-1.40388	0.411733	-3.40969	0.000650361	0.00164999
FBgn0030938	CG15047	uncharacterized protein	186.406	-1.17243	0.281039	-4.17176	3.02259e-05	9.80974e-05
FBgn0030943	Nup35	Nucleoporin 35kDa	976.504	-0.301562	0.111202	-2.71184	0.00669118	0.0137099
FBgn0030956	CG18259	uncharacterized protein	856.621	-0.766949	0.151944	-5.04757	4.47457e-07	1.94563e-06
FBgn0030963	CG7101	uncharacterized protein	246.945	-0.97611	0.177877	-5.48755	4.07538e-08	2.0759e-07
FBgn0030969	Usp39	Ubiquitin specific protease 39	907.472	-0.660357	0.10225	-6.45826	1.05916e-10	7.64178e-10
FBgn0030970	CG7326	uncharacterized protein	572.059	-0.746691	0.163138	-4.57706	4.71547e-06	1.75106e-05
FBgn0031003	CG7889	uncharacterized protein	1135.24	-0.546251	0.124615	-4.3835	1.16785e-05	4.04341e-05
FBgn0031008	CG8010	uncharacterized protein	2526.11	-1.10682	0.255311	-4.33517	1.45646e-05	4.97317e-05
FBgn0031018	CG12200	uncharacterized protein	61.7199	-1.81416	0.445606	-4.07121	4.677e-05	0.00014668
FBgn0031022	CG12204	uncharacterized protein	228.681	-0.396411	0.175837	-2.25443	0.0241691	0.0437858
FBgn0031030	Tao	Tao	6116.32	-0.491728	0.189146	-2.59973	0.00932984	0.0185221
FBgn0031036	CG14220	uncharacterized protein	709.607	-0.581132	0.118838	-4.89012	1.00773e-06	4.16959e-06
FBgn0031039	Shawn	shawn	799.593	-0.452015	0.133168	-3.39433	0.000687963	0.00173574
FBgn0031040	CG14210	uncharacterized protein	1494.62	-1.3016	0.235687	-5.52256	3.34087e-08	1.71729e-07
FBgn0031041	CG12788	uncharacterized protein	665.85	-0.720904	0.107697	-6.69379	2.1746e-11	1.71744e-10
FBgn0031043	Naa20A	N(alpha)-acetyltransferase 20 A	1716.72	-0.811199	0.16881	-4.80539	1.54453e-06	6.21829e-06
FBgn0031044	MKP-4	MAPK Phosphatase 4	936.372	-1.04227	0.134573	-7.74502	9.5565e-15	1.19582e-13
FBgn0031049	Sec61gamma	Sec61 gamma subunit	2930.63	-0.639818	0.218919	-2.92262	0.00347095	0.00757944
FBgn0031053	CG14223	uncharacterized protein	300.684	-1.78108	0.457729	-3.89112	9.97818e-05	0.000295222
FBgn0031062	CG14230	uncharacterized protein	1907.58	-0.871008	0.180978	-4.81278	1.48841e-06	6.00602e-06
FBgn0031091	Phf7	PHD finger protein 7	736.071	-1.1622	0.0985822	-11.7891	4.44207e-32	2.43488e-30
FBgn0031094	CG9578	uncharacterized protein	732.084	-0.386271	0.115887	-3.33318	0.000858597	0.00212641
FBgn0031115	CG11710	uncharacterized protein	964.17	-0.347722	0.109419	-3.17788	0.00148354	0.00348863
FBgn0031117	GstT3	Glutathione S transferase T3	917.556	-0.487171	0.160213	-3.04076	0.00235978	0.00531702
FBgn0031119	CG1812	uncharacterized protein	1015.09	-0.507084	0.0975867	-5.19624	2.03364e-07	9.28591e-07
FBgn0031126	Cyp6v1	Cyp6v1	2058.1	-1.19496	0.23546	-5.075	3.87497e-07	1.70163e-06
FBgn0031144	CG1529	uncharacterized protein	892.71	-0.374602	0.125156	-2.99309	0.00276171	0.00614662
FBgn0031145	Ntf-2	Nuclear transport factor-2	4412.75	-0.620506	0.203898	-3.04322	0.00234062	0.00527961
FBgn0031148	Cbs	Cystathionine beta-synthase	3543.02	-0.576511	0.221104	-2.60742	0.00912265	0.0181399
FBgn0031149	Stt3A	Catalytic subunit 3A of the oligosaccharyltransferase complex	6884.93	-0.779868	0.109386	-7.1295	1.00736e-12	9.6588e-12
FBgn0031171	CG1801	uncharacterized protein	373.395	-2.6789	0.434923	-6.15948	7.29835e-10	4.69536e-09
FBgn0031182	Cyp6t1	Cyp6t1	148.005	-0.90099	0.244242	-3.68892	0.000225204	0.000624402
FBgn0031188	CG14613	uncharacterized protein	1363.27	-0.55662	0.0912507	-6.0999	1.06133e-09	6.66367e-09
FBgn0031189	CG14618	uncharacterized protein	698.736	-0.526358	0.214854	-2.44983	0.0142922	0.0272346
FBgn0031191	Cp110	Centriolar coiled coil protein 110kDa	475.501	-0.461823	0.144725	-3.19105	0.00141757	0.00334909
FBgn0031195	CG17600	uncharacterized protein	583.468	-0.51242	0.108184	-4.73658	2.1736e-06	8.55353e-06
FBgn0031217	CG11377	uncharacterized protein	1071.37	-0.799448	0.13524	-5.91134	3.39341e-09	1.99325e-08
FBgn0031227	CG3709	uncharacterized protein	657.113	-1.6068	0.274648	-5.85038	4.90459e-09	2.79219e-08
FBgn0031229	CG3436	uncharacterized protein	2067.69	-0.783787	0.158887	-4.93299	8.09803e-07	3.39947e-06
FBgn0031231	mRpL10	mitochondrial ribosomal protein L10	1258.99	-0.832946	0.239341	-3.48016	0.000501113	0.00130088
FBgn0031233	Tbc1d15-17	TBC1 domain family member 15/17	848.07	-0.599753	0.112497	-5.3313	9.75135e-08	4.66228e-07
FBgn0031238	CG3645	uncharacterized protein	818.333	-0.55455	0.124687	-4.44752	8.6867e-06	3.07769e-05
FBgn0031239	CG17075	uncharacterized protein	88.4088	-1.09356	0.396308	-2.75937	0.00579122	0.0120392
FBgn0031247	CG11562	uncharacterized protein	482.206	-0.593531	0.187054	-3.17305	0.00150848	0.00354324
FBgn0031252	CG13690	uncharacterized protein	651.732	-1.41101	0.252806	-5.58138	2.38611e-08	1.2488e-07
FBgn0031253	CG11885	uncharacterized protein	486.447	-1.07203	0.203649	-5.26411	1.40872e-07	6.568e-07
FBgn0031265	CG2794	uncharacterized protein	1208.74	-1.00237	0.167239	-5.99366	2.05167e-09	1.238e-08
FBgn0031266	Sf3b1	Splicing factor 3b subunit 1	3113.12	-0.527036	0.16686	-3.15856	0.00158549	0.00371147
FBgn0031273	CG2839	uncharacterized protein	27.2734	-1.58777	0.564243	-2.81398	0.00489328	0.0103603
FBgn0031281	Saf6	SAGA factor-like TAF6	363.568	-0.371625	0.12761	-2.91219	0.00358902	0.00781111
FBgn0031305	Iris	iris	655.095	-1.50279	0.452726	-3.31943	0.000902021	0.00222152
FBgn0031309	Tfb4	Transcription factor B4	334.222	-0.657218	0.130019	-5.05478	4.30893e-07	1.87624e-06
FBgn0031320	CG5126	uncharacterized protein	667.915	-0.493109	0.136102	-3.62308	0.000291114	0.000790514
FBgn0031321	Tgt	tRNA-guanine transglycosylase	695.395	-0.404917	0.177018	-2.28743	0.0221706	0.040467
FBgn0031361	CG17652	uncharacterized protein	290.521	-0.839671	0.216931	-3.87069	0.000108529	0.000318895
FBgn0031384	CG4238	uncharacterized protein	1394.8	-0.930662	0.146347	-6.3593	2.02673e-10	1.40893e-09
FBgn0031390	tho2	tho2	3205.5	-0.41197	0.127347	-3.23503	0.0012163	0.00291048
FBgn0031391	CG11723	uncharacterized protein	563.798	-0.460807	0.122247	-3.76947	0.000163592	0.00046599
FBgn0031392	AIF	Apoptosis inducing factor	3844.98	-0.993075	0.140242	-7.08114	1.42974e-12	1.34792e-11
FBgn0031398	CG10880	uncharacterized protein	754.593	-0.991902	0.145337	-6.82483	8.80265e-12	7.37304e-11
FBgn0031399	mio	missing oocyte	859.344	-0.457242	0.140218	-3.26094	0.00111043	0.00268409
FBgn0031401	papi	papi	1841.54	-0.504354	0.0869944	-5.79755	6.72907e-09	3.76512e-08
FBgn0031403	CG15387	uncharacterized protein	187.203	-0.583073	0.222814	-2.61686	0.00887422	0.0177141
FBgn0031419	CG15390	uncharacterized protein	140.508	-0.871875	0.186462	-4.67588	2.92692e-06	1.12815e-05
FBgn0031422	PIG-Wa	Phosphatidylinositol glycan anchor biosynthesis class W a	121.181	-0.526547	0.170055	-3.09633	0.00195932	0.004494
FBgn0031434	insv	insensitive	226.584	-0.58999	0.129348	-4.56125	5.08496e-06	1.87645e-05
FBgn0031435	Elba2	Early boundary activity 2	415.973	-1.4775	0.316673	-4.66569	3.0758e-06	1.18076e-05
FBgn0031452	Cwc25	Cwc25	733.412	-0.554536	0.180438	-3.07328	0.00211723	0.0048267
FBgn0031465	CG3123	uncharacterized protein	10.5255	-3.37502	0.797625	-4.23133	2.3231e-05	7.70717e-05
FBgn0031479	Prx6005	Peroxiredoxin 6005	997.245	-0.83958	0.205857	-4.07846	4.53359e-05	0.000142471
FBgn0031485	CG9643	uncharacterized protein	957.477	-0.789298	0.212302	-3.71781	0.000200954	0.000562326
FBgn0031492	CG3542	uncharacterized protein	1585.77	-0.307089	0.113725	-2.70027	0.00692831	0.0141327
FBgn0031493	Sf3b2	Splicing factor 3b subunit 2	2384.19	-0.470991	0.112049	-4.20343	2.62902e-05	8.63424e-05
FBgn0031494	CG17219	uncharacterized protein	483.341	-1.22535	0.189687	-6.45986	1.04802e-10	7.56576e-10
FBgn0031497	SerRS	Seryl-tRNA synthetase	6260.55	-0.356059	0.14274	-2.49446	0.0126148	0.0243414
FBgn0031500	CG17221	uncharacterized protein	476.844	-0.398912	0.137815	-2.89455	0.00379697	0.00821318
FBgn0031501	CG17261	uncharacterized protein	113.974	-2.48136	0.398708	-6.2235	4.86192e-10	3.2054e-09
FBgn0031519	Fign	Fidgetin	151.828	-0.978701	0.182751	-5.35539	8.53712e-08	4.1183e-07
FBgn0031526	CG8838	uncharacterized protein	9.61253	-2.20043	0.748261	-2.94072	0.00327446	0.00719348
FBgn0031540	Pif1	Pif1 ortholog	927.295	-1.2398	0.154016	-8.04979	8.29374e-16	1.18504e-14
FBgn0031549	Spindly	spindly	493.264	-0.928463	0.211711	-4.38552	1.15709e-05	4.00952e-05
FBgn0031566	CG2818	uncharacterized protein	1252.78	-0.294393	0.113673	-2.58982	0.00960261	0.0190149
FBgn0031573	CG3407	uncharacterized protein	242.145	-0.673296	0.119379	-5.63999	1.7006e-08	9.06891e-08
FBgn0031574	TTLL4B	Tubulin tyrosine ligase-like 4B	338.859	-0.994458	0.19726	-5.04137	4.62219e-07	2.0077e-06
FBgn0031575	Cep97	Centrosomal protein 97kDa	581.43	-0.803225	0.135005	-5.94962	2.68769e-09	1.59919e-08
FBgn0031597	CG17612	uncharacterized protein	214.576	-0.617287	0.168867	-3.65546	0.000256719	0.000705777
FBgn0031601	Dim1	Dim1	449.098	-0.492757	0.164362	-2.998	0.00271755	0.00605595
FBgn0031604	Elp3	Elongator complex protein 3	1413.13	-0.836982	0.152393	-5.49227	3.9679e-08	2.02531e-07
FBgn0031608	CG15435	uncharacterized protein	219.196	-0.720422	0.173888	-4.14303	3.42752e-05	0.00011
FBgn0031610	CG15436	uncharacterized protein	206.276	-0.767348	0.212227	-3.6157	0.000299541	0.000811263
FBgn0031628	CG3294	uncharacterized protein	220.288	-0.55046	0.176657	-3.11597	0.00183339	0.00423811
FBgn0031631	CG3225	uncharacterized protein	171.454	-1.13716	0.169669	-6.7022	2.05307e-11	1.62826e-10
FBgn0031639	mRpS2	mitochondrial ribosomal protein S2	1214.23	-0.58354	0.150916	-3.86666	0.000110335	0.000323511
FBgn0031640	Mon1	Monensin sensitivity 1	667.156	-0.175578	0.0750733	-2.33875	0.0193485	0.0358493
FBgn0031655	Marcal1	Marcal1	404.698	-0.591661	0.113105	-5.23107	1.68527e-07	7.78999e-07
FBgn0031657	CG3756	uncharacterized protein	1504.64	-1.05119	0.183316	-5.73428	9.79264e-09	5.34882e-08
FBgn0031662	CG3792	uncharacterized protein	1346.07	-0.444558	0.173091	-2.56835	0.0102185	0.0201187
FBgn0031663	CG8891	uncharacterized protein	1101.98	-1.2115	0.176544	-6.86231	6.77581e-12	5.78489e-11
FBgn0031677	CG14036	uncharacterized protein	743.433	-2.68742	0.340113	-7.90155	2.75451e-15	3.70901e-14
FBgn0031711	CG6907	uncharacterized protein	1737.15	-0.523779	0.110713	-4.73095	2.23476e-06	8.77473e-06
FBgn0031716	CG14015	uncharacterized protein	11.6474	-1.32993	0.566533	-2.34748	0.0189008	0.0350934
FBgn0031735	CG11029	uncharacterized protein	35.7897	-1.30834	0.53397	-2.45021	0.0142772	0.0272101
FBgn0031736	CG11030	uncharacterized protein	2637.64	-0.715679	0.110136	-6.49815	8.13158e-11	5.96765e-10
FBgn0031739	CG14005	uncharacterized protein	452.487	-0.534385	0.18324	-2.91632	0.00354186	0.00771931
FBgn0031740	CG7239	uncharacterized protein	664.959	-0.379036	0.0873739	-4.33809	1.43725e-05	4.91433e-05
FBgn0031756	CG13992	uncharacterized protein	932.719	-1.87734	0.501872	-3.74067	0.000183529	0.000517304
FBgn0031762	CG9098	uncharacterized protein	407.898	-1.48051	0.295914	-5.00317	5.6395e-07	2.41154e-06
FBgn0031764	CG9107	uncharacterized protein	1325.68	-0.733358	0.168785	-4.34493	1.39321e-05	4.77959e-05
FBgn0031769	CG9135	uncharacterized protein	2091.77	-0.212238	0.0634879	-3.34297	0.00082886	0.00206018
FBgn0031772	CG13994	uncharacterized protein	344.799	-0.37782	0.146722	-2.57508	0.0100215	0.0197812
FBgn0031776	Pfdn1	Prefoldin 1	1414.77	-0.591191	0.256165	-2.30785	0.0210073	0.0385824
FBgn0031777	CG9154	uncharacterized protein	564.271	-0.949305	0.210886	-4.5015	6.74746e-06	2.43483e-05
FBgn0031782	WDR79	WD repeat domain 79	797.896	-0.452896	0.154336	-2.93449	0.00334097	0.0073279
FBgn0031805	Nepl4	Neprilysin-like 4	656.038	-2.25878	0.380433	-5.93738	2.89621e-09	1.71666e-08
FBgn0031817	HemK1	HemK methyltransferase 1	309.119	-0.496034	0.128996	-3.84535	0.000120378	0.000350469
FBgn0031820	Daxx	Daxx-like protein	1936.39	-0.479043	0.160028	-2.9935	0.00275794	0.00614152
FBgn0031822	Phf5a	PHD finger protein 5a	716.367	-1.08625	0.188991	-5.74762	9.05094e-09	4.9744e-08
FBgn0031832	CG9596	uncharacterized protein	1310.36	-0.838178	0.18695	-4.48344	7.34492e-06	2.63583e-05
FBgn0031834	CG13766	uncharacterized protein	310.623	-0.749052	0.156377	-4.79003	1.66758e-06	6.67678e-06
FBgn0031844	CG13771	uncharacterized protein	13.1584	-1.4315	0.468344	-3.05651	0.00223933	0.00507424
FBgn0031848	Nse1	Non-SMC element 1	197.042	-1.07963	0.159832	-6.75475	1.43086e-11	1.16385e-10
FBgn0031851	Aatf	Apoptosis antagonizing transcription factor	1838.61	-1.08156	0.16667	-6.48924	8.62682e-11	6.29872e-10
FBgn0031866	Nlg2	Neuroligin 2	46.1251	-0.972883	0.267652	-3.63488	0.000278106	0.000759183
FBgn0031868	Rat1	Rat1 5'-3' exoribonuclease	3135.74	-0.94932	0.194321	-4.88531	1.03268e-06	4.26004e-06
FBgn0031872	ihog	interference hedgehog	625.66	-0.395383	0.121149	-3.2636	0.00110006	0.0026611
FBgn0031873	Gas41	Gas41	359.208	-0.55577	0.225782	-2.46153	0.0138346	0.0264724
FBgn0031874	CG13775	uncharacterized protein	139.196	-0.770138	0.139755	-5.51063	3.57554e-08	1.83411e-07
FBgn0031875	CG3430	uncharacterized protein	780.931	-0.849529	0.111838	-7.59609	3.05217e-14	3.60441e-13
FBgn0031876	Atac1	Ada2a-containing complex component 1	163.029	-1.04996	0.155466	-6.75363	1.44186e-11	1.17127e-10
FBgn0031877	Hmgcl	3-Hydroxymethyl-3-methylglutaryl-CoA lyase	343.447	-1.14901	0.212379	-5.41017	6.29642e-08	3.10757e-07
FBgn0031878	sip2	septin interacting protein 2	940.819	-0.625985	0.181037	-3.45777	0.000544672	0.00140075
FBgn0031881	MME1	Mitochondrial Magnesium Exporter 1	469.44	-0.769284	0.1486	-5.17688	2.25626e-07	1.02383e-06
FBgn0031885	Mnn1	Menin 1	1315.23	-0.487434	0.118904	-4.0994	4.14217e-05	0.000131337
FBgn0031886	Nuf2	Nuf2	476.112	-1.21573	0.157925	-7.69817	1.38031e-14	1.69636e-13
FBgn0031895	CG4497	uncharacterized protein	630.837	-0.835551	0.186622	-4.47724	7.56147e-06	2.7057e-05
FBgn0031904	CG5149	uncharacterized protein	1773.13	-1.00228	0.144138	-6.95362	3.56025e-12	3.14806e-11
FBgn0031947	CG7154	uncharacterized protein	1528.73	-0.338836	0.126397	-2.68073	0.00734619	0.0149163
FBgn0031948	CG7149	uncharacterized protein	686.527	-1.41214	0.187769	-7.52063	5.45125e-14	6.12796e-13
FBgn0031951	r2d2	r2d2	992.427	-0.449056	0.177138	-2.53507	0.0112424	0.0219083
FBgn0031952	cdc14	cell division cycle 14	1704.98	-0.391247	0.09176	-4.26381	2.00967e-05	6.71696e-05
FBgn0031961	CG7102	uncharacterized protein	173.351	-2.37762	0.26456	-8.98709	2.53871e-19	5.1897e-18
FBgn0031980	RpL36A	Ribosomal protein L36A	41983.8	-0.825681	0.265212	-3.11329	0.00185013	0.00427363
FBgn0031999	CG8419	uncharacterized protein	46.5652	-1.58479	0.311013	-5.09559	3.47651e-07	1.53921e-06
FBgn0032014	CG7840	uncharacterized protein	1287.47	-1.58038	0.303024	-5.21537	1.83454e-07	8.42652e-07
FBgn0032016	Mettl14	Methyltransferase like 14	468.919	-0.378558	0.097708	-3.87438	0.000106897	0.0003144
FBgn0032020	strat	stratum	486.443	-0.673067	0.188606	-3.56865	0.000358824	0.000955939
FBgn0032022	CG14275	uncharacterized protein	944.409	-1.41373	0.305454	-4.62829	3.68698e-06	1.39124e-05
FBgn0032026	CG7627	uncharacterized protein	8367.56	-0.804062	0.175455	-4.58273	4.58951e-06	1.70633e-05
FBgn0032029	CG17292	uncharacterized protein	924.226	-0.691805	0.111459	-6.20682	5.40681e-10	3.54765e-09
FBgn0032031	CG13390	uncharacterized protein	430.415	-0.399749	0.140495	-2.84528	0.00443718	0.00947067
FBgn0032033	CG13392	uncharacterized protein	398.9	-0.780593	0.143866	-5.42583	5.76866e-08	2.85963e-07
FBgn0032034	Rcd4	Reduction in Cnn dots 4	257.509	-0.611323	0.204389	-2.99099	0.00278078	0.00618684
FBgn0032047	CG13088	uncharacterized protein	191.278	-1.36207	0.249646	-5.45599	4.8702e-08	2.44457e-07
FBgn0032050	CG13096	uncharacterized protein	6970.64	-0.977178	0.151882	-6.43381	1.24442e-10	8.87501e-10
FBgn0032051	CG13097	uncharacterized protein	3010.89	-1.28873	0.171122	-7.5311	5.03138e-14	5.69497e-13
FBgn0032053	mRpL51	mitochondrial ribosomal protein L51	1103.5	-0.96456	0.199424	-4.83672	1.31997e-06	5.36829e-06
FBgn0032054	Uba4	Ubiquitin activating enzyme 4	876.423	-0.501584	0.134964	-3.71644	0.000202052	0.000565016
FBgn0032077	CG9515	uncharacterized protein	357.079	-0.91384	0.175804	-5.19805	2.01389e-07	9.20384e-07
FBgn0032105	borr	borealin-related	751.001	-0.433339	0.1005	-4.31182	1.61919e-05	5.48347e-05
FBgn0032120	CG33298	uncharacterized protein	1935.79	-0.520192	0.149528	-3.47889	0.0005035	0.0013068
FBgn0032130	brwl	brickwall	1157.11	-0.579189	0.0959501	-6.03636	1.57632e-09	9.64797e-09
FBgn0032138	CG4364	uncharacterized protein	10935.8	-0.782216	0.144469	-5.41443	6.14829e-08	3.03688e-07
FBgn0032150	CG13123	uncharacterized protein	142.609	-0.789271	0.202041	-3.90649	9.36466e-05	0.000278735
FBgn0032153	CG4537	uncharacterized protein	121.726	-1.03891	0.289789	-3.58504	0.000337026	0.000903245
FBgn0032154	mtDNA-helicase	mitochondrial DNA helicase	799.752	-1.39977	0.160955	-8.69668	3.41743e-18	6.35662e-17
FBgn0032157	Etl1	Etl1	1742.76	-0.473192	0.138505	-3.41642	0.000634509	0.00161535
FBgn0032161	CG4594	uncharacterized protein	277.928	-0.439926	0.11623	-3.78496	0.000153735	0.000440036
FBgn0032166	CG4619	uncharacterized protein	1442.93	-0.918457	0.0974059	-9.42918	4.13314e-21	9.84642e-20
FBgn0032168	CG13126	uncharacterized protein	766.763	-1.01271	0.154786	-6.54268	6.04277e-11	4.52861e-10
FBgn0032169	CG4709	uncharacterized protein	442.134	-0.542393	0.105988	-5.11751	3.09595e-07	1.3781e-06
FBgn0032170	CG4658	uncharacterized protein	1588.49	-0.36875	0.116529	-3.16445	0.00155378	0.00364137
FBgn0032189	Ripalpha	RPA-interacting protein alpha	454.773	-0.866873	0.119607	-7.24769	4.23932e-13	4.24549e-12
FBgn0032194	CG4901	uncharacterized protein	1876.44	-1.07811	0.111405	-9.67745	3.75967e-22	9.72333e-21
FBgn0032195	CG4908	uncharacterized protein	561.67	-0.839097	0.142056	-5.9068	3.48812e-09	2.04306e-08
FBgn0032197	CG5694	uncharacterized protein	1272.46	-0.894073	0.163443	-5.47024	4.49437e-08	2.27065e-07
FBgn0032198	eEF1delta	eukaryotic translation elongation factor 1 delta	13981.4	-1.04868	0.214415	-4.89091	1.00373e-06	4.15719e-06
FBgn0032205	CG4957	uncharacterized protein	370.442	-1.11639	0.231199	-4.82871	1.3742e-06	5.57237e-06
FBgn0032208	Ufd4	Ubiquitin fusion-degradation 4-like	10760.5	-0.504952	0.191492	-2.63694	0.00836579	0.0168157
FBgn0032216	Usp14	Ubiquitin specific protease 14	3810.85	-0.21545	0.0749685	-2.87387	0.00405472	0.0087235
FBgn0032228	CG5367	uncharacterized protein	569.249	-1.35699	0.242255	-5.60148	2.12525e-08	1.12032e-07
FBgn0032229	CG5045	uncharacterized protein	1739.09	-0.657726	0.192276	-3.42075	0.000624487	0.00159205
FBgn0032231	CG5056	uncharacterized protein	461.957	-0.56104	0.2264	-2.47809	0.0132089	0.0253969
FBgn0032234	gny	garnysstan	305.218	-0.343821	0.0997528	-3.44673	0.000567422	0.00145653
FBgn0032236	mRpS7	mitochondrial ribosomal protein S7	1607.95	-0.755246	0.195901	-3.85525	0.000115611	0.000337622
FBgn0032240	CG17768	uncharacterized protein	1173.71	-0.632218	0.260282	-2.42897	0.0151417	0.0287472
FBgn0032242	CG5355	uncharacterized protein	6192.23	-0.388107	0.0908243	-4.27316	1.92723e-05	6.4578e-05
FBgn0032243	Klp31E	Kinesin-like protein at 31E	496.002	-0.419732	0.134727	-3.11542	0.00183681	0.00424523
FBgn0032244	RfC3	Replication factor C subunit 3	796.66	-1.20817	0.176349	-6.85101	7.33318e-12	6.22215e-11
FBgn0032247	CG5188	uncharacterized protein	448.724	-0.562093	0.192527	-2.91955	0.0035054	0.00764657
FBgn0032248	Bug22	Basal body up regulated gene 22	666.753	-1.02249	0.209329	-4.88464	1.0362e-06	4.27312e-06
FBgn0032250	holn1	hole-in-one	404.236	-0.909427	0.200251	-4.54143	5.58732e-06	2.0472e-05
FBgn0032256	RluA-2	RluA pseudouridine synthase 2	549.148	-1.08204	0.175248	-6.17432	6.64472e-10	4.30067e-09
FBgn0032259	CG6144	uncharacterized protein	523.845	-0.746845	0.104194	-7.16784	7.61919e-13	7.44373e-12
FBgn0032261	CG6094	uncharacterized protein	663.398	-0.387471	0.170005	-2.27917	0.022657	0.0412692
FBgn0032262	CG7384	uncharacterized protein	720.375	-1.62319	0.340553	-4.76635	1.87589e-06	7.45301e-06
FBgn0032292	EMC3	ER Membrane protein Complex 3	1180.07	-0.186416	0.0809612	-2.30254	0.0213049	0.0390668
FBgn0032298	CG6724	uncharacterized protein	2758.85	-0.928488	0.160092	-5.79971	6.64285e-09	3.71855e-08
FBgn0032299	CG17127	uncharacterized protein	51.2297	-1.01505	0.424714	-2.38996	0.0168504	0.0316133
FBgn0032321	YL-1	YL-1	621.152	-0.310853	0.0840751	-3.69733	0.000217882	0.000605727
FBgn0032329	Art8	Arginine methyltransferase 8	777.034	-1.59407	0.33337	-4.7817	1.73822e-06	6.93944e-06
FBgn0032339	Wdr59	WD repeat domain 59	809.878	-1.00585	0.180972	-5.55806	2.72793e-08	1.4205e-07
FBgn0032343	CG6201	uncharacterized protein	159.687	-0.65207	0.255699	-2.55015	0.0107678	0.0210663
FBgn0032345	CG14921	uncharacterized protein	36.9063	-0.913067	0.269899	-3.383	0.000716996	0.00180421
FBgn0032346	Csl4	Csl4	1086.54	-1.2855	0.222408	-5.77992	7.47346e-09	4.15162e-08
FBgn0032350	CG6287	uncharacterized protein	6994.81	-0.864841	0.178333	-4.84958	1.23726e-06	5.04515e-06
FBgn0032354	CG4788	uncharacterized protein	305.526	-0.666148	0.148685	-4.48026	7.45524e-06	2.67155e-05
FBgn0032363	Dlg5	Discs large 5	3782.73	-0.478424	0.152216	-3.14307	0.00167187	0.00389433
FBgn0032374	CG14931	uncharacterized protein	353.959	-2.07181	0.371813	-5.57219	2.5156e-08	1.31435e-07
FBgn0032382	Mal-B2	Maltase B2	444.828	-0.897698	0.277963	-3.22956	0.00123981	0.002961
FBgn0032388	CG6686	uncharacterized protein	2504.43	-0.532899	0.112712	-4.72797	2.26775e-06	8.90144e-06
FBgn0032390	dgt2	dim gamma-tubulin 2	610.071	-0.672799	0.145228	-4.6327	3.60925e-06	1.36357e-05
FBgn0032397	Tom70	Translocase of outer membrane 70	2364.63	-0.395994	0.159182	-2.48769	0.0128577	0.02476
FBgn0032399	CG6785	uncharacterized protein	112.986	-1.45514	0.24862	-5.85288	4.83123e-09	2.75549e-08
FBgn0032401	Plzf	Promyelocytic leukemia zinc finger	94.2295	-1.09733	0.204931	-5.35466	8.57176e-08	4.13179e-07
FBgn0032404	RpL7-like	Ribosomal protein L7-like	3688.26	-0.934371	0.229141	-4.0777	4.54825e-05	0.000142895
FBgn0032408	CG6712	uncharacterized protein	2268.96	-1.19622	0.186056	-6.42934	1.28156e-10	9.11362e-10
FBgn0032430	CG6388	uncharacterized protein	1696.44	-0.665347	0.153562	-4.33276	1.47255e-05	5.02256e-05
FBgn0032444	CCT4	Chaperonin containing TCP1 subunit 4	12842.7	-0.691392	0.12963	-5.33358	9.62952e-08	4.60937e-07
FBgn0032445	CG6153	uncharacterized protein	374.395	-0.468243	0.117918	-3.97092	7.15965e-05	0.000217493
FBgn0032446	IFT43	Intraflagellar transport 43	153.705	-1.33054	0.224501	-5.92662	3.09225e-09	1.82849e-08
FBgn0032450	CG5776	uncharacterized protein	1302.36	-1.37885	0.220332	-6.25806	3.89797e-10	2.61211e-09
FBgn0032453	CG6180	uncharacterized protein	4556.38	-0.619763	0.15974	-3.87981	0.000104538	0.000308118
FBgn0032454	CG5787	uncharacterized protein	3710.26	-0.681335	0.136365	-4.9964	5.84109e-07	2.49601e-06
FBgn0032455	Pih1D1	PIH1 domain containing 1	1909.92	-0.611667	0.0889104	-6.87959	6.00239e-12	5.16372e-11
FBgn0032475	Sfmbt	Scm-related gene containing four mbt domains	2545.03	-0.529928	0.106725	-4.96535	6.85758e-07	2.89838e-06
FBgn0032479	CG16974	uncharacterized protein	4157.9	-0.56767	0.0864894	-6.56346	5.25728e-11	3.96151e-10
FBgn0032481	CG16972	uncharacterized protein	1071.63	-0.730871	0.141728	-5.15686	2.51126e-07	1.13373e-06
FBgn0032486	mRF1	mitochondrial translation release factor 1	353.316	-0.857692	0.145739	-5.88512	3.97769e-09	2.30583e-08
FBgn0032487	Ski6	Ski6	926.929	-1.1382	0.191053	-5.95753	2.5608e-09	1.52883e-08
FBgn0032499	Uvrag	UV-resistance associated gene	1114	-0.663001	0.10222	-6.48605	8.81164e-11	6.42109e-10
FBgn0032509	CG6523	uncharacterized protein	2894.32	-0.472053	0.193627	-2.43796	0.0147705	0.0280726
FBgn0032512	Bdp1	B double prime 1	1451.93	-0.37881	0.118789	-3.18893	0.00142802	0.00337087
FBgn0032513	CG6565	uncharacterized protein	1519.22	-0.878456	0.130924	-6.70968	1.95056e-11	1.55693e-10
FBgn0032514	CG9302	uncharacterized protein	1691.3	-0.699777	0.155319	-4.50542	6.62424e-06	2.39665e-05
FBgn0032521	CG7110	uncharacterized protein	1092.6	-0.810735	0.162647	-4.98462	6.20835e-07	2.64111e-06
FBgn0032524	Hacd2	3-hydroxyacyl-CoA dehydratase 2	772.101	-0.71719	0.136524	-5.25322	1.4946e-07	6.9501e-07
FBgn0032586	Tpr2	Tetratricopeptide repeat protein 2	6913.17	-0.339768	0.0815719	-4.16526	3.10993e-05	0.000100616
FBgn0032587	CG5953	uncharacterized protein	1527.98	-1.24659	0.298238	-4.17986	2.91693e-05	9.48922e-05
FBgn0032596	Prosbeta4	Proteasome beta4 subunit	4054.85	-0.643782	0.171968	-3.74361	0.000181394	0.000511635
FBgn0032620	CG12288	uncharacterized protein	2320.21	-1.45689	0.241991	-6.02043	1.73958e-09	1.0574e-08
FBgn0032634	Rpb11	Rpb11	727.185	-0.867921	0.176498	-4.91746	8.76745e-07	3.6693e-06
FBgn0032635	CG15141	uncharacterized protein	793.198	-0.511033	0.111127	-4.59866	4.2522e-06	1.59047e-05
FBgn0032640	Sgt	small glutamine-rich tetratricopeptide containing protein	4443.37	-0.387929	0.112975	-3.43376	0.000595265	0.00152138
FBgn0032644	CG5131	uncharacterized protein	517.091	-0.539568	0.15289	-3.52913	0.000416932	0.00109729
FBgn0032645	CG15142	uncharacterized protein	43.6686	-1.69232	0.324758	-5.21102	1.8781e-07	8.61701e-07
FBgn0032646	mEFTs	mitochondrial translation elongation factor Ts	2454.88	-0.406078	0.109596	-3.70522	0.000211206	0.000588356
FBgn0032647	CG15143	uncharacterized protein	26.8644	-2.61025	0.474108	-5.50561	3.6789e-08	1.88557e-07
FBgn0032663	CG15153	uncharacterized protein	8.68463	-2.13369	0.69764	-3.05844	0.00222492	0.0050462
FBgn0032671	JMJD4	Jumonji domain containing 4	460.557	-0.75539	0.126031	-5.9937	2.05118e-09	1.238e-08
FBgn0032681	CG10283	uncharacterized protein	1871.42	-0.647285	0.18059	-3.58428	0.000338007	0.000905543
FBgn0032688	CG15160	uncharacterized protein	1068.79	-0.567784	0.0907236	-6.2584	3.88958e-10	2.60931e-09
FBgn0032691	Atac2	Ada2a-containing complex component 2	490.481	-0.726712	0.0966311	-7.52048	5.45736e-14	6.12927e-13
FBgn0032698	CG10336	uncharacterized protein	493.892	-1.10625	0.105848	-10.4513	1.44587e-25	5.0313e-24
FBgn0032701	CG10341	uncharacterized protein	1760.55	-1.04089	0.121204	-8.58794	8.85434e-18	1.56921e-16
FBgn0032703	CG10343	uncharacterized protein	971.944	-0.757059	0.24752	-3.05857	0.00222393	0.00504488
FBgn0032705	Grip71	Grip71	948.546	-1.03886	0.143697	-7.22948	4.84848e-13	4.82046e-12
FBgn0032720	mRpL13	mitochondrial ribosomal protein L13	947.636	-0.959857	0.185452	-5.17576	2.26987e-07	1.02963e-06
FBgn0032723	ssp3	short spindle 3	1210.07	-0.604249	0.189423	-3.18994	0.00142301	0.00335967
FBgn0032724	CG10428	uncharacterized protein	791.713	-0.72227	0.072999	-9.89426	4.40874e-23	1.25842e-21
FBgn0032728	Tango6	Transport and Golgi organization 6	465.091	-0.978843	0.134503	-7.2775	3.40053e-13	3.44446e-12
FBgn0032730	CG10431	uncharacterized protein	99.0291	-0.792265	0.207245	-3.82284	0.000131921	0.000382189
FBgn0032746	CG10470	uncharacterized protein	1421.73	-0.677218	0.218002	-3.10648	0.0018933	0.00435952
FBgn0032748	CG10492	uncharacterized protein	1933.04	-0.442292	0.184945	-2.39148	0.0167807	0.0315108
FBgn0032750	CG10495	uncharacterized protein	309.943	-0.996865	0.242243	-4.11515	3.86936e-05	0.000123096
FBgn0032751	CG17343	uncharacterized protein	146.328	-0.864721	0.184514	-4.68647	2.77964e-06	1.07674e-05
FBgn0032752	CG10702	uncharacterized protein	470.722	-1.43821	0.173731	-8.2784	1.24837e-16	1.96254e-15
FBgn0032783	CG10237	uncharacterized protein	836.509	-0.823942	0.279186	-2.95123	0.00316511	0.00697677
FBgn0032790	CG10194	uncharacterized protein	353.671	-0.320959	0.144024	-2.22852	0.025846	0.0464974
FBgn0032793	CG10189	uncharacterized protein	422.272	-0.753548	0.120594	-6.24862	4.1409e-10	2.76239e-09
FBgn0032805	CG10337	uncharacterized protein	326.496	-0.476578	0.208718	-2.28336	0.022409	0.040836
FBgn0032811	CG10268	uncharacterized protein	295.068	-0.680796	0.225867	-3.01415	0.00257703	0.00576147
FBgn0032815	CG10462	uncharacterized protein	1679.73	-0.598918	0.154286	-3.88186	0.000103659	0.000305816
FBgn0032818	CG10628	uncharacterized protein	789.889	-0.483693	0.111764	-4.32782	1.50594e-05	5.12657e-05
FBgn0032819	CG10463	uncharacterized protein	1026.47	-0.865961	0.139965	-6.18697	6.13321e-10	3.99885e-09
FBgn0032847	Taf13	TBP-associated factor 13	489.318	-0.537707	0.236238	-2.27613	0.0228385	0.0415696
FBgn0032848	nesd	nessun dorma	994.989	-1.01091	0.129931	-7.78038	7.23064e-15	9.18699e-14
FBgn0032849	mRpS18B	mitochondrial ribosomal protein S18B	767.487	-0.892589	0.225548	-3.95742	7.57632e-05	0.000228916
FBgn0032858	CG10949	uncharacterized protein	431.373	-0.424259	0.174744	-2.42789	0.0151871	0.0288245
FBgn0032859	Arpc2	Actin-related protein 2/3 complex, subunit 2	5838.41	-0.839817	0.193072	-4.34976	1.36284e-05	4.67929e-05
FBgn0032863	Cdc23	Cell division cycle 23	676.889	-1.00503	0.146033	-6.88222	5.89253e-12	5.0798e-11
FBgn0032864	CG2493	uncharacterized protein	1766.42	-0.396306	0.1373	-2.88642	0.00389647	0.00841517
FBgn0032869	CG17470	uncharacterized protein	135.511	-1.92718	0.718646	-2.68168	0.00732535	0.0148813
FBgn0032870	CG2608	uncharacterized protein	632.035	-0.51799	0.218586	-2.36973	0.0178012	0.033216
FBgn0032873	CG2614	uncharacterized protein	1185.61	-1.00215	0.137634	-7.28128	3.30667e-13	3.35213e-12
FBgn0032876	Cen	Centrocortin	955.469	-0.557762	0.192329	-2.90004	0.00373111	0.00808624
FBgn0032877	CG2617	uncharacterized protein	275.528	-0.993313	0.210619	-4.71616	2.40336e-06	9.395e-06
FBgn0032883	Rhau	RHAU helicase	808.785	-0.523106	0.113248	-4.61911	3.85383e-06	1.45022e-05
FBgn0032884	Pomp	pomp	3019.3	-0.5356	0.191522	-2.79655	0.00516517	0.010869
FBgn0032901	sky	skywalker	2960.14	-0.437885	0.108794	-4.02491	5.69959e-05	0.000175988
FBgn0032906	RPA2	Replication protein A2	1350.34	-0.854901	0.116388	-7.34525	2.05377e-13	2.13799e-12
FBgn0032907	CG9272	uncharacterized protein	275.951	-0.676662	0.142907	-4.735	2.1906e-06	8.61498e-06
FBgn0032910	CG9265	uncharacterized protein	346.796	-0.897888	0.190352	-4.71698	2.39373e-06	9.36327e-06
FBgn0032916	CG9257	uncharacterized protein	878.859	-0.99503	0.170497	-5.83606	5.34502e-09	3.02624e-08
FBgn0032919	CG9253	uncharacterized protein	5509.27	-0.889121	0.150101	-5.92347	3.15214e-09	1.86035e-08
FBgn0032921	Mpp6	M-phase phosphoprotein 6	482.398	-1.38214	0.266932	-5.17788	2.2442e-07	1.01873e-06
FBgn0032922	Coq3	Coenzyme Q3	294.749	-0.540894	0.216444	-2.499	0.0124546	0.0240773
FBgn0032924	Nbr	Nibbler	2319.59	-0.958576	0.135539	-7.07233	1.52352e-12	1.4298e-11
FBgn0032925	CG9246	uncharacterized protein	4621.33	-1.17716	0.151935	-7.74775	9.35323e-15	1.17275e-13
FBgn0032929	Mcm10	Minichromosome maintenance 10	1167.77	-1.33771	0.169735	-7.88117	3.24318e-15	4.32936e-14
FBgn0032934	CG8679	uncharacterized protein	450.754	-1.04037	0.148609	-7.0007	2.54691e-12	2.31144e-11
FBgn0032940	Mondo	mondo	4261.97	-0.703612	0.11704	-6.01173	1.83556e-09	1.11247e-08
FBgn0032943	Tsp39D	Tetraspanin 39D	702.286	-0.38376	0.119841	-3.20224	0.00136362	0.00323425
FBgn0032956	Cul2	Cullin 2	2038.1	-0.406272	0.12628	-3.21724	0.00129432	0.00308286
FBgn0032957	CG2225	uncharacterized protein	1064.24	-0.839165	0.121736	-6.8933	5.45136e-12	4.73241e-11
FBgn0032961	CG1416	uncharacterized protein	4716.44	-0.670425	0.154594	-4.33667	1.44659e-05	4.94355e-05
FBgn0032974	CG3651	uncharacterized protein	1560.21	-0.591735	0.113484	-5.21426	1.84556e-07	8.47082e-07
FBgn0032986	CG3262	uncharacterized protein	1716.99	-0.523118	0.147462	-3.54748	0.000388938	0.00102996
FBgn0032987	RpL21	Ribosomal protein L21	53318.9	-0.816836	0.246955	-3.30763	0.000940898	0.00230535
FBgn0032988	Tif-IA	Tif-IA	3974.51	-1.25377	0.146881	-8.53592	1.39046e-17	2.43635e-16
FBgn0033000	CG14464	uncharacterized protein	1031.94	-0.744662	0.245259	-3.03623	0.00239559	0.00539083
FBgn0033005	CG3107	uncharacterized protein	3463.69	-0.850005	0.182626	-4.65436	3.24993e-06	1.24068e-05
FBgn0033015	d4	d4	1548.49	-0.704426	0.100344	-7.0201	2.21705e-12	2.02842e-11
FBgn0033017	CG10465	uncharacterized protein	1295.85	-0.638706	0.196934	-3.24325	0.00118176	0.00283438
FBgn0033019	CG10395	uncharacterized protein	510.115	-1.01673	0.179794	-5.65495	1.5589e-08	8.35289e-08
FBgn0033021	CG10417	uncharacterized protein	3256.28	-0.563594	0.13427	-4.19748	2.69907e-05	8.83986e-05
FBgn0033028	hrm	hermes	2654.15	-0.624033	0.180352	-3.46009	0.000539992	0.00139102
FBgn0033029	Not3	CCR4-NOT transcription complex subunit 3	3901.82	-0.384258	0.114587	-3.35343	0.000798177	0.0019911
FBgn0033060	CG7849	uncharacterized protein	258.269	-0.738511	0.188595	-3.91587	9.00804e-05	0.000268507
FBgn0033062	Ars2	Arsenic resistance protein 2	4502.7	-0.542804	0.104968	-5.17111	2.32707e-07	1.0548e-06
FBgn0033074	tomboy40	tomboy40	18.9049	-1.27327	0.478945	-2.65848	0.00784939	0.0158549
FBgn0033081	geminin	geminin	1898.09	-0.569077	0.140461	-4.0515	5.0891e-05	0.000158362
FBgn0033085	CG15908	uncharacterized protein	361.685	-0.876507	0.257147	-3.40858	0.000653023	0.00165485
FBgn0033087	Hsepi	Heparan sulfate C5-epimerase	659.386	-0.422727	0.144245	-2.93062	0.00338289	0.00740672
FBgn0033089	CG17266	uncharacterized protein	574.292	-0.956574	0.224264	-4.2654	1.99545e-05	6.67198e-05
FBgn0033092	CG9422	uncharacterized protein	934.512	-0.763221	0.232312	-3.28532	0.00101866	0.00247871
FBgn0033095	chk	chaski	1205.08	-0.355768	0.141295	-2.51791	0.0118053	0.0229366
FBgn0033100	CG3420	uncharacterized protein	950.42	-0.818574	0.256706	-3.18877	0.00142882	0.00337211
FBgn0033117	CG3358	uncharacterized protein	790.802	-0.72457	0.148365	-4.8837	1.04116e-06	4.29213e-06
FBgn0033160	Dhx15	DEAH-box helicase 15	3771.82	-0.680673	0.0969972	-7.01745	2.25951e-12	2.06422e-11
FBgn0033166	Eaf	ELL-associated factor	1812.44	-0.251353	0.0972421	-2.58482	0.00974312	0.019287
FBgn0033169	CG11123	uncharacterized protein	1608.08	-0.954232	0.174526	-5.46756	4.56265e-08	2.30052e-07
FBgn0033174	CG11125	uncharacterized protein	264.012	-1.08126	0.198167	-5.45632	4.86115e-08	2.44102e-07
FBgn0033183	CG1620	uncharacterized protein	3813.99	-0.599881	0.133233	-4.50249	6.71629e-06	2.42499e-05
FBgn0033186	CG1602	uncharacterized protein	152.633	-0.548399	0.14465	-3.7912	0.000149918	0.000430004
FBgn0033187	PIG-G	Phosphatidylinositol glycan anchor biosynthesis class G	782.504	-0.504353	0.0978099	-5.15646	2.51664e-07	1.13574e-06
FBgn0033195	CG1360	uncharacterized protein	469.74	-1.02415	0.187509	-5.46186	4.71161e-08	2.37266e-07
FBgn0033196	CG1358	uncharacterized protein	832.944	-0.533654	0.214739	-2.48513	0.0129504	0.0249229
FBgn0033209	CG12107	uncharacterized protein	1490.28	-0.619575	0.200202	-3.09475	0.00196977	0.0045163
FBgn0033210	U2A	U2A	765.956	-0.517705	0.140283	-3.69044	0.000223869	0.000620977
FBgn0033224	Nop17l	Nop17 like	3139.5	-0.394075	0.126815	-3.10747	0.00188698	0.00434819
FBgn0033225	TTLL12	Tubulin tyrosine ligase-like 12	1695.73	-0.413353	0.138748	-2.97917	0.00289026	0.00640741
FBgn0033233	Kdm4A	Lysine (K)-specific demethylase 4A	497.244	-0.503902	0.103482	-4.86947	1.11899e-06	4.59162e-06
FBgn0033235	CG8728	uncharacterized protein	2723.31	-0.265585	0.11157	-2.38042	0.0172929	0.0323407
FBgn0033236	CG14764	uncharacterized protein	2187.35	-0.725666	0.121594	-5.96796	2.40239e-09	1.43981e-08
FBgn0033258	CG8712	uncharacterized protein	242.046	-0.9268	0.135197	-6.85519	7.12187e-12	6.05115e-11
FBgn0033260	Cul4	Cullin 4	2604.37	-0.379076	0.0824788	-4.59605	4.30582e-06	1.60761e-05
FBgn0033264	Nup50	Nucleoporin 50kD	2842.05	-0.775637	0.137581	-5.63766	1.7238e-08	9.18472e-08
FBgn0033265	coil	coilin	535.227	-0.684203	0.156394	-4.37486	1.21511e-05	4.19765e-05
FBgn0033273	Gasz	gasz	991.998	-1.33327	0.148543	-8.97567	2.81627e-19	5.71933e-18
FBgn0033315	beta3GalTII	beta-1,3-Galactosyltransferase II	309.93	-0.588136	0.12099	-4.86102	1.16783e-06	4.77935e-06
FBgn0033316	Gle1	Gle1 RNA export mediator	941.223	-0.60049	0.119624	-5.0198	5.17257e-07	2.22492e-06
FBgn0033317	CG8635	uncharacterized protein	4478.65	-0.577142	0.1665	-3.46631	0.000527652	0.00136178
FBgn0033337	CG8272	uncharacterized protein	456.798	-0.329347	0.146352	-2.25038	0.0244251	0.0441849
FBgn0033344	CG8252	uncharacterized protein	27.8114	-1.30955	0.321082	-4.07855	4.53174e-05	0.000142449
FBgn0033348	Spt	Spitting Image	208.274	-1.00208	0.136299	-7.35202	1.95236e-13	2.04272e-12
FBgn0033354	FANCI	Fanconi anemia complementation group I	565.894	-0.890778	0.21121	-4.2175	2.47029e-05	8.16051e-05
FBgn0033357	Tom7	Translocase of outer membrane 7	4235.6	-0.862954	0.299806	-2.87837	0.00399735	0.00861203
FBgn0033372	CG13742	uncharacterized protein	385.156	-0.985388	0.11326	-8.7002	3.31292e-18	6.1715e-17
FBgn0033373	CG8080	uncharacterized protein	923.595	-0.520561	0.146519	-3.55286	0.000381073	0.00101108
FBgn0033374	CG13741	uncharacterized protein	2468.11	-2.22362	0.284383	-7.81909	5.32058e-15	6.87292e-14
FBgn0033375	CG8078	uncharacterized protein	1125.23	-1.21152	0.237361	-5.10412	3.32331e-07	1.47507e-06
FBgn0033376	CG8777	uncharacterized protein	746.376	-0.48098	0.124316	-3.86901	0.000109276	0.000321013
FBgn0033378	tsu	tsunagi	2038.16	-0.640751	0.205523	-3.11767	0.00182287	0.00421772
FBgn0033379	Mys45A	Mystery 45A	3364.04	-1.05902	0.159965	-6.6203	3.58468e-11	2.75478e-10
FBgn0033380	Phax	Phosphorylated adaptor for RNA export	731.128	-0.366919	0.125328	-2.92768	0.00341505	0.00746526
FBgn0033381	GstE13	Glutathione S transferase E13	618.759	-0.786498	0.167048	-4.70821	2.49901e-06	9.75047e-06
FBgn0033392	CG8027	uncharacterized protein	378.867	-1.13574	0.14303	-7.94057	2.01247e-15	2.75779e-14
FBgn0033421	CG1888	uncharacterized protein	1049.01	-0.788958	0.151757	-5.19884	2.0054e-07	9.17048e-07
FBgn0033427	Smyd4-1	SET and MYND domain containing, class 4, member 1	490.885	-0.707192	0.093011	-7.60331	2.88645e-14	3.41522e-13
FBgn0033429	CG12929	uncharacterized protein	389.234	-0.68738	0.252301	-2.72444	0.00644105	0.0132368
FBgn0033449	CG1663	uncharacterized protein	237.183	-0.900653	0.204292	-4.40865	1.04015e-05	3.62561e-05
FBgn0033450	Lsm11	Lsm11	98.7273	-0.797944	0.24074	-3.31454	0.000917933	0.00225354
FBgn0033454	CG1671	uncharacterized protein	2524.8	-0.842617	0.130682	-6.44787	1.13436e-10	8.14164e-10
FBgn0033457	Ntmt	N-terminal methyltransferase	733.316	-0.738781	0.184736	-3.99911	6.35802e-05	0.000194717
FBgn0033459	CG12744	uncharacterized protein	1665.85	-2.03286	0.132797	-15.3081	6.75233e-53	1.39413e-50
FBgn0033467	Pdrg1	Pdrg1 prefoldin-like subunit	209.679	-0.802474	0.222357	-3.60894	0.000307446	0.000830494
FBgn0033471	CG12134	uncharacterized protein	1624.68	-0.855439	0.223484	-3.82774	0.000129326	0.00037511
FBgn0033473	CG12128	uncharacterized protein	1813.46	-1.1794	0.197792	-5.96282	2.47926e-09	1.48301e-08
FBgn0033475	CG12129	uncharacterized protein	656.168	-1.02415	0.204255	-5.01407	5.32918e-07	2.28911e-06
FBgn0033479	PIG-N	Phosphatidylinositol glycan anchor biosynthesis class N	229.953	-0.436632	0.157003	-2.78104	0.00541843	0.0113384
FBgn0033480	mRpL42	mitochondrial ribosomal protein L42	1109.98	-0.593665	0.232426	-2.55421	0.010643	0.0208516
FBgn0033482	CG1371	uncharacterized protein	4187.5	-0.496514	0.0719438	-6.90141	5.14891e-12	4.48556e-11
FBgn0033485	RpLP0-like	Ribosomal protein LP0-like	3458.25	-1.09991	0.242819	-4.52974	5.90552e-06	2.15423e-05
FBgn0033507	CG12909	uncharacterized protein	1903.38	-1.44708	0.196323	-7.37093	1.69437e-13	1.78182e-12
FBgn0033519	CG11825	uncharacterized protein	121.407	-1.15822	0.390464	-2.96627	0.00301439	0.00666708
FBgn0033526	Caf1-105	Chromatin assembly factor 1, p105 subunit	599.274	-0.978573	0.104118	-9.3987	5.52396e-21	1.30097e-19
FBgn0033527	CG11777	uncharacterized protein	331.52	-0.634957	0.192877	-3.29204	0.000994629	0.00242644
FBgn0033528	trsn	translin	864.166	-0.652332	0.196707	-3.31627	0.000912289	0.00224279
FBgn0033538	CG11883	uncharacterized protein	1022.91	-1.06229	0.158387	-6.7069	1.98804e-11	1.58378e-10
FBgn0033540	Elp2	Elongator complex protein 2	1582.86	-0.881065	0.144608	-6.09279	1.10962e-09	6.94941e-09
FBgn0033547	CG12935	uncharacterized protein	425.573	-0.992329	0.139039	-7.13707	9.53383e-13	9.17677e-12
FBgn0033548	CG7637	uncharacterized protein	2133.09	-1.67497	0.304682	-5.49743	3.85371e-08	1.9719e-07
FBgn0033549	mms4	Methyl methanesulfonate sensitivity 4	133.631	-1.19823	0.234565	-5.10831	3.25053e-07	1.44432e-06
FBgn0033550	CG12341	uncharacterized protein	302.444	-0.251283	0.110751	-2.2689	0.0232741	0.042288
FBgn0033554	Lsm10	Lsm10	165.987	-1.29767	0.26619	-4.87497	1.08825e-06	4.47434e-06
FBgn0033555	RpS15Ab	Ribosomal protein S15Ab	1381.65	-0.911327	0.152552	-5.97389	2.31669e-09	1.39114e-08
FBgn0033556	CG12343	uncharacterized protein	732.416	-0.528929	0.238202	-2.2205	0.0263845	0.0473767
FBgn0033557	CG12325	uncharacterized protein	2356.99	-1.23937	0.130498	-9.49725	2.15511e-21	5.31824e-20
FBgn0033564	Pex6	Peroxin 6	578.529	-0.468895	0.154134	-3.04213	0.00234911	0.00529587
FBgn0033569	CG12942	uncharacterized protein	565.374	-1.00351	0.134441	-7.46429	8.37481e-14	9.18116e-13
FBgn0033571	Rpb5	Rpb5	1705.11	-0.941249	0.172384	-5.4602	4.75592e-08	2.39303e-07
FBgn0033581	CG12391	uncharacterized protein	1531.24	-0.464782	0.10843	-4.28647	1.81538e-05	6.11111e-05
FBgn0033588	CG13228	uncharacterized protein	10.2991	-1.43084	0.539648	-2.65144	0.00801498	0.0161604
FBgn0033589	CG13227	uncharacterized protein	12.6923	-2.42297	0.71903	-3.36977	0.000752306	0.00188579
FBgn0033607	CG9062	uncharacterized protein	1205	-0.458201	0.0953778	-4.80407	1.55474e-06	6.25533e-06
FBgn0033609	Fbl6	F-box and leucine-rich repeat protein 6	1233.74	-0.559844	0.121756	-4.59808	4.26396e-06	1.59438e-05
FBgn0033615	CG7741	uncharacterized protein	682.254	-0.796666	0.130939	-6.08425	1.1704e-09	7.30425e-09
FBgn0033616	CG7745	uncharacterized protein	316.54	-0.30266	0.120502	-2.51165	0.0120168	0.023322
FBgn0033638	CG9005	uncharacterized protein	2859.32	-0.555717	0.239526	-2.32007	0.0203373	0.0374852
FBgn0033653	CG13192	uncharacterized protein	734.311	-0.76686	0.123004	-6.23442	4.53462e-10	2.99759e-09
FBgn0033661	CG13185	uncharacterized protein	12150.2	-2.11978	0.395559	-5.35896	8.37041e-08	4.04891e-07
FBgn0033672	rho-7	rhomboid-7	1321.28	-0.514872	0.114466	-4.49803	6.85868e-06	2.47208e-05
FBgn0033673	CG8298	uncharacterized protein	463.241	-0.221007	0.0824623	-2.6801	0.00736003	0.0149396
FBgn0033686	Hen1	Hen1 methyltransferase	365.178	-0.993313	0.18767	-5.29286	1.20418e-07	5.67847e-07
FBgn0033688	Prp8	pre-mRNA processing factor 8	10561.8	-0.761694	0.218843	-3.48054	0.000500395	0.00129929
FBgn0033691	CG8860	uncharacterized protein	2326.84	-0.71738	0.212308	-3.37896	0.000727613	0.0018287
FBgn0033693	CG13175	uncharacterized protein	518.8	-0.865843	0.145597	-5.94686	2.73328e-09	1.62476e-08
FBgn0033699	RpS11	Ribosomal protein S11	49829	-0.675181	0.195797	-3.44838	0.000563967	0.00144826
FBgn0033712	mIF3	mitochondrial translation initiation factor 3	388.435	-0.7785	0.162989	-4.77639	1.78473e-06	7.11595e-06
FBgn0033713	CG8841	uncharacterized protein	884.692	-0.392593	0.098838	-3.97209	7.12451e-05	0.000216532
FBgn0033715	CG8490	uncharacterized protein	381.175	-0.946428	0.12961	-7.30214	2.83224e-13	2.9141e-12
FBgn0033716	Den1	Deneddylase 1	949.311	-0.465007	0.138706	-3.35246	0.000800978	0.00199769
FBgn0033735	Dera	Deoxyribose-phosphate aldolase	937.827	-0.628361	0.15195	-4.13532	3.54457e-05	0.000113404
FBgn0033737	Nup54	Nucleoporin 54kD	1589.07	-0.732308	0.119854	-6.11	9.96305e-10	6.28103e-09
FBgn0033740	dgt5	dim gamma-tubulin 5	285.637	-0.92502	0.114837	-8.05506	7.94428e-16	1.14169e-14
FBgn0033741	CG8545	uncharacterized protein	11173.7	-1.38867	0.192337	-7.22	5.19871e-13	5.15213e-12
FBgn0033748	vis	vismay	111.174	-1.76038	0.422336	-4.16819	3.07027e-05	9.94626e-05
FBgn0033752	CG8569	uncharacterized protein	383.514	-0.36309	0.128037	-2.83582	0.00457085	0.00972749
FBgn0033754	Ak6	Adenylate kinase 6	825.213	-1.45775	0.237531	-6.13711	8.40375e-10	5.34973e-09
FBgn0033757	muskelin	muskelin	1661.74	-1.33329	0.207022	-6.44035	1.19202e-10	8.516e-10
FBgn0033761	CG8778	uncharacterized protein	1505.15	-0.58763	0.149585	-3.9284	8.55121e-05	0.000256123
FBgn0033766	Nup188	Nucleoporin 188kDa	2342.72	-0.967441	0.197339	-4.90244	9.46524e-07	3.93342e-06
FBgn0033767	CG13148	uncharacterized protein	71.4374	-1.61219	0.297672	-5.41599	6.09521e-08	3.01307e-07
FBgn0033773	Mos	Mos oncogene	609.608	-1.93984	0.421491	-4.60233	4.17794e-06	1.56505e-05
FBgn0033781	CG13319	uncharacterized protein	735.495	-0.815973	0.201452	-4.05045	5.11193e-05	0.000158992
FBgn0033806	FLASH	FLICE-associated huge protein	436.235	-0.737151	0.157278	-4.68693	2.77329e-06	1.07495e-05
FBgn0033808	CG4627	uncharacterized protein	415.669	-0.709039	0.18525	-3.82748	0.000129464	0.000375421
FBgn0033810	CG4646	uncharacterized protein	711.908	-0.719034	0.272958	-2.63423	0.00843285	0.0169354
FBgn0033816	CG4679	uncharacterized protein	1757.64	-0.689817	0.0732101	-9.42243	4.40769e-21	1.04602e-19
FBgn0033817	GstE14	Glutathione S transferase E14	513.552	-2.94362	0.401475	-7.33202	2.26713e-13	2.35614e-12
FBgn0033830	CG10814	uncharacterized protein	24.8488	-1.55626	0.656635	-2.37005	0.0177857	0.0331972
FBgn0033845	mars	mars	768.411	-0.456552	0.196667	-2.32145	0.0202627	0.0373645
FBgn0033846	mip120	Myb-interacting protein 120	1411.61	-0.81986	0.102472	-8.0008	1.23614e-15	1.73817e-14
FBgn0033859	fand	fandango	1382.56	-0.478433	0.137435	-3.48116	0.000499239	0.00129656
FBgn0033871	CG13339	uncharacterized protein	186.893	-0.726497	0.275113	-2.64072	0.00827306	0.0166374
FBgn0033879	Echs1	Enoyl-CoA hydratase, short chain 1	5791.28	-0.397992	0.176706	-2.25229	0.0243042	0.043979
FBgn0033884	CG13344	uncharacterized protein	680.308	-1.02981	0.129985	-7.92256	2.32661e-15	3.17423e-14
FBgn0033887	St4	Sulfotransferase 4	20.9362	-1.0959	0.452181	-2.42358	0.0153684	0.0291285
FBgn0033890	Ctf4	Chromosome transmission fidelity 4	1030.33	-0.886945	0.130595	-6.79155	1.10935e-11	9.17398e-11
FBgn0033891	CG8067	uncharacterized protein	364.165	-0.420806	0.170588	-2.46679	0.0136329	0.0261228
FBgn0033897	Rcd1	Reduction in Cnn dots 1	2450.39	-0.480333	0.126419	-3.79955	0.000144959	0.000416456
FBgn0033899	CG13016	uncharacterized protein	455.976	-0.291043	0.100335	-2.90072	0.00372302	0.00807012
FBgn0033900	CysRS-m	Cysteinyl-tRNA synthetase, mitochondrial	503.52	-0.428375	0.132835	-3.22487	0.00126029	0.00300818
FBgn0033901	O-fut1	O-fucosyltransferase 1	840.401	-0.66925	0.153232	-4.36755	1.25646e-05	4.33447e-05
FBgn0033902	eIF3m	eukaryotic translation initiation factor 3 subunit m	6389.56	-0.408964	0.104911	-3.8982	9.69093e-05	0.000287369
FBgn0033907	mRpS16	mitochondrial ribosomal protein S16	1088.35	-0.810685	0.212887	-3.80805	0.000140066	0.00040324
FBgn0033912	RpS23	Ribosomal protein S23	61558.2	-0.701738	0.21283	-3.29717	0.000976645	0.00238586
FBgn0033916	Usp20-33	Ubiquitin specific protease 20/33	1117.38	-0.477956	0.0988761	-4.83389	1.33893e-06	5.44182e-06
FBgn0033918	CG8531	uncharacterized protein	2908.42	-0.52279	0.0717555	-7.28572	3.19966e-13	3.25163e-12
FBgn0033921	tej	tejas	1086.89	-1.99768	0.172335	-11.5918	4.53418e-31	2.38006e-29
FBgn0033929	Tfb1	Transcription factor B1	2540.4	-0.647501	0.105341	-6.14673	7.90952e-10	5.05328e-09
FBgn0033934	CG17385	uncharacterized protein	1949.81	-0.487597	0.138709	-3.51526	0.000439319	0.00115083
FBgn0033948	CG12863	uncharacterized protein	270.28	-1.09123	0.164601	-6.62955	3.36703e-11	2.59719e-10
FBgn0033951	CG10139	uncharacterized protein	478.027	-0.615894	0.132441	-4.65031	3.3143e-06	1.26214e-05
FBgn0033960	CG10151	uncharacterized protein	164.925	-1.83444	0.303745	-6.0394	1.54685e-09	9.48919e-09
FBgn0033971	CG10209	uncharacterized protein	638.888	-0.571204	0.124922	-4.57247	4.81999e-06	1.78773e-05
FBgn0033972	Ciao1	Ciao1	1419.2	-0.292311	0.128433	-2.27598	0.0228471	0.0415792
FBgn0033979	Cyp6a19	Cyp6a19	1168.92	-2.12527	0.522653	-4.0663	4.77648e-05	0.000149611
FBgn0033984	Lap1	Lap1	1042.93	-0.790732	0.161934	-4.88304	1.0446e-06	4.30491e-06
FBgn0033988	pcs	parcas	3462.62	-1.16266	0.156597	-7.42451	1.13195e-13	1.21513e-12
FBgn0033989	CG7639	uncharacterized protein	982.017	-0.2727	0.117751	-2.31591	0.0205633	0.0378625
FBgn0033990	CG10265	uncharacterized protein	272.33	-0.37727	0.118583	-3.18149	0.00146521	0.00344814
FBgn0033993	CG8089	uncharacterized protein	96.9812	-1.10469	0.191174	-5.77845	7.53902e-09	4.18242e-08
FBgn0033994	CG7544	uncharacterized protein	252.362	-0.724896	0.134811	-5.37713	7.5683e-08	3.68828e-07
FBgn0033995	GPHR	Golgi pH Regulator	446.766	-0.327822	0.11066	-2.96242	0.00305226	0.00674481
FBgn0033998	row	relative of woc	3235.7	-0.806711	0.107164	-7.52781	5.15981e-14	5.82147e-13
FBgn0034000	CG11808	uncharacterized protein	254.104	-0.518754	0.189245	-2.74118	0.00612184	0.0126564
FBgn0034001	mRpL41	mitochondrial ribosomal protein L41	680.503	-0.65137	0.242464	-2.68646	0.00722136	0.0146821
FBgn0034007	ND-51L2	NADH dehydrogenase (ubiquinone) 51 kDa subunit-like 2	3.04212	-3.30224	1.30419	-2.53202	0.0113406	0.0220858
FBgn0034008	CG8152	uncharacterized protein	150.539	-0.638511	0.259443	-2.46108	0.0138518	0.0265013
FBgn0034025	Pgant1	Polypeptide N-Acetylgalactosaminyltransferase 1	1239.89	-0.524008	0.108713	-4.82009	1.43496e-06	5.81113e-06
FBgn0034027	CG8187	uncharacterized protein	433.839	-0.518341	0.113702	-4.55875	5.146e-06	1.89784e-05
FBgn0034029	eIF2Bgamma	eukaryotic translation initiation factor 2B subunit gamma	1071.29	-0.626802	0.122168	-5.13066	2.88727e-07	1.29358e-06
FBgn0034033	CG8204	uncharacterized protein	292.29	-1.06532	0.16936	-6.29027	3.16923e-10	2.14772e-09
FBgn0034046	tun	tungus	1187.32	-0.374309	0.143327	-2.61157	0.00901277	0.0179617
FBgn0034051	Mlf	Myelodysplasia/myeloid leukemia factor	3382.03	-0.631876	0.0957986	-6.59587	4.22755e-11	3.22807e-10
FBgn0034054	CG8366	uncharacterized protein	404.924	-0.434207	0.174172	-2.49299	0.0126674	0.0244277
FBgn0034059	CG8320	uncharacterized protein	489.965	-0.471452	0.158207	-2.97997	0.00288281	0.00639317
FBgn0034060	CG8370	uncharacterized protein	1746.17	-0.462888	0.137687	-3.36189	0.000774101	0.00193533
FBgn0034061	Ufc1	Ubiquitin-fold modifier conjugating enzyme 1	933.131	-0.529502	0.235054	-2.25269	0.024279	0.0439527
FBgn0034062	CG8388	uncharacterized protein	222.738	-0.607321	0.169022	-3.59315	0.0003267	0.00087791
FBgn0034065	Rrp42	Rrp42	901.127	-1.02123	0.168698	-6.05363	1.41619e-09	8.75873e-09
FBgn0034073	CG8414	uncharacterized protein	1928.16	-1.33345	0.121655	-10.961	5.88672e-28	2.47202e-26
FBgn0034084	CG8435	uncharacterized protein	474.569	-0.640426	0.176735	-3.62365	0.00029048	0.000788993
FBgn0034086	CG8441	uncharacterized protein	665.375	-0.909246	0.218857	-4.15452	3.25973e-05	0.000104898
FBgn0034087	clu	clueless	8976.17	-1.04692	0.169293	-6.18407	6.24686e-10	4.06867e-09
FBgn0034091	mrj	mrj	1604.11	-0.992054	0.121281	-8.17978	2.84374e-16	4.2909e-15
FBgn0034098	krimp	krimper	1101.58	-1.37561	0.118887	-11.5707	5.79991e-31	3.03161e-29
FBgn0034109	CG7747	uncharacterized protein	456.14	-0.502792	0.127547	-3.94201	8.08011e-05	0.000242953
FBgn0034113	CG8060	uncharacterized protein	541.333	-0.431734	0.129617	-3.33085	0.000865825	0.00214174
FBgn0034114	CG4282	uncharacterized protein	437.397	-0.36412	0.0895731	-4.06506	4.80211e-05	0.000150299
FBgn0034117	CG7997	uncharacterized protein	803.218	-1.11454	0.246017	-4.53033	5.88909e-06	2.1495e-05
FBgn0034118	Nup62	Nucleoporin 62kD	1717.26	-0.610484	0.118154	-5.16687	2.38047e-07	1.07782e-06
FBgn0034138	RpS15	Ribosomal protein S15	50546.8	-0.61328	0.167637	-3.65838	0.000253815	0.000698259
FBgn0034143	CG8303	uncharacterized protein	1380.83	-0.967178	0.218688	-4.42264	9.75037e-06	3.41787e-05
FBgn0034176	ste24a	prenyl protease type I	1724.46	-0.237745	0.0760825	-3.12483	0.00177908	0.0041272
FBgn0034177	AsnRS-m	Asparaginyl-tRNA synthetase, mitochondrial	277.58	-0.413039	0.123289	-3.35018	0.000807595	0.00201257
FBgn0034186	CG8950	uncharacterized protein	350.323	-0.530804	0.137834	-3.85104	0.000117617	0.000343075
FBgn0034187	CG6967	uncharacterized protein	659.608	-1.55067	0.170825	-9.07751	1.11086e-19	2.32063e-18
FBgn0034191	CG6984	uncharacterized protein	410.219	-1.02687	0.195031	-5.26514	1.40083e-07	6.53615e-07
FBgn0034194	CG15611	uncharacterized protein	820.529	-1.09192	0.141046	-7.74158	9.81914e-15	1.2262e-13
FBgn0034214	CG6550	uncharacterized protein	1003.67	-0.803354	0.166914	-4.81297	1.48707e-06	6.00254e-06
FBgn0034215	Mtap	Methylthioadenosine phosphorylase	2717.17	-0.702398	0.179777	-3.90706	9.34245e-05	0.000278141
FBgn0034217	Lhr	Lethal hybrid rescue	96.6957	-0.947807	0.232478	-4.07697	4.56256e-05	0.000143309
FBgn0034223	Tes	Testin	1086.32	-0.231668	0.0925288	-2.50374	0.0122889	0.0237829
FBgn0034231	APC10	Anaphase Promoting Complex subunit 10	373.324	-0.568446	0.172064	-3.3037	0.000954195	0.00233423
FBgn0034232	CG4866	uncharacterized protein	1282	-1.38579	0.255033	-5.43377	5.51766e-08	2.74179e-07
FBgn0034237	eIF3b	eukaryotic translation initiation factor 3 subunit b	21854.2	-0.618315	0.137261	-4.50467	6.6475e-06	2.40295e-05
FBgn0034240	MESR4	Misexpression suppressor of ras 4	3098.65	-1.12154	0.281818	-3.97967	6.90116e-05	0.000210156
FBgn0034242	CG14480	uncharacterized protein	1140.2	-0.559853	0.159964	-3.49986	0.000465501	0.00121403
FBgn0034243	Ns2	Nucleostemin 2	4762.77	-0.774966	0.132164	-5.86368	4.52707e-09	2.59443e-08
FBgn0034249	RhoGAP54D	Rho GTPase activating protein at 54D	507.844	-0.59903	0.186614	-3.20999	0.00132738	0.00315676
FBgn0034253	CG10936	uncharacterized protein	259.279	-1.02574	0.290762	-3.52778	0.000419055	0.00110148
FBgn0034255	Oxp	Oxpecker	297.188	-1.7071	0.320235	-5.33079	9.77859e-08	4.6735e-07
FBgn0034258	eIF3c	eukaryotic translation initiation factor 3 subunit c	19423	-0.629845	0.113808	-5.53427	3.12531e-08	1.61587e-07
FBgn0034259	P32	P32	5780.88	-0.932709	0.109622	-8.50838	1.76377e-17	3.04312e-16
FBgn0034265	Snx16	Sorting nexin 16	815.257	-0.576464	0.111555	-5.16754	2.37198e-07	1.07437e-06
FBgn0034266	CG4975	uncharacterized protein	663.634	-1.01813	0.304853	-3.33973	0.00083859	0.00208311
FBgn0034270	PIG-A	Phosphatidylinositol glycan anchor biosynthesis class A	428.804	-0.724275	0.257104	-2.81705	0.00484673	0.0102705
FBgn0034282	Mapmodulin	mapmodulin	7556.51	-0.751052	0.14095	-5.32851	9.90235e-08	4.729e-07
FBgn0034299	CG5757	uncharacterized protein	1078.47	-1.36118	0.205987	-6.60809	3.89312e-11	2.98071e-10
FBgn0034300	CG5098	uncharacterized protein	973.831	-0.641764	0.228498	-2.80861	0.00497553	0.0105111
FBgn0034304	CG5742	uncharacterized protein	607.104	-0.286088	0.108782	-2.62991	0.00854072	0.0171174
FBgn0034307	CG10914	uncharacterized protein	671.851	-0.687516	0.143058	-4.80586	1.54088e-06	6.20558e-06
FBgn0034310	Nup75	Nucleoporin 75kD	1660.45	-0.555653	0.0943927	-5.88661	3.94197e-09	2.28619e-08
FBgn0034313	CG5726	uncharacterized protein	2019.6	-0.94307	0.122021	-7.72876	1.08597e-14	1.34262e-13
FBgn0034314	nopo	no poles	375.517	-1.25992	0.162807	-7.73877	1.00381e-14	1.25103e-13
FBgn0034321	CG14502	uncharacterized protein	41.2941	-1.70886	0.454305	-3.76148	0.000168909	0.000479635
FBgn0034351	rswl	roswell	846.304	-0.781609	0.130962	-5.96821	2.39868e-09	1.43828e-08
FBgn0034354	GstE11	Glutathione S transferase E11	308.124	-0.61612	0.227253	-2.71117	0.0067047	0.0137354
FBgn0034360	CG10927	uncharacterized protein	219.017	-0.847315	0.227315	-3.72749	0.000193399	0.000542901
FBgn0034361	mRpS28	mitochondrial ribosomal protein S28	1003.69	-0.91869	0.252181	-3.64298	0.0002695	0.000737967
FBgn0034362	CG5323	uncharacterized protein	1337.74	-1.10337	0.247968	-4.44965	8.60095e-06	3.04947e-05
FBgn0034371	Ntan1	N-terminal amidohydrolase 1	868.491	-0.586884	0.183688	-3.195	0.00139832	0.00331149
FBgn0034380	Vps51	Vacuolar protein sorting 51	502.108	-0.311895	0.122642	-2.54313	0.0109865	0.0214536
FBgn0034390	CG15093	uncharacterized protein	4605.79	-0.557346	0.20977	-2.65694	0.00788536	0.0159172
FBgn0034391	CG15080	uncharacterized protein	115.781	-0.964484	0.331805	-2.90677	0.00365177	0.00792816
FBgn0034401	MetRS	Methionyl-tRNA synthetase	2925.61	-0.457591	0.115893	-3.94838	7.86804e-05	0.000237094
FBgn0034402	CG15084	uncharacterized protein	172.294	-0.812281	0.230474	-3.5244	0.000424449	0.00111463
FBgn0034403	CG18190	uncharacterized protein	891.142	-1.94008	0.28842	-6.72658	1.73693e-11	1.39812e-10
FBgn0034422	CG7137	uncharacterized protein	977.83	-1.56912	0.184738	-8.49373	2.00103e-17	3.4286e-16
FBgn0034425	CG11906	uncharacterized protein	396.738	-0.263804	0.0895276	-2.94662	0.00321272	0.00707038
FBgn0034430	mip40	Myb-interacting protein 40	1131.91	-0.860736	0.187631	-4.58738	4.48839e-06	1.66973e-05
FBgn0034439	CG10062	uncharacterized protein	340.138	-1.5882	0.355036	-4.47336	7.69994e-06	2.75049e-05
FBgn0034447	CG7744	uncharacterized protein	1206.78	-1.19489	0.106201	-11.2512	2.28387e-29	1.06363e-27
FBgn0034452	Oseg6	Outer segment 6	289.535	-1.35845	0.202646	-6.70355	2.03421e-11	1.61537e-10
FBgn0034488	Hacl	2-hydroxyacyl-CoA lyase	2899.25	-0.362434	0.134076	-2.70319	0.00686776	0.0140207
FBgn0034494	CG10444	uncharacterized protein	1205.99	-0.488521	0.183194	-2.66668	0.00766039	0.0155111
FBgn0034495	CG11788	uncharacterized protein	431.09	-1.08101	0.317557	-3.40415	0.000663703	0.00167863
FBgn0034496	CG9143	uncharacterized protein	2909.38	-0.950531	0.183014	-5.19376	2.06085e-07	9.40326e-07
FBgn0034500	CG11200	Carbonyl reductase	1285.68	-0.696648	0.137108	-5.08102	3.75405e-07	1.65264e-06
FBgn0034503	MED8	Mediator complex subunit 8	579.674	-0.454775	0.161132	-2.82237	0.00476704	0.010112
FBgn0034523	Nnf1a	Nnf1a	348.663	-1.20063	0.190036	-6.31791	2.65129e-10	1.8156e-09
FBgn0034527	CG9945	uncharacterized protein	756.803	-0.234581	0.0820568	-2.85877	0.00425289	0.00911202
FBgn0034528	CG11180	uncharacterized protein	2405.62	-1.25946	0.180577	-6.97463	3.06676e-12	2.75297e-11
FBgn0034529	FAM21	Family with sequence similarity 21	658.093	-0.958058	0.181795	-5.27001	1.36419e-07	6.3724e-07
FBgn0034534	maf-S	maf-S	1043.54	-0.516029	0.215443	-2.3952	0.0166115	0.0312645
FBgn0034537	DMAP1	DNA methyltransferase 1 associated protein 1	1176.94	-0.514374	0.123252	-4.17337	3.00127e-05	9.74566e-05
FBgn0034564	CG9344	uncharacterized protein	856.048	-0.906126	0.21745	-4.16705	3.08567e-05	9.98833e-05
FBgn0034570	CG10543	uncharacterized protein	2322	-0.549523	0.218939	-2.50994	0.0120752	0.0234169
FBgn0034572	CG9346	uncharacterized protein	1023.59	-0.465354	0.104168	-4.46733	7.92027e-06	2.82431e-05
FBgn0034578	CG15653	uncharacterized protein	174.723	-0.748448	0.212512	-3.52191	0.00042845	0.00112402
FBgn0034579	mRpL54	mitochondrial ribosomal protein L54	981.333	-0.753445	0.200762	-3.75292	0.000174784	0.000494909
FBgn0034614	CG9752	uncharacterized protein	1120.69	-1.22822	0.144868	-8.47824	2.28627e-17	3.91192e-16
FBgn0034617	Panx	Panoramix	562.068	-0.553715	0.118911	-4.65654	3.21561e-06	1.22909e-05
FBgn0034627	eEFSec	eukaryotic translation elongation factor, selenocysteine-specific	170.09	-0.787023	0.143654	-5.4786	4.28692e-08	2.17293e-07
FBgn0034629	Acox57D-d	acyl-Coenzyme A oxidase at 57D distal	590.045	-1.36613	0.261181	-5.23057	1.68991e-07	7.80851e-07
FBgn0034631	TAF1C-like	TATA box-binding protein-associated factor RNA polymerase I subunit C-like	600.82	-0.841568	0.112596	-7.47422	7.76617e-14	8.57462e-13
FBgn0034634	CG10494	uncharacterized protein	316.114	-1.20846	0.23129	-5.22489	1.74255e-07	8.03079e-07
FBgn0034641	mahj	mahjong	4397.56	-0.968129	0.112287	-8.62193	6.58332e-18	1.18711e-16
FBgn0034646	Rae1	Rae1	1505.82	-0.43448	0.181444	-2.39457	0.0166399	0.031299
FBgn0034650	NC2alpha	Negative Cofactor 2alpha	493.631	-0.549233	0.135577	-4.05107	5.09832e-05	0.000158609
FBgn0034654	eIF3k	eukaryotic translation initiation factor 3 subunit k	3672.27	-0.467747	0.171983	-2.71973	0.00653355	0.0134091
FBgn0034674	CG9304	uncharacterized protein	908.241	-0.293397	0.108647	-2.70046	0.00692435	0.0141293
FBgn0034703	CG3045	uncharacterized protein	627.179	-1.33695	0.166406	-8.03427	9.41352e-16	1.33732e-14
FBgn0034705	CG11170	uncharacterized protein	204.553	-0.668386	0.198721	-3.36344	0.000769768	0.00192605
FBgn0034707	MED16	Mediator complex subunit 16	476.805	-0.393909	0.163556	-2.4084	0.0160227	0.0302806
FBgn0034722	Rtf1	Rtf1	1576.12	-0.378351	0.106221	-3.56191	0.00036816	0.000979124
FBgn0034726	Mes4	Mesoderm-expressed 4	289.04	-0.815203	0.203892	-3.99821	6.3823e-05	0.000195364
FBgn0034727	mRpS29	mitochondrial ribosomal protein S29	1574.16	-0.674558	0.138548	-4.86876	1.12299e-06	4.60648e-06
FBgn0034728	rad50	rad50	1291.24	-0.751026	0.239389	-3.13726	0.00170537	0.00396585
FBgn0034729	CG10344	uncharacterized protein	196.421	-0.973414	0.24745	-3.93379	8.36186e-05	0.000250998
FBgn0034734	CG4554	uncharacterized protein	4019.91	-1.20164	0.22701	-5.29335	1.20095e-07	5.6654e-07
FBgn0034735	CG4610	uncharacterized protein	742.499	-0.500913	0.170792	-2.93288	0.00335836	0.00735951
FBgn0034743	RpS16	Ribosomal protein S16	53876.8	-0.480351	0.193117	-2.48736	0.0128697	0.0247792
FBgn0034748	CG17807	uncharacterized protein	509.75	-0.708215	0.118966	-5.95307	2.63156e-09	1.56805e-08
FBgn0034763	RYBP	Ring and YY1 Binding Protein	847.235	-0.461221	0.0899428	-5.12794	2.92932e-07	1.31053e-06
FBgn0034786	CG13531	uncharacterized protein	1062.7	-0.447558	0.173481	-2.57986	0.00988404	0.0195441
FBgn0034792	YME1L	YME1 like ATPase	3515.4	-0.35965	0.103448	-3.47662	0.000507777	0.00131597
FBgn0034793	asrij	asrij	1229.56	-0.531087	0.148637	-3.57305	0.000352843	0.000942436
FBgn0034800	CG3788	uncharacterized protein	368.212	-1.77266	0.348509	-5.0864	3.64923e-07	1.6082e-06
FBgn0034802	CNBP	CCHC-type zinc finger nucleic acid binding protein	51942.6	-0.936908	0.137225	-6.82755	8.63757e-12	7.24456e-11
FBgn0034803	CG9849	uncharacterized protein	399.418	-0.471845	0.189313	-2.49241	0.012688	0.0244552
FBgn0034804	CG3831	uncharacterized protein	1399.1	-1.42255	0.280788	-5.06627	4.05691e-07	1.77524e-06
FBgn0034808	CG9896	uncharacterized protein	500.326	-1.39701	0.128272	-10.891	1.27228e-27	5.20167e-26
FBgn0034814	CG9890	uncharacterized protein	662.274	-0.721078	0.163354	-4.41421	1.01379e-05	3.54664e-05
FBgn0034816	CG3085	uncharacterized protein	236.021	-1.14685	0.223876	-5.12271	3.01182e-07	1.34259e-06
FBgn0034817	Art7	Arginine methyltransferase 7	1286.9	-0.738695	0.262385	-2.81531	0.00487297	0.0103226
FBgn0034853	Ice1	Interacts with the C terminus of ELL 1	1211.84	-1.19466	0.15113	-7.90486	2.68235e-15	3.62762e-14
FBgn0034856	yellow-d2	yellow-d2	59.2646	-0.636598	0.262634	-2.42389	0.0153551	0.0291111
FBgn0034859	CG3520	uncharacterized protein	715.804	-0.442396	0.133878	-3.30447	0.000951559	0.00232871
FBgn0034878	pita	pita	1153.12	-0.297501	0.135112	-2.20189	0.0276734	0.0494259
FBgn0034879	Rrp4	Rrp4	1996.37	-0.550304	0.238384	-2.30848	0.0209726	0.0385244
FBgn0034893	mRpL43	mitochondrial ribosomal protein L43	957.889	-0.57089	0.171726	-3.32442	0.000886035	0.00218824
FBgn0034894	sigmar	salivary glands marred	656.374	-0.664739	0.120962	-5.49542	3.89774e-08	1.99196e-07
FBgn0034908	CG5543	uncharacterized protein	526.088	-0.293567	0.130637	-2.2472	0.0246274	0.0444988
FBgn0034909	CG4797	uncharacterized protein	329.799	-0.695345	0.157194	-4.42348	9.7122e-06	3.40642e-05
FBgn0034915	eIF6	eukaryotic translation initiation factor 6	3077.19	-0.515107	0.15754	-3.26968	0.00107668	0.00260709
FBgn0034919	CG5569	uncharacterized protein	600.865	-0.562011	0.149913	-3.74891	0.000177608	0.000501871
FBgn0034923	Upf3	Upf3	848.325	-0.417086	0.167895	-2.48421	0.0129841	0.0249801
FBgn0034924	CG17658	uncharacterized protein	56.0961	-1.12028	0.309493	-3.61974	0.000294904	0.000799577
FBgn0034925	CG5339	uncharacterized protein	896.782	-0.593486	0.173567	-3.41936	0.000627696	0.00159932
FBgn0034933	CG3735	uncharacterized protein	1067.35	-0.937981	0.102465	-9.15415	5.47882e-20	1.18657e-18
FBgn0034936	Stoml2	Stomatin like 2	1887.47	-0.308581	0.129036	-2.39143	0.016783	0.0315108
FBgn0034939	thoc5	thoc5	730.24	-0.564367	0.0864169	-6.53075	6.5443e-11	4.8662e-10
FBgn0034962	MAN1	MAN1	2084.58	-0.772307	0.163743	-4.71658	2.3984e-06	9.37859e-06
FBgn0034963	Not11	CCR4-NOT transcription complex subunit 11	431.653	-0.637782	0.172829	-3.69025	0.000224037	0.000621306
FBgn0034965	ppk29	pickpocket 29	216.303	-1.24798	0.238808	-5.22589	1.73323e-07	7.99078e-07
FBgn0034966	CG13563	uncharacterized protein	168.967	-1.50372	0.214005	-7.02656	2.11681e-12	1.94388e-11
FBgn0034968	RpL12	Ribosomal protein L12	38283.2	-0.506906	0.14599	-3.47221	0.000516195	0.00133527
FBgn0034988	cN-IIIB	cytosolic 5'-nucleotidase IIIB	775.986	-0.589844	0.127977	-4.60897	4.04663e-06	1.51954e-05
FBgn0035016	CG4612	uncharacterized protein	3428.75	-0.566943	0.110781	-5.1177	3.09284e-07	1.37722e-06
FBgn0035021	CG4622	uncharacterized protein	438.082	-0.346011	0.0875257	-3.95325	7.70963e-05	0.000232663
FBgn0035024	CG11414	uncharacterized protein	2431.49	-0.356044	0.109319	-3.25694	0.00112619	0.00271849
FBgn0035025	uri	unconventional prefoldin RPB5 interactor	816.734	-0.944986	0.119952	-7.87804	3.32562e-15	4.42987e-14
FBgn0035026	Fcp1	TFIIF-interacting CTD phosphatase	1189.91	-0.475313	0.106156	-4.4775	7.55239e-06	2.70323e-05
FBgn0035027	CG3511	uncharacterized protein	835.056	-0.624519	0.0923569	-6.76202	1.36084e-11	1.11201e-10
FBgn0035036	CG4707	uncharacterized protein	398.228	-0.841861	0.136907	-6.14916	7.78953e-10	4.98433e-09
FBgn0035039	Adck	aarF domain containing kinase	1017.33	-1.24565	0.16568	-7.51844	5.54318e-14	6.22002e-13
FBgn0035044	CG3663	uncharacterized protein	542.465	-0.654456	0.189466	-3.45421	0.000551905	0.00141817
FBgn0035047	Pof	Painting of fourth	497.433	-0.352524	0.134806	-2.61504	0.00892165	0.0177945
FBgn0035063	CG3594	uncharacterized protein	1021.58	-0.673013	0.220316	-3.05477	0.00225237	0.0050992
FBgn0035064	TyrRS-m	Tyrosyl-tRNA synthetase, mitochondrial	788.23	-0.422235	0.130739	-3.2296	0.00123962	0.002961
FBgn0035073	CG16896	uncharacterized protein	775.213	-1.1008	0.147448	-7.46571	8.28536e-14	9.0992e-13
FBgn0035083	Tina-1	Troponin C-akin-1	2551.48	-0.810272	0.267548	-3.02851	0.00245765	0.00551747
FBgn0035084	CG15861	uncharacterized protein	220.035	-0.423084	0.166531	-2.54058	0.011067	0.0215936
FBgn0035099	CG6845	uncharacterized protein	536.062	-0.492444	0.195974	-2.5128	0.0119777	0.0232498
FBgn0035109	CG13876	uncharacterized protein	199.635	-0.566826	0.207879	-2.7267	0.00639702	0.0131536
FBgn0035110	thoc7	thoc7	991.928	-0.54381	0.115651	-4.70218	2.57403e-06	1.00179e-05
FBgn0035111	Dis3l2	Dis3 like 3'-5' exoribonuclease 2	1766.57	-0.443227	0.116518	-3.80395	0.000142406	0.000409501
FBgn0035120	wac	wee Augmin	625.884	-1.21166	0.200634	-6.03919	1.54888e-09	9.49405e-09
FBgn0035121	Tudor-SN	Tudor staphylococcal nuclease	17540.9	-0.830823	0.13478	-6.16428	7.08042e-10	4.56359e-09
FBgn0035122	mRpL17	mitochondrial ribosomal protein L17	1008.15	-0.723795	0.225579	-3.20861	0.00133378	0.00317137
FBgn0035137	CG1233	uncharacterized protein	836.617	-0.427224	0.135602	-3.15056	0.00162956	0.00380743
FBgn0035141	Cypl	Cyclophilin-like	414.249	-0.496395	0.146902	-3.37908	0.000727285	0.00182825
FBgn0035148	CG3402	uncharacterized protein	742.406	-0.612283	0.200883	-3.04795	0.00230407	0.00520284
FBgn0035149	MED30	Mediator complex subunit 30	521.838	-0.333799	0.141005	-2.36728	0.0179195	0.0334167
FBgn0035151	CG17129	uncharacterized protein	212.713	-0.891401	0.175883	-5.06814	4.01723e-07	1.75912e-06
FBgn0035153	ebd1	earthbound 1	1479.85	-0.54902	0.131651	-4.17025	3.04263e-05	9.86703e-05
FBgn0035158	CG13895	uncharacterized protein	599.573	-0.476771	0.107112	-4.45116	8.54077e-06	3.029e-05
FBgn0035162	Sf3b3	Splicing factor 3b subunit 3	19151.8	-1.19608	0.149479	-8.00168	1.22736e-15	1.72778e-14
FBgn0035164	CG13901	uncharacterized protein	961.614	-0.71976	0.158144	-4.55129	5.33181e-06	1.95937e-05
FBgn0035169	Dci	Dodecenoyl-CoA delta-isomerase	746.582	-0.793415	0.248918	-3.18746	0.00143528	0.00338672
FBgn0035194	Psf1	Psf1	227.642	-0.656192	0.293796	-2.2335	0.0255162	0.0459491
FBgn0035204	CG2277	uncharacterized protein	931.996	-0.29365	0.102977	-2.85161	0.00434985	0.00929739
FBgn0035205	Ctr9	Ctr9	3487.07	-0.70952	0.149367	-4.75017	2.03249e-06	8.02375e-06
FBgn0035206	CG9186	uncharacterized protein	959.908	-0.635031	0.187259	-3.39119	0.0006959	0.00175398
FBgn0035209	msd1	mitotic spindle density 1	257.068	-0.939204	0.211948	-4.43129	9.36696e-06	3.2956e-05
FBgn0035210	msd5	mitotic spindle density 5	383.063	-0.982308	0.255232	-3.84868	0.000118754	0.000346147
FBgn0035211	CG2211	uncharacterized protein	440.669	-0.671716	0.180308	-3.72539	0.000195013	0.000547185
FBgn0035213	CG2199	uncharacterized protein	2494.97	-1.33161	0.17153	-7.76314	8.28519e-15	1.04625e-13
FBgn0035235	CG7879	uncharacterized protein	695.584	-0.280975	0.110713	-2.53788	0.0111526	0.0217504
FBgn0035247	metl	methyltransferase-like	924.103	-0.717437	0.164619	-4.35816	1.31163e-05	4.51849e-05
FBgn0035254	CG7974	uncharacterized protein	375.661	-0.899974	0.291243	-3.09011	0.00200082	0.00457902
FBgn0035264	Oseg4	Outer segment 4	235.897	-1.59971	0.492361	-3.24906	0.00115789	0.00278199
FBgn0035268	CG8001	uncharacterized protein	871.491	-0.253504	0.0934048	-2.71404	0.00664679	0.0136258
FBgn0035270	CG13933	uncharacterized protein	956.368	-0.53667	0.0981553	-5.46756	4.56279e-08	2.30052e-07
FBgn0035271	CG2021	uncharacterized protein	611.184	-1.49216	0.273781	-5.45019	5.03157e-08	2.51538e-07
FBgn0035272	mRpL46	mitochondrial ribosomal protein L46	1286.98	-0.443335	0.160808	-2.75692	0.00583493	0.0121219
FBgn0035290	dsb	debris buster	50.971	-1.17789	0.340522	-3.45907	0.000542036	0.00139484
FBgn0035295	Cnb	Centrobin	829.34	-1.36938	0.144702	-9.46342	2.98031e-21	7.26774e-20
FBgn0035308	CG15822	uncharacterized protein	1070.3	-2.41242	0.411135	-5.86772	4.41836e-09	2.53807e-08
FBgn0035312	CG15820	uncharacterized protein	292.862	-1.95838	0.333209	-5.87733	4.16941e-09	2.40348e-08
FBgn0035335	mRpL23	mitochondrial ribosomal protein L23	935.381	-1.06848	0.181581	-5.88431	3.99716e-09	2.31495e-08
FBgn0035336	CG9004	uncharacterized protein	1386.33	-1.21299	0.187761	-6.46026	1.04526e-10	7.55022e-10
FBgn0035337	CG15877	uncharacterized protein	668.649	-0.822417	0.10173	-8.08434	6.25029e-16	9.07721e-15
FBgn0035374	mRpS35	mitochondrial ribosomal protein S35	1430.27	-0.491014	0.14861	-3.30405	0.000952978	0.00233172
FBgn0035383	CPT2	Carnitine palmitoyltransferase 2	956.953	-0.417684	0.135708	-3.0778	0.00208534	0.00475924
FBgn0035393	CG16753	uncharacterized protein	878.951	-1.33831	0.288429	-4.64001	3.48388e-06	1.31983e-05
FBgn0035405	CG15812	uncharacterized protein	580.089	-0.337272	0.0970163	-3.47645	0.000508108	0.00131655
FBgn0035407	Asciz	ASCIZ zinc finger protein	231.634	-0.688629	0.202272	-3.40446	0.00066294	0.00167773
FBgn0035414	CG14965	uncharacterized protein	160.113	-0.592581	0.163753	-3.61874	0.000296039	0.000802478
FBgn0035415	CG14966	uncharacterized protein	393.679	-0.969758	0.219749	-4.41303	1.01933e-05	3.56204e-05
FBgn0035421	nSMase	neutral sphingomyelinase	1077.15	-0.397734	0.108335	-3.67132	0.000241303	0.000666501
FBgn0035422	RpL28	Ribosomal protein L28	39201	-0.441524	0.150643	-2.93093	0.00337951	0.00740063
FBgn0035423	eIF1	eukaryotic translation initiation factor 1	6363.84	-0.764988	0.237671	-3.21869	0.0012878	0.00306792
FBgn0035443	CG12010	uncharacterized protein	419.804	-0.88217	0.11718	-7.52835	5.13848e-14	5.80269e-13
FBgn0035449	CG14971	uncharacterized protein	666.827	-0.281063	0.113913	-2.46736	0.0136115	0.0260899
FBgn0035462	IntS10	Integrator 10	322.914	-0.493989	0.0805422	-6.1333	8.60735e-10	5.4681e-09
FBgn0035464	PIG-B	Phosphatidylinositol glycan anchor biosynthesis class B	1508.7	-0.261721	0.118237	-2.21353	0.0268614	0.0481213
FBgn0035470	Ccz1	Caffeine, calcium, zinc sensitivity 1	547.242	-0.555264	0.159729	-3.47628	0.000508412	0.00131707
FBgn0035473	mge	maggie	3922.13	-0.561166	0.140427	-3.99614	6.4385e-05	0.00019689
FBgn0035488	CG11593	uncharacterized protein	694.067	-0.390581	0.0726851	-5.3736	7.71803e-08	3.75534e-07
FBgn0035520	CG11586	uncharacterized protein	482.389	-0.355439	0.14364	-2.47451	0.0133419	0.0256446
FBgn0035524	NA	NA	2645.32	-1.16023	0.148863	-7.79395	6.49467e-15	8.28589e-14
FBgn0035532	CG15014	uncharacterized protein	1393.37	-1.05715	0.169405	-6.24036	4.36554e-10	2.90077e-09
FBgn0035534	mRpS6	mitochondrial ribosomal protein S6	724.677	-0.53781	0.208535	-2.57899	0.00990886	0.0195893
FBgn0035537	CG11342	uncharacterized protein	185.63	-1.44766	0.265231	-5.45811	4.81223e-08	2.41939e-07
FBgn0035541	CG15019	uncharacterized protein	3247.02	-1.1267	0.232808	-4.83961	1.30092e-06	5.29256e-06
FBgn0035574	RhoGEF64C	Rho guanine nucleotide exchange factor at 64C	479.889	-1.39756	0.39675	-3.52251	0.00042748	0.00112195
FBgn0035590	Prpk	p53-related protein kinase	525.155	-0.476967	0.199602	-2.38958	0.0168674	0.0316357
FBgn0035591	CG4611	uncharacterized protein	724.053	-0.433048	0.122679	-3.52993	0.000415674	0.00109421
FBgn0035592	CG10674	uncharacterized protein	900.216	-0.376066	0.156359	-2.40515	0.0161659	0.0305141
FBgn0035601	Uev1A	Ubiquitin-conjugating enzyme variant 1A	7195.43	-0.535932	0.184997	-2.89698	0.00376773	0.00816132
FBgn0035617	l(3)psg2	lethal (3) persistent salivary gland 2	1425.36	-0.808054	0.222358	-3.63402	0.00027904	0.000761398
FBgn0035624	Eaf6	Esa1-associated factor 6	252.197	-0.504137	0.150393	-3.35212	0.000801958	0.00199973
FBgn0035627	Sse	Separase	275.239	-0.871434	0.172771	-5.04386	4.5624e-07	1.98243e-06
FBgn0035630	CG10576	uncharacterized protein	21601.6	-1.02129	0.216561	-4.71595	2.40585e-06	9.4018e-06
FBgn0035631	Txl	Thioredoxin-like	3124.97	-0.46685	0.124516	-3.74933	0.00017731	0.000501258
FBgn0035640	mad2	mad2	372.198	-0.76307	0.137685	-5.54213	2.98821e-08	1.54822e-07
FBgn0035641	CG5568	uncharacterized protein	359.09	-2.20741	0.629836	-3.50473	0.000457066	0.00119303
FBgn0035642	CG18586	uncharacterized protein	381.445	-2.64238	0.464605	-5.68737	1.29011e-08	6.96377e-08
FBgn0035644	DNApol-epsilon58	DNA polymerase epsilon 58kD subunit	440.585	-0.934252	0.13098	-7.13276	9.83754e-13	9.46175e-12
FBgn0035675	CG6610	uncharacterized protein	632.553	-1.14465	0.244322	-4.68502	2.79932e-06	1.08271e-05
FBgn0035690	CG10274	uncharacterized protein	582.359	-0.430202	0.121683	-3.53544	0.000407104	0.00107371
FBgn0035691	CG7386	uncharacterized protein	140.06	-0.814586	0.186349	-4.3713	1.23507e-05	4.26543e-05
FBgn0035692	Sf3b6	Splicing factor 3b subunit 6	2614	-0.788631	0.194897	-4.0464	5.20112e-05	0.000161726
FBgn0035703	CG8270	uncharacterized protein	448.57	-0.460743	0.0922519	-4.9944	5.90175e-07	2.5202e-06
FBgn0035714	CG8549	uncharacterized protein	711.418	-0.644628	0.198581	-3.24617	0.0011697	0.00280873
FBgn0035722	CG10075	uncharacterized protein	604.662	-0.513755	0.151483	-3.39149	0.000695131	0.0017524
FBgn0035726	CG9953	uncharacterized protein	6016.8	-0.621227	0.152982	-4.06079	4.89077e-05	0.000152843
FBgn0035760	CG8607	uncharacterized protein	349.266	-0.514557	0.176843	-2.90968	0.00361801	0.0078625
FBgn0035761	RhoGEF4	Rho guanine nucleotide exchange factor 4	739.79	-1.80637	0.171253	-10.548	5.18985e-26	1.88539e-24
FBgn0035762	Rint1	RAD50 interactor 1	770.395	-0.348307	0.0830655	-4.19317	2.75088e-05	8.99628e-05
FBgn0035766	eco	Establishment of cohesion	2608.46	-0.672033	0.13102	-5.12923	2.90929e-07	1.3025e-06
FBgn0035768	CG14834	uncharacterized protein	153.152	-1.47571	0.327804	-4.5018	6.73796e-06	2.43211e-05
FBgn0035769	CTCF	CTCF	1075.99	-0.520636	0.150197	-3.46636	0.000527555	0.00136178
FBgn0035805	CG7506	uncharacterized protein	628.74	-0.481824	0.203054	-2.37288	0.0176499	0.0329535
FBgn0035812	CG7457	uncharacterized protein	860.529	-0.730151	0.188898	-3.86531	0.000110946	0.000325148
FBgn0035827	Srp9	Signal recognition particle protein 9	1239.22	-0.860073	0.246315	-3.49176	0.000479841	0.00125011
FBgn0035829	HP4	Heterochromatin protein 4	829.793	-0.699626	0.136786	-5.11476	3.14136e-07	1.39731e-06
FBgn0035831	CG8038	uncharacterized protein	361.64	-0.632807	0.243143	-2.60261	0.00925163	0.0183727
FBgn0035838	ldbr	lariat debranching enzyme	387.321	-1.15398	0.162381	-7.10665	1.18896e-12	1.13298e-11
FBgn0035842	CG7504	uncharacterized protein	703.308	-0.911213	0.223377	-4.07926	4.51794e-05	0.000142124
FBgn0035851	MED24	Mediator complex subunit 24	857.483	-0.611428	0.115412	-5.2978	1.17207e-07	5.54819e-07
FBgn0035854	CG8005	uncharacterized protein	658.674	-1.09948	0.12892	-8.52838	1.48411e-17	2.59311e-16
FBgn0035855	CG7366	uncharacterized protein	33.3478	-1.47142	0.602921	-2.44048	0.0146677	0.0278857
FBgn0035876	Pex2	Peroxin 2	281.221	-0.34556	0.112182	-3.08034	0.00206766	0.00472324
FBgn0035878	CG7182	uncharacterized protein	4024.44	-0.749772	0.168284	-4.45541	8.37332e-06	2.97393e-05
FBgn0035888	CG7120	uncharacterized protein	1802.61	-0.436981	0.148174	-2.9491	0.00318697	0.00702119
FBgn0035889	mkg-p	monkey king protein	908.43	-0.451365	0.0831991	-5.42512	5.79171e-08	2.86876e-07
FBgn0035890	CG13667	uncharacterized protein	441.145	-0.838801	0.22448	-3.73664	0.000186495	0.00052483
FBgn0035901	Pus7	Pseudouridine synthase 7	2390.8	-1.18469	0.200836	-5.89881	3.66129e-09	2.13541e-08
FBgn0035907	GstO1	Glutathione S transferase O1	546.332	-1.39419	0.20128	-6.9266	4.31066e-12	3.7819e-11
FBgn0035911	CG6638	uncharacterized protein	1113.93	-0.484212	0.132481	-3.65495	0.000257235	0.00070704
FBgn0035918	Cdc6	Cdc6	547.808	-0.76184	0.134167	-5.6783	1.36038e-08	7.32714e-08
FBgn0035923	CG6511	uncharacterized protein	808.346	-0.712899	0.139123	-5.12425	2.98718e-07	1.33304e-06
FBgn0035936	Tsp66E	Tetraspanin 66E	1627.16	-1.7636	0.251898	-7.00126	2.53664e-12	2.3038e-11
FBgn0035942	ValRS-m	Valyl-tRNA synthetase, mitochondrial	258.371	-0.426576	0.172584	-2.4717	0.0134471	0.0258225
FBgn0035947	Srp68	Signal recognition particle protein 68	4017.79	-0.479256	0.128084	-3.74172	0.000182762	0.000515377
FBgn0035955	CG5194	uncharacterized protein	627.715	-1.37162	0.196971	-6.96356	3.31791e-12	2.95063e-11
FBgn0035959	CG4911	uncharacterized protein	1982.98	-0.774544	0.202928	-3.81684	0.00013517	0.000390506
FBgn0035960	CG4942	uncharacterized protein	160.002	-0.952449	0.158595	-6.00553	1.90709e-09	1.15469e-08
FBgn0035965	Use1	Unconventional SNARE in the ER 1	320.32	-0.394999	0.151544	-2.6065	0.00914734	0.0181794
FBgn0035980	mRRF1	mitochondrial ribosome recycling factor 1	387.113	-0.991965	0.153983	-6.44204	1.17881e-10	8.43138e-10
FBgn0035981	CG4452	uncharacterized protein	1550.72	-0.448167	0.126054	-3.55537	0.000377452	0.00100255
FBgn0035987	Cpsf5	Cleavage and polyadenylation specific factor 5	3688.31	-0.816789	0.13079	-6.24503	4.23718e-10	2.82054e-09
FBgn0035997	phol	pleiohomeotic like	1404.06	-0.48012	0.118795	-4.04159	5.30907e-05	0.00016471
FBgn0036000	CG3434	uncharacterized protein	896.91	-0.964244	0.166444	-5.79319	6.90617e-09	3.85377e-08
FBgn0036007	path	pathetic	11458	-1.37819	0.180826	-7.62161	2.50532e-14	2.98997e-13
FBgn0036008	CG3408	uncharacterized protein	1002.03	-0.716992	0.116849	-6.13607	8.4586e-10	5.38188e-09
FBgn0036018	CG3335	uncharacterized protein	2003.83	-1.20173	0.176649	-6.80289	1.02541e-11	8.529e-11
FBgn0036020	CG8336	uncharacterized protein	685.882	-0.454946	0.0844693	-5.38593	7.20706e-08	3.51916e-07
FBgn0036029	CG16719	uncharacterized protein	43.3618	-2.15278	0.422973	-5.08963	3.58765e-07	1.58502e-06
FBgn0036030	CG6767	uncharacterized protein	12429.5	-1.73727	0.232502	-7.47206	7.89473e-14	8.6856e-13
FBgn0036035	CG18178	uncharacterized protein	2095.91	-0.793873	0.147199	-5.3932	6.92143e-08	3.38904e-07
FBgn0036036	CG14174	uncharacterized protein	302.297	-0.758543	0.154173	-4.92006	8.65164e-07	3.62328e-06
FBgn0036038	defl	deflated	823.473	-0.439985	0.0986039	-4.46214	8.11445e-06	2.89022e-05
FBgn0036039	Naa60	N(alpha)-acetyltransferase 60	713.276	-0.377581	0.0723637	-5.21783	1.81034e-07	8.32462e-07
FBgn0036043	CG8177	uncharacterized protein	3039.9	-0.573733	0.179796	-3.19102	0.00141771	0.00334909
FBgn0036052	CG10809	uncharacterized protein	671.161	-0.301799	0.090079	-3.35038	0.00080701	0.00201152
FBgn0036062	CG6685	uncharacterized protein	223.982	-0.53043	0.175831	-3.01671	0.00255538	0.00571718
FBgn0036096	CG8003	uncharacterized protein	2227.87	-0.721285	0.107392	-6.71635	1.86338e-11	1.49505e-10
FBgn0036099	CG11811	uncharacterized protein	2086.41	-0.570952	0.116408	-4.90474	9.35508e-07	3.89287e-06
FBgn0036105	Blos4	Biogenesis of lysosome-related organelles complex 1, subunit 4	169.63	-1.14349	0.298917	-3.82543	0.000130544	0.000378463
FBgn0036111	Aps	Aps	8930.17	-0.779701	0.166415	-4.68529	2.79568e-06	1.08194e-05
FBgn0036124	CG7839	uncharacterized protein	4952.52	-1.32219	0.159923	-8.26765	1.36627e-16	2.13705e-15
FBgn0036128	Elo68beta	Elongase 68beta	23.4688	-3.35154	1.03475	-3.23897	0.0011996	0.00287496
FBgn0036134	FoxK	Forkhead box K	3493.82	-0.652873	0.144915	-4.50521	6.63069e-06	2.39828e-05
FBgn0036144	GlcAT-P	Glucuronyltransferase P	922.272	-0.358507	0.102735	-3.48965	0.000483654	0.00125872
FBgn0036145	CG7607	uncharacterized protein	130.817	-0.678398	0.283281	-2.39479	0.01663	0.0312934
FBgn0036146	CG14141	uncharacterized protein	108.828	-1.39347	0.257776	-5.40574	6.45402e-08	3.17902e-07
FBgn0036147	Plod	procollagen lysyl hydroxylase	11932.4	-1.18259	0.129324	-9.14439	5.99687e-20	1.29424e-18
FBgn0036150	Ir68a	Ionotropic receptor 68a	11.5394	-1.49949	0.600622	-2.49655	0.0125407	0.024221
FBgn0036152	CG6175	uncharacterized protein	2901.51	-1.74448	0.142633	-12.2305	2.13523e-34	1.4298e-32
FBgn0036173	CG7394	uncharacterized protein	1150.87	-0.606514	0.231928	-2.6151	0.00892025	0.0177945
FBgn0036184	PCID2	PCI domain-containing protein 2	515.602	-0.507649	0.124246	-4.08584	4.39176e-05	0.000138647
FBgn0036187	RIOK1	RIO kinase 1	1531.66	-1.01407	0.1448	-7.00323	2.50136e-12	2.2751e-11
FBgn0036188	CG7339	uncharacterized protein	1080.26	-1.11188	0.232908	-4.77389	1.80703e-06	7.20021e-06
FBgn0036191	Sugb	Sugar baby	5331.65	-1.42085	0.142018	-10.0047	1.45367e-23	4.38153e-22
FBgn0036193	CG14135	uncharacterized protein	177.28	-0.662921	0.20809	-3.18574	0.00144385	0.00340433
FBgn0036199	Bmcp	bmcp	1058.39	-0.281483	0.117703	-2.39146	0.0167815	0.0315108
FBgn0036202	CG6024	uncharacterized protein	64.0778	-1.9746	0.271957	-7.2607	3.85083e-13	3.86894e-12
FBgn0036207	CG10907	uncharacterized protein	400.615	-0.782371	0.156718	-4.99222	5.96889e-07	2.54536e-06
FBgn0036212	CG11597	uncharacterized protein	146.422	-0.80626	0.287305	-2.80629	0.00501155	0.0105817
FBgn0036213	RpL10Ab	Ribosomal protein L10Ab	54973.1	-0.478245	0.130006	-3.67865	0.000234472	0.000648792
FBgn0036214	CG7264	uncharacterized protein	17.8795	-1.86652	0.547445	-3.40951	0.000650808	0.00165006
FBgn0036219	CCDC151	Coiled-coil domain containing protein 151	1.2508	-3.35217	1.5229	-2.20117	0.027724	0.0495091
FBgn0036240	CG6928	uncharacterized protein	407.156	-0.36382	0.12178	-2.98751	0.00281259	0.00624656
FBgn0036248	ssp	sunspot	724.419	-0.854909	0.206046	-4.14911	3.33764e-05	0.000107283
FBgn0036254	CG5645	uncharacterized protein	1295.57	-1.39088	0.186134	-7.47247	7.8706e-14	8.66676e-13
FBgn0036258	eIF3l	eukaryotic translation initiation factor 3 subunit l	9180.81	-0.474395	0.0955655	-4.96408	6.90277e-07	2.91649e-06
FBgn0036263	thoc6	thoc6	930.051	-1.14951	0.170782	-6.73089	1.68627e-11	1.36e-10
FBgn0036266	CG5626	uncharacterized protein	324.845	-1.1705	0.186699	-6.26946	3.62297e-10	2.4392e-09
FBgn0036272	Sms	Spermine synthase	4335.43	-0.672904	0.160143	-4.20189	2.64697e-05	8.68503e-05
FBgn0036277	CG10418	uncharacterized protein	804.773	-0.942997	0.210793	-4.47358	7.69214e-06	2.74849e-05
FBgn0036294	CG10654	uncharacterized protein	411.904	-0.826861	0.300547	-2.75118	0.00593803	0.0123175
FBgn0036301	CG4069	uncharacterized protein	2430.37	-1.31145	0.190317	-6.89088	5.54485e-12	4.8102e-11
FBgn0036306	CG10973	uncharacterized protein	582.379	-0.662322	0.127721	-5.1857	2.15206e-07	9.78697e-07
FBgn0036314	Sf3a2	Splicing factor 3a subunit 2	1149.73	-0.303714	0.126223	-2.40617	0.0161206	0.0304377
FBgn0036316	CG10960	uncharacterized protein	2151.15	-0.524053	0.23043	-2.27424	0.0229517	0.041745
FBgn0036324	CG12520	uncharacterized protein	17.5428	-1.91094	0.459664	-4.15725	3.22096e-05	0.000103855
FBgn0036330	CG11263	uncharacterized protein	294.13	-2.4411	0.428301	-5.69949	1.20163e-08	6.50318e-08
FBgn0036332	Cul6	Cullin 6	322.303	-0.830565	0.234353	-3.54408	0.00039399	0.00104245
FBgn0036334	CG11267	uncharacterized protein	6631.78	-0.954591	0.2127	-4.48797	7.19044e-06	2.58339e-05
FBgn0036335	mRpL20	mitochondrial ribosomal protein L20	1248.63	-0.890377	0.210479	-4.23024	2.33442e-05	7.74265e-05
FBgn0036336	ste14	isoprenylcysteine carboxylmethyltransferase	358.517	-0.363841	0.121594	-2.99226	0.00276918	0.00616214
FBgn0036337	AdenoK	Adenosine Kinase	2863.71	-0.378982	0.15045	-2.51899	0.0117692	0.0228772
FBgn0036342	CG11279	uncharacterized protein	1049.63	-1.47277	0.308814	-4.76912	1.85032e-06	7.36562e-06
FBgn0036356	CG10222	uncharacterized protein	207.108	-0.779785	0.252034	-3.09397	0.00197499	0.00452658
FBgn0036366	JMJD7	Jumonji domain containing 7	435.942	-0.906709	0.204606	-4.4315	9.35803e-06	3.29339e-05
FBgn0036386	CG8833	uncharacterized protein	514.082	-0.873547	0.138973	-6.28573	3.26312e-10	2.20653e-09
FBgn0036389	ssp2	short spindle 2	4046.49	-0.843843	0.0944474	-8.93453	4.08896e-19	8.19644e-18
FBgn0036395	CG17361	uncharacterized protein	200.692	-0.468314	0.203958	-2.29613	0.0216685	0.0396675
FBgn0036396	CG17359	uncharacterized protein	237.266	-0.699629	0.212001	-3.30012	0.000966435	0.00236185
FBgn0036402	CG6650	uncharacterized protein	1018.57	-0.404521	0.138581	-2.91902	0.00351135	0.0076582
FBgn0036405	CG6833	uncharacterized protein	574.07	-0.658442	0.136632	-4.81909	1.44213e-06	5.83829e-06
FBgn0036406	CG13484	uncharacterized protein	211.277	-0.634763	0.207718	-3.05589	0.00224391	0.00508275
FBgn0036423	CG3919	uncharacterized protein	186.505	-1.07505	0.186458	-5.76562	8.13559e-09	4.49927e-08
FBgn0036436	CG4914	uncharacterized protein	12.3728	-1.83689	0.551272	-3.33209	0.000861961	0.00213412
FBgn0036460	CG5114	uncharacterized protein	2540.52	-0.934634	0.155065	-6.02739	1.66628e-09	1.01534e-08
FBgn0036462	mRpL39	mitochondrial ribosomal protein L39	1484.63	-0.857111	0.126207	-6.79134	1.11099e-11	9.18143e-11
FBgn0036476	sstn	stepping stone	435.975	-0.836951	0.147106	-5.68944	1.27459e-08	6.886e-08
FBgn0036480	Cep135	Centrosomal protein 135kDa	574.746	-0.707673	0.144984	-4.88104	1.05526e-06	4.34595e-06
FBgn0036483	CG12316	uncharacterized protein	1154.67	-0.875814	0.124493	-7.03502	1.99226e-12	1.8418e-11
FBgn0036484	Pex3	Peroxin 3	1087.38	-0.253683	0.0758491	-3.34457	0.000824092	0.00204956
FBgn0036486	Msh6	Msh6	1295.01	-0.662067	0.149296	-4.4346	9.22432e-06	3.25095e-05
FBgn0036487	Prp31	Pre-mRNA processing factor 31	1642.07	-0.279693	0.101659	-2.7513	0.00593594	0.0123153
FBgn0036488	CG6878	uncharacterized protein	989.133	-0.459854	0.144413	-3.1843	0.00145104	0.00341999
FBgn0036493	CG7255	uncharacterized protein	2020.73	-1.4234	0.147005	-9.68264	3.57369e-22	9.26168e-21
FBgn0036500	CG7275	uncharacterized protein	1391.45	-0.78945	0.143466	-5.50268	3.74056e-08	1.91638e-07
FBgn0036502	CG7841	uncharacterized protein	639.408	-1.02233	0.107716	-9.49099	2.28843e-21	5.61369e-20
FBgn0036504	yellow-k	yellow-k	28.8325	-1.43684	0.456783	-3.14556	0.00165769	0.00386804
FBgn0036510	SCCRO	Squamous cell carcinoma-related oncogene	933.661	-0.485127	0.159275	-3.04584	0.00232031	0.00523761
FBgn0036514	CG12301	uncharacterized protein	2078.28	-1.07979	0.170899	-6.31829	2.64474e-10	1.81211e-09
FBgn0036515	AIMP2	aaRS-interacting multifunctional protein 2	2396.03	-0.508894	0.159458	-3.1914	0.00141585	0.00334724
FBgn0036518	RhoGAP71E	Rho GTPase activating protein at 71E	2897.77	-0.293978	0.12566	-2.33948	0.0193106	0.0357846
FBgn0036522	CG7372	uncharacterized protein	1724.37	-1.20738	0.180063	-6.7053	2.00996e-11	1.59714e-10
FBgn0036536	CG12713	uncharacterized protein	241.638	-1.25964	0.230227	-5.47129	4.46783e-08	2.26001e-07
FBgn0036537	CG18081	uncharacterized protein	2452.71	-0.891151	0.247633	-3.59867	0.000319843	0.000861352
FBgn0036538	CG15715	uncharacterized protein	1621.04	-1.17403	0.171878	-6.83062	8.45485e-12	7.10575e-11
FBgn0036544	sff	sugar-free frosting	52.5203	-1.34313	0.297927	-4.50824	6.53679e-06	2.36639e-05
FBgn0036557	mRpS31	mitochondrial ribosomal protein S31	1376.54	-0.428874	0.108772	-3.94287	8.05107e-05	0.000242138
FBgn0036565	CG5235	uncharacterized protein	563.077	-1.00494	0.159739	-6.29113	3.15171e-10	2.13702e-09
FBgn0036569	IleRS-m	Isoleucyl-tRNA synthetase, mitochondrial	651.483	-0.701301	0.11855	-5.91564	3.30589e-09	1.94368e-08
FBgn0036570	IntS9	Integrator 9	592.967	-0.415789	0.0992636	-4.18873	2.80515e-05	9.15444e-05
FBgn0036574	elg1	enhanced level of genomic instability 1	1855.13	-1.24743	0.173138	-7.20482	5.81227e-13	5.73267e-12
FBgn0036612	CG4998	uncharacterized protein	26.733	-1.82874	0.724727	-2.52334	0.0116245	0.0226136
FBgn0036614	Golgin104	Golgin 104	454.781	-0.367092	0.158929	-2.30979	0.0209001	0.0384139
FBgn0036622	Agpat4	1-Acylglycerol-3-phosphate O-acyltransferase 4	1341.04	-0.985397	0.213132	-4.62341	3.77487e-06	1.4218e-05
FBgn0036624	RAF2	RING-associated factor 2	1247.4	-0.398388	0.171193	-2.32713	0.0199583	0.0368636
FBgn0036629	GluRS-m	Glutamyl-tRNA synthetase, mitochondrial	207.143	-0.508249	0.144094	-3.52721	0.000419956	0.00110337
FBgn0036641	Smn	survival motor neuron	1329.75	-1.20983	0.228713	-5.28973	1.22495e-07	5.76763e-07
FBgn0036661	CG9705	uncharacterized protein	3090.01	-0.360112	0.0958319	-3.75775	0.000171451	0.000486026
FBgn0036667	kud	kuduk	1081.77	-0.931036	0.215512	-4.3201	1.55956e-05	5.2989e-05
FBgn0036668	Zcchc7	Zinc finger CCHC-type containing 7	3378.9	-1.07855	0.203657	-5.29593	1.18409e-07	5.59654e-07
FBgn0036671	CG9951	uncharacterized protein	816.287	-0.57466	0.160262	-3.58576	0.000336103	0.000901222
FBgn0036686	CG7728	uncharacterized protein	4391.23	-1.00621	0.158813	-6.33582	2.36083e-10	1.6284e-09
FBgn0036689	CG7730	uncharacterized protein	131.291	-0.6096	0.23824	-2.55876	0.0105046	0.0206262
FBgn0036691	beg	bad egg	849.248	-0.377251	0.161724	-2.33267	0.0196652	0.0363764
FBgn0036696	CG14057	uncharacterized protein	308.564	-0.983659	0.238364	-4.1267	3.68002e-05	0.000117465
FBgn0036710	CG6479	uncharacterized protein	786.373	-1.05641	0.131539	-8.03116	9.65523e-16	1.36696e-14
FBgn0036714	CG7692	uncharacterized protein	1007.59	-0.614483	0.165578	-3.71115	0.000206324	0.000575662
FBgn0036715	Cad74A	Cadherin 74A	202.564	-2.46648	0.409063	-6.02957	1.64394e-09	1.00321e-08
FBgn0036733	U4-U6-60K	U4-U6 small nuclear riboprotein factor 60K	1037.38	-0.673828	0.143403	-4.69884	2.61645e-06	1.01798e-05
FBgn0036735	Edc3	Enhancer of decapping 3	1293.11	-1.05558	0.146519	-7.2044	5.83017e-13	5.74576e-12
FBgn0036754	CG5589	uncharacterized protein	1620.9	-1.08274	0.195496	-5.5384	3.05242e-08	1.58083e-07
FBgn0036763	TrpRS-m	Tryptophanyl-tRNA synthetase, mitochondrial	840.397	-0.371911	0.132976	-2.79682	0.00516083	0.0108618
FBgn0036764	CG5535	uncharacterized protein	2219.48	-1.02733	0.131057	-7.83878	4.54949e-15	5.91386e-14
FBgn0036769	Tsp74F	Tetraspanin 74F	1774.5	-1.1101	0.1875	-5.92054	3.20895e-09	1.89027e-08
FBgn0036771	Wdr92	WD repeat domain 92	310.9	-0.38819	0.14068	-2.75939	0.00579095	0.0120392
FBgn0036772	CG5290	uncharacterized protein	1314.96	-0.84622	0.126636	-6.68231	2.35202e-11	1.84878e-10
FBgn0036773	CG13698	uncharacterized protein	1212.69	-0.4004	0.11127	-3.59844	0.00032013	0.000861937
FBgn0036774	mRpS26	mitochondrial ribosomal protein S26	1334.64	-0.647751	0.161781	-4.00388	6.23109e-05	0.000191161
FBgn0036775	RpIIIC53	RNA polymerase III subunit C53	1665.18	-0.674391	0.148682	-4.5358	5.7386e-06	2.0989e-05
FBgn0036793	CG4174	uncharacterized protein	98.783	-2.07161	0.27464	-7.54303	4.59193e-14	5.22358e-13
FBgn0036795	CG18233	uncharacterized protein	34.1364	-1.50088	0.622248	-2.41203	0.0158641	0.0299901
FBgn0036796	CG18231	uncharacterized protein	29.6791	-1.55991	0.704663	-2.21369	0.0268501	0.0481081
FBgn0036799	CG13380	uncharacterized protein	166.825	-1.95867	0.235205	-8.32749	8.25765e-17	1.34246e-15
FBgn0036812	Nufip	nufip	451.847	-1.40932	0.154606	-9.11558	7.82518e-20	1.66847e-18
FBgn0036814	CG14073	uncharacterized protein	1861.33	-0.796018	0.19124	-4.16241	3.1491e-05	0.000101724
FBgn0036815	HipHop	HP1-HOAP-interacting protein	1267.95	-1.11138	0.132842	-8.36619	5.95108e-17	9.8823e-16
FBgn0036824	CG3902	uncharacterized protein	6192.16	-0.853872	0.200574	-4.25714	2.07055e-05	6.90444e-05
FBgn0036825	RpL26	Ribosomal protein L26	45831.3	-0.387213	0.162605	-2.38131	0.0172513	0.0322727
FBgn0036826	arx	asterix	622.867	-1.08244	0.156395	-6.92119	4.47879e-12	3.91831e-11
FBgn0036827	CG6843	uncharacterized protein	498.586	-0.618017	0.177178	-3.48811	0.000486441	0.00126571
FBgn0036828	CG6841	uncharacterized protein	1456.9	-0.613024	0.123554	-4.96158	6.99231e-07	2.9513e-06
FBgn0036838	CG3808	uncharacterized protein	1787.78	-1.20599	0.122915	-9.81151	1.00452e-22	2.73495e-21
FBgn0036842	Ugt316A1	UDP-glycosyltransferase family 316 member A1	1180.78	-0.515773	0.109803	-4.69725	2.63686e-06	1.02496e-05
FBgn0036844	Mkp3	Mitogen-activated protein kinase phosphatase 3	1389.42	-0.911894	0.156121	-5.84095	5.19055e-09	2.94686e-08
FBgn0036848	Naxd	NAD(P)HX dehydratase	1013.15	-0.557384	0.185196	-3.00969	0.00261511	0.00584237
FBgn0036850	Gem2	Gemin2	338.636	-0.619853	0.150212	-4.12652	3.68301e-05	0.00011753
FBgn0036853	mRpL21	mitochondrial ribosomal protein L21	1153.41	-0.822242	0.185137	-4.44126	8.94342e-06	3.16004e-05
FBgn0036856	CG9666	uncharacterized protein	488.02	-0.526019	0.148439	-3.54368	0.000394589	0.00104359
FBgn0036886	CG9300	uncharacterized protein	2286.56	-1.30413	0.187246	-6.96478	3.28913e-12	2.92714e-11
FBgn0036888	CG9330	uncharacterized protein	3663.69	-0.467571	0.109388	-4.27443	1.91626e-05	6.42452e-05
FBgn0036889	CG14100	uncharacterized protein	787.502	-1.07764	0.123971	-8.69265	3.54091e-18	6.56659e-17
FBgn0036892	Lon	Lon protease	2530.16	-0.466934	0.0867015	-5.38553	7.223e-08	3.52555e-07
FBgn0036895	ms(3)76Cc	male sterile (3) 76Cc	13.4012	-1.04532	0.467093	-2.23793	0.0252253	0.0454929
FBgn0036896	wnd	wallenda	1028.19	-1.26814	0.18835	-6.7329	1.66319e-11	1.34313e-10
FBgn0036900	CG8765	uncharacterized protein	905.658	-0.616527	0.18042	-3.41717	0.000632748	0.0016112
FBgn0036906	CG14102	uncharacterized protein	232.861	-0.975489	0.200069	-4.87577	1.08387e-06	4.45784e-06
FBgn0036908	TORIP	Torsin interacting protein	971.888	-0.470903	0.153181	-3.07417	0.00211092	0.00481497
FBgn0036909	Ccdc58	Coiled-coil domain-containing 58	1071.62	-0.910616	0.256186	-3.55451	0.00037868	0.00100516
FBgn0036915	Prp3	Precursor RNA processing 3	1687.97	-0.487833	0.122109	-3.99508	6.46733e-05	0.000197723
FBgn0036916	Mtr3	Mtr3	923.371	-0.783866	0.177022	-4.42807	9.50787e-06	3.33948e-05
FBgn0036918	Pfdn6	Prefoldin 6	1786.07	-0.600183	0.244013	-2.45964	0.0139078	0.0265915
FBgn0036922	CG14182	uncharacterized protein	240.538	-0.401129	0.175107	-2.29076	0.0219771	0.0401671
FBgn0036928	Tom20	Translocase of outer membrane 20	4520.95	-0.497801	0.188459	-2.64142	0.00825584	0.0166055
FBgn0036942	CG7328	uncharacterized protein	229.53	-0.659476	0.178543	-3.69365	0.00022106	0.000613738
FBgn0036959	CG6951	uncharacterized protein	180.24	-1.09605	0.199014	-5.5074	3.6418e-08	1.86733e-07
FBgn0036973	Rbbp5	Retinoblastoma binding protein 5	593.805	-0.485718	0.11085	-4.38177	1.1772e-05	4.0735e-05
FBgn0036974	eRF1	eukaryotic translation release factor 1	8752.85	-0.6486	0.175158	-3.70294	0.000213112	0.000593266
FBgn0036990	mRpL15	mitochondrial ribosomal protein L15	1248.06	-0.614484	0.162733	-3.77603	0.000159349	0.000455158
FBgn0036991	CtIP	CTBP-interacting protein	377.67	-0.283257	0.113415	-2.49752	0.0125065	0.024174
FBgn0036994	CG5199	uncharacterized protein	498.363	-0.468033	0.133439	-3.50746	0.000452399	0.00118143
FBgn0036995	atk	artichoke	54.0342	-1.23148	0.438937	-2.80561	0.0050222	0.0106006
FBgn0036998	CG5969	uncharacterized protein	723.896	-0.595789	0.213487	-2.79075	0.00525859	0.011045
FBgn0037008	mTerf3	mitochondrial transcription termination factor 3	331.692	-0.500858	0.15386	-3.25528	0.00113281	0.00273232
FBgn0037011	CG4858	uncharacterized protein	843.546	-0.533701	0.204657	-2.60779	0.00911292	0.0181264
FBgn0037012	Rcd2	Reduction in Cnn dots 2	475.601	-1.16064	0.154209	-7.52641	5.21561e-14	5.87907e-13
FBgn0037016	CG13252	uncharacterized protein	2042.33	-0.693089	0.158585	-4.37046	1.23986e-05	4.28078e-05
FBgn0037018	CG4042	uncharacterized protein	718.292	-0.429625	0.118329	-3.63078	0.000282565	0.000770677
FBgn0037020	Pex14	Peroxin 14	1199.51	-0.415033	0.100858	-4.11503	3.87133e-05	0.000123127
FBgn0037021	CG11399	uncharacterized protein	2434.53	-1.17768	0.225097	-5.23186	1.67813e-07	7.75988e-07
FBgn0037022	CG11396	uncharacterized protein	575.255	-0.518645	0.0967188	-5.3624	8.21247e-08	3.97717e-07
FBgn0037025	Spc105R	Spc105-related	799.294	-0.780289	0.26478	-2.94694	0.00320938	0.00706537
FBgn0037027	HIPP1	HP1 and insulator partner protein 1	2454.2	-0.598058	0.0805721	-7.42264	1.14809e-13	1.22819e-12
FBgn0037028	CG3618	uncharacterized protein	542.199	-0.778189	0.125429	-6.2042	5.49766e-10	3.60535e-09
[truncated: 1,270 more rows]

## Sheet: Up in baf GLKD
Table S1. RNA-seq data used in the study
Gene_ID	Symbol	Gene_Name	baseMean	Log2FC	IFcSE	stat	pvalue	adjusted pvalue
FBgn0000014	abd-A	abdominal A	2.81272	2.81272	0.417151	6.7427	1.55469e-11	9.17843e-10
FBgn0000015	Abd-B	Abdominal B	2.76545	2.76545	0.382787	7.22451	5.02927e-13	4.4537e-11
FBgn0000024	Ace	Acetylcholine esterase	2.51231	2.51231	0.800142	3.13983	0.00169046	0.00878534
FBgn0000036	nAChRalpha1	nicotinic Acetylcholine Receptor alpha1	5.42988	5.42988	2.15549	2.51909	0.0117657	0.040885
FBgn0000043	Act42A	Actin 42A	0.615144	0.615144	0.207283	2.96765	0.00300084	0.0140687
FBgn0000044	Act57B	Actin 57B	2.19376	2.19376	0.297823	7.366	1.75825e-13	1.75165e-11
FBgn0000046	Act87E	Actin 87E	2.58843	2.58843	0.49849	5.19254	2.07444e-07	4.62932e-06
FBgn0000055	NA	NA	1.25924	1.25924	0.375503	3.35347	0.000798047	0.00482373
FBgn0000056	Adhr	Adh-related	1.50105	1.50105	0.518434	2.89535	0.00378734	0.0168969
FBgn0000064	Ald1	Aldolase 1	0.871161	0.871161	0.221862	3.92659	8.6159e-05	0.000774667
FBgn0000071	Ama	Amalgam	4.80842	4.80842	1.19516	4.02322	5.74069e-05	0.000552672
FBgn0000075	amd	alpha methyl dopa-resistant	3.95599	3.95599	1.23818	3.19501	0.00139825	0.00754345
FBgn0000083	AnxB9	Annexin B9	1.20546	1.20546	0.153253	7.86581	3.66725e-15	4.74266e-13
FBgn0000092	CG2650	uncharacterized protein	2.01955	2.01955	0.772067	2.61578	0.00890251	0.0330343
FBgn0000152	Axs	Abnormal X segregation	0.677948	0.677948	0.190931	3.55074	0.000384148	0.00265242
FBgn0000153	b	black	1.98598	1.98598	0.542737	3.65919	0.000253017	0.00187445
FBgn0000157	Dll	Distal-less	5.90525	5.90525	2.01232	2.93455	0.00334031	0.0152876
FBgn0000163	baz	bazooka	1.29376	1.29376	0.527173	2.45414	0.0141222	0.0472917
FBgn0000180	bib	big brain	1.49821	1.49821	0.331878	4.51433	6.35168e-06	8.81493e-05
FBgn0000229	bsk	basket	1.0464	1.0464	0.278549	3.75659	0.000172244	0.00135727
FBgn0000241	bw	brown	2.80328	2.80328	0.685113	4.0917	4.28218e-05	0.000434764
FBgn0000244	by	blistery	1.3618	1.3618	0.225859	6.02945	1.64523e-09	6.01884e-08
FBgn0000261	Cat	Catalase	0.960476	0.960476	0.224851	4.27161	1.94066e-05	0.000224161
FBgn0000279	CecC	Cecropin C	3.94764	3.94764	1.37863	2.86346	0.00419041	0.0182003
FBgn0000320	eya	eyes absent	1.6231	1.6231	0.555189	2.9235	0.00346118	0.0157119
FBgn0000356	Cp16	Chorion protein 16	8.74354	8.74354	3.06058	2.85682	0.00427902	0.0185131
FBgn0000357	Cp18	Chorion protein 18	3.75782	3.75782	1.18996	3.15793	0.00158894	0.008359
FBgn0000358	Cp19	Chorion protein 19	6.90506	6.90506	2.68481	2.5719	0.0101141	0.0363574
FBgn0000359	Cp36	Chorion protein 36	5.94758	5.94758	1.5886	3.74392	0.000181173	0.00141564
FBgn0000360	Cp38	Chorion protein 38	5.44959	5.44959	1.77512	3.06998	0.00214077	0.0106352
FBgn0000395	cv-2	crossveinless 2	2.96704	2.96704	0.41679	7.11878	1.08883e-12	8.61641e-11
FBgn0000406	Cyt-b5-r	Cytochrome b5-related	2.42571	2.42571	0.518679	4.67671	2.91511e-06	4.58123e-05
FBgn0000411	D	Dichaete	2.72978	2.72978	0.771628	3.53769	0.00040364	0.00275295
FBgn0000422	Ddc	Dopa decarboxylase	2.3672	2.3672	0.593868	3.98607	6.71768e-05	0.000630942
FBgn0000427	2021-12-01	defective chorion 1	1.95428	1.95428	0.382691	5.10667	3.27891e-07	6.87708e-06
FBgn0000442	Pkg21D	Protein kinase, cGMP-dependent at 21D	3.52521	3.52521	0.768983	4.58426	4.55602e-06	6.66266e-05
FBgn0000451	ect	ectodermal	2.47874	2.47874	0.422979	5.86019	4.62347e-09	1.51287e-07
FBgn0000454	Dip-B	Dipeptidase B	0.468429	0.468429	0.167434	2.79769	0.00514696	0.0214611
FBgn0000459	disco	disconnected	2.69028	2.69028	0.586492	4.58707	4.49519e-06	6.59098e-05
FBgn0000473	Cyp6a2	Cytochrome P450-6a2	1.89177	1.89177	0.657617	2.87671	0.00401841	0.0176595
FBgn0000477	DNaseII	Deoxyribonuclease II	2.98023	2.98023	0.718694	4.14673	3.37257e-05	0.000354676
FBgn0000489	Pka-C3	Protein kinase, cAMP-dependent, catalytic subunit 3	2.036	2.036	0.406545	5.00806	5.49822e-07	1.07124e-05
FBgn0000490	dpp	decapentaplegic	2.47256	2.47256	0.548605	4.507	6.57509e-06	9.05739e-05
FBgn0000492	Dr	Drop	3.03949	3.03949	1.21951	2.49238	0.012689	0.0433244
FBgn0000504	dsx	doublesex	1.92785	1.92785	0.410784	4.6931	2.69098e-06	4.26505e-05
FBgn0000527	e	ebony	2.48326	2.48326	0.609504	4.07424	4.61657e-05	0.000461574
FBgn0000557	eEF1alpha2	eukaryotic translation elongation factor 1 alpha 2	1.08224	1.08224	0.366174	2.95552	0.00312139	0.0144637
FBgn0000567	Eip74EF	Ecdysone-induced protein 74EF	2.4161	2.4161	0.588318	4.1068	4.01175e-05	0.000411563
FBgn0000576	ems	empty spiracles	4.29532	4.29532	1.43598	2.9912	0.00277882	0.0131661
FBgn0000577	en	engrailed	2.92691	2.92691	1.0293	2.84359	0.00446084	0.0191365
FBgn0000592	Est-6	Esterase 6	4.81609	4.81609	1.11857	4.30557	1.66558e-05	0.000196454
FBgn0000633	CG17716	uncharacterized protein	1.87238	1.87238	0.613149	3.05371	0.00226033	0.0110958
FBgn0000636	Fas3	Fasciclin 3	2.27906	2.27906	0.345105	6.60397	4.00297e-11	2.0583e-09
FBgn0000639	Fbp1	Fat body protein 1	3.54461	3.54461	0.771883	4.59217	4.3867e-06	6.45736e-05
FBgn0000640	Fbp2	Fat body protein 2	3.52741	3.52741	0.795725	4.43296	9.29486e-06	0.000120736
FBgn0000644	Fcp3C	Follicle cell protein 3C	2.58416	2.58416	0.792034	3.26268	0.00110362	0.00625288
FBgn0000658	fj	four-jointed	2.15584	2.15584	0.766752	2.81165	0.00492888	0.0207288
FBgn0000659	fkh	fork head	2.79987	2.79987	0.989279	2.83022	0.00465164	0.0197801
FBgn0000667	Actn	alpha actinin	0.974748	0.974748	0.196533	4.95971	7.05978e-07	1.33063e-05
FBgn0000711	flw	flapwing	0.907183	0.907183	0.272748	3.32609	0.000880746	0.00524126
FBgn0000723	FER	FER tyrosine kinase	1.39996	1.39996	0.353789	3.95705	7.58806e-05	0.000697426
FBgn0001075	ft	fat	1.86973	1.86973	0.612021	3.055	0.00225057	0.0110625
FBgn0001089	Gal	beta galactosidase	3.07122	3.07122	0.59615	5.15176	2.58048e-07	5.56924e-06
FBgn0001090	bnb	bangles and beads	2.0096	2.0096	0.702492	2.86067	0.00422745	0.0183255
FBgn0001114	Glt	Glutactin	3.24892	3.24892	0.577162	5.62913	1.81125e-08	5.2222e-07
FBgn0001122	Galphao	G protein alpha o subunit	1.0952	1.0952	0.351007	3.12017	0.00180746	0.00928531
FBgn0001123	Galphas	G protein alpha s subunit	1.16382	1.16382	0.208735	5.5756	2.46679e-08	6.77942e-07
FBgn0001128	Gpdh1	Glycerol-3-phosphate dehydrogenase 1	0.91798	0.91798	0.359676	2.55224	0.0107032	0.0380703
FBgn0001134	Grd	Glycine receptor	2.46359	2.46359	0.979353	2.51553	0.0118853	0.0411978
FBgn0001145	Gs2	Glutamine synthetase 2	2.74802	2.74802	0.436566	6.29464	3.08124e-10	1.31223e-08
FBgn0001168	h	hairy	0.797525	0.797525	0.184349	4.32618	1.51718e-05	0.000180862
FBgn0001187	Hex-C	Hexokinase C	2.43481	2.43481	0.612951	3.97227	7.11913e-05	0.000662512
FBgn0001189	hfw	halfway	0.424157	0.424157	0.163516	2.59399	0.009487	0.0347183
FBgn0001208	Hn	Henna	2.37843	2.37843	0.52164	4.55953	5.12691e-06	7.35297e-05
FBgn0001216	Hsc70-1	Heat shock protein cognate 1	1.27432	1.27432	0.492473	2.58759	0.00966511	0.0352084
FBgn0001227	Hsp67Ba	Heat shock gene 67Ba	1.04184	1.04184	0.238987	4.3594	1.30417e-05	0.000159561
[truncated: 2,143 more rows]

## Sheet: Down in baf GLKD
Table S1. RNA-seq data used in the study
[truncated: 1,165 more rows]

[truncated: 8 more sheets: Up in chk2,emerin, Down in chk2,emerin, Up in emerin and baf GLKD, Down in emerin and baf GLKD, EDG_Up, EDG_Down, CDG_Up, CDG_Down]
